# Supplementary material for: A chromosome-level, haplotype-phased Vanilla planifolia genome highlights the challenge of partial endoreplication for accurate whole-genome assembly
Source: PubMed Central journal article supplement — Plant Commun. 2022 May 5;3(5):100330. doi: 10.1016/j.xplc.2022.100330 (PMC9482989; doi:10.1016/j.xplc.2022.100330), 2022-05-05
Supplement: mmc1.pdf [file mmc1.pdf]

**Plant Communications, Volume 3**

**Supplemental information**

**A chromosome-level, haplotype-phased *Vanilla planifolia* genome highlights the challenge of partial endoreplication for accurate whole-genome assembly**

**Quentin Piet, Gaetan Droc, William Marande, Gautier Sarah, Stéphanie Bocs, Christophe Klopp, Mickael Bourge, Sonja Siljak-Yakovlev, Olivier Bouchez, Céline Lopez-Roques, Sandra Lepers-Andrzejewski, Laurent Bourgois, Joseph Zucca, Michel Dron, Pascale Besse, Michel Grisoni, Cyril Jourda, and Carine Charron**

## SUPPLEMENTAL INFORMATION

1  
2  
3  
4  
5  
6  
7  
8  
9  
10  
11  
12  
13  
14  
15  
16  
17  
18  
19  
20  
21  
22  
23  
24  
25  
26  
27  
28  
29  
30  
31  
32  
33  
34  
35  
1

### Supplemental Note 1

#### Global strategy for the sequencing and assembly of *V. planifolia* CR0040 genome

The assembly of the CR0040 genome and the study of the partial endoreplication (PE) phenomenon required interdisciplinary work and a multitude of sequencing technologies, which has proven to be crucial for the detection to detect PE along the assembled chromosomes (Supplemental Figure 1).

#### Plant material

A traditional *Vanilla planifolia* cultivar from La Reunion was used for this study. It is conserved by CIRAD under the accession number CR-VA-00040 (“CR0040”) in the Biological Resources Center Vatel (Saint Pierre, La Réunion) where it is maintained by cuttings under shade-house and by *in vitro* culture established from axillary buds. The vitroplants were propagated by micro-cuttings in basal Murashige and Skoog media (Duchefa Biochemie, The Netherlands) without any phytohormone. They were grown at 24-26°C, 12H light/day. Morphological data and genetic analyses confirm its taxonomic position within the *V. planifolia* species (Bory et al., 2008; Bouétard et al., 2010; Favre et al., 2022), and its membership of the group of vanilla cultivars usually grown in the Indian Ocean region. The profile of aromatic precursors identified in its fruits is typical of vanillas used for Bourbon vanilla production (Perez-Silva et al., 2006).

#### Flow cytometry

The total nuclear DNA amount was assessed by flow cytometry (FCM) as described in Bourge et al. (2018). Internal reference used for cytometry was *Petunia hybrida* Vilm. “PxPc6” (2C=2.85 pg). Leaves of the internal standard and nodal tissues from three to five month-old *in vitro* *V. planifolia* CR0040 were chopped using a razor blade in a plastic Petri dish with 1 ml of Gif nuclei-isolation buffer (45 mM MgCl<sub>2</sub>, 30 mM sodium citrate, 60 mM MOPS, 1% (w/v) polyvinylpyrrolidone 10,000, pH 7.2) containing 0.2% (w/v) Triton X-100, supplemented with 5 mM sodium metabisulphite and RNase (2.5 U/mL). The suspension was filtered through 50-µm nylon mesh. The nuclei were stained with 70-100 µg/ml propidium iodide, a specific DNA fluorochrome intercalating dye, and kept 5 min at 4°C. DNA content of 5,000–10,000 stained nuclei were determined for each sample using a cytometer (CytoFLEX S, Beckman Coulter, Excitation 561 nm; emission through a 610/20 nm band-pass filter). Nuclei were identified by a gate on Side-Scatter and propidium iodide (PI)-Area and the cytogram of PI-Area versus PI-Height signals served to

36 select singlets, to eliminate doublets and to detect any degradation. Different cell ploidy levels were  
37 identified by their fluorescence intensity in PI, compared to the standard. The DNA histogram of  
38 nodal tissues from *Vanilla planifolia* CR0040 and nuclear classes in FCM samples are illustrated in  
39 the Supplemental Figure 2 and Supplemental Table 1, respectively. Note that there was a large  
40 variability between each endoploidy proportions for the 13 individuals.

41 The component F represents the Fixed part of the haploid genome which does not endoreplicate.  
42 The component P represents the part potentially participating in endoreplication. P and F are  
43 proportions (and not amounts) of the genome (%), whereas p and f are amounts (typically pg). Note  
44 that, as proportions, F and P have the same value whether referring to the haploid or to the diploid  
45 genome. As described in Brown et al. 2017, the replicate fraction P is assessed from the relative  
46 fluorescence intensity (I, arbitrary units) of peak#2 (4E, the first endocycle population) to peak#1  
47 (2C nuclei):  $P = [(I_{\text{peak2}} / I_{\text{peak1}}) - 1] \times 100$

48 In quantitative terms, the haploid nucleus is (1f+1p) pg, and diploid nucleus is (2f+2p) pg. So 4E  
49 nuclei have four copies of the part of the genome which replicates, and two copies of the rest of the  
50 genome which does not replicate, in total 2f+4p (pg). The 8E nuclei have 2f+8p (pg), etc.

51

## 52 **Cytogenetics**

53 Root tips were obtained from *Vanilla planifolia* CR0040 plantlets cultivated in vitro in the VATEL  
54 biological resource center based in La Réunion. They were pretreated with 0.05% colchicine  
55 aqueous solution at room temperature during 1h and then fixed in absolute ethanol and glacial  
56 acetic acid (3:1) for at least two days at 4 °C. Root tips were hydrolyzed in 1 M HCl for 12 min at  
57 60 °C, washed in distilled water at room temperature, and stained in 1% orcein in 45% acetic acid  
58 for about 30 min. Root tip meristems were squashed in a droplet of acetic carmine and observed  
59 under Zeiss Axiophot microscopes. Chromosome number was determined on five to seven well-  
60 spread metaphase plates from each of seven of those in vitro cultivated plantlets. The best  
61 metaphase plates were photographed using a CCD camera (RETIGA 2000R; Princeton Instruments,  
62 Evry, France).

63 For fluorochrome banding (Chromomycin A<sub>3</sub>, Hoechst 33258 and DAPI- 4',6-diamidino-2-  
64 phenylindole), the meristems were hydrolyzed for about 1 h at 37° C in an enzymatic mixture  
65 composed of 4% cellulase RS (Onozuka Yakult Honsha Co.), 1% pectolyase Y23 (Seishin  
66 Pharmaceutical Co, Tokyo, Japan), and 4% hemicellulase (Sigma Chemical Co) in 0.01M citrate  
67 buffer at pH 4.6. Thus, digested meristems were squashed into a drop of freshly prepared 50%  
68 acetic acid and the preparations were observed using an epifluorescence Zeiss Axiophot microscope  
69 with different combinations of excitation and emission filter sets (01, 07, 15, and triple 25). The  
70 best slides were frozen at -80°C at least during 12 h. The coverslips were removed and the slides

71 were rinsed with absolute ethanol and air-dried. To detect GC- and AT-rich DNA regions,  
72 meristematic tissue was stained respectively with chromomycin A<sub>3</sub> (CMA) (Serva, France)  
73 according to Schweizer (1976), and with Hoechst 33258 (Ho; Sigma) according to Martin and  
74 Hesemann (1988) with minor modifications of Siljak-Yakovlev et al. (2002). The slides were  
75 mounted in citifluor AF2 (Agar Scientific Oxford Instruments, Stanstead, UK). The DAPI was used  
76 to observe an unspecific heterochromatin. The acquisition and treatment of images were performed  
77 using a highly sensitive CCD camera (RETIGA 2000R, Princeton Instruments, Evry, France) and  
78 an image analyzer (MetaVue, Evry, France).

79

### 80 **High molecular weight DNA extraction and sequencing**

81 High molecular weight (HMW) DNA was extracted from 1g of nodal tissues from *in vitro* cultured  
82 *Vanilla planifolia* CR0040 in order to minimize the endoreplicated phenomenon using QIAGEN  
83 genomic tip kit. DNA libraries and sequencing were performed at GeT-PlaGe core facility, INRAE  
84 Toulouse.

85 The Sequel2 HiFi library preparation and sequencing were performed according to the  
86 manufacturer's instructions "Procedure and Checklist Preparing HiFi SMRTbell Libraries using  
87 SMRTbell Express Template Prep Kit 2.0". At each step, DNA was quantified using the Qubit  
88 dsDNA HS Assay Kit (Life Technologies). DNA purity was tested using the nanodrop  
89 (Thermofisher) and size distribution and degradation assessed using the Femto pulse Genomic DNA  
90 165 kb Kit (Agilent). Purification steps were performed using AMPure PB beads (PacBio) and  
91 15µg of DNA was purified then sheared at 15kb using the Megaruptor3 system (Diagenode). A  
92 single strand overhang removal and a DNA and END damage repair step were performed on 10µg  
93 of sample using SMRTbell Express Template prep kit 2.0. Then blunt hairpin adapters were ligated  
94 to the library. The library was treated with an exonuclease cocktail to digest unligated DNA  
95 fragments. A size selection step using a 12kb cutoff was performed on the BluePippin Size  
96 Selection system (Sage Science) with "0.75% DF Marker S1 3-10 kb Improved Recovery" protocol.  
97 Using Sequel® II Binding kit 2.0 and sequencing kit 2.0, the primer V2 annealed and polymerase  
98 2.0 bounded library was sequenced by diffusion loading onto 3 SMRTcells on Sequel2 instrument  
99 at 55pM with a 2 hours pre-extension and a 30 hours movie. HiFi reads are produced by calling  
100 consensus from subreads generated by multiple passes of the enzyme around a circularized template  
101 from a single zero mode waveguide. HiFi reads were generated with the "Circular Consensus  
102 Sequencing (CCS)" pipeline in SMRT Link v8.0 (ccs, version 4.0.0) with default parameters  
103 (minimum predicted accuracy of 0.99, minimum number of passes = 3)".

104 The Chromium libraries were prepared according to 10X Genomics' protocols using the Genome  
105 Reagent Kits v2. The sample quantity and quality controls were validated on Qubit, Nanodrop and



106 Femto. Optimal performance has been characterized on input gDNA with a mean length greater  
107 than 50 kb. The libraries were prepared from 3 µg of HMW gDNA (cut off at 50Kb using the  
108 BluePippin system). Briefly, in the microfluidic Genome Chip, a library of Genome Gel Beads is  
109 combined with HMW template gDNA in Master Mix and partitioning oil to create Gel Bead-In-  
110 EMulsions (GEMs) in the Chromium. Each Gel Bead is functionalized with millions of copies of a  
111 10x™ Barcoded primer. Upon dissolution of the Genome Gel Bead in the GEM, primers containing  
112 (i) an Illumina R1 sequence (Read 1 sequencing primer), (ii) a 16 bp 10x Barcode, and (iii) a 6 bp  
113 random primer sequence are released. Read 1 sequence and the 10x™ Barcode are added to the  
114 molecules during the GEM incubation. P5 and P7 primers, read 2, and sample index are added  
115 during library construction. 10 cycles of PCR were applied to amplify libraries. Library quality was  
116 assessed using a Fragment Analyser and libraries were quantified by QPCR using the Kapa Library  
117 Quantification Kit. The libraries have been performed on an Illumina HiSeq3000 using a paired-end  
118 read length of 2x150 pb with the Illumina HiSeq3000 sequencing kits.

119 Oxford Nanopore Technologies (ONT) library preparation and sequencing were performed  
120 according to the manufacturer's instructions "1D gDNA selecting for long reads (SQK-LSK109)".  
121 At each step, DNA was quantified using the Qubit dsDNA HS Assay Kit (Life Technologies). DNA  
122 purity was tested using the nanodrop (Thermofisher) and size distribution and degradation assessed  
123 using the Fragment analyzer (AATI) High Sensitivity DNA Fragment Analysis Kit. Purification  
124 steps were performed using AMPure XP beads (Beckman Coulter). 8 libraries were prepared, for  
125 each library, 5µg of DNA was purified then sheared at 20kb to 40kb using the megaruptor 1 system  
126 (diagenode). A one step DNA damage repair + END-repair + dA tail of double stranded DNA  
127 fragments was performed on 2µg of sample. Then adapters were ligated to the library. Libraries  
128 were loaded onto 3 R9.4.1 revD GridION flowcells and sequenced on GridION instrument at  
129 30fmol within 48H and onto 5 R9.4.1 revD PromethION flowcells and sequenced on PromethION  
130 instrument at 25 fmol within 72H.

131 DNA-seq data production per technology and instrument are indicated in the Supplemental Table 2.

132

### 133 **Ultra-HMW DNA extraction and Optical mapping**

134 Ultra-HMW DNA were purified from one gram of nodal tissues at the base of the young leaves  
135 according to the Bionano Prep Plant tissue DNA Isolation Liquid Nitrogen Grinding Protocol  
136 (30177 - Bionano Genomics) with the following specifications and modifications. Briefly, the  
137 tissues were broken in liquid nitrogen and then ground with rotor stator in the homogenization  
138 buffer. Nuclei were washed and then embedded in agarose plugs. After overnight proteinase K  
139 digestion in the presence of Lysis Buffer (Bionano Genomics) and one-hour treatment with RNAse  
140 A (Qiagen), plugs were washed four times in 1x Wash Buffer (Bionano Genomics) and five times

141 in 1x TE Buffer (ThermoFisher Scientific). Then, plugs were melted two minutes at 70°C and  
142 solubilized with 2 µL of 0.5 U/µL AGARase enzyme (ThermoFisher Scientific) for 45 minutes at  
143 43°C. A dialysis step was performed in 1x TE Buffer (ThermoFisher Scientific) for 45 minutes to  
144 purify DNA from any residues. The DNA samples were quantified by using the Qubit dsDNA BR  
145 Assay (Invitrogen). The presence of mega base size DNA was visualized by pulsed field gel  
146 electrophoresis. Labeling and staining of the uHMW DNA were performed according to the  
147 Bionano Prep Direct Label and Stain (DLS) protocol (30206 - Bionano Genomics). Briefly, labeling  
148 was performed by incubating 750 ng genomic DNA with 1× DLE-1 Enzyme (Bionano Genomics)  
149 for 2 hours in the presence of 1× DL-Green (Bionano Genomics) and 1× DLE-1 Buffer (Bionano  
150 Genomics). Following proteinase K digestion and DL-Green cleanup, the DNA backbone was  
151 stained by mixing the labeled DNA with DNA Stain solution (Bionano Genomics) in presence of  
152 1× Flow Buffer (Bionano Genomics) and 1× DTT (Bionano Genomics), and incubating overnight at  
153 room temperature. The DLS DNA concentration was measured with the Qubit dsDNA HS Assay  
154 (Invitrogen). Labelled and stained DNA was loaded on the Saphyr chip. Loading of the chip and  
155 running of the Bionano Genomics Saphyr System were all performed according to the Saphyr  
156 System User Guide (30247 - Bionano Genomics). Data processing was performed using the  
157 Bionano Genomics Access software (<https://bionanogenomics.com/support-page/bionano-access-software/>). A total of 590 Gb data with molecules larger than 150kb was produced and then *de novo*  
159 assembled according to the Access software. It produced 950 genome maps with a N50 of 4.6 Mbp  
160 for a total genome map length of 2,115 Gbp.

161

162

## 163 **Supplemental Note 2**

164

### 165 **Genome assembly and pseudomolecules construction**

166 Illumina 10X, ONT and PacBio HiFi reads were assembled using respectively Supernova (v.2.1.1,  
167 Weisenfeld et al., 2017), Flye (v.2.4.2-release, <https://github.com/fenderglass/Flye>, Kolmogorov et  
168 al., 2019) followed by three iterative polishing with Illumina data using Pilon (v.1.22,  
169 <https://github.com/broadinstitute/pilon>, Walker et al., 2014) and Hifiasm v.0.13 (Cheng et al.,  
170 2021), with default parameters. A meta-assembly of corrected ONT reads from Canu and PacBio  
171 HiFi reads was tentatively generated using Hifiasm. The assembly metrics were computed with  
172 QUAST 5.1.0 (Gurevich et al., 2013) and summarized in Supplemental Table 3.

173 Hybrid scaffolding was performed between the best assembly (PacBio HiFi assembly) and optical  
174 genome maps with hybridScaffold pipeline and default parameters  
175 (<https://bionanogenomics.com/wp-content/uploads/2018/04/30073-Bionano-Solve-Theory-of->

176 Operation-Hybrid-Scaffold.pdf). We obtained 874 hybrid scaffolds with the maximum size of 32  
177 Mb, reaching 1.9 Gb and N50 of 6.2Mb. The not anchored contigs represent 1,529 Mb and 23,037  
178 contigs from the PacBio assembly. This hybrid scaffold file is composed of the 2 allelic versions of  
179 the genome. In order to separate the alleles, we used an in-house script. Briefly, the fasta file is  
180 transformed into an optical maps file (.cmap). This cmap file is aligned against itself using Bionano  
181 tools to create a xmap file that has the information of all the scaffold id that align against each  
182 scaffold id. With this information, a parsing algorithm, coded in java, produces 2 files with 1 allele  
183 in each file. Contigs not belonging to scaffolds were split among haplotype using purge dups  
184 ([https://github.com/dfguan/purge\\_dups](https://github.com/dfguan/purge_dups)). We then only kept contigs that were unassigned to  
185 scaffolds and added those from the “hap” file to haplotype A and those from the “purged” file to  
186 haplotype B. To organize the scaffolds into pseudomolecules, haplotype A fasta file was aligned  
187 against *Daphna* haplotype A chromosomes using the same Bionano tools. In that way, 36 scaffolds  
188 were organized in 14 chromosomes for haplotype A and 49 scaffolds for haplotype B.

189

### 190 **Evaluation of assembly quality**

191 The metrics for the best assembly were: assembly for haplotype A has 1.5 Gb, N50 = 3 Mb and  
192 3,874 scaffolds or contigs and assembly for haplotype B has 1.9 Gb, N50 =0.4Mb and 17,655  
193 scaffolds or contigs (Supplemental Table 4). We then looked for universal single copy orthologs  
194 genes with BUSCO 5.0.0. This analysis was done for the whole assembly and for both haplotypes  
195 apart on three levels of taxonomy using the following databases: *viridiplantae\_odb10*,  
196 *embryophyta\_odb10* and *liliopsida\_odb10* (Supplemental Table 5).

197

198

### 199 **Supplemental Note 3**

200

### 201 **RNA extraction and sequencing**

202 Total RNA was extracted from nine organs (fruit, leaf, flower, stem, soil root, aerial root, axillary  
203 stem bud, flower bud and ovary) using the RNeasy Plant Mini kit, according to the manufacturer’s  
204 protocol (Qiagen, Hilden, Germany). RNA purity, quantification, and integrity were evaluated using  
205 a NanoDrop 2000 spectrophotometer (Thermo Scientific, USA) and Agilent 4200 bioanalyzer  
206 (Agilent Technologies, Santa Clara, CA, USA). Only samples with an RNA Integrity Number  
207 (RIN)  $\geq 8$  were subjected to subsequent analysis and indicated in Supplemental Table 6.

208 RNA-seq libraries were prepared according to Illumina’s protocols using the Illumina TruSeq  
209 Stranded mRNA sample prep kit to analyze mRNA at the GeT-PlaGe core facility, INRAe  
210 Toulouse. Briefly, mRNAs were selected using poly-T beads and then fragmented to generate

211 double stranded cDNA. Adaptors were ligated to cDNA and 11 cycles of PCR were applied to  
212 amplify libraries. Library quality was assessed using a Fragment Analyzer and then quantified by  
213 qPCR using the Kapa Library Quantification Kit. RNA-seq experiments were performed on an  
214 Illumina NovaSeq using a paired-end read length of 2x150 pb with the Illumina NovaSeq  
215 sequencing kits.

216

### 217 **RNA-seq assembly and gene expression**

218 RNA-seq reads of ten samples (the nine sequenced organs and a mix of them) were mapped onto  
219 the *Vanilla planifolia* CR0040 contig assembly using hisat2 (v.2.1.0) with default parameters (Kim  
220 et al., 2019), which resulted in one alignment file per sample. Each of these files were then  
221 coordinate-sorted and converted to BAM format in order for them to be compatible with the  
222 StringTie (v.2.0.3, Pertea et al., 2015), the RNA-seq alignment assembler used with default  
223 parameters. The resulting output files (gtf format) were used for a last StringTie run with the "--  
224 merge" option, thus producing a non-redundant set of transcripts as a single output file,  
225 corresponding to the final set of assembled transcripts. Main statistics of the RNA-seq experiment  
226 are detailed in Supplemental Table 7.

227 To estimate gene expression in the nine different tissues and to identify putative novel isoforms, we  
228 followed the StringTie's recommended protocol by realigning the corresponding RNA-Seq reads to  
229 the reference with hisat2 (v.2.2.1) using perl scripts provided by hisat2 (*extract\_exon.py* and  
230 *extract\_splice\_sites.py*) to extract exon and splice site information from the annotation of the  
231 CR0040 final assembly. Alignment files were sorted by coordinates and converted to BAM format  
232 with the samtools utility (v.1.10). Then, RNA-seq reads were assembled using StringTie (v.2.0.3)  
233 with a GTF file containing transcripts coordinates from the annotation of the CR0040 assembly (-G  
234 option to specify the file), that is used to guide the assembly. The output files were then merged to  
235 remove redundancy between samples (StringTie v.2.0.3 with --merge and -G options) and to  
236 generate a single gtf file containing their coordinates. Finally, a final StringTie run was performed  
237 in order to re-estimate transcript abundance and generate read coverage tables (-B and -e options  
238 were used) for each sample, in regards to the merged set (-G option). These tables were then used  
239 by the prepDe.py script to compute genes and transcripts count matrices (see RNA-seq tracks in  
240 <https://vanilla-genome-hub.cirad.fr/content/v-planifolia-cr0040>).

241 A BUSCO analysis was performed using the Viridiplantae database to estimate the genic  
242 completeness for each transcriptome and for merged transcriptomes (Supplemental Table 8).

243

### 244 **Structural and functional genome annotation**

245 Automatic gene prediction was performed using EuGene Eukaryotic Pipeline (EGNEP v.1.5 with  
246 EuGene v.4.2a), an integrative gene finder software that is able to combine several sources of  
247 information in order to predict genes (Sallet et al., 2019). This pipeline can infer a structural gene  
248 annotation considering homology with known sequences, structural information in the form of  
249 GFF3 files and statistical information.

250 EuGene's internal prediction model can be built and trained using proteomic and transcriptomic  
251 data. Thus, a set of annotated *V. planifolia* *Daphna* proteins (NCBI Genomes: haplotype A,  
252 BioProject Accession: PRJNA633886, GenBank assembly accession: GCA\_016413895.1 and  
253 haplotype B, BioProject Accession: PRJNA668740, GenBank assembly accession:  
254 GCA\_016413885.1) as well as a combination of the non-redundant set of transcripts of *V. planifolia*  
255 CR0040 assembled with Stringtie and the *V. planifolia* *Daphna* annotated transcripts  
256 (\*.rna\_from\_genomic.fna.gz) were submitted to the pipeline for this task. The rest of the proteomic  
257 data used as evidence are a combination of *Phalaenopsis equestris* proteins retrieved from RefSeq  
258 (NCBI RefSeq Genome: BioProject Accession: PRJNA382149, Annotation Release 100 accession:  
259 GCF\_001263595.1) and the Uniprot/Swissprot *Liliopsida* database (2020\_06 version). One Trinity  
260 assembly of a *Vanilla planifolia* *Jacks* (Solano-De la Cruz et al., 2019) retrieved from the NCBI  
261 database (NCBI Transcriptome: BioProject Accession: PRJNA554104, GEO Series: GSE134155)  
262 was also used as transcriptomic evidence. The pipeline comes with repeat detection software such  
263 as Red (Girgis et al., 2015) and LTRharvest (Ellinghaus et al., 2008), and similarity searches against  
264 RepBase (REPET, version 20.05) are also performed to clean the proteomic datasets at the start of  
265 the annotation process.

266 As EuGene also uses statistical models for splice sites detection, we built an orchids specific model  
267 from the genomic and transcriptomic data of *V. planifolia* *Daphna*, *Dendrobium catenatum* (NCBI  
268 RefSeq Genome: BioProject Accession: PRJNA453230, Annotation Release 101 acc:  
269 GCF\_001605985.2), *Phalaenopsis equestris* (NCBI RefSeq), and our *V. planifolia* CR0040 clone  
270 using the `egn_build_wam.pl` companion script.

271 In order to assign functions to the predicted protein coding genes. InterProScan domain searches as  
272 well as similarity searches (BlastP) against Uniprot/Swissprot and Uniprot/TrEMBL databases were  
273 performed. Putative gene models were sorted into six confidence classes (from ISS\_1 to ISS\_6)  
274 based on their functional annotation. In order to filter protein coding genes, ISS\_6 genes (96,224  
275 sequences), ISS\_5 genes with protein sequence shorter than 150 amino acids (aa) and with  
276 untranslated region (UTR) shorter than 35 base pairs (bp), and ISS\_4 genes with protein sequences  
277 shorter than 80 amino acids and without UTR sequence were removed (98,718 sequences). Among  
278 remaining putative genes, ISS\_5 genes, ISS\_4 genes and ISS\_3 fragments genes coding for protein  
279 sequences with matches in RepBase were also removed (3,527 sequences). In addition, putative

280 gene models with protein sequences predicted to have MULE transposase interpro domains  
281 (IPR018289) without match on FAR protein (FAR-RED impaired response 1, transcription  
282 activator that derived from ancient transposases) domain (IPR031052), or reverse transcriptase  
283 domain (IPR000477) without NMAT (nuclear intron maturase 1 mitochondrial, IPR024937)  
284 domain and TERT family domains (telomerase reverse transcriptase, IPR003545) were removed  
285 (589 sequences). Putative genes encoding for gagpol polyprotein and not associated to  
286 Benchmarking Universal Single-Copy Orthologs (BUSCO) and putative genes located on  
287 organellar contigs were removed (23,237 sequences). After filtering steps, 59,128 high-confidence  
288 protein coding genes were kept. The number of these genes per chromosome and per haplotype as  
289 well as main statistics of these genes are indicated in the Supplemental Tables 9 and 12.

290 Functions were assigned through InterProScan domain searches as well as similarity searches  
291 against Uniprot/Swissprot and Uniprot/TrEMBL databases (BlastP). Gene Ontology (GO) terms  
292 were assigned through InterProScan (Jones et al., 2014) results while Enzyme Classification (EC)  
293 numbers were predicted combining both tools PRIAM (Claudel-Renard et al., 2003) and  
294 BlastKOALA (Kanehisa et al., 2016).

295 Enzymes and metabolic pathways were predicted from the protein-coding genes using Pathway  
296 Tools (Karp et al., 2002). A file in the PathoLogic format was created, which included gene  
297 functional descriptions, GO terms and enzyme commission numbers. This file will be used to set up  
298 Pathways tools (see Supplemental Note 6). In order to assess the completeness of the resulting set  
299 of protein coding gene models, a BUSCO (Benchmarking Universal Single-Copy Orthologs)  
300 analysis (v4.0.5) was carried out using three different databases, namely Viridiplantae,  
301 Embryophyta and Liliopsida (Supplemental Table 10).

302 From repeats detected by EGNEP, 1,472 interspersed repeats were selected based on the consensi  
303 found by RepeatModeler (v2.0.1) (Flynn et al., 2020), enriched with consensi of RepeatScout  
304 (v1.0.5) (Price et al, 2005) and transposable element genes (TEG) predicted from EGNEP (REGN  
305 TEG), according to the following procedure of classification, filtering and clustering.

306 Consensi families were generated by RepeatScout (RS) and RepeatModeler (RM) from the CR0040  
307 genome assembly (21,529 sequences): 1,247 TEG, 1,958 RS consensi and 1,236 RM consensi were  
308 then classified with REPET (v3.0) and PASTEC (v2.0) (Hoede et al., 2014) according to the  
309 Wicker's TE classification (Wicker et al., 2007) and using RepBase (REPET, version 23.12),  
310 cleaned by removing SSR and rDNA sequences, requalified with REPET postProcessClassif.py,  
311 then potential host genes were removed and finally clustered with CD-HIT (v4.8.1) (Fu et al.,  
312 2012). A first clustering (cd-hit -c 1 -sc 1) was made between the three filtered sets (1,072 RM,  
313 1,748 RS and 284 TEG) to remove identical sequences. 46 repetitive sequences were removed by  
314 manual curation of the 42 clusters with more than 2 sequences (out of the 3,057 CD-HIT clusters

315 including 3,015 singletons) leading to 3,058 sequences. A second clustering (cd-hit -c 0.85 -sc 1 -aS  
316 0.75) was made on the 3,058 sequences to help us to select 767 transposable elements TE, as  
317 follow: 338 RM TEs, 103 RS TE CD-HIT cluster representatives, 35 REGN TEG cluster  
318 representatives, 7 RS SINEs (RSX) that were not cluster representatives, 259 RS TE singletons not  
319 classified as unknown retrotransposon (RXX) and 25 REGN TEG singletons classified as DNA  
320 transposon (DTX). A third clustering (cd-hit -c 0.85 -sc 1 -aS 0.75) was made on the 693 RM  
321 unknown interspersed repeats (neither classified by RM nor by PASTEC) leading to a reduction of  
322 the set to 639 sequences. This sequence set was concatenated with the 66 RS TE singletons of the  
323 previous clustering and classified as unknown retrotransposon (RXX) and considered as doubtful  
324 TE, leading to 705 unknown interspersed repeats. Then, the genome assembly was annotated with  
325 RepeatMasker (v4.1.1, Tarailo-Graovac et al, 2009) using the two CR0040 interspersed repeat  
326 banks separately (sequences of 767 transposable elements and 705 unknown interspersed repeats  
327 available at <https://vanilla-genome-hub.cirad.fr/filebrowser/download/188>). Bedtools intersect  
328 (v2.29.2, Quinlan et al., 2010) allowed the TE annotation to be given priority over the unknown  
329 interspersed repeat annotation. Summary report of the repeat annotation is detailed in the  
330 Supplemental Table 11.

331

332

#### 333 **Supplemental Note 4**

334

#### 335 **Gene families clustering**

336 Polypeptide sequences of five plant species and CR0040 (14 chromosomes and CR0040\_A0 and  
337 CR0040\_B0 random mosaic chromosomes of unanchored scaffolds) were retrieved in order to carry  
338 out comparative genomic analyses between them: *Arabidopsis thaliana* (TAIR10, Phytozome)  
339 (Lamesch et al., 2012), *Oryza sativa* (IRGSP-1.0, RAP-DB), *Phalaenopsis equestris* (NCBI  
340 RefSeq), *Vanilla planifolia* Daphna (NCBI Genomes) and *Phalaenopsis aphrodite* (Orchidstra 2.0,  
341 Chao et al., 2017). For genes with alternative splicing variants, only the polypeptide corresponding  
342 to the longest transcript was kept and the two haplotypes of each *V. planifolia* cultivar were  
343 separated for the analyses. A total of 237,645 proteins were clustered with Orthofinder2 (v.2.4.0)  
344 using default parameters (Emms et al., 2019). A total of 212,852 proteins (89.5%) were clustered to  
345 27,815 orthogroups (<https://vanilla-genome-hub.cirad.fr/filebrowser/download/187>) with 10.5% of  
346 the whole set were part of species-specific orthogroups, 8,317 were conserved in all the  
347 species/haplotypes and 1,426 corresponded to single-copy orthogroups. With this Orthofinder  
348 analysis, made from proteomes derived from the 14 chromosomes and unanchored scaffolds, we  
349 began to glimpse into the vanilla pangenome. The vanilla core genome is composed of 14,403

350 families and 86,688 genes, common to both CR40 and Daphna genomes. The dispensable genome  
351 of CR0040 contains 3,637 families and 17,258 genes specific to CR0040. The dispensable genome  
352 of Daphna contains 3,804 Daphna specific families and 13,529 genes.

353 The inferred orthogroups were visualized with the UpsetR (Conway et al., 2017) R package to  
354 generate the UpSet plot (Supplemental Figure 5). Among the compared datasets, 596 orthogroups  
355 were only shared by orchids and 1,029 were only shared by the 4 haplotypes of *V. planifolia*  
356 (Daphna and CR0040). Number of conserved and specific gene groups are detailed in the  
357 Supplemental Table 14.

358

### 359 **Expansion and reduction of gene families with CAFE**

360 Forty-seven protein coding genes involved in cell cycle regulation in *A. thaliana* were focused on  
361 (Supplemental Table 17), and orthogroups containing them were analyzed in terms of family  
362 evolution using CAFE (v5, Mendes et al., 2020). Orthogroups showing expansions and/or  
363 contractions in copy numbers, among the six compared plant lineages, were identified using a P  
364 value threshold of 0.001. For this, orthogroups (made from proteomes derived from the 14  
365 chromosomes only) and the species tree produced by orthofinder were used as input. Prior to this  
366 analysis, orthogroups that contained genes in only one species or with more than 100 gene copies  
367 for at least one species were removed. The species tree was made into an ultrametric one with the  
368 `make_ultrametric_tree.py` script bundled with the orthofinder package using an original divergence  
369 of 152 Mya for the analyzed species, as referenced in the TreeTime database (Kumar et al., 2017).  
370 These filtered orthogroups, and the ultrametric species tree were utilized to estimate the  
371 expansion/contraction of orthogroups using one lambda ( $\lambda$ ) model, where  $\lambda$  is a random birth-death  
372 parameter.

373

### 374 **Construction of syntenic blocks**

375 The SynMap workflow (Haug-Baltzell et al., 2017) of the CoGe comparative genomics platform  
376 (Lyons and Freeling, 2008) was used to generate syntenic dotplots between two organism genomes  
377 (haplotypes A of CR0040 and Daphna, as well as *P. aphrodite*). SynMap relies on pairwise  
378 comparison of Coding Sequences (CDS) between the two genomes and allows to compute the  
379 synonymous mutation rate of syntenic CDS pairs.

380 SynMap requires the genome sequence and a gene annotation file of each compared organism. Prior  
381 to the analyses, annotated genes in each species were filtered to keep only the longest isoform of  
382 each gene. For each genome in the comparison, the chromosome fasta file and the gene annotation  
383 gff3 file were loaded using the iCommands to the CyVerse's cloud-based Data Store. Be careful  
384 that all CDS of the same mRNA (e.g. ID=VANPL\_A\_00001g000010.mRNA1) should have the



385 same identifier (e.g. ID=VANPL\_A\_00001c000010; Parent=VANPL\_A\_00001g000010.mRNA1)  
386 otherwise SynMap will overestimate the number of CDSs and this will cause problems during the  
387 tandem gene filtering step. First, tandem duplications are filtered out with the blast\_to\_raw program  
388 (SynMap Analysis Log file of CR0040\_A,  
389 <https://genomeevolution.org/coge/data/diags/62209/62209/1j9ym.log>, source code  
390 <https://github.com/LyonsLab/coge>). Syntenic pairs of CDSs are then identified by finding collinear  
391 series of putative homologous sequences using DAGChainer (Haas et al., 2004). A global alignment  
392 is performed on these syntenic CDS pairs using the Needleman-Wunsch algorithm implemented in  
393 nwalgn (<https://pypi.org/project/nwalgn/>) using the BLOSUM62 scoring matrix, after which a  
394 back translation of this alignment into a codon alignment is processed. Then, codeml-coge, a  
395 modified implementation of CodeML from the PAML package (Yang et al., 2007) is used to  
396 compute the rate of synonymous substitutions per synonymous site for each pair of CDSs (dS called  
397 Ks on the SynMap interface). In the particular case where a genome was aligned against itself, the  
398 identical CDS pairs were removed from the analysis and therefore do not appear in either the  
399 SynMap dotplot (no dots on the central diagonal) or the Ks distribution. However, the dotplot is  
400 symmetrical around the central diagonal so only half the dotplot can be considered.

401

#### 402 **Visual quality control of the assemblies and whole genome duplication exploration using** 403 **pairwise orchid genome synteny**

404 In order to check the quality of the 14 chromosomes of the CR0040 A haplotype (CR0040\_A) *V.*  
405 *planifolia* genome, to compare the 14 chromosomes of haplotype A of both *Vanilla* cultivars and to  
406 study the pan-orchid alpha Whole Genome Duplication ( $\alpha^o$  WGD), a series of analyses were  
407 performed with the CoGe Synmap pipeline, as described above. Synmap pairwise genome synteny  
408 analyses between CR0040\_A and Daphna A haplotype (D\_A) and between themselves were  
409 illustrated in the Supplemental Figure 7. The dotplot of the CDS pairs of the 14 chromosomes of  
410 CR0040\_A (Supplemental Figure 7E) and the histogram of the CDS pair Ks values (Supplemental  
411 Figure 7F) gives a genomic representation suggesting that the 14 chromosomes of CR0040\_A and  
412 the gene annotation is complete and of high quality. The comparison of the CR0040\_A dotplot with  
413 the D\_A dotplot (Supplemental Figure 7A) shows that CR0040 A looks cleaner, with more  
414 continuous paralog diagonals. Also, the dotplot of D\_A CDS against itself displays an unexpected  
415 dotted central diagonal indicating physically close duplicated genes. The cyan color of the diagonal  
416 indicates that the similar CDS pairs belong to the peak with a very low number of synonymous  
417 substitutions per synonymous site ( $\log_{10}(Ks) \approx -1.5$ , light blue bars in the Supplemental Figure 7B).  
418 This artificial peak would correspond to allelic forms due to the heterozygosity and not to WGD  
419 paralogs. This peak could come from a problem of dual haplotype conservation during contig

420 phasing (difficulties to separate the two haplotypes when too close). The D\_A karyotype illustrating  
421 the  $\alpha^\circ$  WGD (Hasing et al., 2020) was aligned onto the 14 chromosomes of the D\_A to identify by  
422 projection the dotplot diagonals corresponding to these 13 blocks of ohnologs ( $\alpha^\circ$  WGD paralogs).  
423 The ancestral karyotype of CR0040\_A was drawn, using an in-house Perl script, from the D\_A  
424 gene pair blocks (Table S10 in Hasing et al., 2020), transferred to CR0040\_A genes via reciprocal  
425 best hits computed in Supplemental Note 6. On the CR0040\_A dotplot, the diagonals corresponding  
426 to the 13 ohnologous blocks were also found, but with slight differences. For example, the  
427 difference found for block number 13, between chromosome 10 and 11, could be due to the fact that  
428 CR0040\_A chromosome 11 (47 Mb with Ns; Supplemental Table 12) is longer than the D\_A  
429 chromosome 11 (38 Mb; Supplemental Table 13). Similarly, on the dotplot of D\_A versus  
430 CR0040\_A (Supplemental Figure 7D), the karyotypes were aligned along the 14 chromosomes,  
431 allowing to find the diagonals corresponding to the 13 ohnolog blocks present on D\_A and  
432 CR0040\_A. The histogram of Ks values of CDS pairs between D\_A and CR0040\_A (Supplemental  
433 Figure 7C) shows two distinct peaks. The first one corresponds to allelic gene pairs between D\_A  
434 and CR0040\_A and the second one to ohnolog pairs. These analyses validate the already known  
435 pan-orchid WGD. Additional short diagonals on the CR0040\_A dotplot and the second peak on the  
436 CR0040\_A Ks histogram suggest an older WGD, probably the tau ( $\tau^m$ ) of Monocots (Hasing et al.,  
437 2020). The blue-green diagonals would correspond to the  $\alpha^\circ$  WGD (*e.g.*  $\log_{10}(Ks) < 0.2$ ) while the  
438 shorter green-red ones would correspond to the monocot  $\tau^m$  WGD (*e.g.*  $\log_{10}(Ks) > 0.2$ ). The  
439 paralogous diagonals between chromosomes 3-5-6-14 could be taken as an example on the  
440 CR0040\_A dotplot (Supplemental Figure 7E). Knowing that the  $\alpha^\circ$  WGD is relatively old (90 Mya;  
441 Hasing et al., 2020) and the sequence of the 14 pseudomolecules of CR0040\_A is of high fidelity, it  
442 is possible that  $\tau^m$  traces are seen. The biology of the species is also a consideration. Vanilla is  
443 perennial with predominant vegetative multiplication that could decrease the mutation rate (Sandler  
444 et al., 2020). The classical formula  $T = Ks / (2r)$  was applied, on a rough example from  
445 Supplemental Figure 7F, with a mutation rate 'r' of 6.5E-9 synonymous substitutions per  
446 synonymous site per generation (Tang et al., 2010). For instance, with a  $\log_{10}(Ks)$  peak median of  
447 0.09, then the  $\alpha^\circ$  WGD would be dated at  $\approx 95$  Mya and with a median at 0.35, the  $\tau^m$  WGD would  
448 be dated at  $\approx 172$  Mya, in agreement with Jiao et al., 2014.

449 Missing pairs of chromosomes 15 and 16 in the *V. planifolia* genome were tentatively searched by  
450 comparison with the *P. aphrodite* genome. Due to problems with *P. aphrodite* CDS positions at the  
451 chromosome level, gene sequences of *P. aphrodite* contigs were aligned to the *P. aphrodite*  
452 chromosomes using Liftoff (Shumate and Salzberg, 2021) as described in Supplemental Note 6 and  
453 these results were used for comparative genomics with CR0040 haplotype A sequence. Synmap  
454 pairwise genome synteny analyses of the 14 pseudomolecules of CR0040\_A *V. planifolia*, the

455 pseudomolecules and longest scaffolds of *P. aphrodite* and between themselves were illustrated in  
456 the Supplemental Figure 8.

457 A first correspondence between the chromosomes of the two species was obtained using the  
458 SynMap Syntenic path assembly (SPA) option (Supplemental Figure 8D, see correspondences at  
459 [https://genomeevolution.org/coge/data/diags/62209/62346/html/master\\_62209\\_62346.CDS-](https://genomeevolution.org/coge/data/diags/62209/62346/html/master_62209_62346.CDS-)  
460 [CDS-last.tdd10.cs0.filtered.dag.all.go\\_D20\\_g10\\_A5.aligncoords.gcoords\\_ct0.w1000.spa-](https://genomeevolution.org/coge/data/diags/62209/62346/html/master_62209_62346.CDS-last.tdd10.cs0.filtered.dag.all.go_D20_g10_A5.aligncoords.gcoords_ct0.w1000.spa-1.mcs1000000.ks.sr.cs1.csoN.log.nsd.spa_info.txt)  
461 [1.mcs1000000.ks.sr.cs1.csoN.log.nsd.spa\\_info.txt](https://genomeevolution.org/coge/data/diags/62209/62346/html/master_62209_62346.CDS-last.tdd10.cs0.filtered.dag.all.go_D20_g10_A5.aligncoords.gcoords_ct0.w1000.spa-1.mcs1000000.ks.sr.cs1.csoN.log.nsd.spa_info.txt)). This initial analysis does not show any *P.*  
462 *aphrodite*'s chromosomes that would not have a match in CR0040. Given the information available:  
463 genome size, chromosome size, complete BUSCO score for the annotated protein coding genes, and  
464 comparative genomics results, there is no strong evidence that essential protein-coding genes are  
465 missing from the current CR0040 genome assembly (chromosomes 15 and 16 would be in the  
466 unplaced scaffolds).

467 Comparison between CR0040 and *P. aphrodite* for the analysis of the pan-orchid WGD is difficult,  
468 in part because the 19 chromosomes of the latter are not well enough assembled. However, the  
469 chromosome 1 of CR0040 contains internal duplications as if the same two ancestral chromosomes  
470 (pre- $\alpha^\circ$  WGD) had been merged (Supplemental Figure 8C). This is not observed in *P. aphrodite*  
471 that seems to have four chromosomes (1, 2, 10b, 17) corresponding to the Vanilla chromosome 1.  
472 The comparison of the two Ks histograms of a genome against itself (Supplemental Figure 8B and  
473 7F) indicated the same kind of peak profile but narrower for *P. aphrodite*. Comparison of the  
474 vanilla genome with the genome of other orchids to search for the missing vanilla chromosomes 15  
475 and 16 does not seem to be an appropriate approach because these chromosomes are probably  
476 small, specific and contain few genes. Their absence would therefore not be an obstacle to the study  
477 of the evolution of monocot genomes.

478

## 479 **Supplemental Note 5**

480

### 481 **Detection of non-endoreplicated genomic regions**

482 Reads from each sequencing technology used in this study (HiFi long reads, ONT long reads and  
483 Illumina short reads from CR0040), as well as ONT long reads and Illumina short reads from  
484 *Daphna* were mapped onto the CR0040 assembly. Minimap2 (Li, 2018) was used for long reads  
485 mapping with the following parameters: -a -x asm20 -t8, and Illumina short reads were mapped  
486 using bwa-mem2 (<https://github.com/bwa-mem2/bwa-mem2>) with default parameters. Sequencing  
487 depths were extracted with the samtools depth script for each position. These values were averaged  
488 for genomic windows of 20Kb which were used to compute global statistics on chromosomes and  
489 to plot depth distributions along the 28 chromosomes and the two random mosaic chromosomes

490 (chr0). Mean sequencing depth of the genome was 19.57, 29.82 and 52.50 for CR0040 cultivar with  
491 HiFi, ONT and Illumina reads, and 27.29 and 46.03 for Daphna cultivar with ONT and Illumina  
492 reads. The chromosome 11A is less covered by sequencing due to the presence of large gaps in its  
493 assembly. The sequencing depth of CR0040 genome per technology is summarized in the  
494 Supplemental Table 15.

495 The sequencing depth of CR0040 genome using Daphna data sequences (Hasing et al., 2020) is  
496 summarized in the Supplemental Table 16. The mean sequencing depth of the two random mosaic  
497 chromosomes (chr0) was lower than the one of the 14 pseudochromosomes for long reads  
498 sequencing technologies (Supplemental Tables 15 and 16). To detect sequencing depth bias and to  
499 limit the risk to detect false positives, the mean of sequencing depth for every 20 successive  
500 windows of 20Kb was computed using Illumina reads for Daphna and using long reads (HiFi +  
501 ONT) for CR0040. All regions with a sequencing depth inferior to 20% of mean sequencing depth  
502 of chromosomes were selected for both Daphna and CR0040. Regions with a decrease in  
503 sequencing depth for both cultivars were identified using the 'bedtools intersect' (version 2.29.2)  
504 and correspond to the endoreplication pattern 1. Low coverage regions identified from the HiFi  
505 CR0040 reads mapping that did not overlap with those identified from the Daphna Illumina reads  
506 mapping corresponded to the endoreplication pattern 2. All automatically identified regions were  
507 manually validated and refined by visualization of sequencing depth drops for each CR0040  
508 chromosome and for all available sequencing datasets (Supplemental Figure 9).

509 Supplemental Figure 10 shows low depth k-mers information in addition to the coverage depth  
510 information presented in Supplemental Figure 9. The ratios of k-mers of depth between 5x and 15x  
511 were computed for genomic windows of 20Kb and plotted along each pair of chromosomes.

512

513

## 514 **Supplemental Note 6**

515

### 516 **Database implementation for Vanilla Genome Hub (VGH)**

517 The VGH was constructed using the Tripal v3 framework, a specific toolkit for the construction of  
518 online community genomic databases, by integrating the GMOD Chado database schema and the  
519 Drupal open source platform (<https://www.drupal.org/>). The genome sequences, predicted gene  
520 models, mRNA and protein sequences were loaded into the database using the 'Data Loaders'  
521 function of Tripal. The Drupal theme of the website is derived from the hardwood genomics  
522 website (<https://github.com/statonlab/hardwood>).

523

### 524 **Gene Search**

525 Gene search can be done in two ways, (i) by querying genes using the Tripal MegaSearch module  
526 (Jung, et al, 2021) and various filters such as name, chromosome position and functional annotation  
527 (putative function, InterPro domain and gene ontology, Figure 6B), (ii) by similarity using BLAST.  
528 The BLAST search interface provides access to datasets from the current genome release, allowing  
529 users to conduct sequence searches against the coding sequences, transcripts, proteins and the  
530 whole-genome assembly (Figure 6C).

531 For both, results are displayed as a dynamic table that summarizes the relevant information on the  
532 corresponding search with a link to the gene report and onto the genome browser.

533 Gene report page provides the user with a view of the metadata associated with the gene models.  
534 These include protein domain composition identified by InterProScan, Gene Ontology (GO)  
535 annotations and KEGG BlastKOALA (Figure 6D).

536

### 537 **Genome Browser**

538 Genome visualization was implemented using the Tripal JBrowse module  
539 ([https://github.com/tripal/tripal\\_jbrowse](https://github.com/tripal/tripal_jbrowse)) (Figure 6E). The module embeds JBrowse (Buels et al.,  
540 2016), an interactive, client-side genome browser, into a Drupal webpage. JBrowse allows users to  
541 visualize features of the reference genome. Each chromosome can be selected from a drop-down  
542 menu, and the browser displays information about the sequence and corresponding gene models.  
543 The gene expression profiles are also displayed in JBrowse. To display RNA-Seq expression  
544 profiles in JBrowse, the read alignment file in BAM format for each accession was converted to  
545 coverage tracks in bigwig format using DeepTools2, and these coverage tracks were then loaded  
546 onto JBrowse.

547

### 548 **Metabolic pathway**

549 The Pathologic file previously produced was processed by Pathway Tools, which predicted a total  
550 of 678 metabolic pathways in vanilla. A pathway database, VanillaCyc ([https://vanilla-genome-  
551 hub.cirad.fr/content/pathways-tools](https://vanilla-genome-hub.cirad.fr/content/pathways-tools)), was built based on these predicted pathways using the web  
552 server of Pathway Tools (Figure 6F). Users can search and browse the predicted pathways, as well  
553 as perform comparative and omics data analysis through the VanillaCyc database.

554 If we take the example of the methyltransferase gene family (Enzyme Commission Number 2.1.1.-),  
555 415 methyltransferases were predicted on both haplotypes CR0040\_A and CR0040\_B. The O-  
556 methyltransferase are involved, among other things, in four phenylpropanoid biosynthetic pathways  
557 predicted by Pathway Tools:

558     The phenylpropanoid biosynthesis (PWY-361)

559     The free phenylpropanoid acid biosynthesis (PWY-2181)

560 The vanillin biosynthesis I (PWY-5665)  
561 The phenylpropanoids methylation (ice plant; PWY-7498)  
562 If we focus on the example of two CR0040 methyltransferases:  
563 VANPL\_B\_00007t006130 (OG0000841), the only Caffeic acid O-methyltransferase predicted  
564 in the vanillin biosynthesis I pathway and also putatively involved in the phenylpropanoid  
565 biosynthesis and  
566 VANPL\_B\_00011t00710 (OG0000449), OMT4 (Vpl\_s126Bg26946.1) homolog possibly  
567 involved in the phenylpropanoid biosynthesis and the phenylpropanoids methylation (ice  
568 plant).

569 Phylogenetic trees of the orthogroups of these polypeptides showed clusters of genes encoding for  
570 Caffeic acid O-methyltransferase (COMT, OG0000841; Supplemental Figure 11A, B) and for O-  
571 methyltransferase (OMT, OG0000449; Supplemental Figure 11C, D). The two OrthoFinder gene  
572 families, OG0000449.fa and OG0000841.fa, are available in the VGH (see download section  
573 below). They were reanalyzed with <https://ngphylogeny.fr/> using the PhyML/OneClick workflow  
574 and advanced setting. Default parameters were used except for PhyML. Tree topology search and  
575 branch support option were set to “best of nearest neighbor interchange (NNI) and subtree pruning  
576 and regrafting (SPR)” and approximate likelihood-ratio test, respectively. Gene names are indicated  
577 in blue, green, red, black, magenta and orange for CR0040 *V. planifolia*, *Daphna V. planifolia*,  
578 *Arabidopsis thaliana*, *Oryza sativa* subsp. *japonica* and *Phalaenopsis equestris*, respectively.

579 Regarding these two OrthoFinder orthogroups, we observed that there is a higher number of genes  
580 predicted in the *Daphna* genome than in the CR0040 one and for CR0040, methyltransferases are  
581 preferentially found on haplotype B (Supplemental Figure 11). This could suggest phenomena that  
582 may be concomitant such as variations of the dispensable genome, assembly problems in the two  
583 *Vanilla planifolia* genomes or annotations. Indeed, in both gene families, the *Daphna* haplotype A  
584 appears to contain tandem methyltransferase clusters (green boxes on DA07 and DA11 genomic  
585 regions in JBrowse; Supplemental Figure 11B, D). However, it can be seen in the genomic region  
586 containing a tandem methyltransferase cluster on *Daphna\_A* chromosome 7, that the cluster is  
587 interrupted by genes that are repeated in 5' (grey boxes in the Supplemental Figure 11B): Protein  
588 disulfide-isomerase LQY1, Type I inositol-1,4,5-trisphosphate 5-phosphatase, Pentatricopeptide  
589 repeat-containing protein, Activating signal cointegrator 1. This may reflect the assembly of two  
590 allelic long reads instead of them being separated in each of the two *Daphna* haplotypes. This is  
591 consistent with other remarks already made along these lines in this article (e.g. optical mapping,  
592 syntenic dotplot). As illustrated with these isozyme examples, it is therefore possible that this is the  
593 same reason why the chromosome scaffolded part is larger in *Daphna* than in CR0040 and why the

594 number of paralogs is overestimated in *Daphna* compared to CR0040. On the contrary, the  
595 CR0040\_A chromosomes would possibly underestimate tandem gene clusters.

596

### 597 **GO enrichment analysis**

598 From a list of genes of interest, it can be interesting to look for enriched biological processes,  
599 molecular functions, or cellular components. This functionality is brought by DIANE (Dashboard  
600 for the Inference and Analysis of Networks from Expression data), as described in Cassan, et al  
601 (2021). Results can be obtained as a data table, a dotplot of enriched GO terms with associated gene  
602 counts and p-values, or an enrichment map linking co-occurring GO terms (Figure 6G).

### 603 **Synteny analysis and visualization**

604 Syntenic blocks and homologous gene pairs within syntenic blocks were identified in the two  
605 vanilla genome sequences, including comparisons both within each genome and between any two  
606 genomes (haplotypes). The protein sequences were first aligned against themselves (within each  
607 genome) as well as between each other (pairwise comparisons) using a reciprocal best hit approach.  
608 Based on the BLASTP results and gene positions, syntenic blocks were determined using  
609 MCScanX with default parameters (Wang et al., 2012). To further facilitate comparative analyses of  
610 genomes, the Synvisio extension module (<https://www.drupal.org/project/synvisio>) was  
611 implemented. The module embeds Synvisio (Bandi, 2020), an interactive multiscale synteny  
612 visualization tool for MCScanX, into a Drupal webpage and provides a simple interface for  
613 managing and creating Synvisio instances (Figure 6H). Liftoff (Shumate and Salzberg, 2021) was  
614 used to align the gene sequences of *Daphna* to the CR0040 genome. For each gene, Liftoff finds the  
615 alignments of the exons that maximize sequence identity while preserving the transcript and gene  
616 structure. This track can be loaded onto JBrowse to visualize the collinearity between the 2 sets of  
617 annotations.

618

### 619 **Download section**

620 A download section grants users direct access to the data used by the different tools that compose  
621 the hub. Assembly of pseudomolecules as well as their structural and functional annotations are  
622 available in FASTA and in GFF3 formats respectively at  
623 <https://vanilla-genome-hub.cirad.fr/content/download>. This section was created using the  
624 Filebrowser module (<https://www.drupal.org/project/filebrowser>).

625 **Supplemental References**

626

627 **Bandi, V. K.** (2020). SynVisio: a multiscale tool to explore genomic conservation, Master of  
628 Science (M.Sc.) dissertation, University of Saskatchewan. 82p.

629 **Bory, S., Da Silva, D., Risterucci, A.M., Grisoni, M., Besse, P., and Duval, M.F.** (2008).  
630 Development of microsatellite markers in cultivated vanilla: Polymorphism and transferability to  
631 other vanilla species. *Scientia Horticulturae*, 115, 420-425. 10.1016/j.scienta.2007.10.020.

632 **Bouétard, A., Lefeuvre, P., Gigant, R., Bory, S., Pignal, M., Besse, P., and Grisoni, M.** (2010).  
633 Evidence of transoceanic dispersion of the genus *Vanilla* based on plastid DNA phylogenetic  
634 analysis. *Molecular Phylogenetics and Evolution*, 55(2), 621-630.

635 **Bourge, M., Brown, S. C., and Siljak-Yakovlev, S.** (2018). Flow cytometry as tool in plant  
636 sciences, with emphasis on genome size and ploidy level assessment. *Genetics and Applications*,  
637 2(2), 1-12.

638 **Brown, S.C., Bourge, M., Maunoury, N., Wong, M., Bianchi, M.W., Lepers-Andrzejewski, S.,**  
639 **Besse, P., Siljak-Yakovlev, S., Dron, M., and Satiat-Jeunematre, B.** (2017). DNA remodeling by  
640 strict partial endoreplication in Orchids, an original process in the plant kingdom. *Genome Biology*  
641 *and Evolution*, 9, 1051-1071. 10.1093/gbe/evx063.

642 **Buels, R., Yao, E., Diesh, C. M., Hayes, R. D., Munoz-Torres, M., Helt, G., Goodstein, D. M.,**  
643 **Elsik, C. G., Lewis, S. E., Stein, L., and Holmes, I. H.** (2016). JBrowse: a dynamic web platform  
644 for genome visualization and analysis. *Genome biology*, 17, 66. [https://doi.org/10.1186/s13059-](https://doi.org/10.1186/s13059-016-0924-1)  
645 016-0924-1.

646 **Cassan, O., Lèbre, S. and Martin, A.** (2021). Inferring and analyzing gene regulatory networks  
647 from multi-factorial expression data: a complete and interactive suite. *BMC Genomics* 22, 387.  
648 <https://doi.org/10.1186/s12864-021-07659-2>.

649 **Chao, Y. T., Yen, S. H., Yeh, J. H., Chen, W. C., and Shih, M. C.** (2017). Orchidstra 2.0-A  
650 Transcriptomics Resource for the orchid family. *Plant and cell physiology*, 58(1), e9.  
651 <https://doi.org/10.1093/pcp/pcw220>.

652 **Cheng, H., Concepcion, G. T., Feng, X., Zhang, H., and Li, H.** (2021). Haplotype-resolved de  
653 novo assembly using phased assembly graphs with hifiasm. *Nature methods*, 18(2), 170–175.  
654 <https://doi.org/10.1038/s41592-020-01056-5>.

655 **Claudé-Renard, C., Chevalet, C., Faraut, T., and Kahn, D.** (2003). Enzyme-specific profiles for  
656 genome annotation: PRIAM. *Nucleic acids research*, 31(22), 6633–6639.  
657 <https://doi.org/10.1093/nar/gkg847>.



658 **Conway, J. R., Lex, A., and Gehlenborg, N.** (2017). UpSetR: an R package for the visualization  
659 of intersecting sets and their properties. *Bioinformatics*, 33(18), 2938–2940.  
660 <https://doi.org/10.1093/bioinformatics/btx364>.

661 **Emms, D. M., and Kelly, S.** (2019). OrthoFinder: phylogenetic orthology inference for  
662 comparative genomics. *Genome biology*, 20(1), 238. <https://doi.org/10.1186/s13059-019-1832-y>

663 **Ellinghaus, D., Kurtz, S., and Willhoeft, U.** (2008). LTRharvest, an efficient and flexible software  
664 for de novo detection of LTR retrotransposons. *BMC bioinformatics*, 9, 18.  
665 <https://doi.org/10.1186/1471-2105-9-18>.

666 **Favre, F., Jourda, C., Grisoni, M., Rivallan, R., Dijoux, J. B., Hascoat, J., Lepers, S., Besse, P.,  
667 and Charron, C.** (2022) A genome-wide assessment of the genetic diversity, evolution and  
668 relationships with allied species of the clonally propagated crop *Vanilla planifolia*. *Genetic  
669 Resources and Crop Evolution*, in press. <https://doi.org/10.1007/s10722-022-01362-1>.

670 **Flynn JM, Hubley R, Goubert C, Rosen, J., Clark, A. G., Feschotte, C., and Smit, A. F.** (2020)  
671 RepeatModeler2 for automated genomic discovery of transposable element families. *Proceedings of  
672 the National Academy of Sciences of the United States of America*, 117(17):9451-9457.  
673 doi:10.1073/pnas.1921046117.

674 **Fu, L., Niu, B., Zhu, Z., Wu, S., and Li, W.** (2012). CD-HIT: accelerated for clustering the next-  
675 generation sequencing data. *Bioinformatics*, 28(23), 3150–3152.  
676 <https://doi.org/10.1093/bioinformatics/bts565>.

677 **Girgis H. Z.** (2015). Red: an intelligent, rapid, accurate tool for detecting repeats de-novo on the  
678 genomic scale. *BMC bioinformatics*, 16, 227. <https://doi.org/10.1186/s12859-015-0654-5>.

679 **Gurevich, A., Saveliev, V., Vyahhi, N., and Tesler, G.** (2013). QUASt: quality assessment tool  
680 for genome assemblies. *Bioinformatics*, 29(8), 1072–1075.  
681 <https://doi.org/10.1093/bioinformatics/btt086>.

682 **Haas BJ, Delcher AL, Wortman JR and Salzberg SL.** (2004) DAGchainer: a tool for mining  
683 segmental genome duplications and synteny. *Bioinformatics*. 20(18):3643-3646.  
684 doi:10.1093/bioinformatics/bth397.

685 **Hasing, T., Tang, H.B., Brym, M., Khazi, F., Huang, T.F., and Chambers, A.H.** (2020). A  
686 phased *Vanilla planifolia* genome enables genetic improvement of flavour and production. *Nature  
687 Food* 1:811-819. 10.1038/s43016-020-00197-2.

688 **Haug-Baltzell, A., Stephens, S. A., Davey, S., Scheidegger, C. E., and Lyons, E.** (2017).  
689 SynMap2 and SynMap3D: web-based whole-genome synteny browsers. *Bioinformatics*, 33(14),  
690 2197–2198. <https://doi.org/10.1093/bioinformatics/btx144>.

691 **Hoede, C., Arnoux, S., Moisset, M., Chaumier, T., Inizan, O., Jamilloux, V., and Quesneville,**  
692 **H.** (2014). PASTEC: an automatic transposable element classification tool. *PloS one*, 9(5), e91929.  
693 <https://doi.org/10.1371/journal.pone.0091929>.

694 **Jiao, Y.N., Li, J.P., Tang, H.B., and Paterson, A.H.** (2014). Integrated syntenic and  
695 phylogenomic analyses reveal an ancient genome duplication in monocots. *Plant Cell* 26:2792-  
696 2802. [10.1105/tpc.114.127597](https://doi.org/10.1105/tpc.114.127597).

697 **Jones, P., Binns, D., Chang, H. Y., Fraser, M., Li, W., McAnulla, C., McWilliam, H., Maslen,**  
698 **J., Mitchell, A., Nuka, G., Pesseat, S., Quinn, A. F., Sangrador-Vegas, A., Scheremetjew, M.,**  
699 **Yong, S. Y., Lopez, R., and Hunter, S.** (2014). InterProScan 5: genome-scale protein function  
700 classification. *Bioinformatics*, 30(9), 1236–1240. <https://doi.org/10.1093/bioinformatics/btu031>.

701 **Jung, S., Cheng, C. H., Buble, K., Lee, T., Humann, J., Yu, J., Crabb, J., Hough, H. and Main,**  
702 **D.** (2021) Tripal MegaSearch: a tool for interactive and customizable query and download of big  
703 data. *Database*. doi: [10.1093/database/baab023](https://doi.org/10.1093/database/baab023).

704 **Kanehisa, M., Sato, Y., and Morishima, K.** (2016). BlastKOALA and GhostKOALA: KEGG  
705 tools for functional characterization of genome and metagenome sequences. *Journal of molecular*  
706 *biology*, 428(4), 726–731. <https://doi.org/10.1016/j.jmb.2015.11.006>.

707 **Karp, P. D., Paley, S., and Romero, P.** (2002). The Pathway Tools software. *Bioinformatics*, 18,  
708 S225–S232. [https://doi.org/10.1093/bioinformatics/18.suppl\\_1.s225](https://doi.org/10.1093/bioinformatics/18.suppl_1.s225).

709 **Kim, D., Paggi, J. M., Park, C., Bennett, C., and Salzberg, S. L.** (2019). Graph-based genome  
710 alignment and genotyping with HISAT2 and HISAT-genotype. *Nature biotechnology*, 37(8), 907–  
711 915. <https://doi.org/10.1038/s41587-019-0201-4>.

712 **Kolmogorov, M., Yuan, J., Lin, Y. and Pevzner, P.A.** (2019) Assembly of long, error-prone  
713 reads using repeat graphs. *Nature Biotechnology*, 37:540.

714 **Kumar, S., Stecher, G., Suleski, M. and Hedges, SB.** (2017) TimeTree: A Resource for  
715 Timelines, Timetrees, and Divergence Times. *Mol Biol Evol* doi:10.1093/molbev/msx116.

716 **Lamesch, P., Berardini, TZ., Li, D., Swarbreck, D., Wilks, C., Sasidharan, R., Muller, R.,**  
717 **Dreher, K., Alexander, DL., Garcia-Hernandez, M., Karthikeyan, AS., Lee, CH., Nelson,**  
718 **WD., Ploetz, L., Singh, S., Wensel, A. and Huala, E.** (2012) The Arabidopsis Information  
719 Resource (TAIR): improved gene annotation and new tools. *Nucleic acids research*. 40 Database  
720 issue D1202-10.

721 **Li, H.** (2018). Minimap2: pairwise alignment for nucleotide sequences. *Bioinformatics*, 34(18),  
722 3094-3100.

723 **Lyons, E. and Freeling, M.** (2008) How to usefully compare homologous plant genes and  
724 chromosomes as DNA sequences. *The Plant Journal* 53 (4), 661-673.

725 **Martin, J., and Hesemann, C. U.** (1988). Cytogenetic investigations in wheat, rye and triticale. I.  
726 Evaluation of improved Giemsa C-and fluorochrome banding techniques in rye chromosomes.  
727 *Heredity*, 61(3), 459-467.

728 **Mendes, F. K., Vanderpool, D., Fulton, B., and Hahn, M. W.** (2020). CAFE 5 models variation  
729 in evolutionary rates among gene families. *Bioinformatics*, btaa1022. Advance online publication.  
730 <https://doi.org/10.1093/bioinformatics/btaa1022>.

731 **Perez-Silva, A., Odoux, E., Brat, P., Ribeyre, F., Rodriguez-Jimenes, G., Robles-Olvera, V.,**  
732 **Garcia-Alvarado, M.A., and Gunata, Z.** (2006). GC-MS and GC-olfactometry analysis of aroma  
733 compounds in a representative organic aroma extract from cured vanilla (*Vanilla planifolia* G.  
734 Jackson) beans. *Food chemistry*, 99:728-735. 10.1016/j.foodchem.2005.08.050.

735 **Pertea, M., Pertea, G. M., Antonescu, C. M., Chang, T. C., Mendell, J. T., and Salzberg, S. L.**  
736 (2015). StringTie enables improved reconstruction of a transcriptome from RNA-seq reads. *Nature*  
737 *biotechnology*, 33(3), 290–295. <https://doi.org/10.1038/nbt.3122>.

738 **Price, A. L., Jones, N. C., and Pevzner, P. A.** (2005). *De novo* identification of repeat families in  
739 large genomes. *Bioinformatics*, 21, i351–i358. <https://doi.org/10.1093/bioinformatics/bti1018>.

740 **Quinlan, A. R., and Hall, I. M.** (2010). BEDTools: a flexible suite of utilities for comparing  
741 genomic features. *Bioinformatics*, 26(6), 841–842. <https://doi.org/10.1093/bioinformatics/btq033>.

742 **Sallet, E., Gouzy, J., and Schiex, T.** (2019). EuGene: An automated integrative gene finder for  
743 Eukaryotes and Prokaryotes. *Methods in molecular biology* (Clifton, N.J.), 1962, 97–120.  
744 [https://doi.org/10.1007/978-1-4939-9173-0\\_6](https://doi.org/10.1007/978-1-4939-9173-0_6).

745 **Sandler, G., Bartkowska, M., Agrawal, A.F., and Wright, S.I.** (2020). Estimation of the SNP  
746 mutation rate in two vegetatively propagating species of duckweed. *G3-Genes Genomes Genetics*  
747 10:4191-4200. 10.1534/g3.120.401704.

748 **Schweizer, D.** (1976). Reverse fluorescent chromosome banding with chromomycin and DAPI.  
749 *Chromosoma*, 58(4), 307-324.

750 **Shumate, A., and Salzberg, S. L.** (2021). Liftoff: accurate mapping of gene annotations,  
751 *Bioinformatics*, 37, 1639–1643, <https://doi.org/10.1093/bioinformatics/btaa1016>.

752 **Siljak-Yakovlev, S., Cerbah, M., Coulaud, J., Stoian, V., Brown, S. C., Zoldos, V., Jelenic, S.,**  
753 **and Papes, D.** (2002). Nuclear DNA content, base composition, heterochromatin and rDNA in  
754 *Picea omorika* and *Picea abies*. *Theoretical and Applied Genetics*, 104(2), 505-512.

755 **Solano-De la Cruz, M.T., Adame-García, J., Gregorio-Jorge, J., Jiménez-Jacinto, V., Vega-**  
756 **Alvarado, L., Iglesias-Andreu, L. G., Escobar-Hernández, E. E., and Luna-Rodríguez, M.**  
757 (2019) Functional categorization of *de novo* transcriptome assembly of *Vanilla planifolia* Jacks.  
758 potentially points to a translational regulation during early stages of infection by *Fusarium*  
759 *oxysporum* f. sp. *vanillae*. *BMC Genomics*, 20(1):826. PMID: 31703622.

760 **Tang, H., Bowers, J. E., Wang, X., and Paterson, A. H.** (2010). Angiosperm genome  
761 comparisons reveal early polyploidy in the monocot lineage. *Proceedings of the National Academy*  
762 *of Sciences of the United States of America*, 107(1), 472–477.  
763 <https://doi.org/10.1073/pnas.0908007107>.

764 **Tarailo-Graovac, M., and Chen, N.** (2009). Using RepeatMasker to identify repetitive elements in  
765 genomic sequences. *Current protocols in bioinformatics*,  
766 <https://doi.org/10.1002/0471250953.bi0410s25>.

767 **Walker, B.J., Abeel, T., Shea, T., Priest, M., Abouelliel, A., Sakthikumar, S., Cuomo, C.A.,**  
768 **Zeng, Q., Wortman, J., 1 Young, S.K. and Earl, A.M.** (2014) Pilon: an integrated tool for  
769 comprehensive microbial variant detection and genome assembly improvement. *PLoS One*,  
770 9:e112963. doi: 10.1371/journal.pone.0112963.

771 **Wang, Y., Tang, H., Debarry, J.D., Tan, X., Li, J., Wang, X., Lee, T.H., Jin, H., Marler, B.,**  
772 **Guo, H., Kissinger, J.C. and Paterson, A.H.** (2012) MCScanX: a toolkit for detection and  
773 evolutionary analysis of gene synteny and collinearity. *Nucleic Acids Research*, 40(7):e49. doi:  
774 10.1093/nar/gkr1293.

775 **Weisenfeld, N. I., Kumar, V., Shah, P., Church, D. M., and Jaffe, D. B.** (2017). Direct  
776 determination of diploid genome sequences. *Genome research*, 27(5), 757-767.

777 **Wicker, T., Sabot, F., Hua-Van, A., Bennetzen, J. L., Capy, P., Chalhoub, B., Flavell, A.,**  
778 **Leroy, P., Morgante, M., Panaud, O., Paux, E., SanMiguel, P., and Schulman, A. H.** (2007). A  
779 unified classification system for eukaryotic transposable elements. *Nature reviews. Genetics*, 8(12),  
780 973–982. <https://doi.org/10.1038/nrg2165>.

781 **Yang, Z.** (2007) PAML 4: phylogenetic analysis by maximum likelihood. *Molecular Biology and*  
782 *Evolution*, 24(8):1586-1591. doi:10.1093/molbev/msm088.

# 1 Supplemental figures

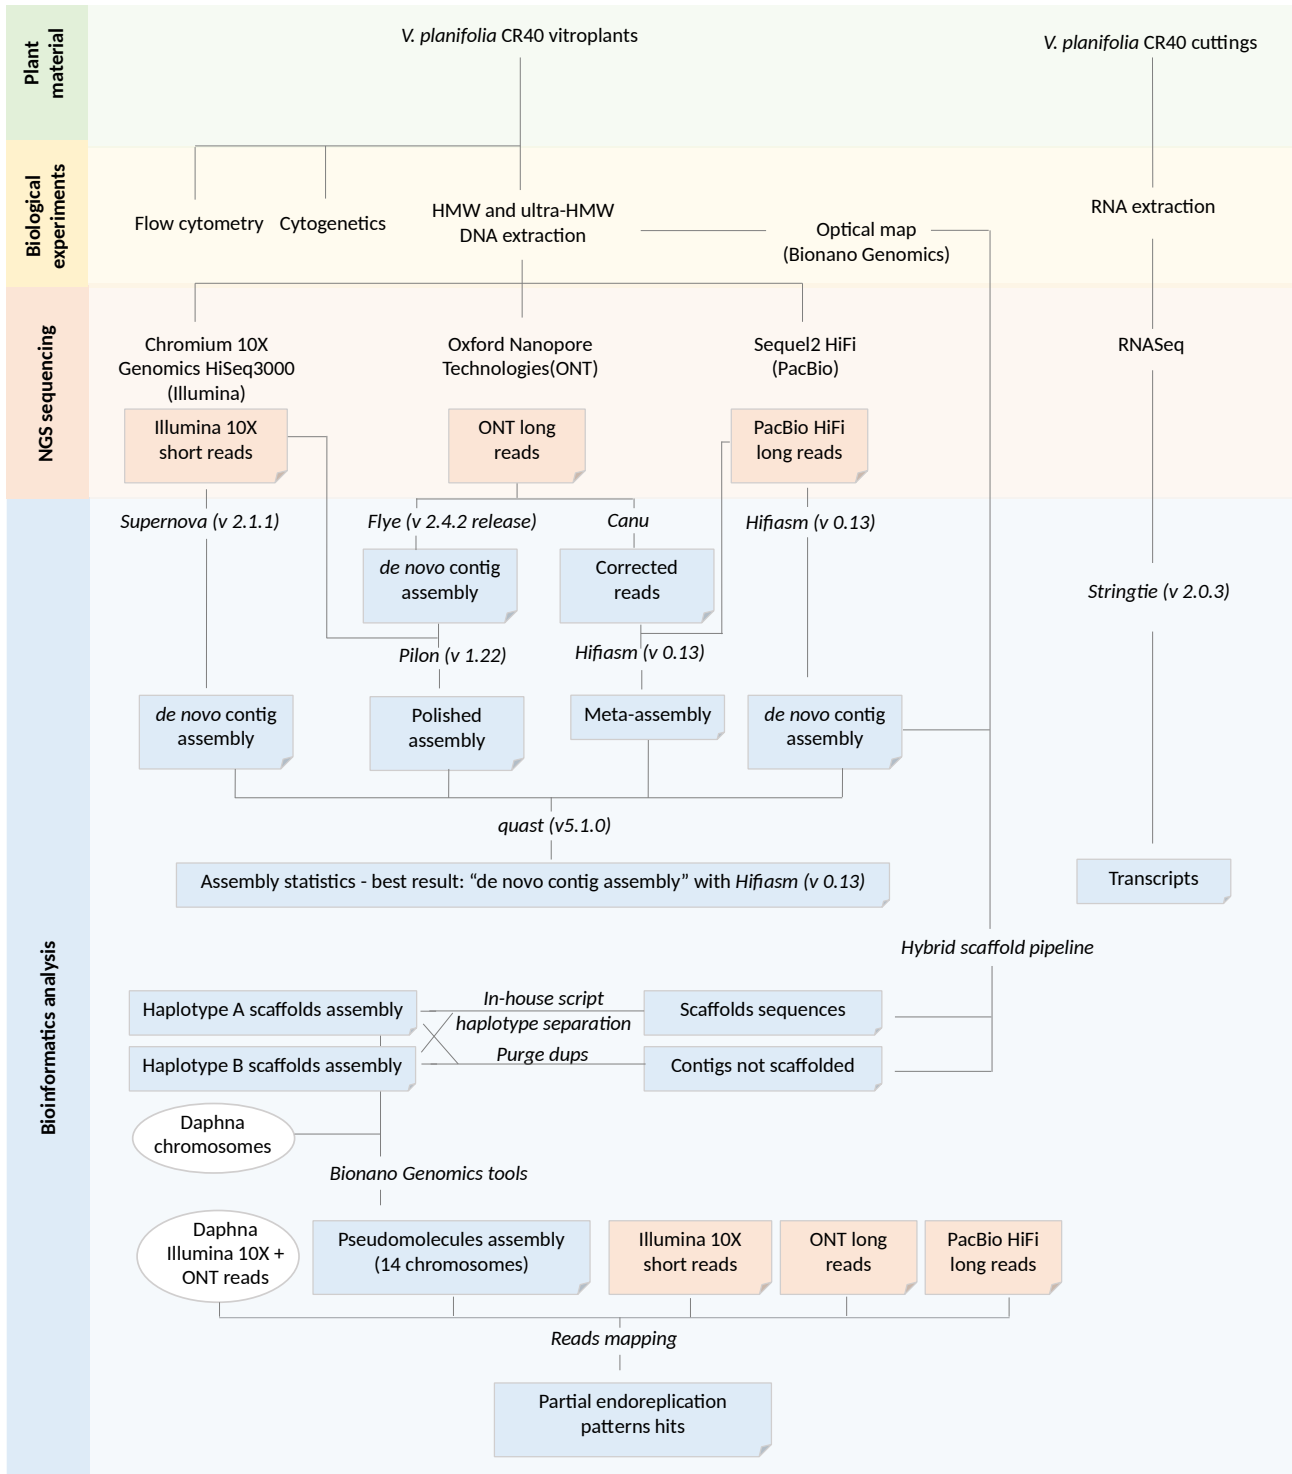

2  
 3 Supplemental Figure 1 Schematic representation of CR0040 genome sequencing strategy. Data  
 4 represented with white circles were retrieved from *V. planifolia* Daphna genome (Hasing et al,  
 5 2020).

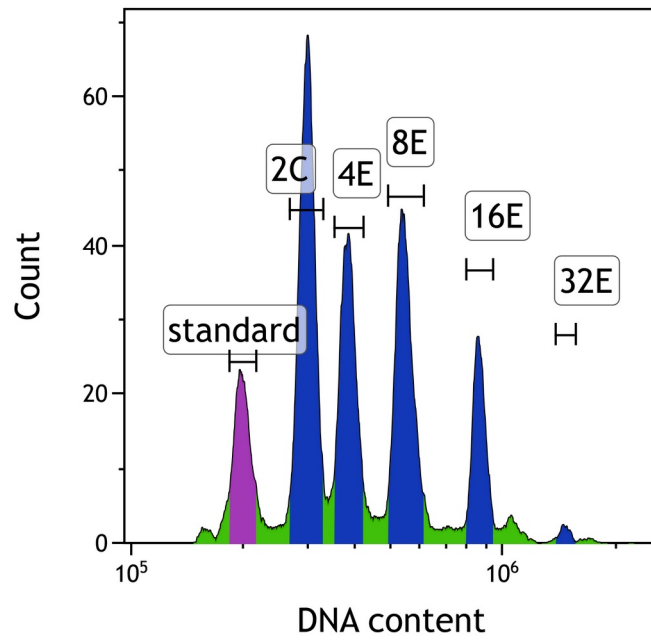

6 Supplemental Figure 2 Example of DNA content histogram of nodal tissue from *Vanilla planifolia*  
7 CR0040.

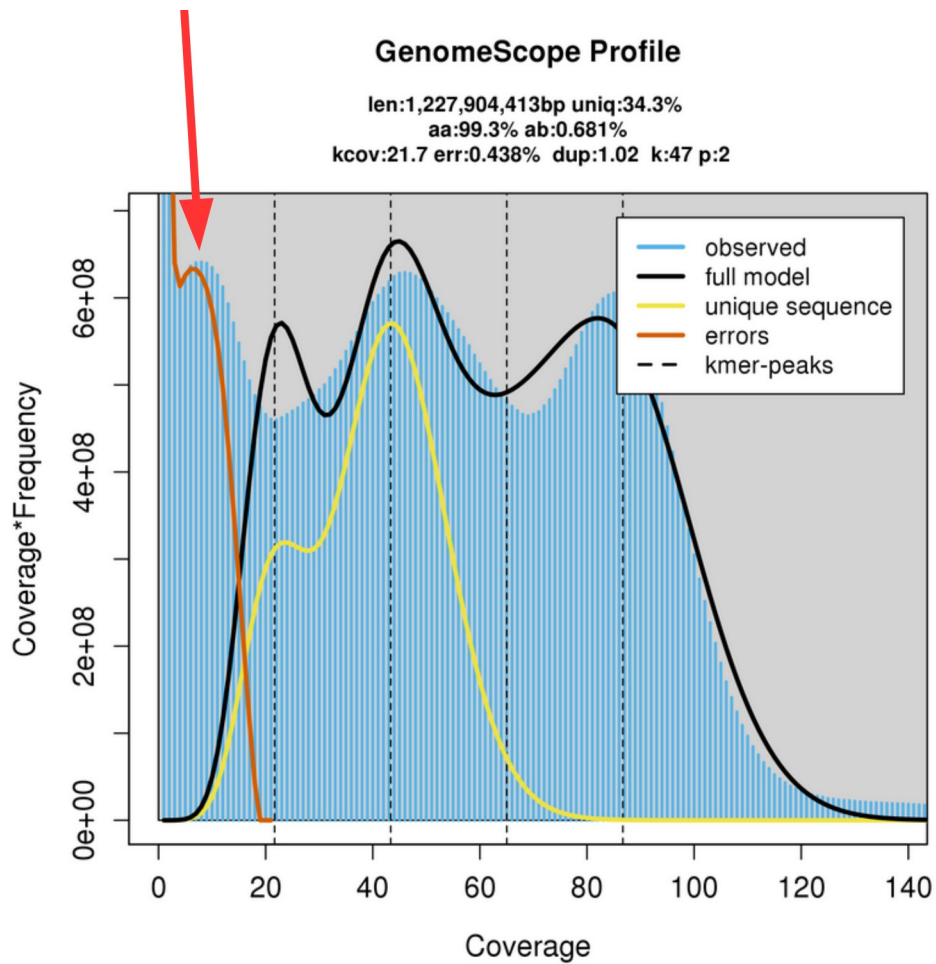

8 Supplemental Figure 3 GenomeScope2 k-mer profile of the CR0040 genome assembly  
9 The red arrow shows k-mers from the non-endoreplicated part of the CR0040 genome whose  
10 distribution is centered at 10X. The two k-mers distributions centered at 42X and 84X, represent the  
11 classical diploid distribution with the heterozygous and homozygous k-mer content.







13 Supplemental Figure 4 Synteny view of the two *V. planifolia* genomes.

14 A. Comparison of MCSanX allelic blocks of both CR0040 haplotypes A and B. B) Comparison of MCSanX allelic blocks of both CR0040  
15 haplotypes and of both Daphna haplotypes. C) Same as B) but it only shows syntenic relationships between the unknown random pseudomolecule of  
16 Daphna haplotype A (A0) and the CR0040 pseudomolecules in order to pinpoint improvement of CR0040 scaffolding. D) same as C) but with Daphna  
17 B0. Screenshots were done from <https://vanilla-genome-hub.cirad.fr/synvisio>.

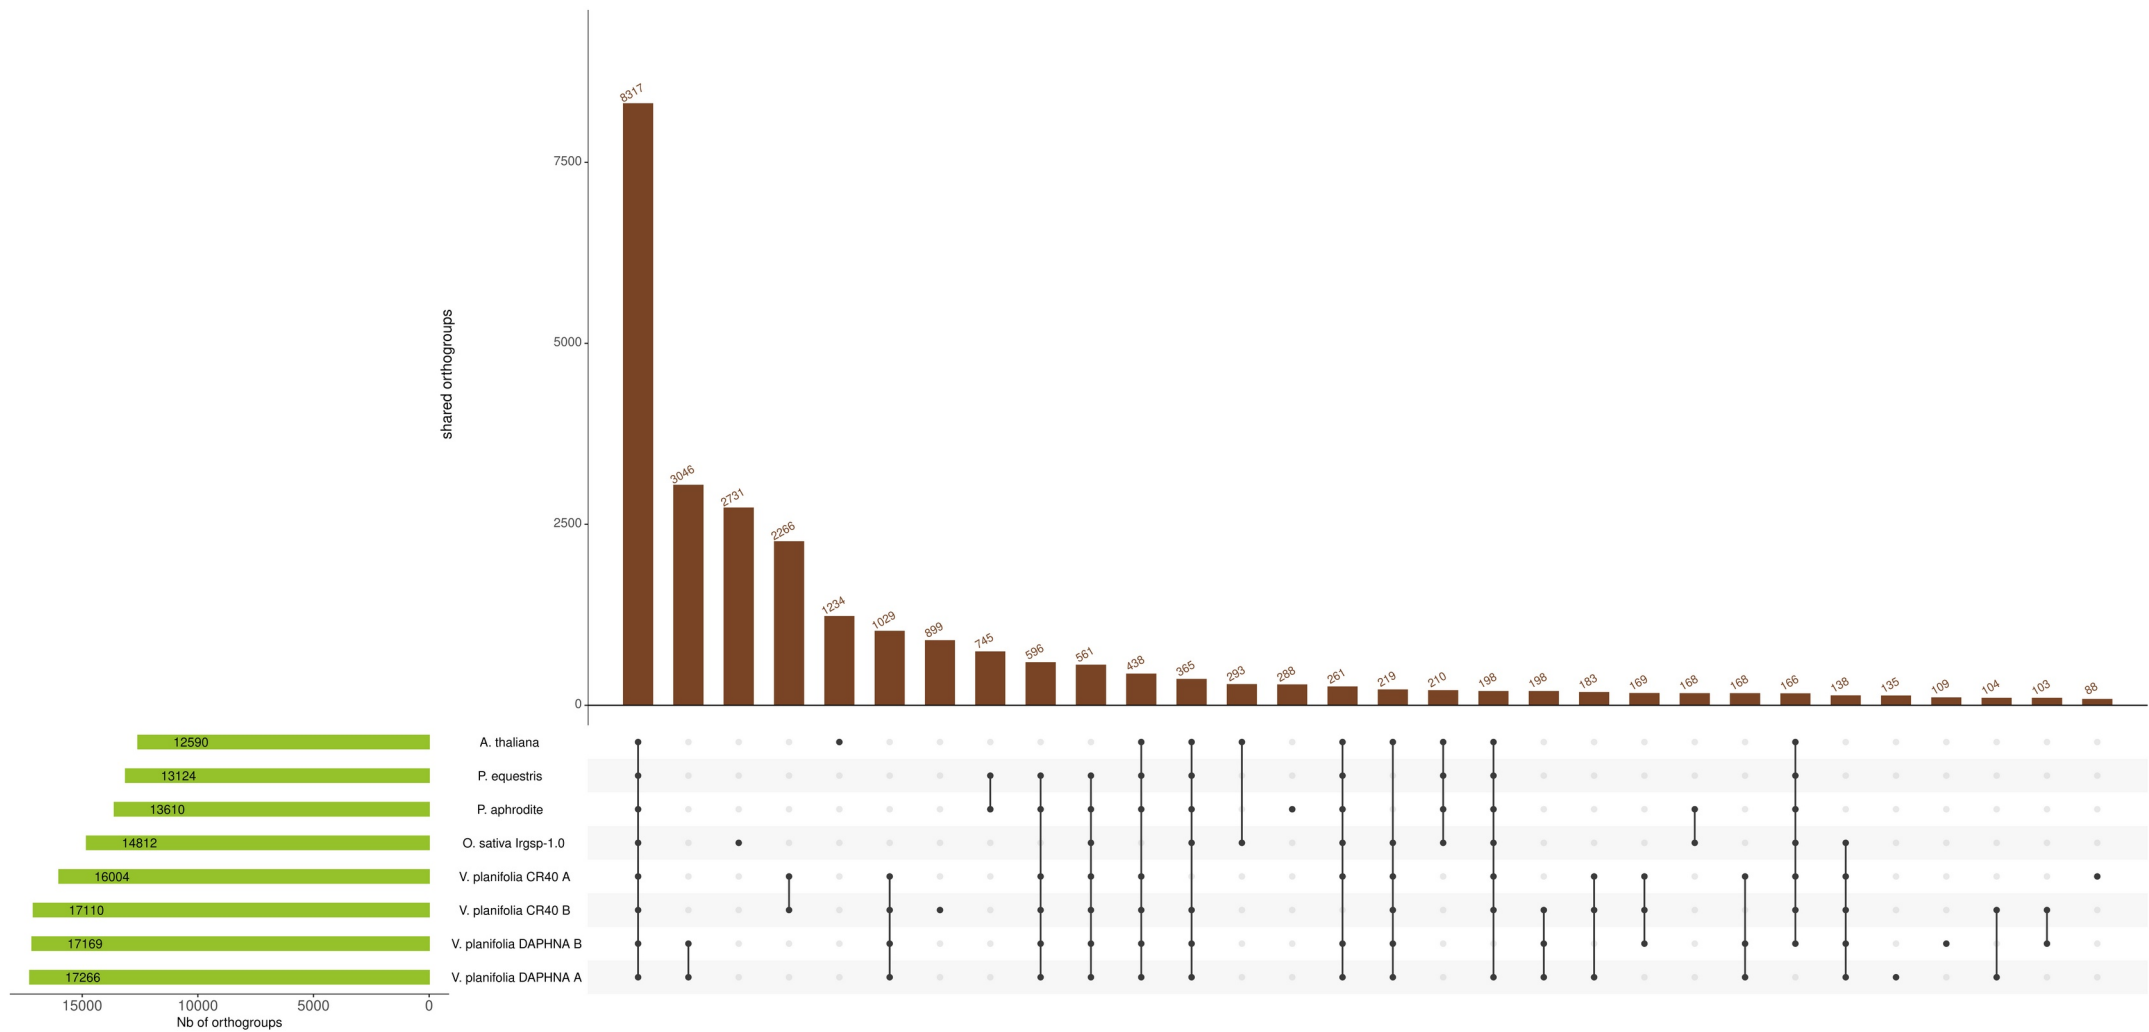

18 Supplemental Figure 5 UpSet plot of the inferred orthogroups.

19 The number of orthogroups identified with OrthoFinder for each species and *V. planifolia* haplotype is displayed inside horizontal green bars. Numbers  
 20 above vertical brown bars represent numbers of orthogroups shared by a given intersection of species/haplotypes illustrated downside each vertical bar.  
 21 For clarity reasons, only the 30 most frequent intersections were displayed on the plot (Nb, numbers).

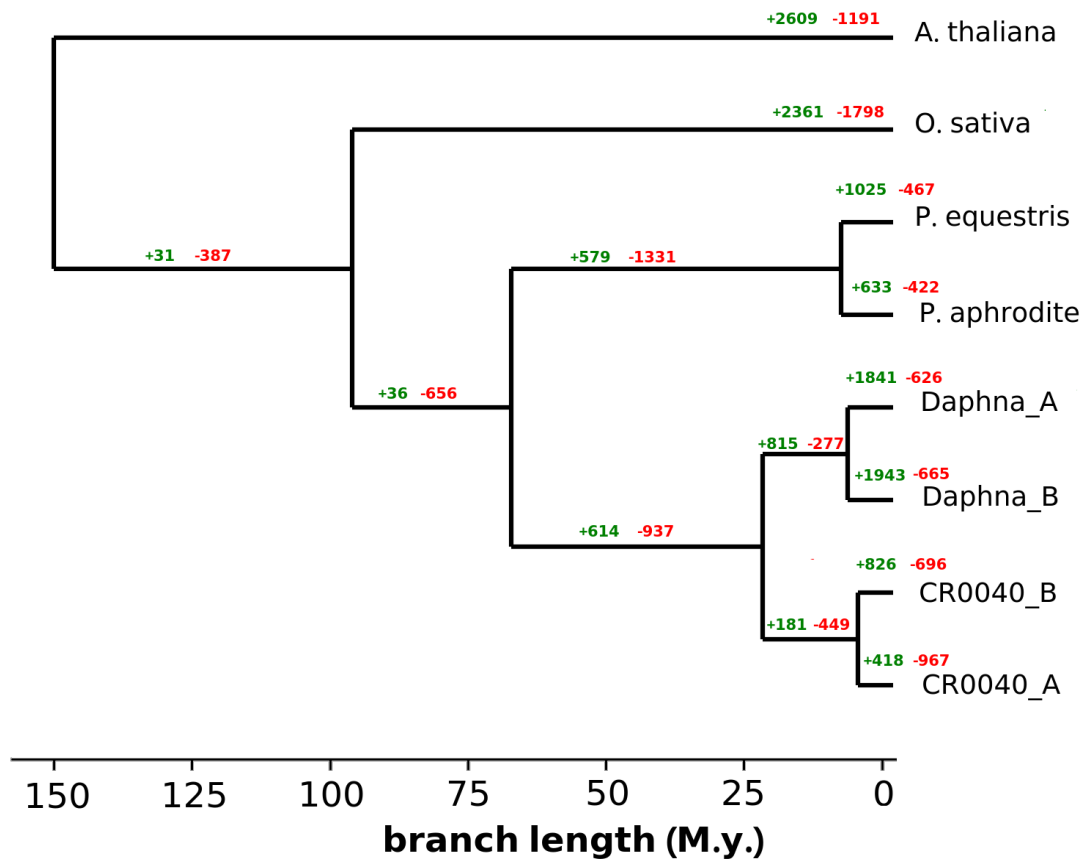

- 22 Supplemental Figure 6 Expansion and reduction of gene families in six proteomes.
- 23 Orthogroups from OrthoFinder on six proteomes (CR0040\_A, CR0040\_A, Daphna\_A,
- 24 *Phalaenopsis equestris*, *P. aphrodite*, *Arabidopsis thaliana*, *Oryza sativa*) were analyzed with
- 25 CAFE. The values represent the number of genes gained/lost.

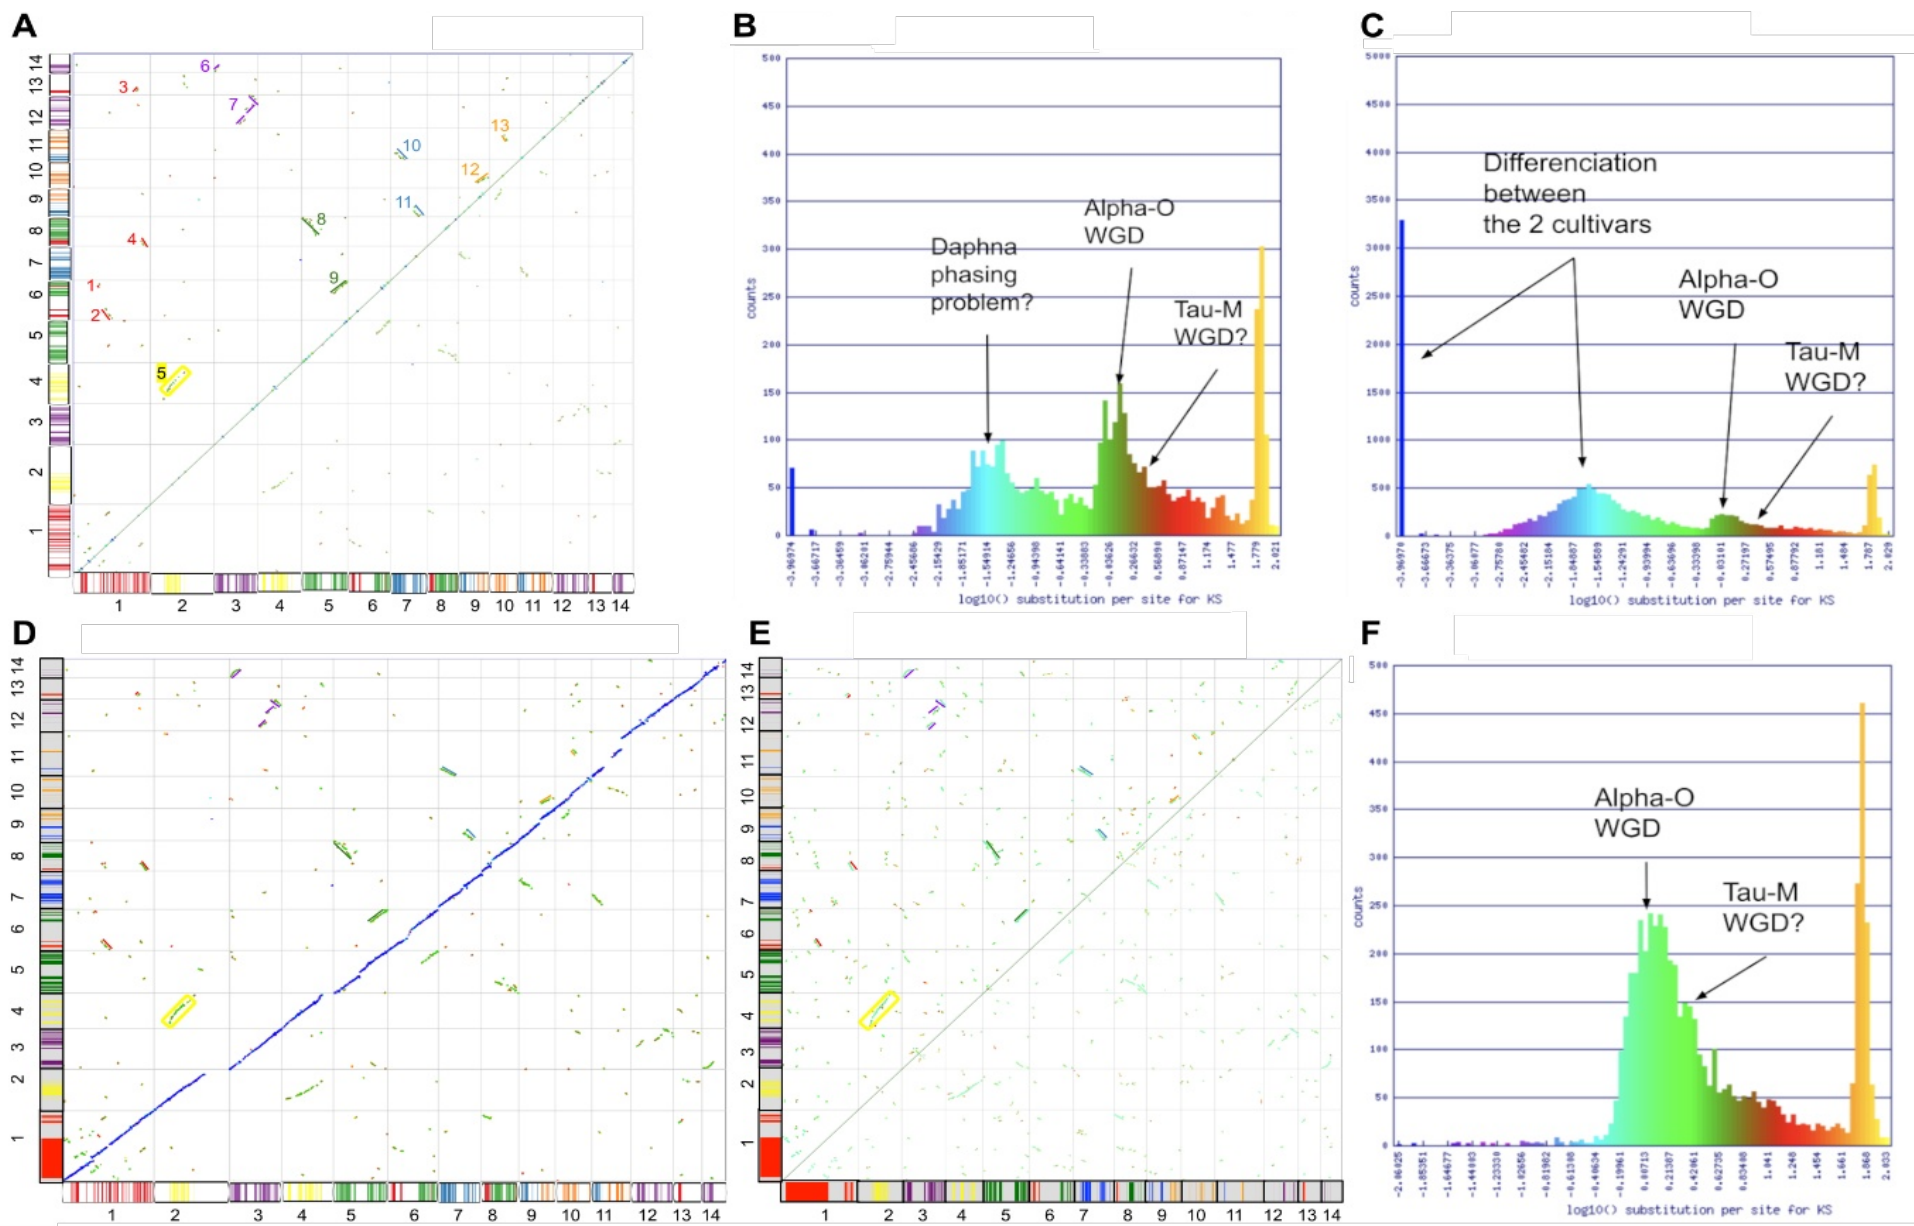

27 Supplemental Figure 7 Synmap pairwise genome synteny analyses between CR0040 and *Daphna* cultivars and between themselves.  
28 Haplotype A syntenic comparisons of *Daphna* CDS against themselves (A, B, see details in <https://genomeevolution.org/r/1jei9>), between  
29 CR0040 and *Daphna* cultivars (C, D, see details in <https://genomeevolution.org/r/1jeid>) and of CR0040 against itself (E, F, see details in  
30 <https://genomeevolution.org/r/1j9ym>) were visualized with dotplots (A, D, E) and histograms of Ks values (B, C, F). *Daphna* karyotype painted  
31 according six pairs of duplicated regions illustrating the pan-orchid  $\alpha^o$  WGD of Figure 4 (Hasing et al., 2020) has been cut out and positioned  
32 below the corresponding chromosomes of the dotplots (A, D). 13 paralog blocks were then projected onto the diagonals. Furthermore, using  
33 reciprocal best hits, the *Daphna* karyotype could be transferred to CR0040 (D, E).

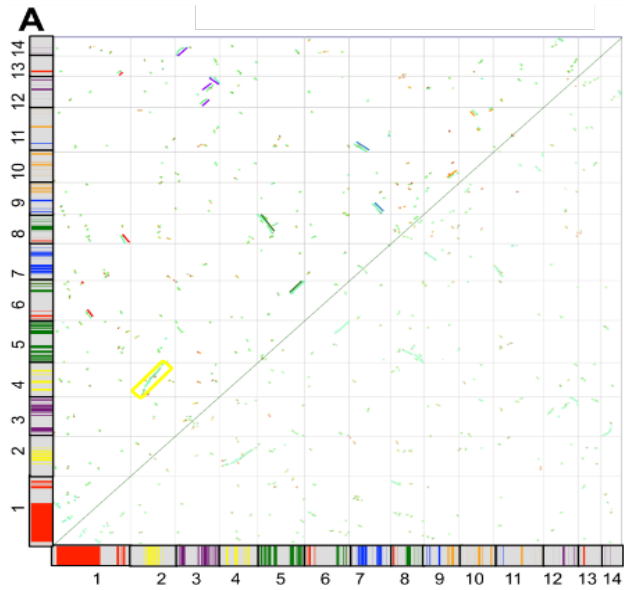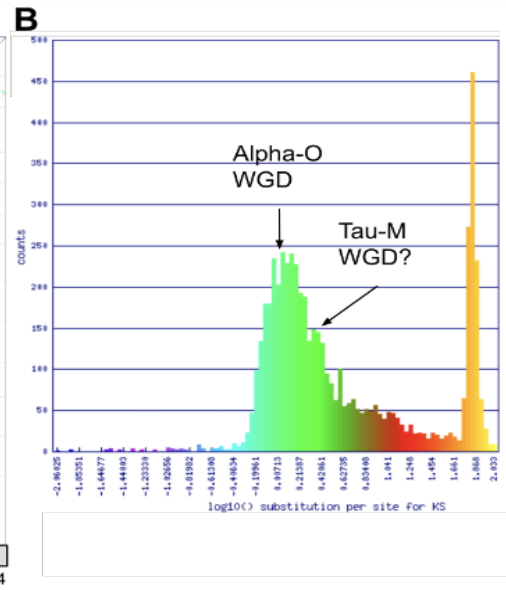

**D**

|      |               |
|------|---------------|
| L01  | VANPL_A_00001 |
| L02  | VANPL_A_00001 |
| L03  | VANPL_A_00003 |
| L04  | VANPL_A_00007 |
| L05a | VANPL_A_00003 |
| L05b | VANPL_A_00003 |
| L06  | VANPL_A_00003 |
| L07  | VANPL_A_00013 |
| L08a | VANPL_A_00002 |
| L08b | VANPL_A_00008 |
| L09  | VANPL_A_00007 |
| L10a | VANPL_A_00013 |
| L10b | VANPL_A_00001 |
| L11  | VANPL_A_00009 |
| L12  | VANPL_A_00011 |
| L13  | VANPL_A_00001 |
| L14  | VANPL_A_00001 |
| L15  | VANPL_A_00008 |
| L16  | VANPL_A_00003 |
| L17  | VANPL_A_00001 |
| L18  | VANPL_A_00005 |
| L19  | VANPL_A_00012 |

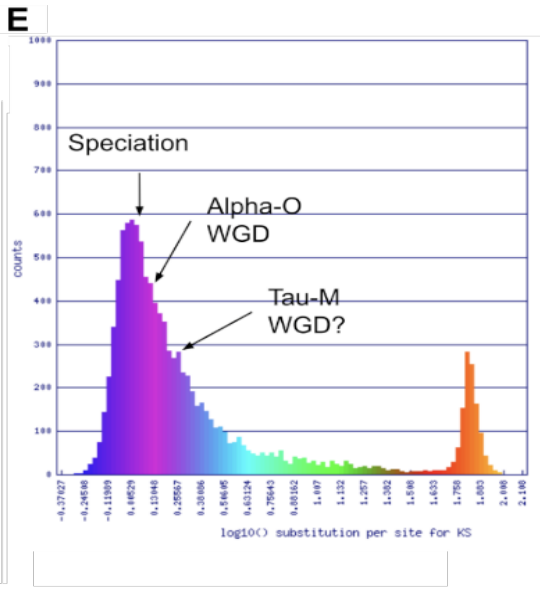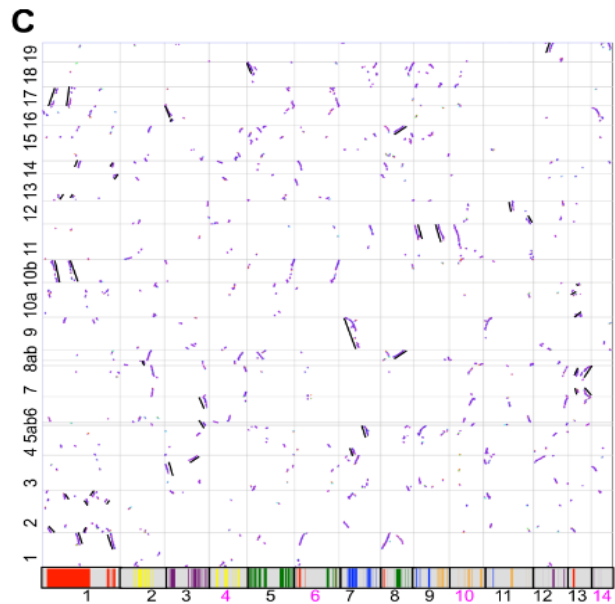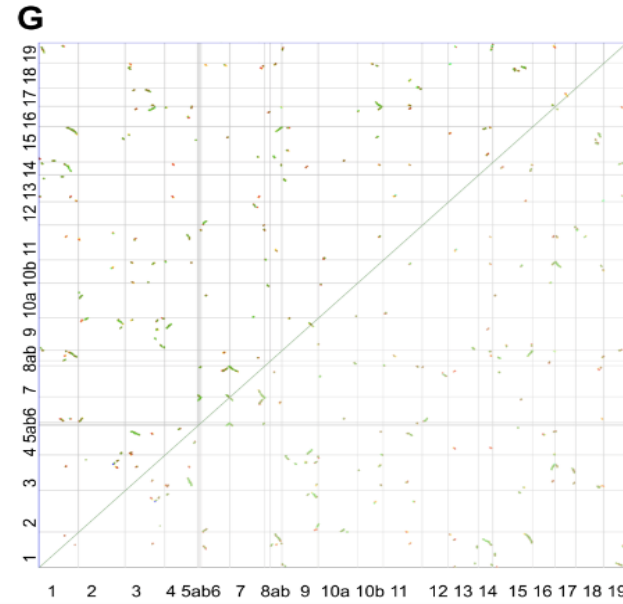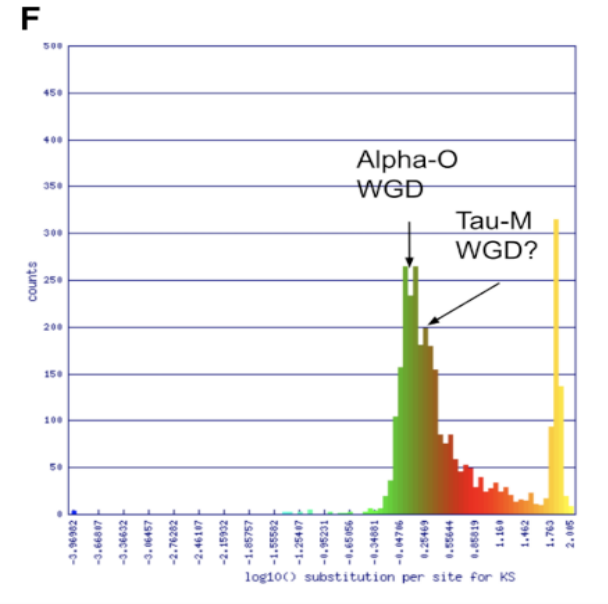

35 Supplemental Figure 8 Synmap pairwise genome synteny analyses between CR0040 *V. planifolia* and *P. aphrodite* and between themselves.  
36 Haplotype A syntenic comparisons of CR0040 CDS against themselves (A, B, see details in <https://genomeevolution.org/r/1j9ym>), between  
37 CR0040 and *P. aphrodite* genome (C, D, E, see details in <https://genomeevolution.org/r/1jekr>) and *P. aphrodite* genome itself (G, F, see details in  
38 <https://genomeevolution.org/r/1jekt>) were visualized with dotplots (A, C, G), histograms of Ks values (B, E, F) and correspondence between the  
39 chromosomes of the two species was indicated according to Syntenic Path Assembly (D; SPA option; <https://genomeevolution.org/r/1jjmm>). The  
40 CR0040 karyotype comes from the transfer of that of *Daphna* (Hasing et al., 2020) using reciprocal best hits. It has been cut out and positioned  
41 below the corresponding chromosomes of dotplots (A, C). Thus, six pairs of duplicated regions illustrating the pan-orchid  $\alpha^o$  WGD allowed to  
42 project paralog blocks onto the diagonals (A). The orthologous blocks between CR0040 and *P. aphrodite* were highlighted with black lines (C)  
43 according to SPA results (D).

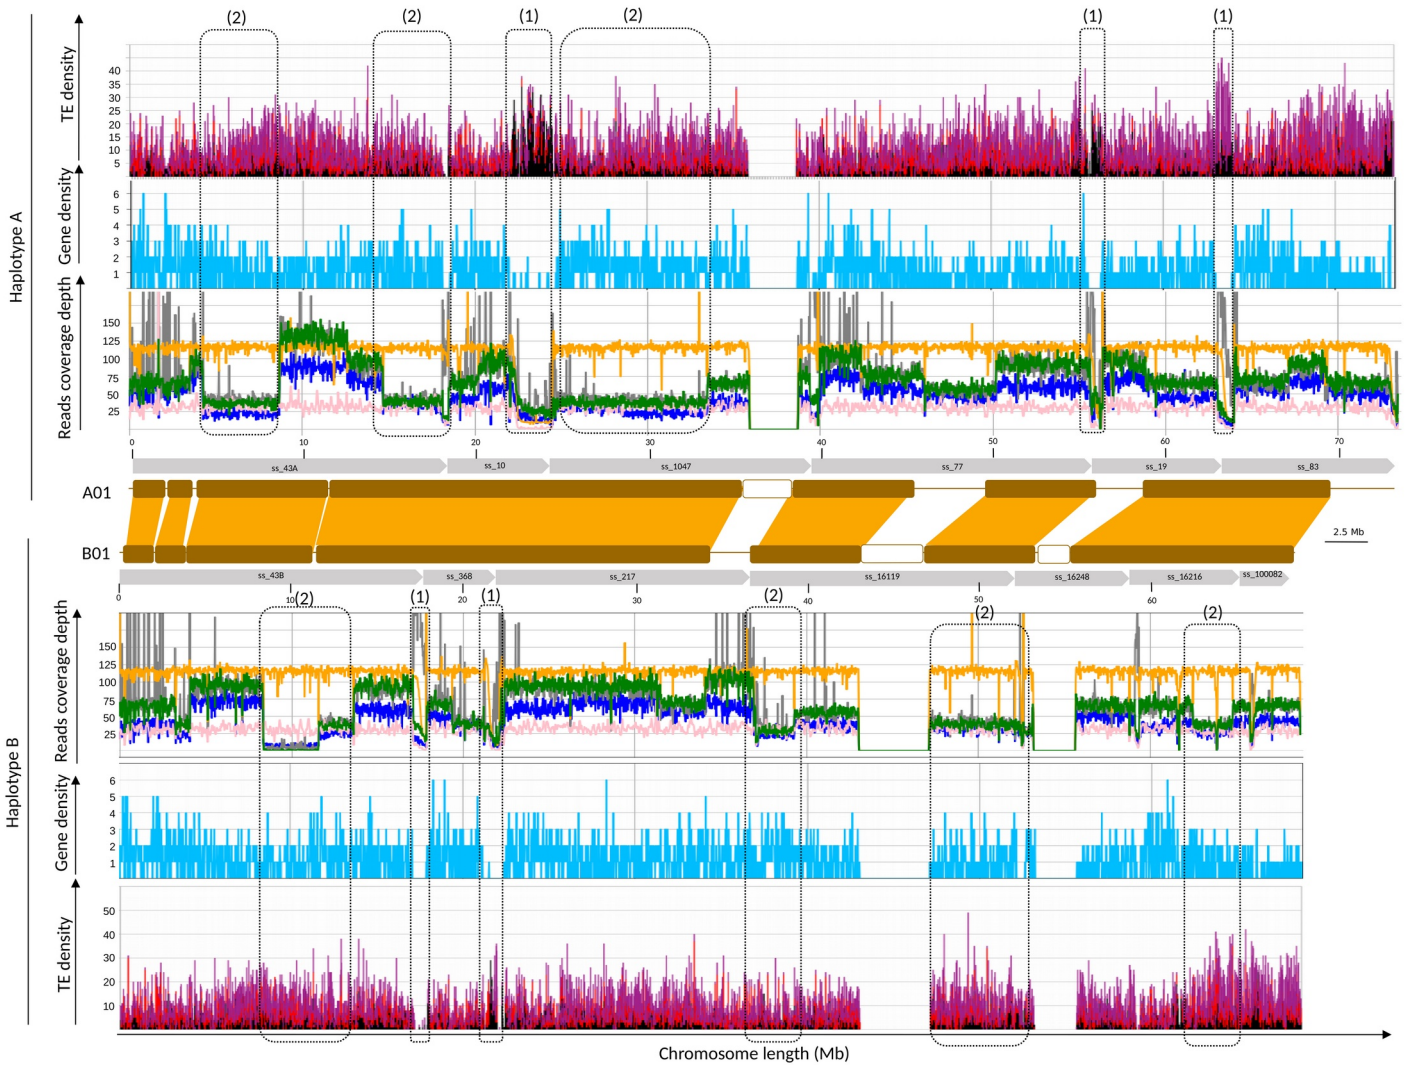

44 Supplemental Figure 9 Sequencing depth along the CR0040 chromosomes obtained by  
 45 mapping Daphna Illumina (yellow) and ONT (pink) reads, CR0040 PacBio Hifi (blue),  
 46 Nanopore (green) and Illumina (grey) reads on the CR0040 assembly. Synteny between  
 47 homologous chromosomes are represented by central boxes. Gaps (N stretches) explaining  
 48 sudden drops in sequencing depth are shown with white blocks. (1) Pattern 1 corresponds to  
 49 low level of sequencing depth for all data. (2) Pattern 2 corresponds to inverted level of  
 50 sequencing depth for CR0040 between haplotypes A and B, and constant level of sequencing  
 51 depth for both Daphna haplotypes. Gene and retrotransposons distributions along the  
 52 chromosomes are represented by a blue line chart and a stacked histogram (copia: red, gypsy:  
 53 purple, other retrotransposons: black) respectively.



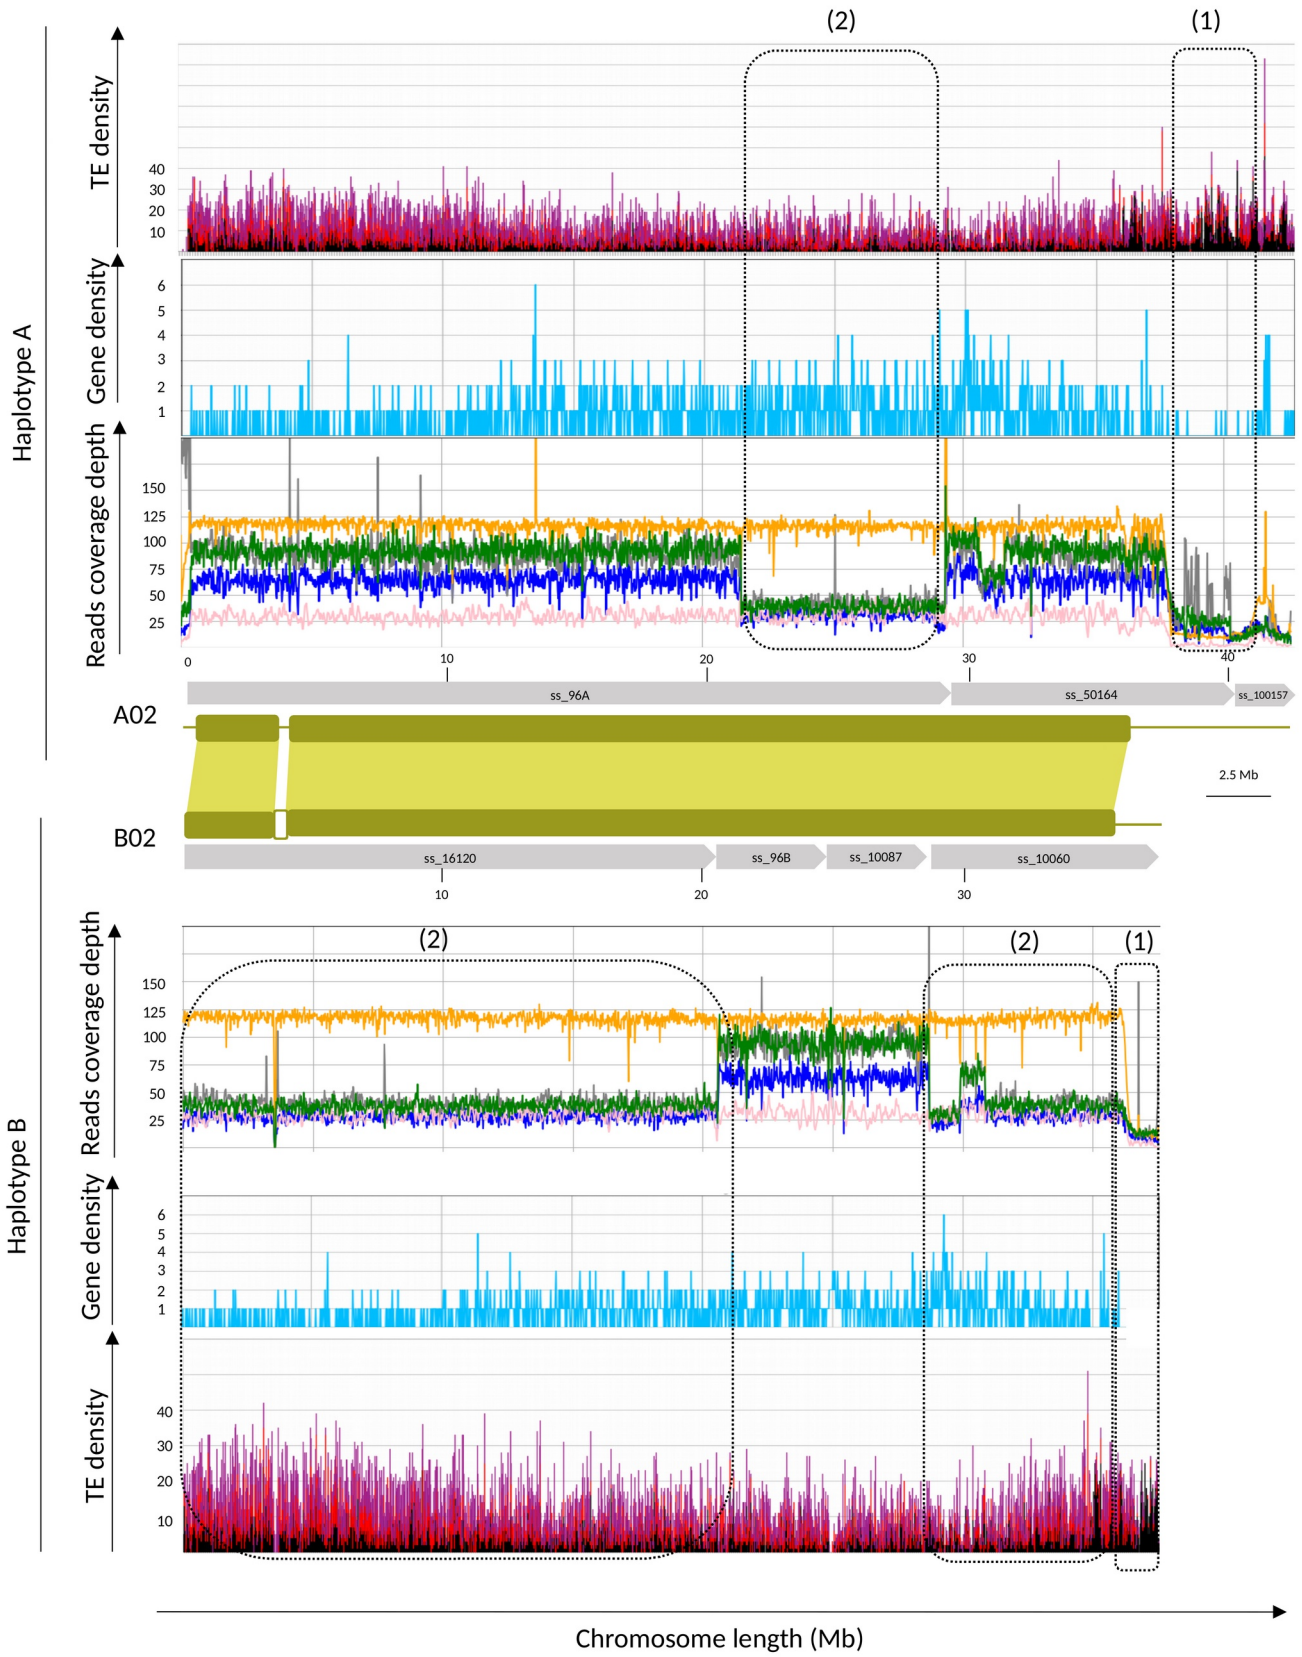

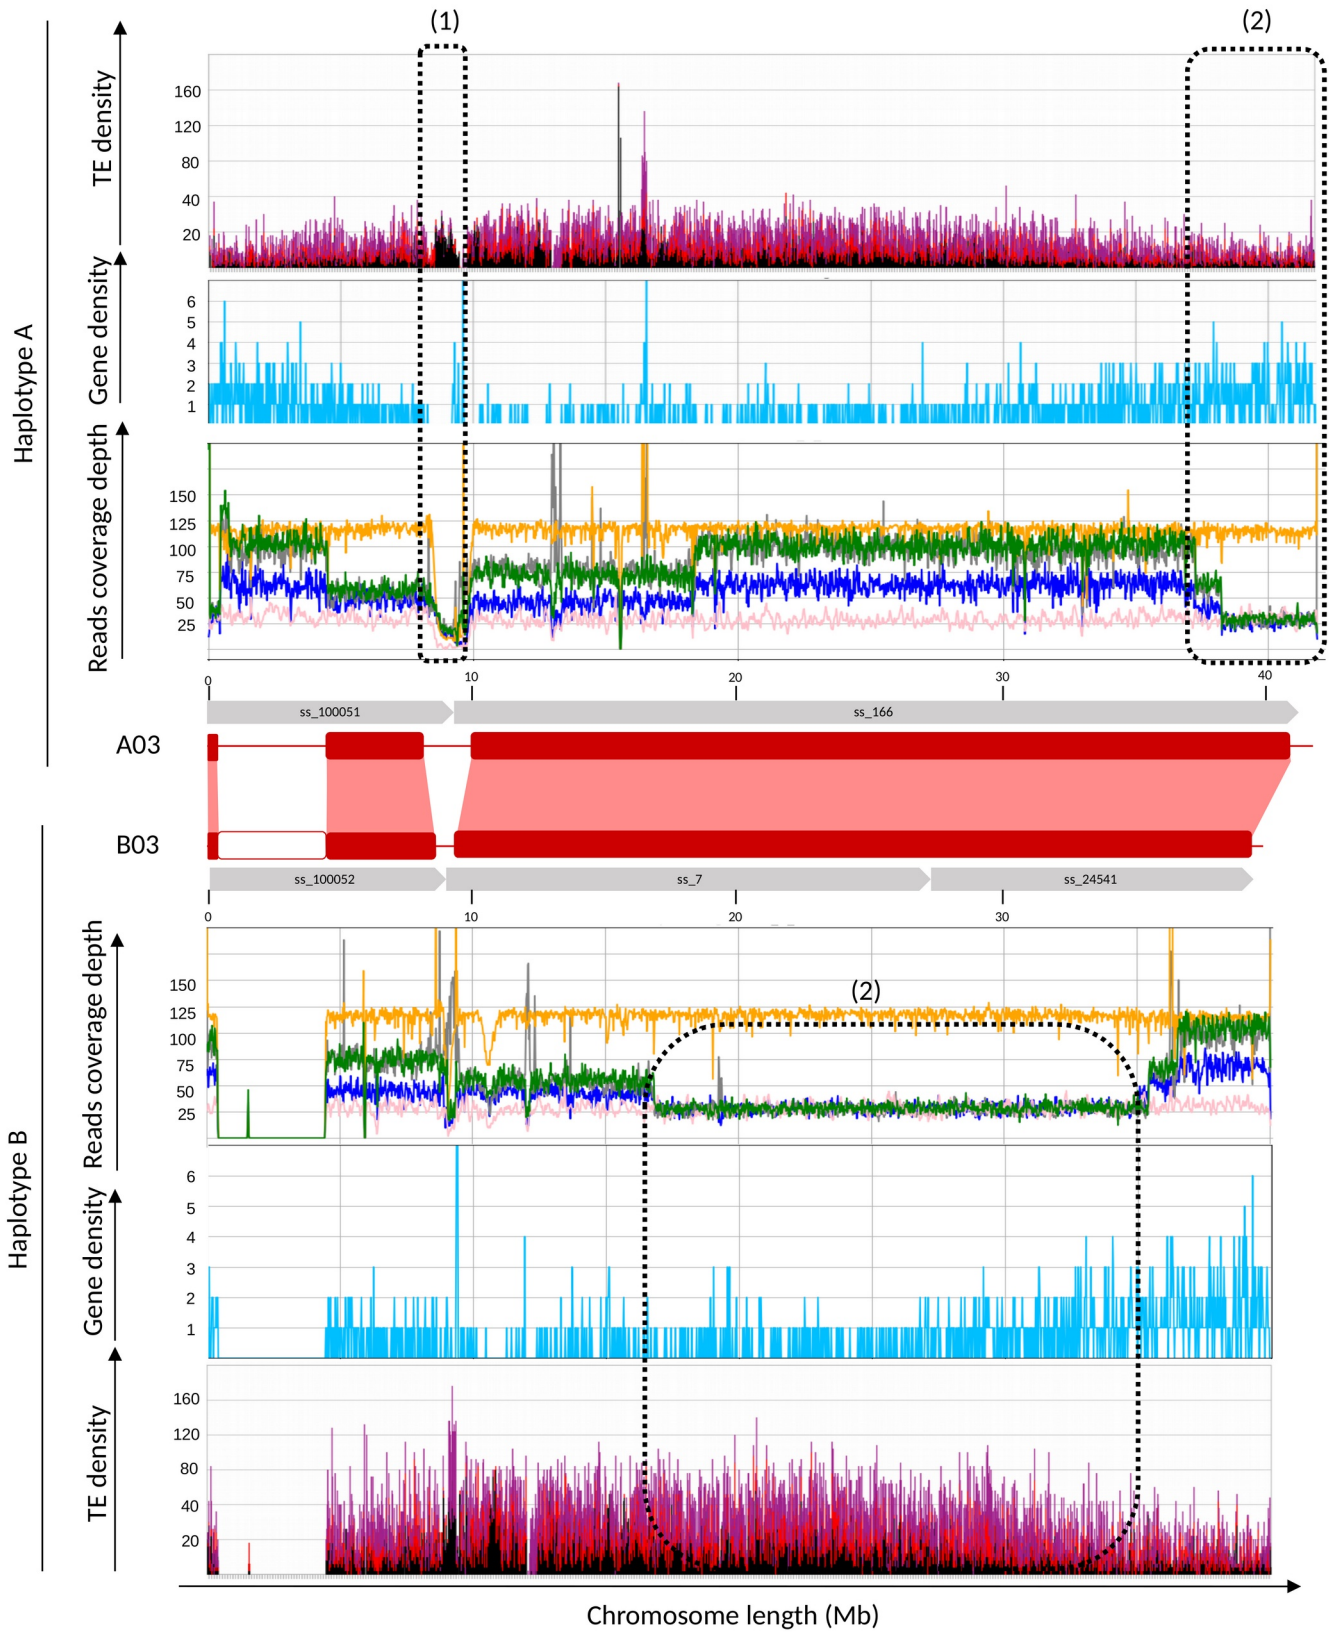

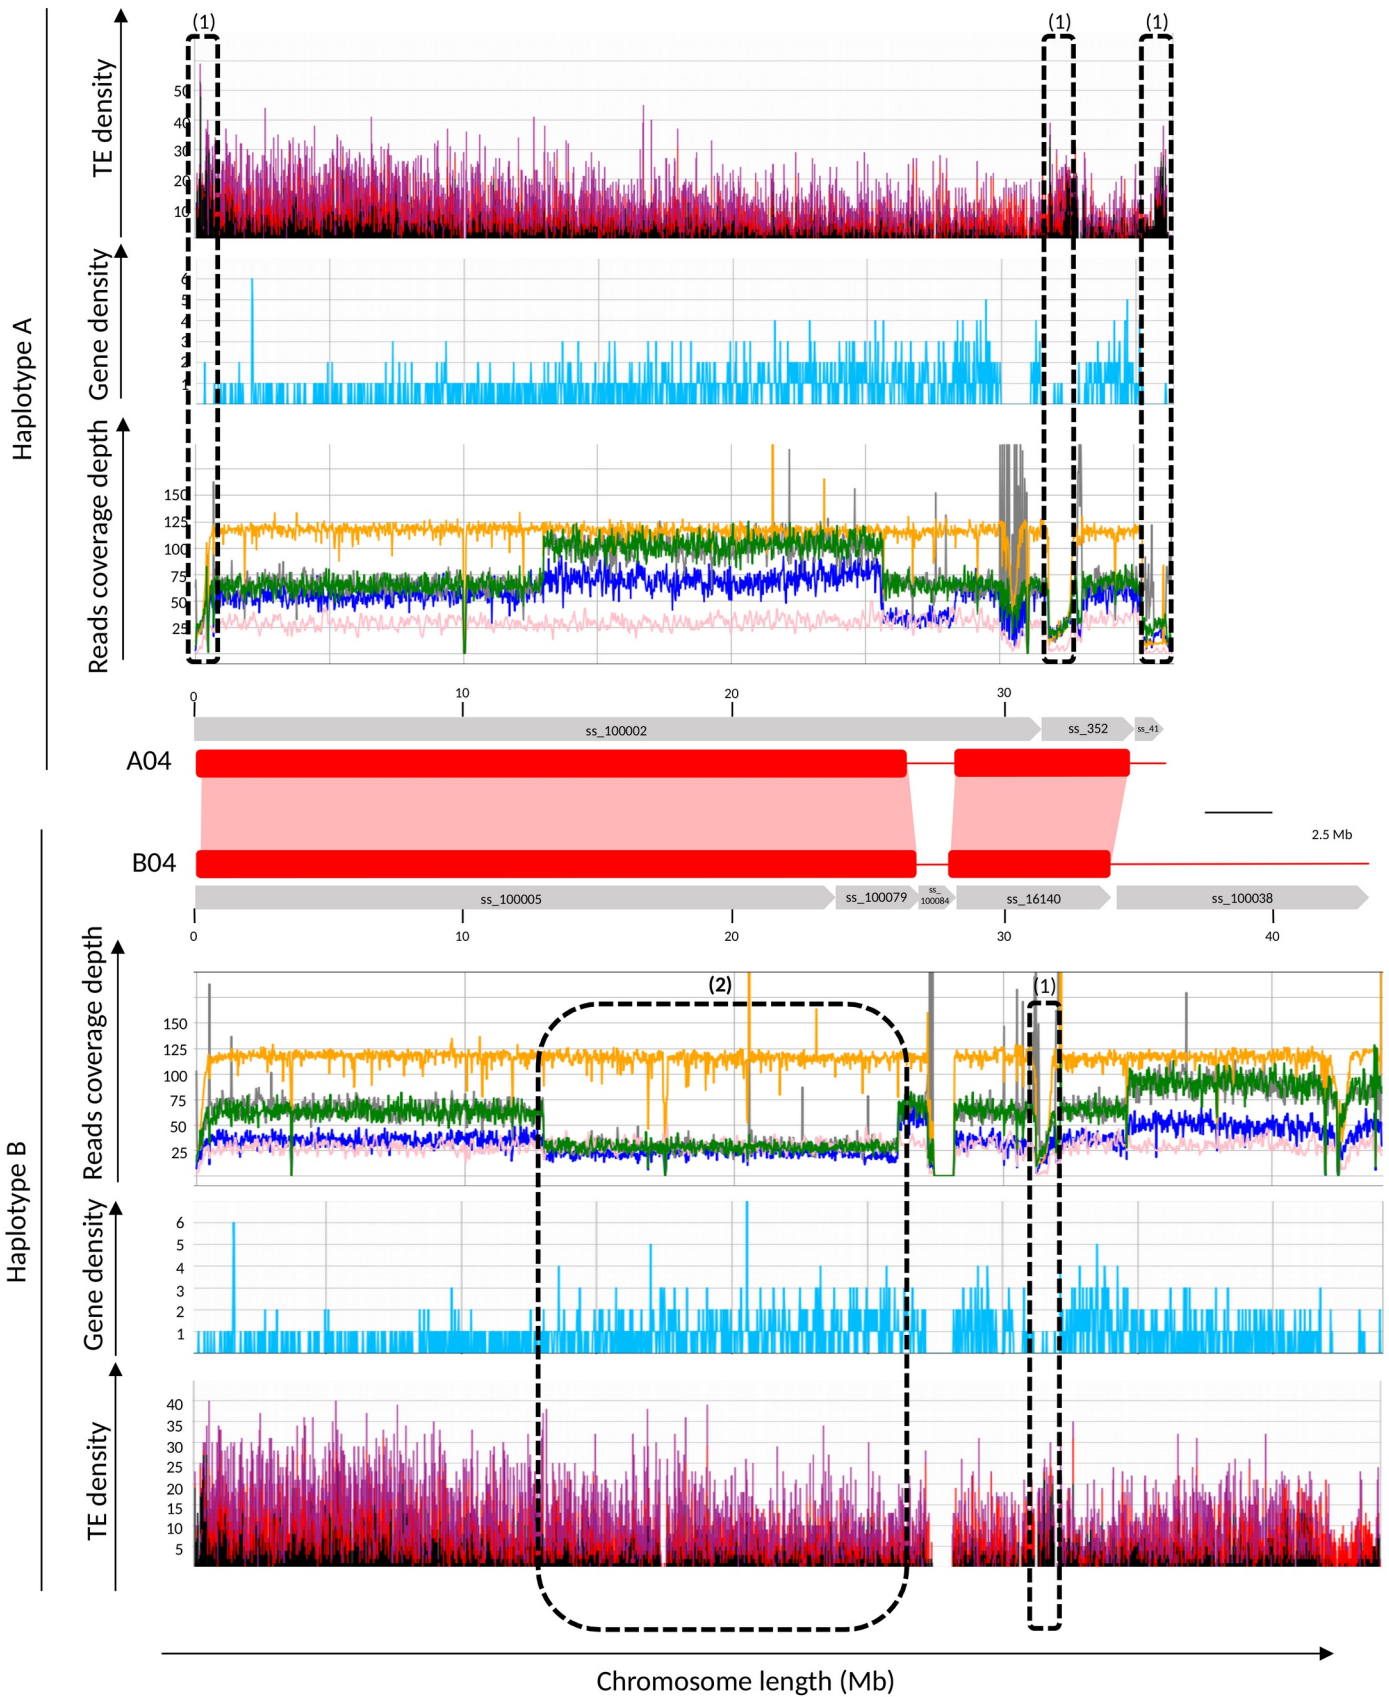



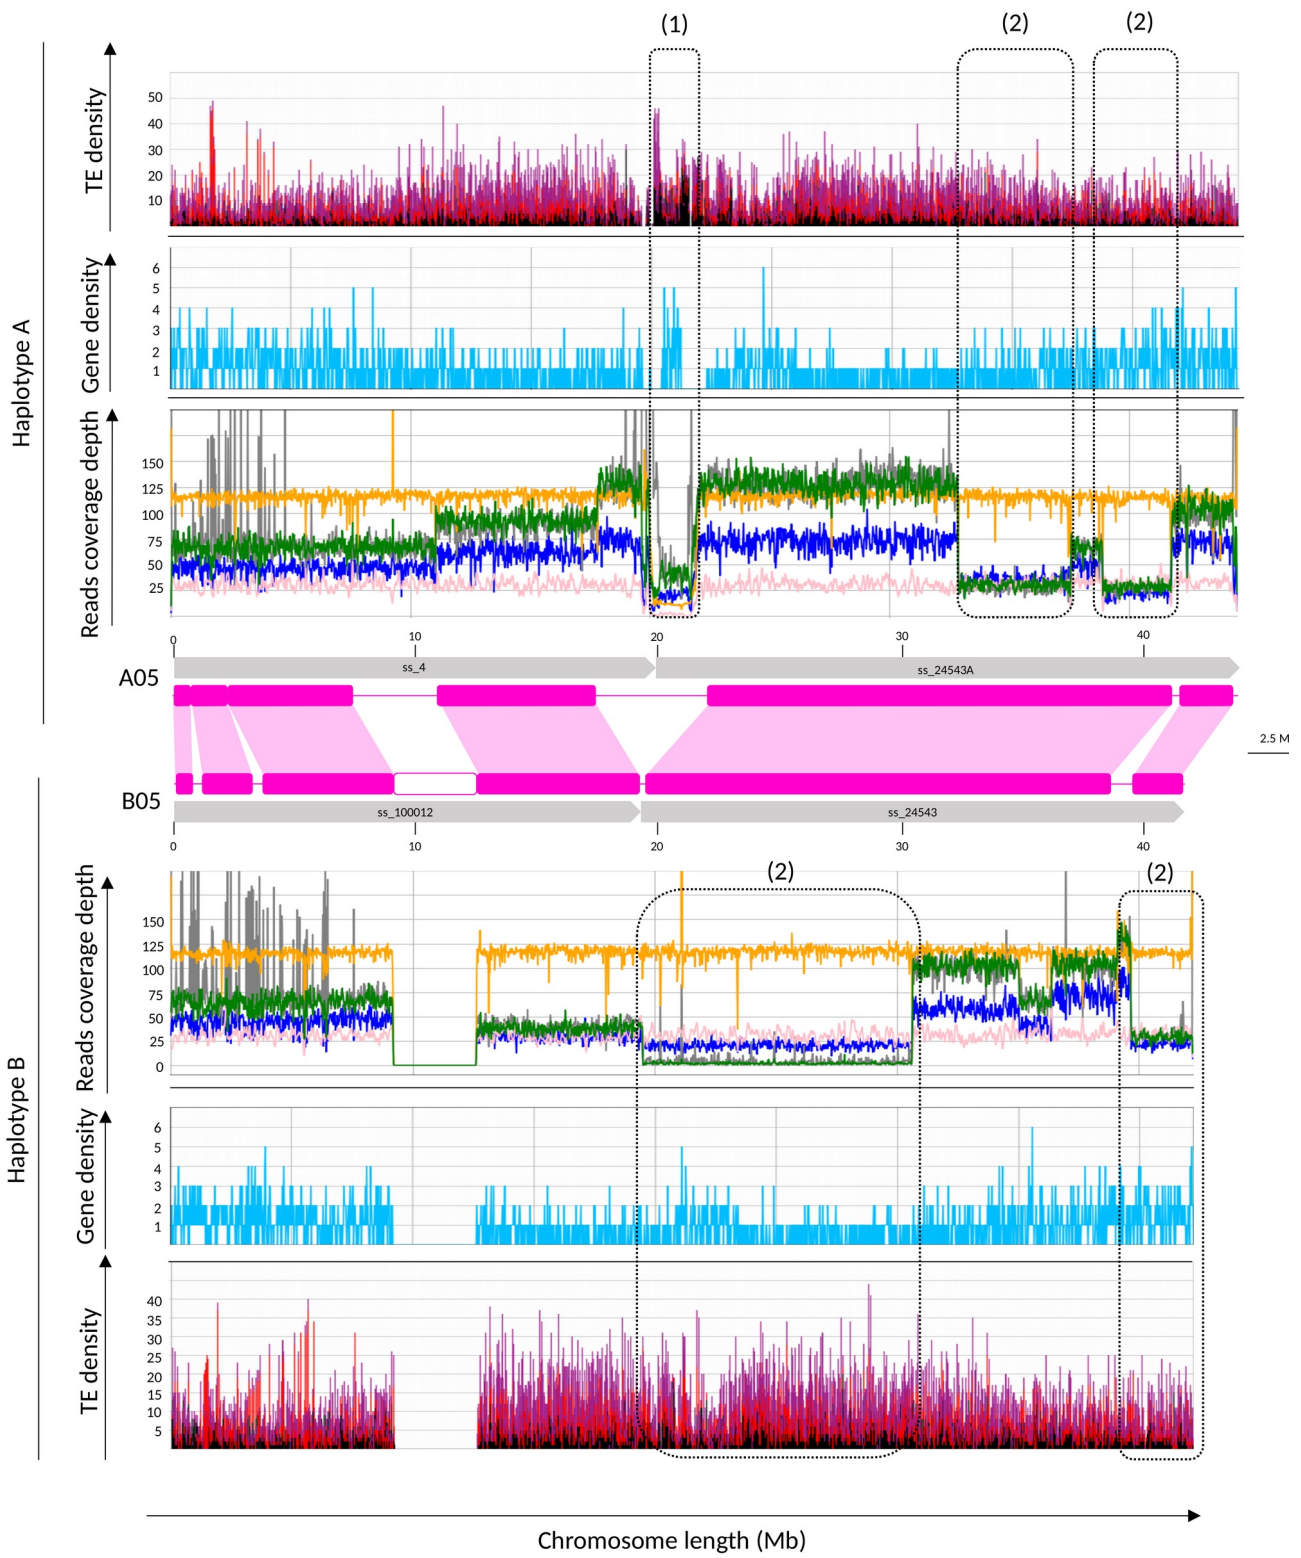

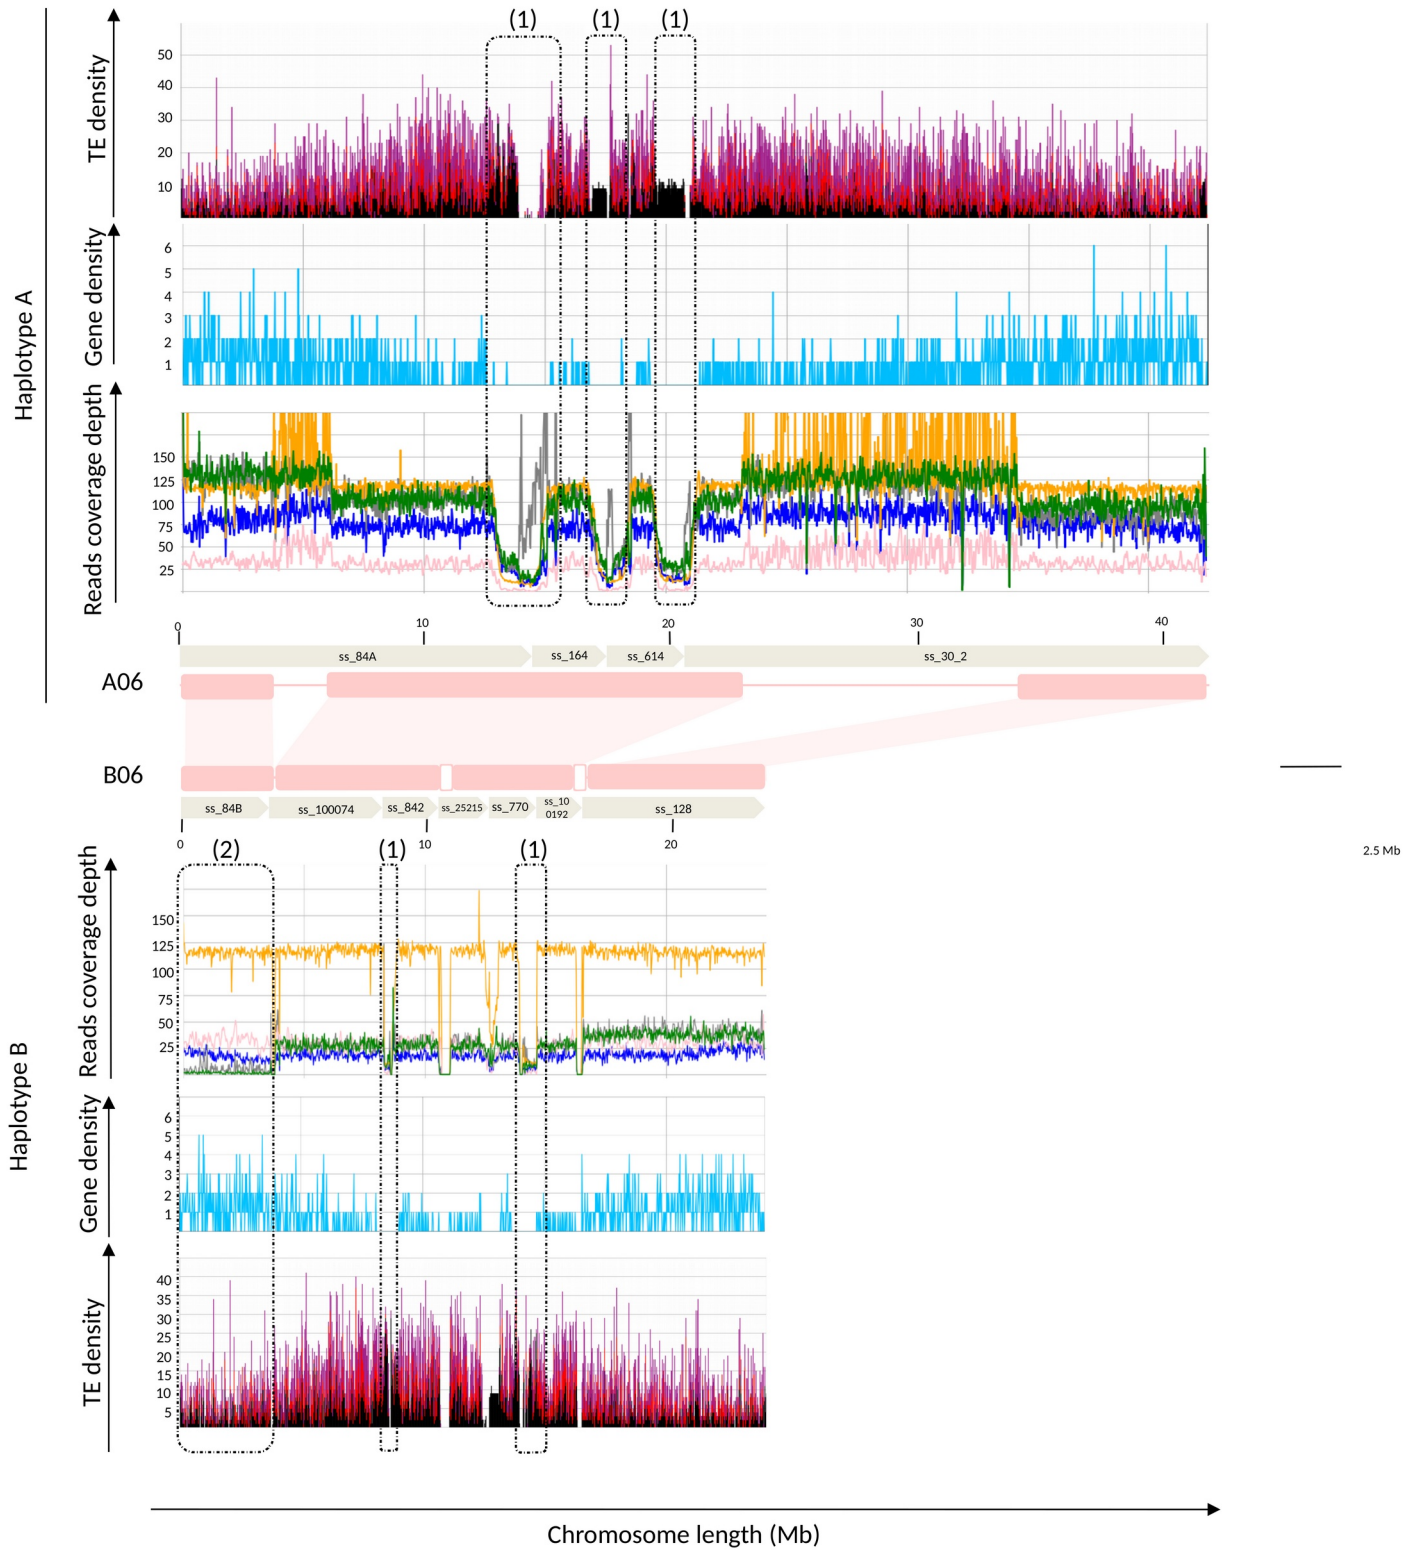

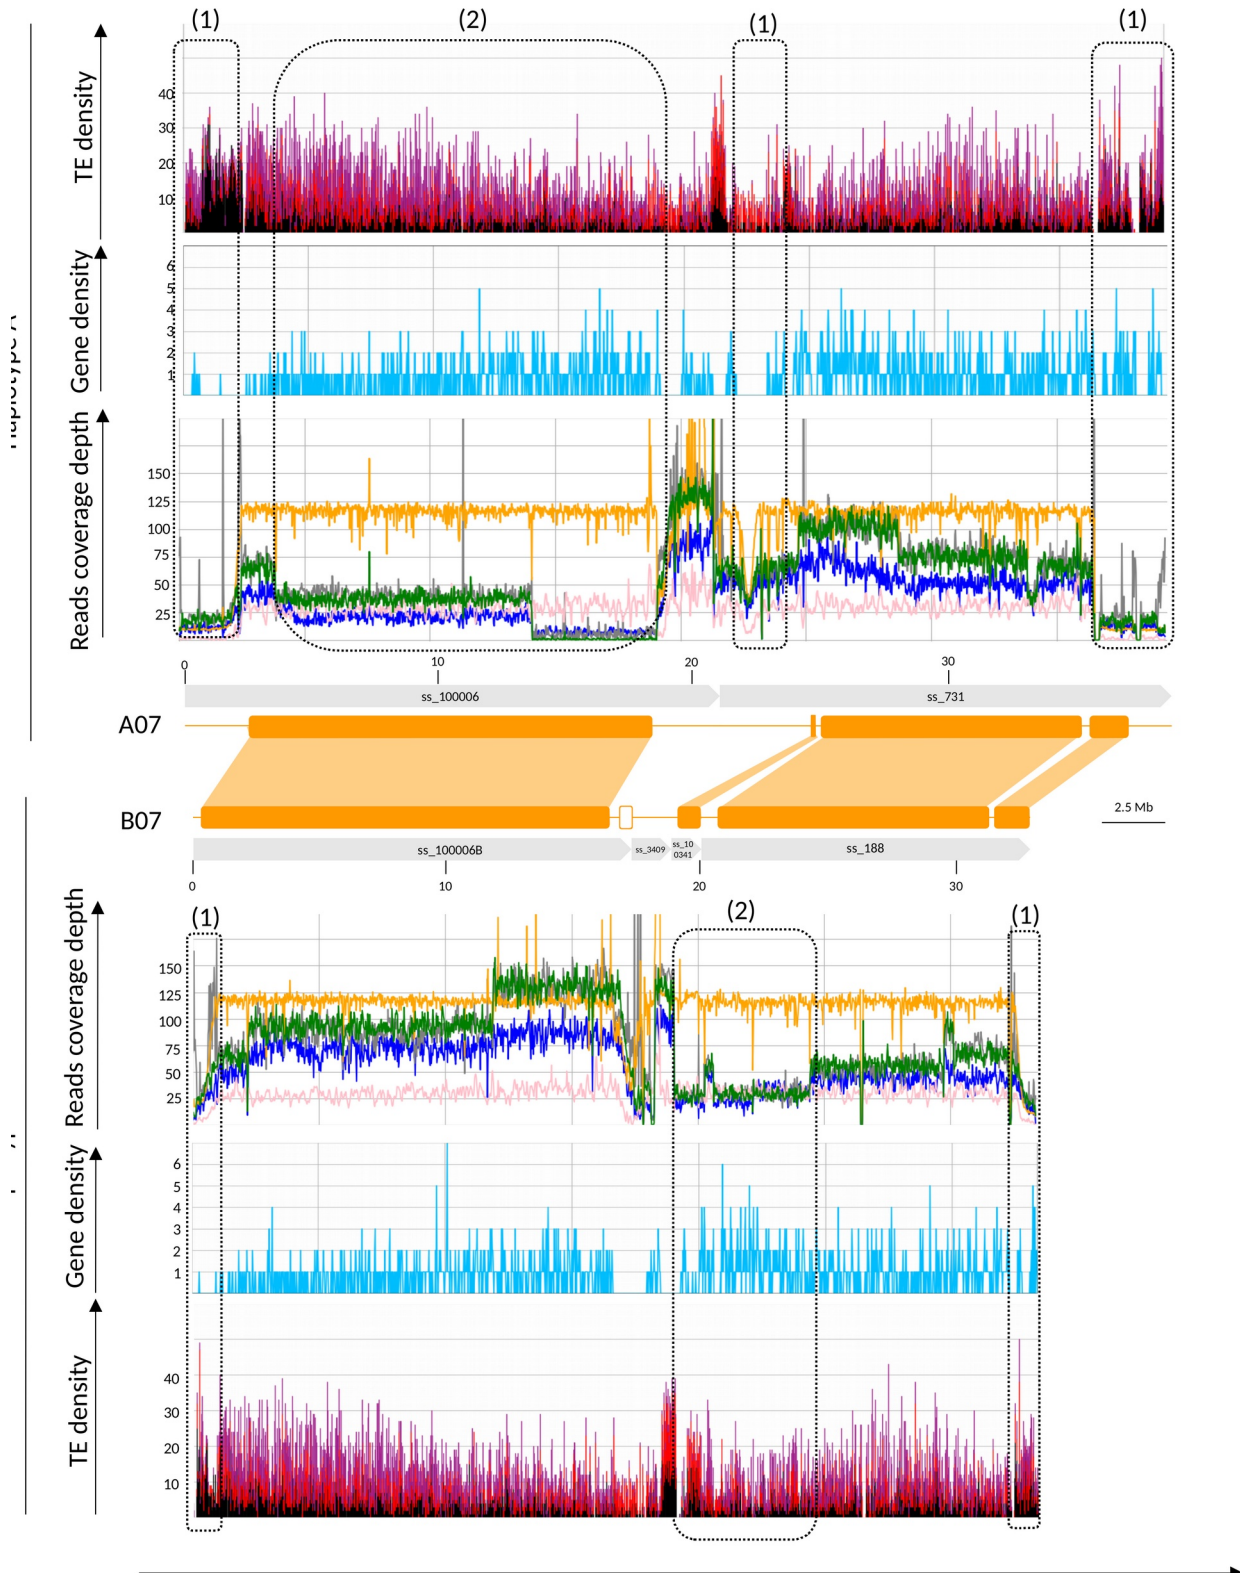



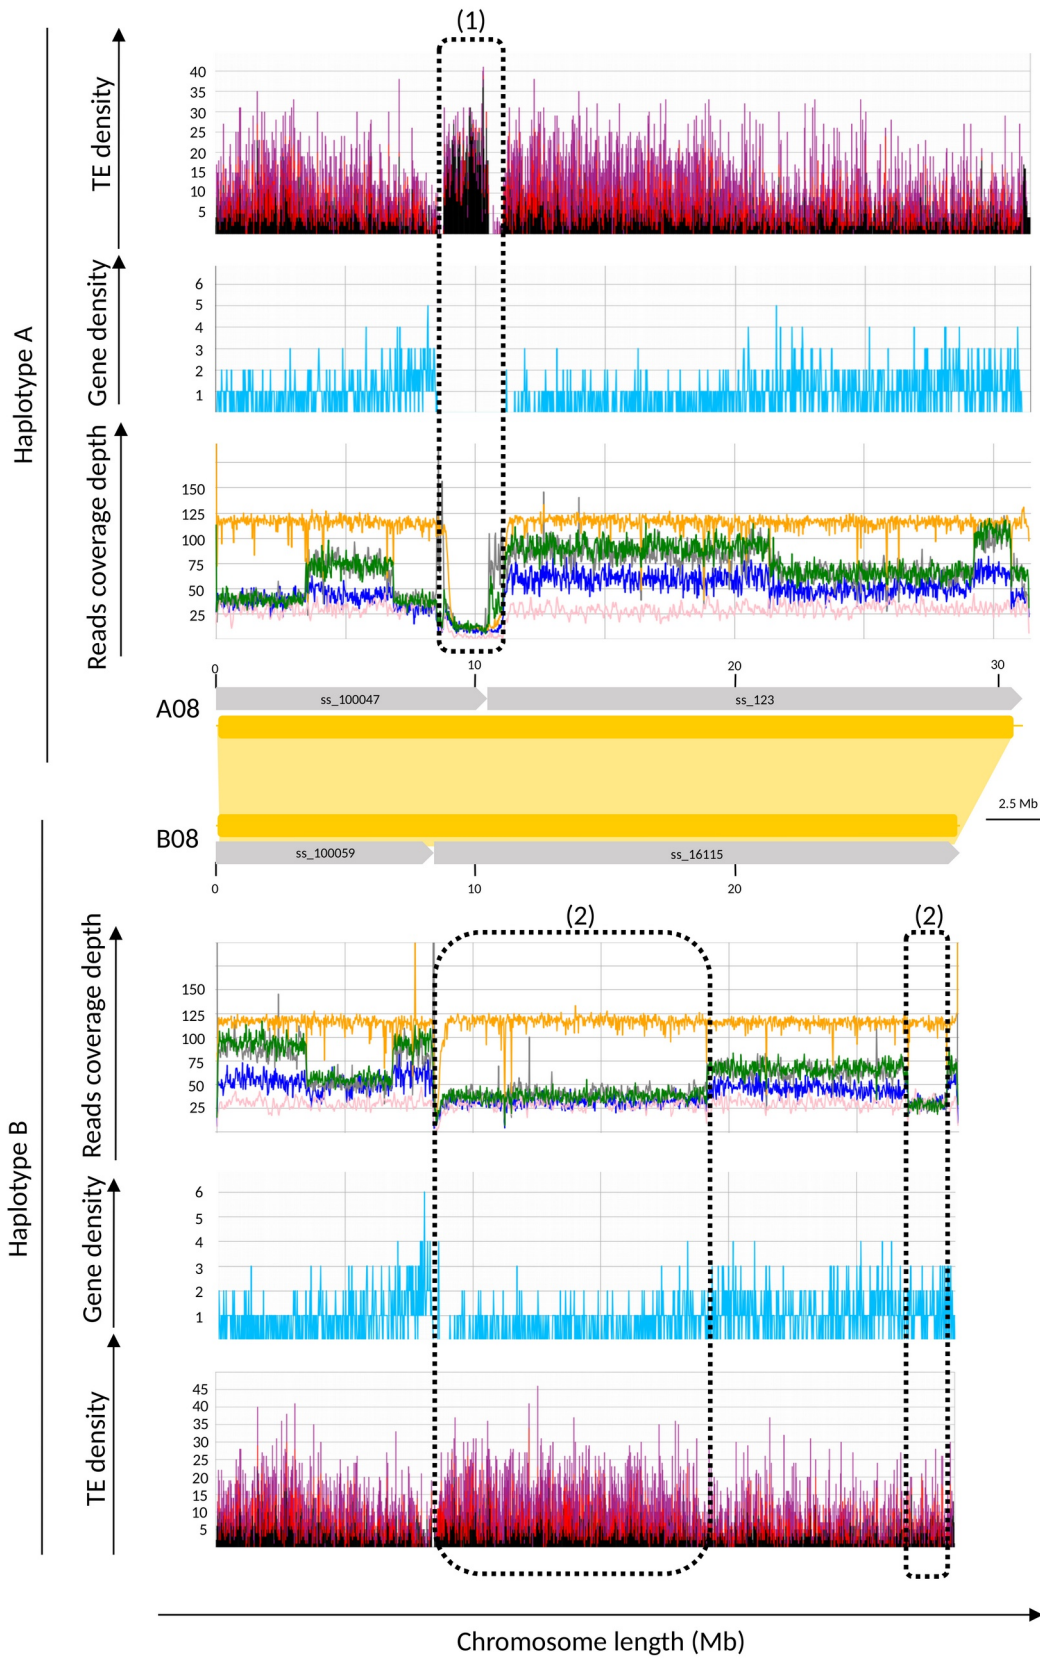

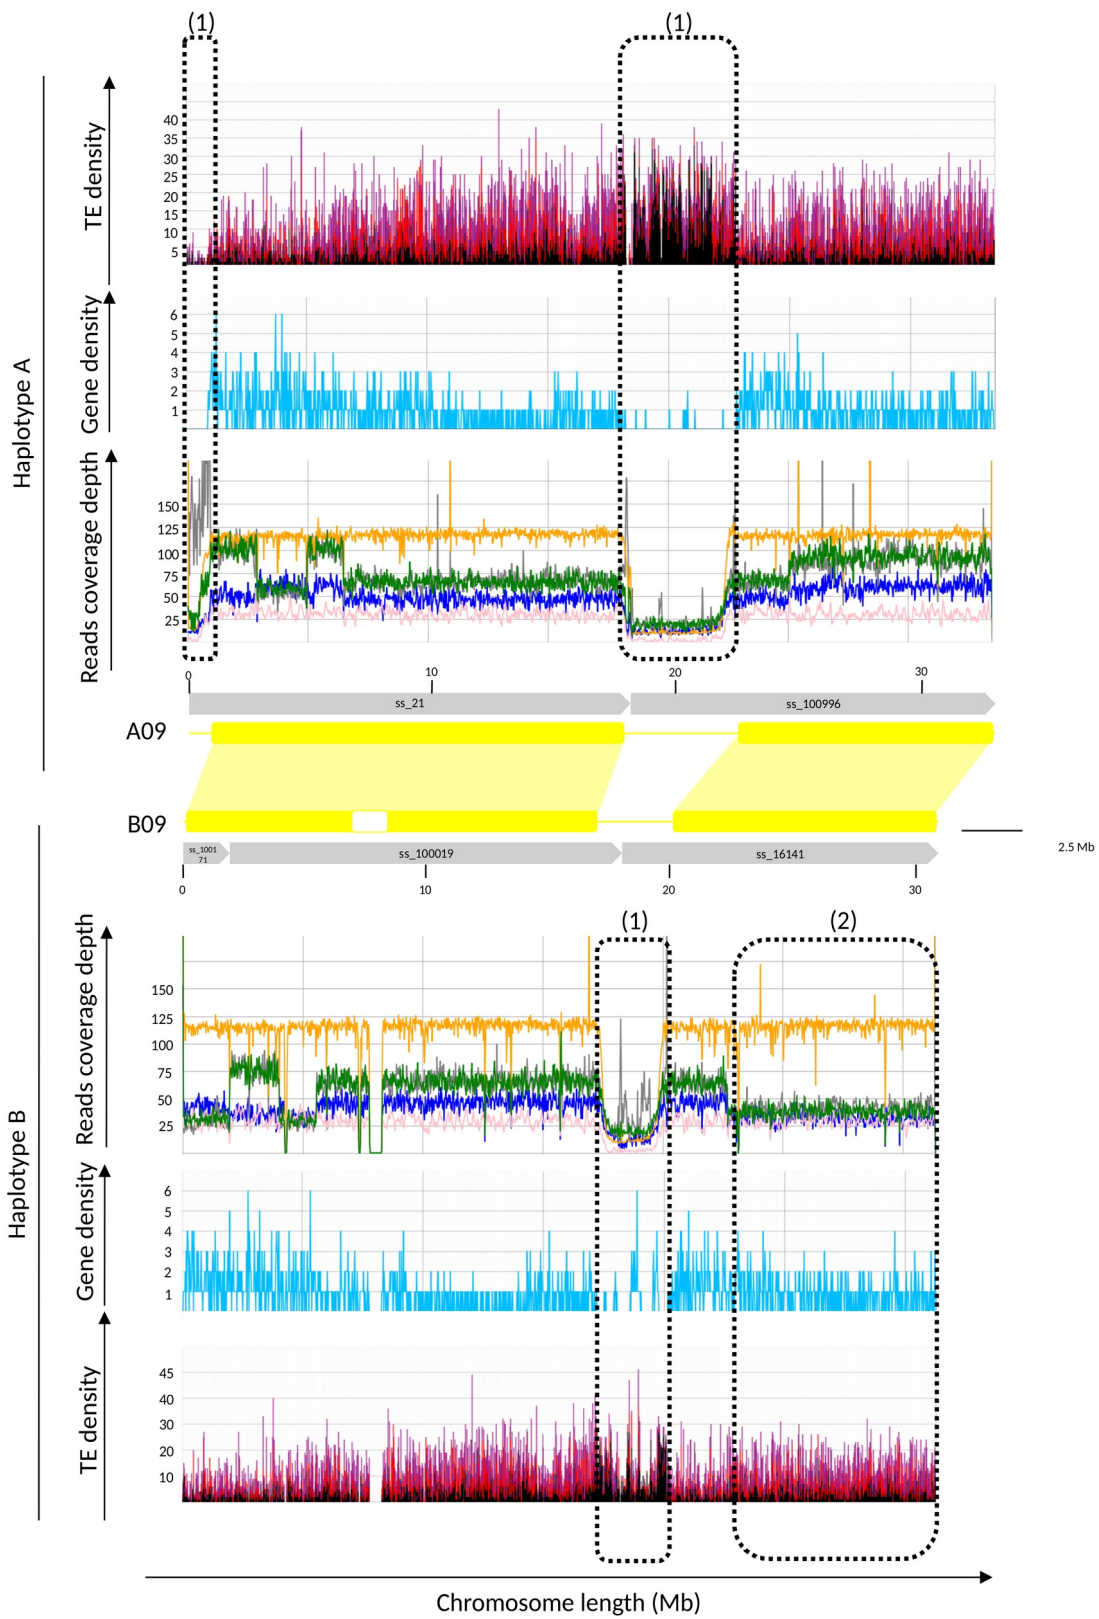



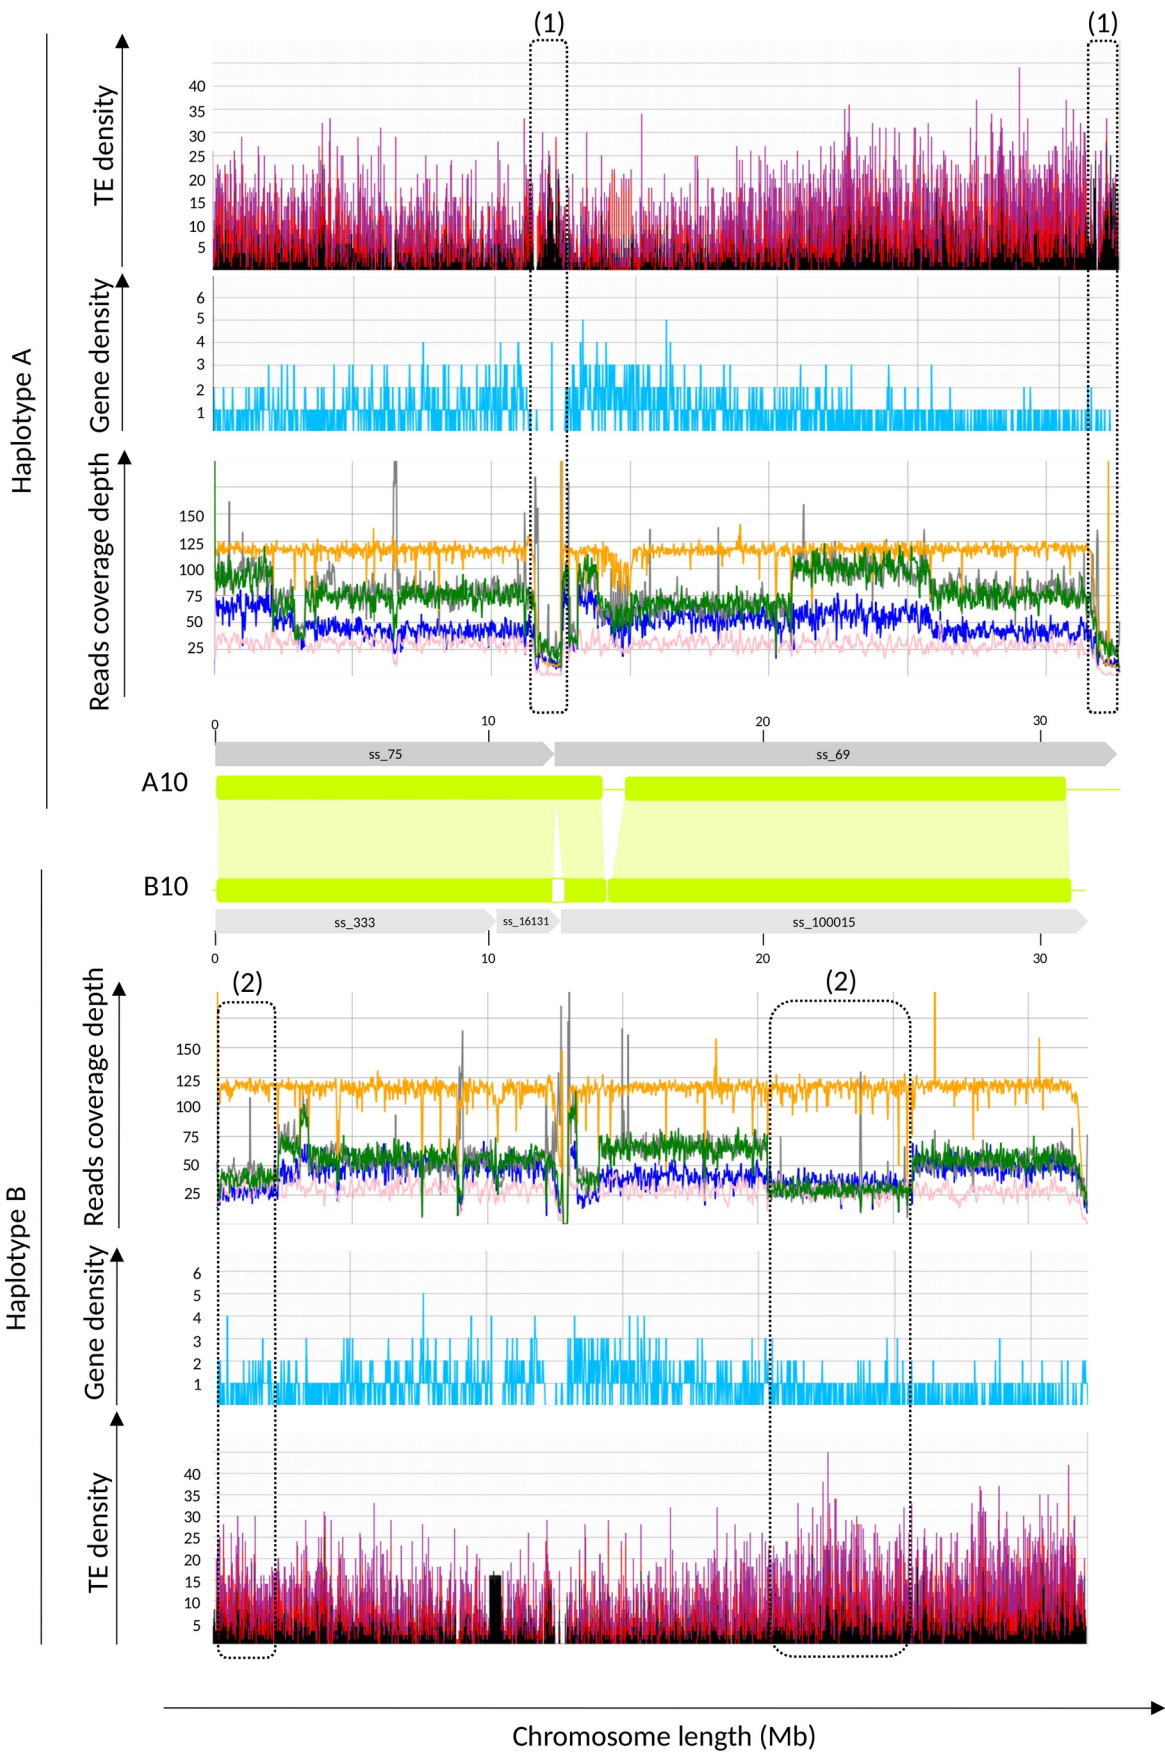

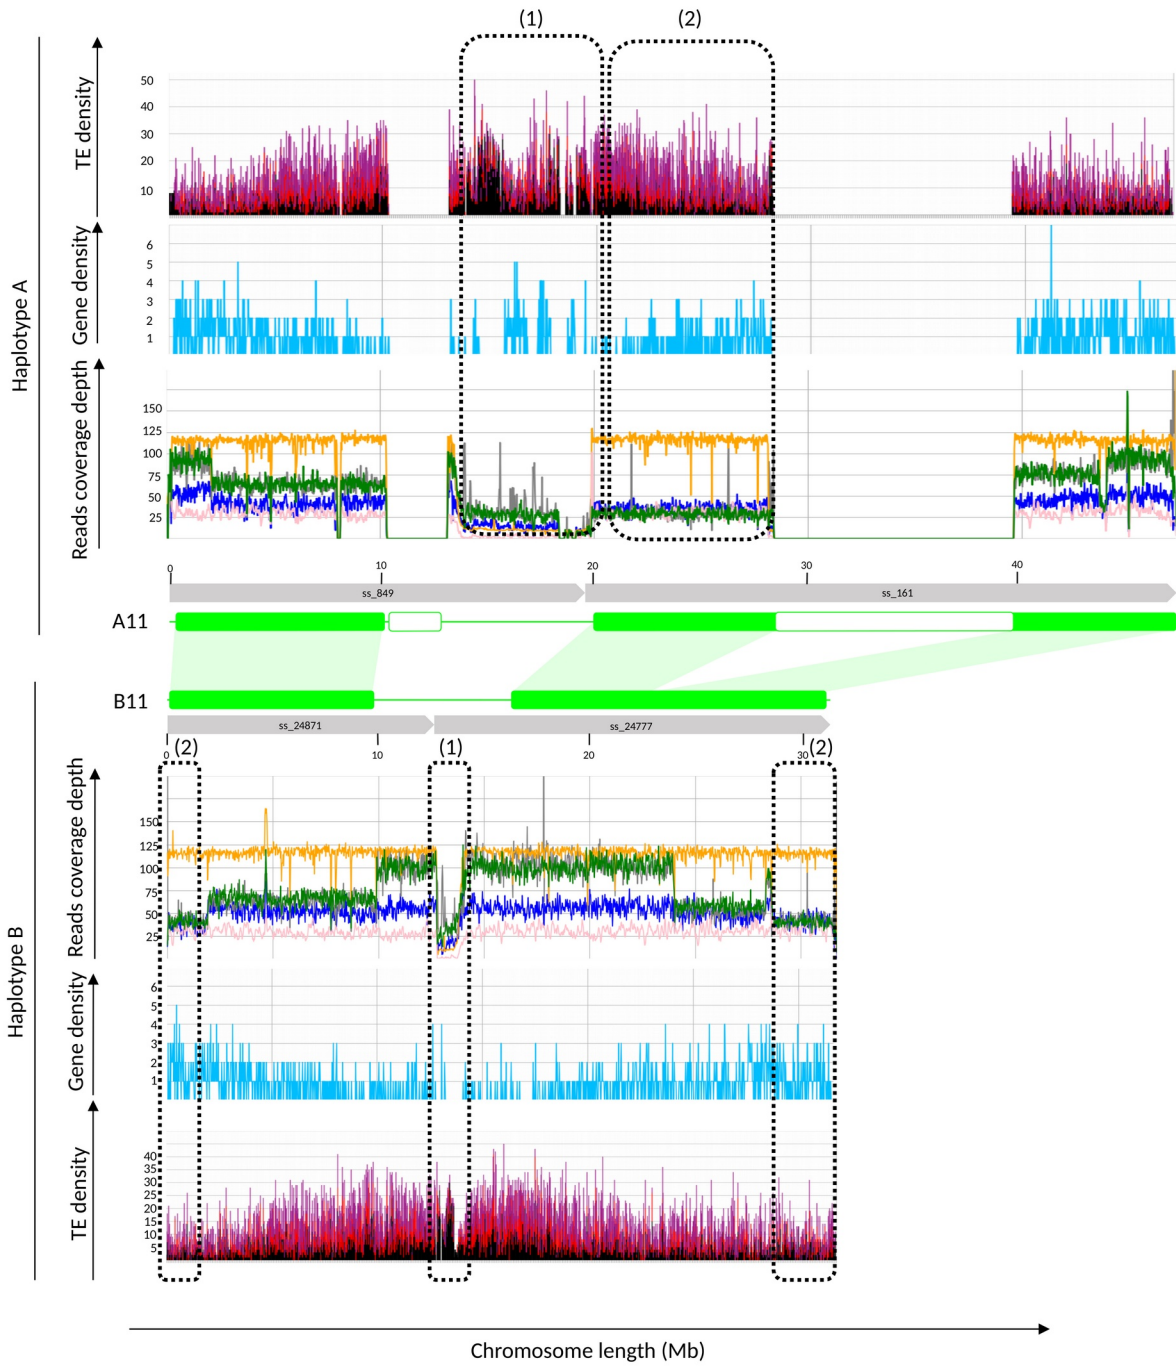

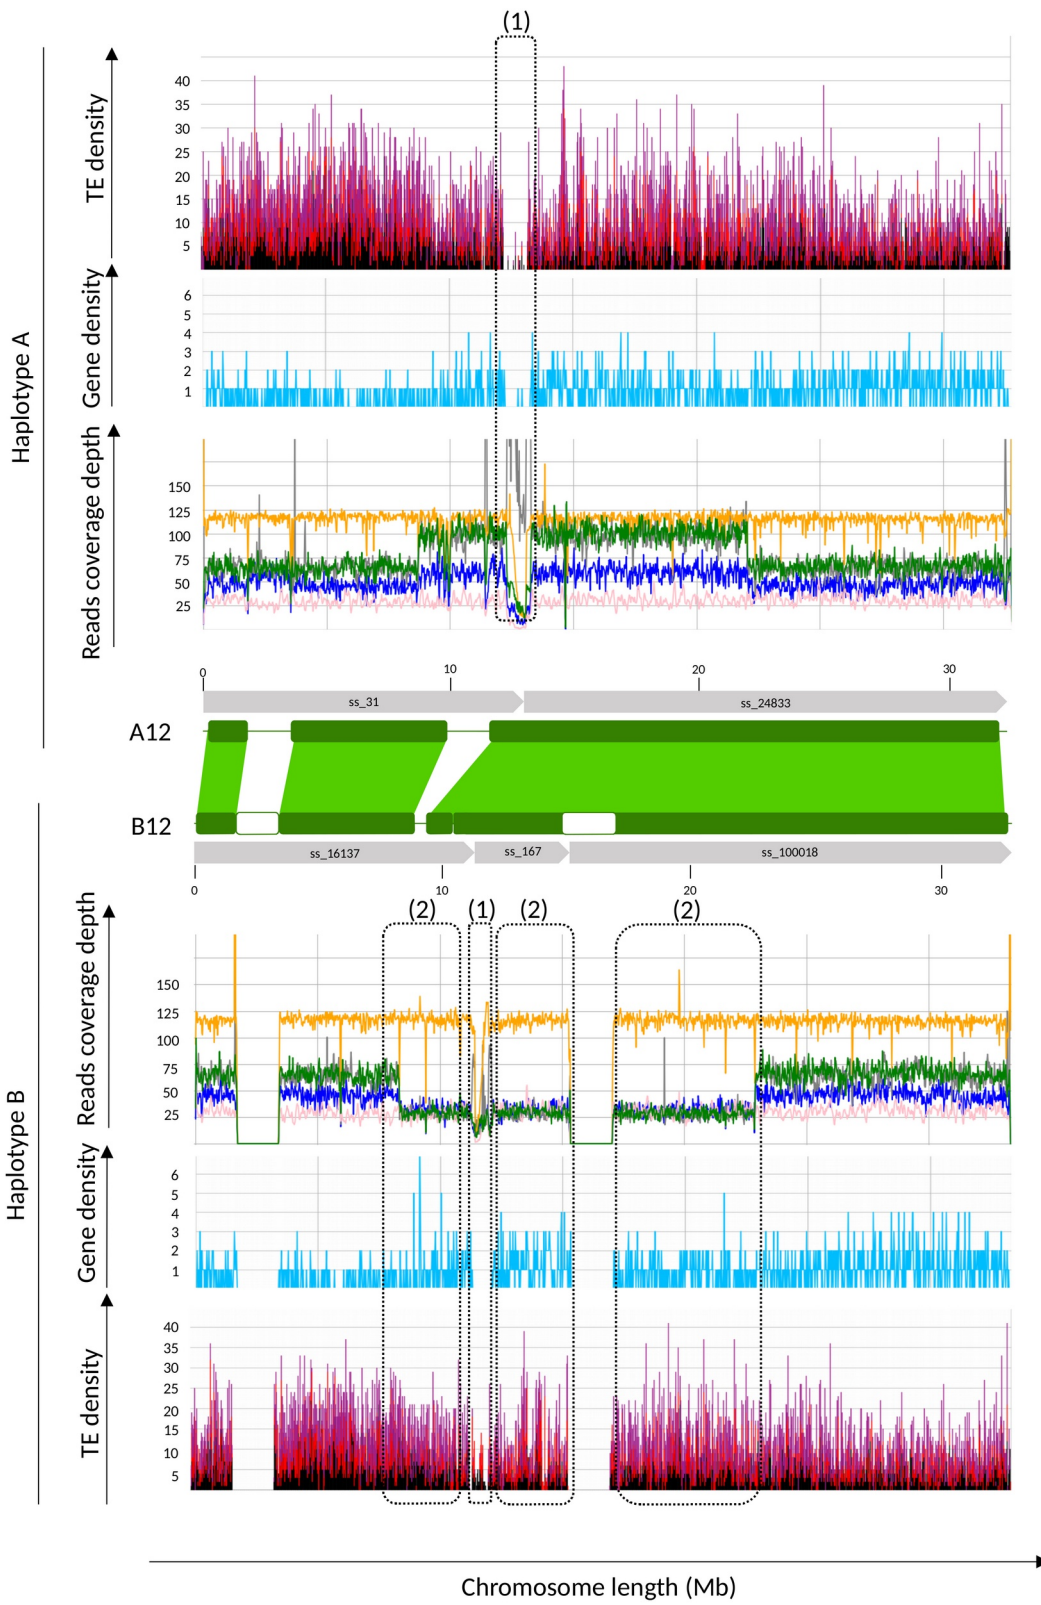



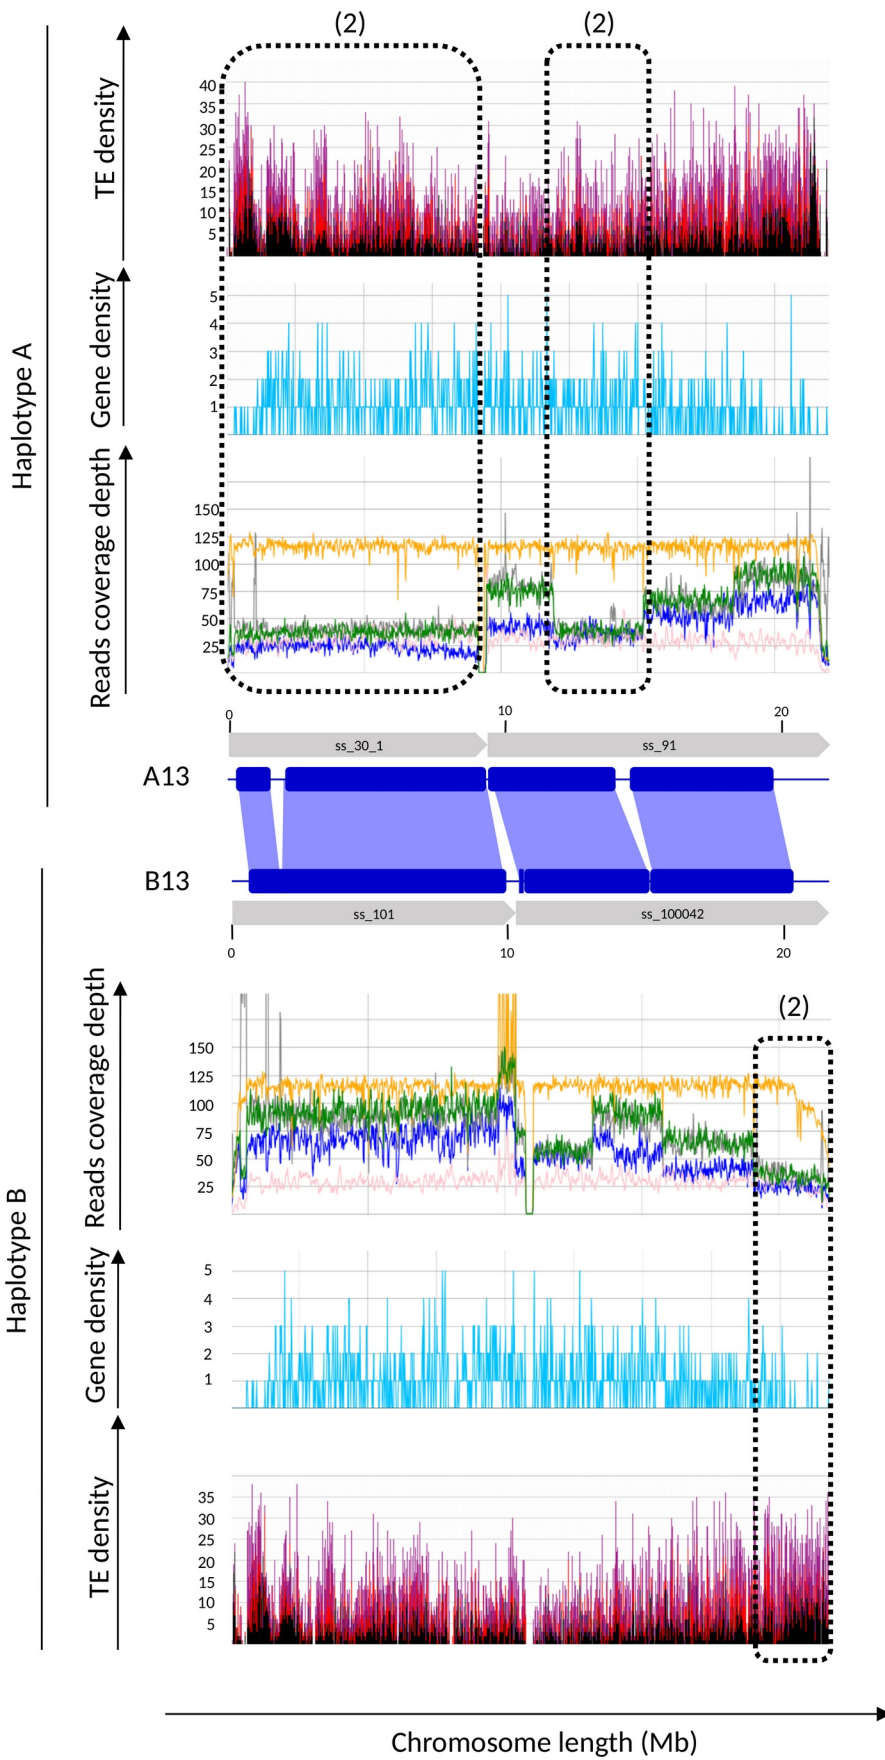

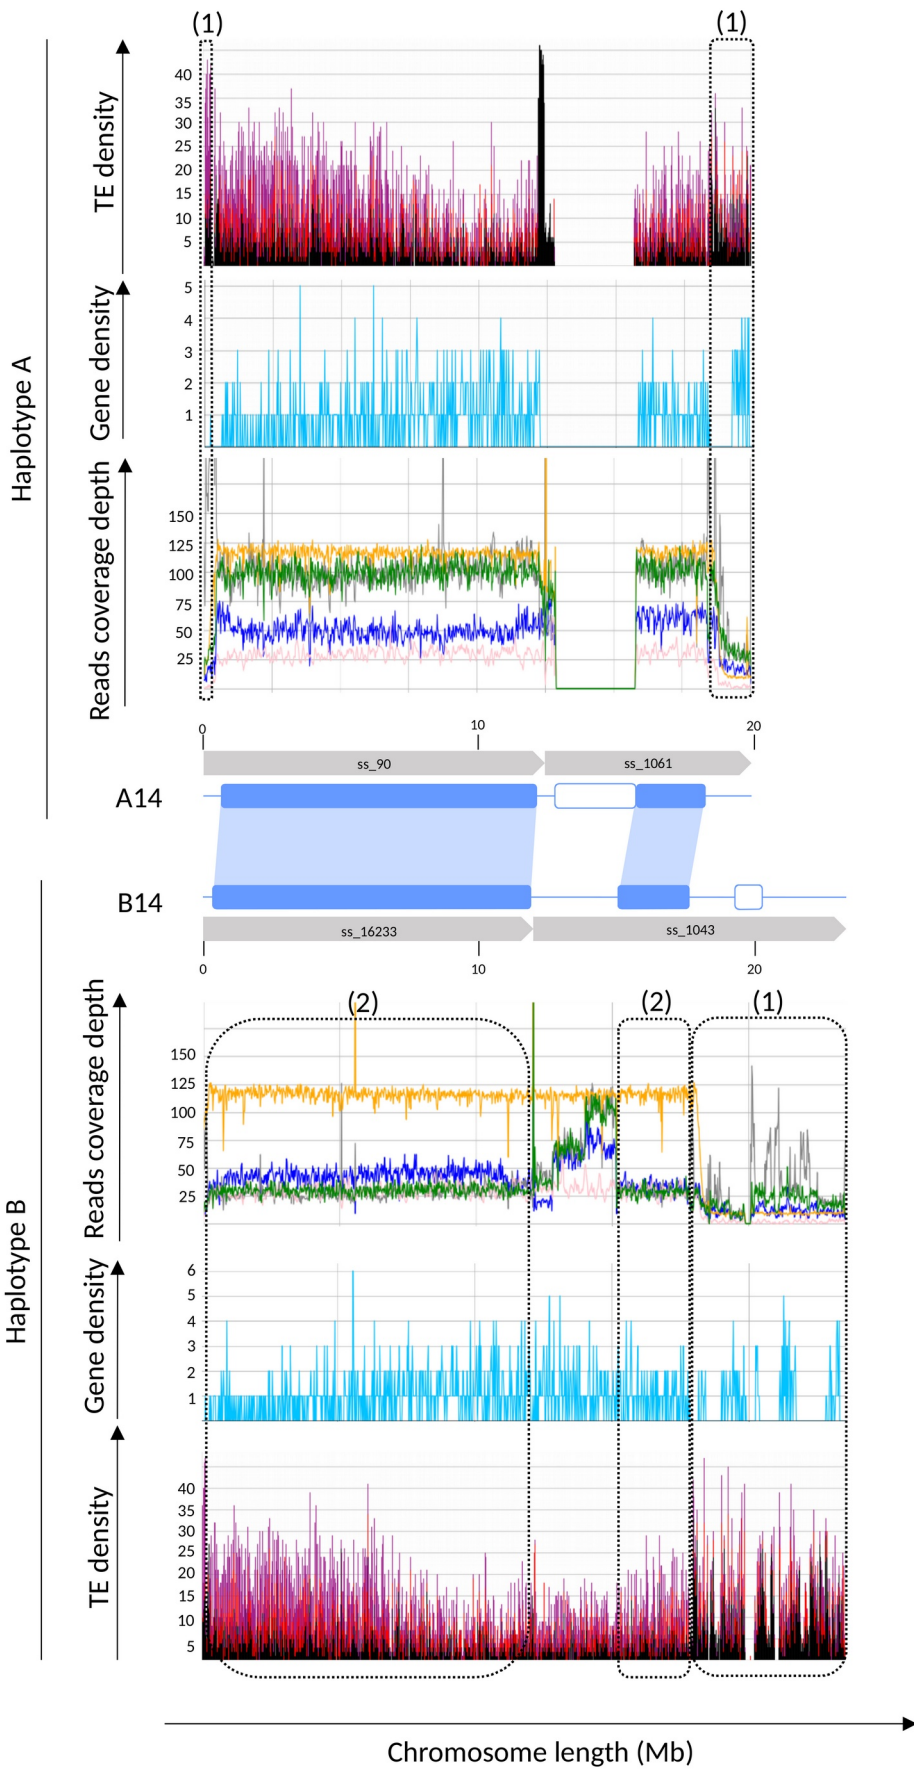

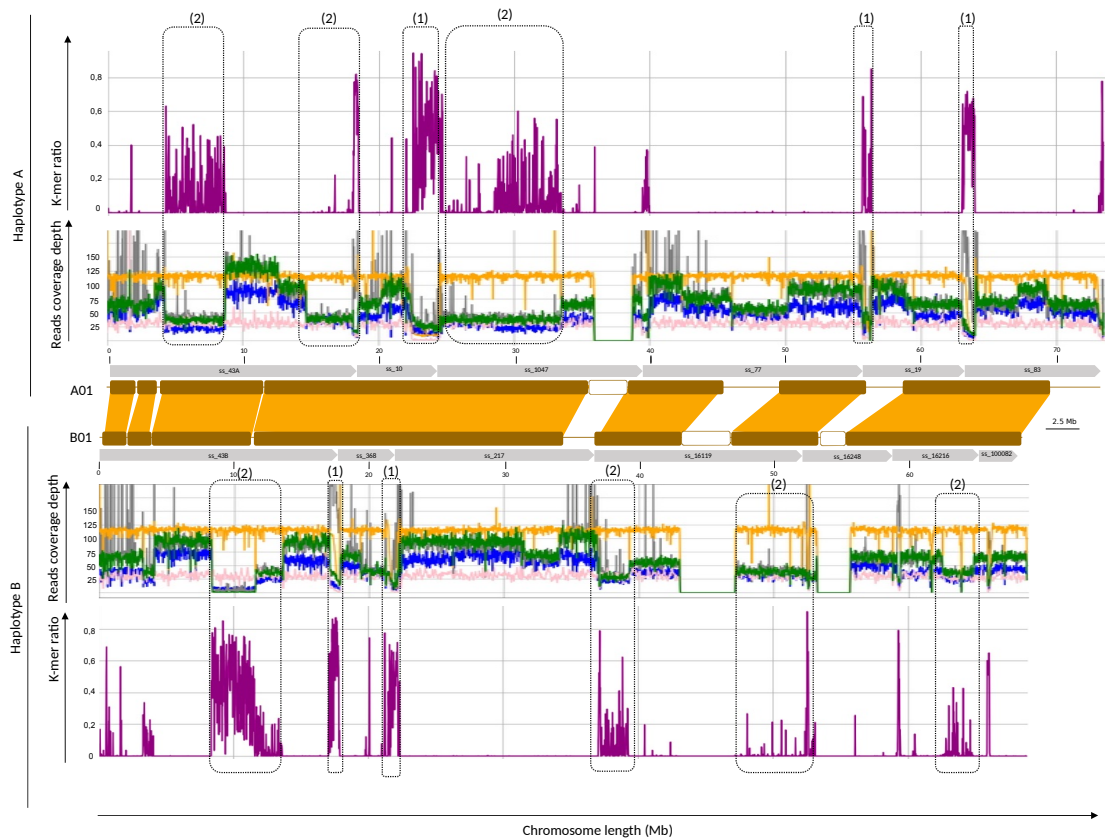

68 Supplemental Figure 10 Sequencing reads coverage depth and 5X-15X depth k-mers density  
 69 distribution along the 14 pairs of chromosomes  
 70 Obtained by mapping Daphna Illumina reads (yellow), CR0040 PacBio HiFi (blue), Nanopore  
 71 reads (green) and optical mapping data (red) on the CR0040 assembly. The ratio of k-mers  
 72 (47-mers) of depth between 5X and 15X are represented along each pair of chromosomes  
 73 (genomic windows of 20Kb). For other details see the legend of Supplemental Figure 9.

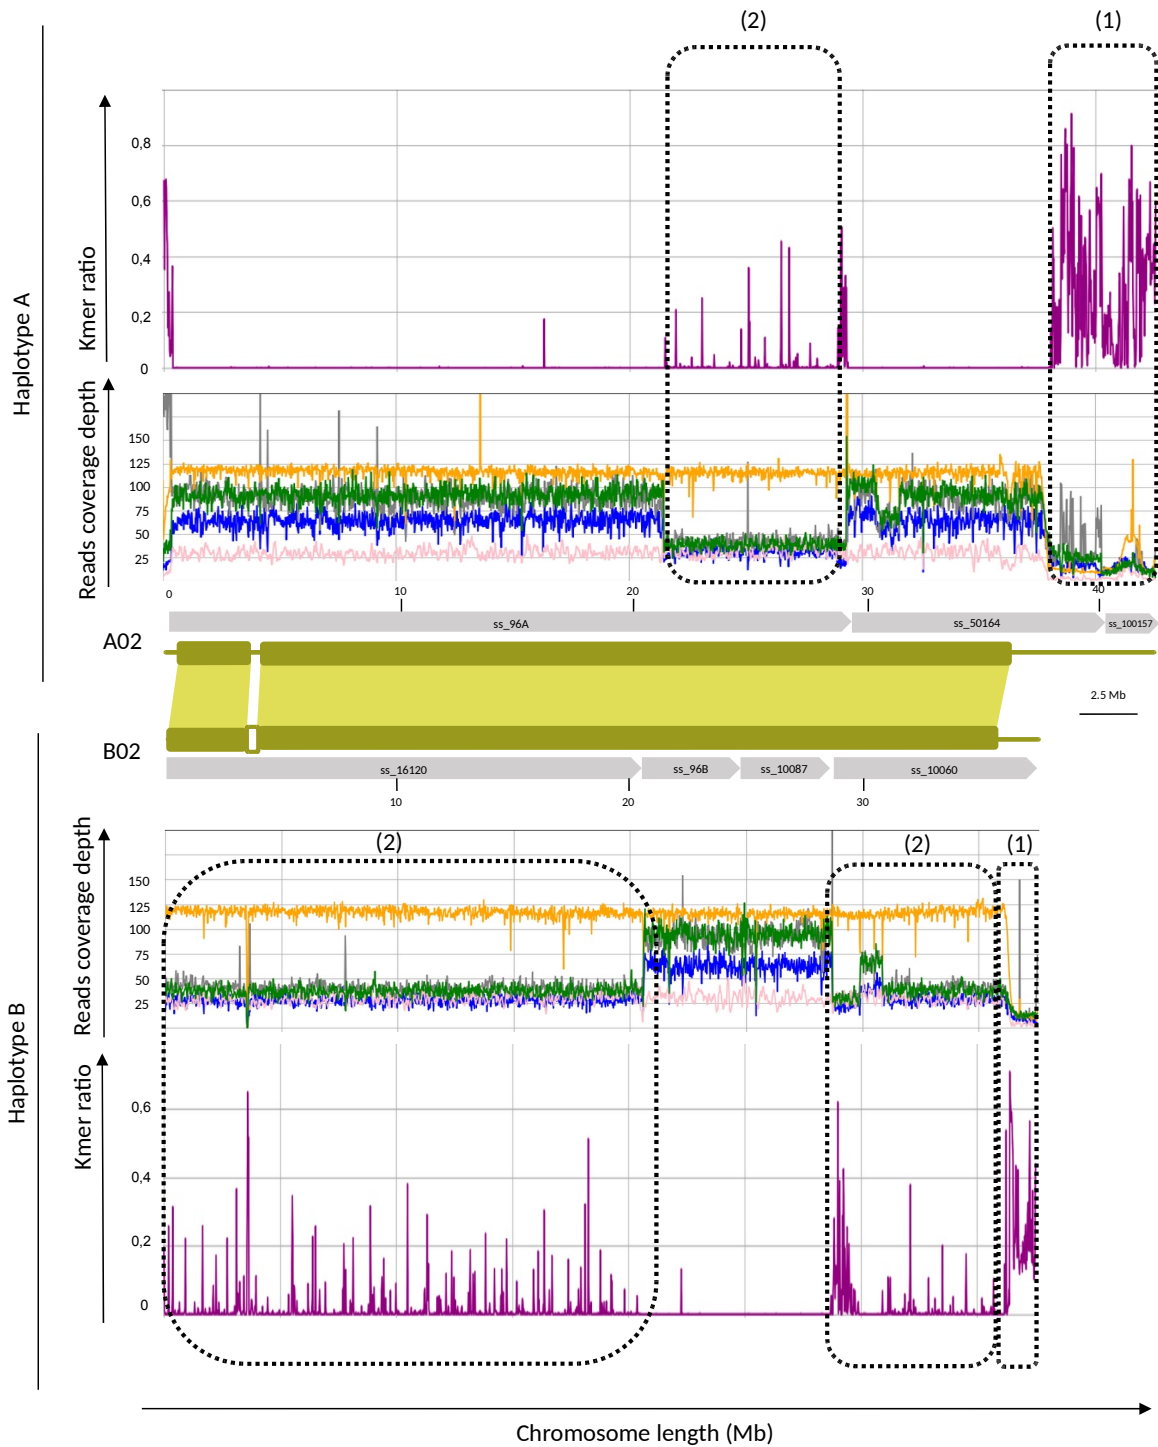

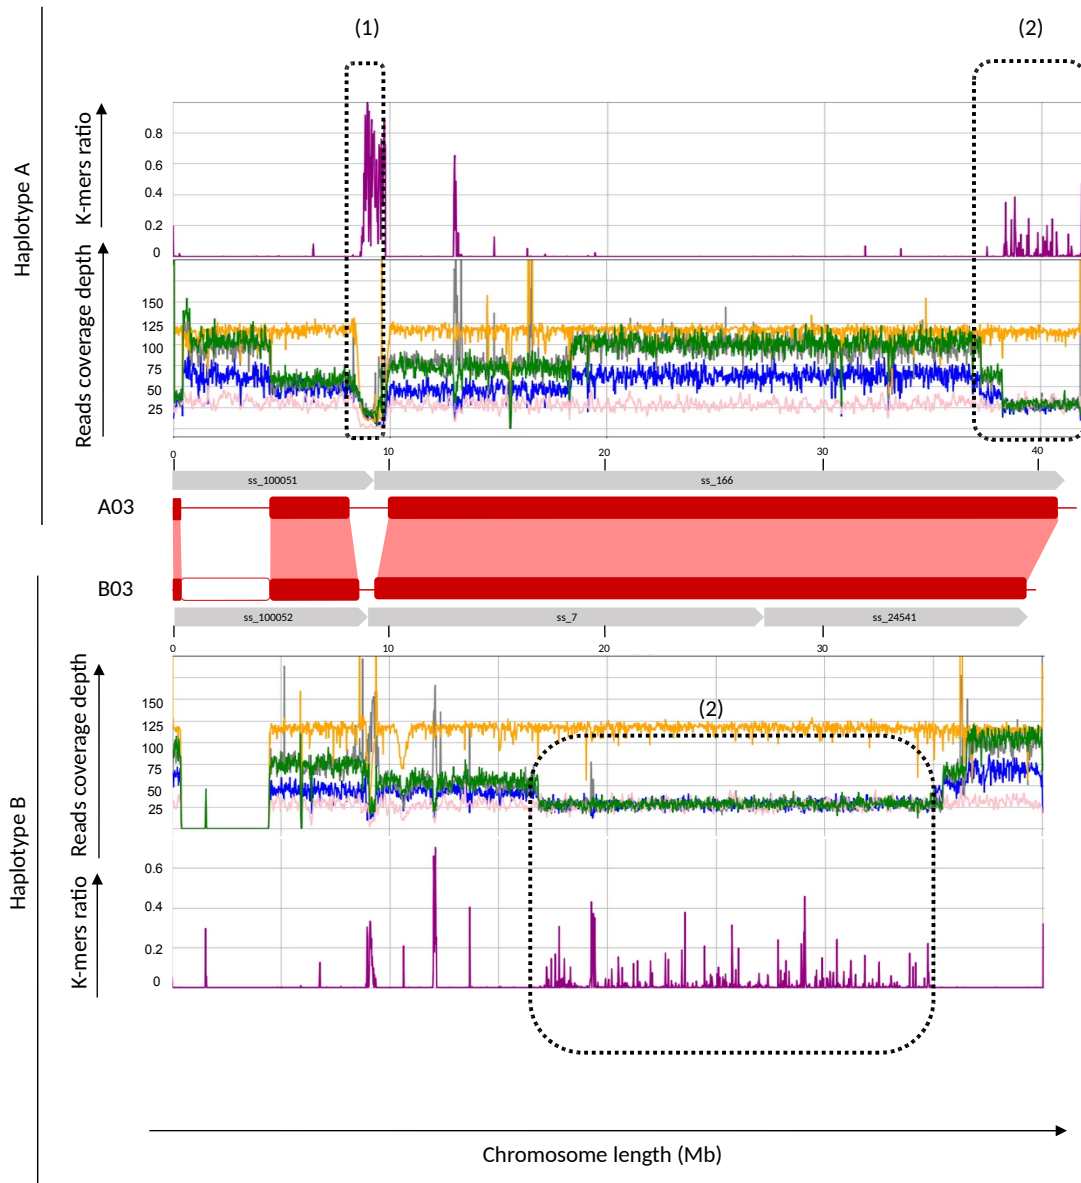



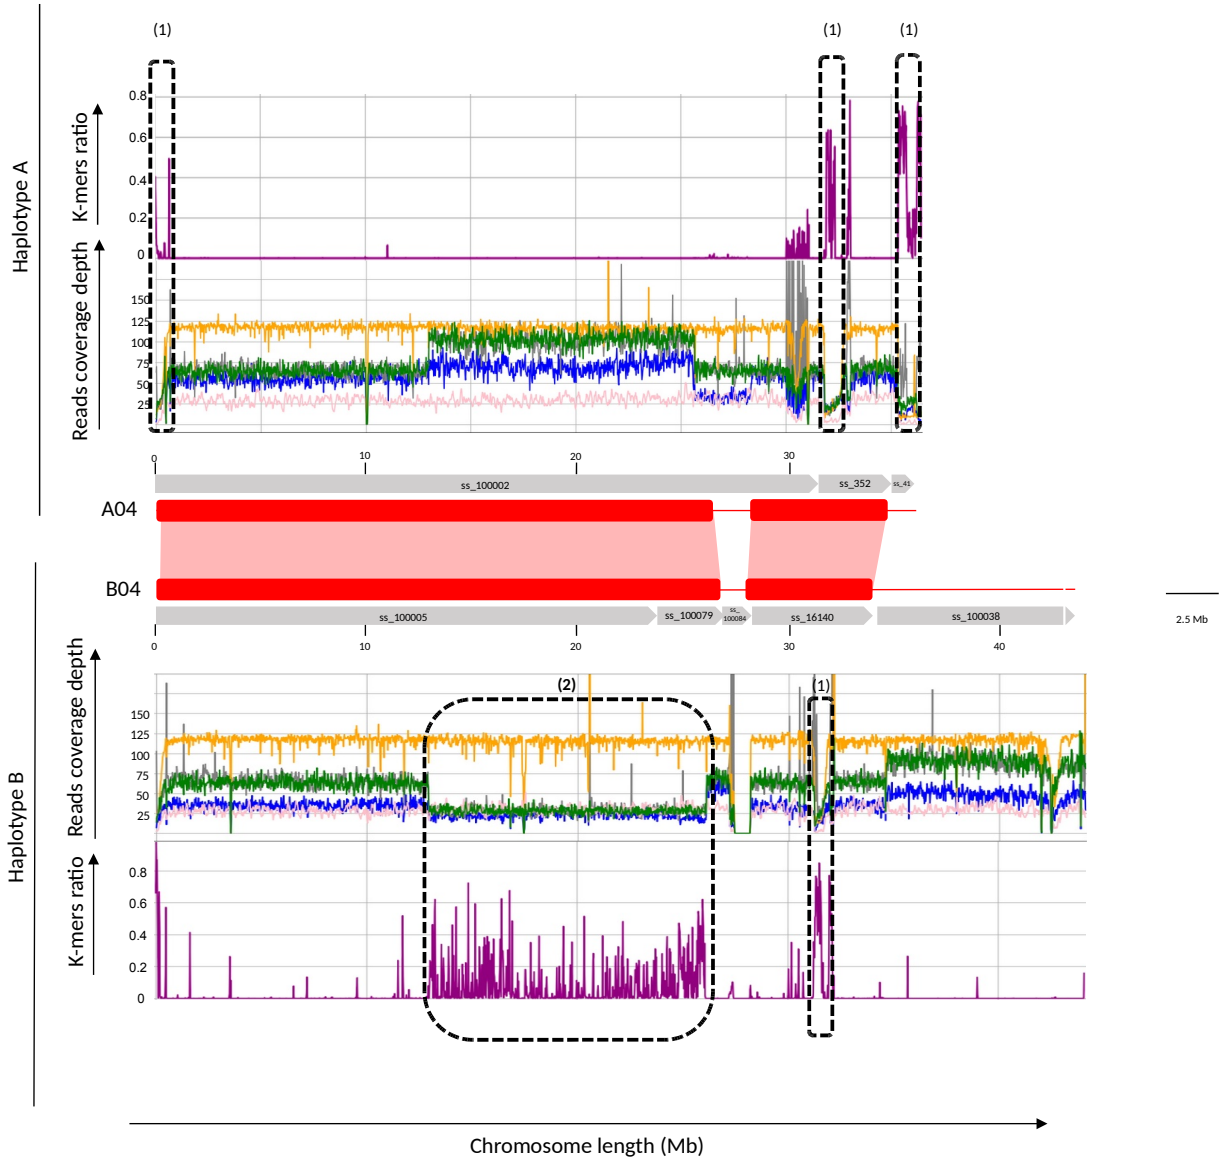

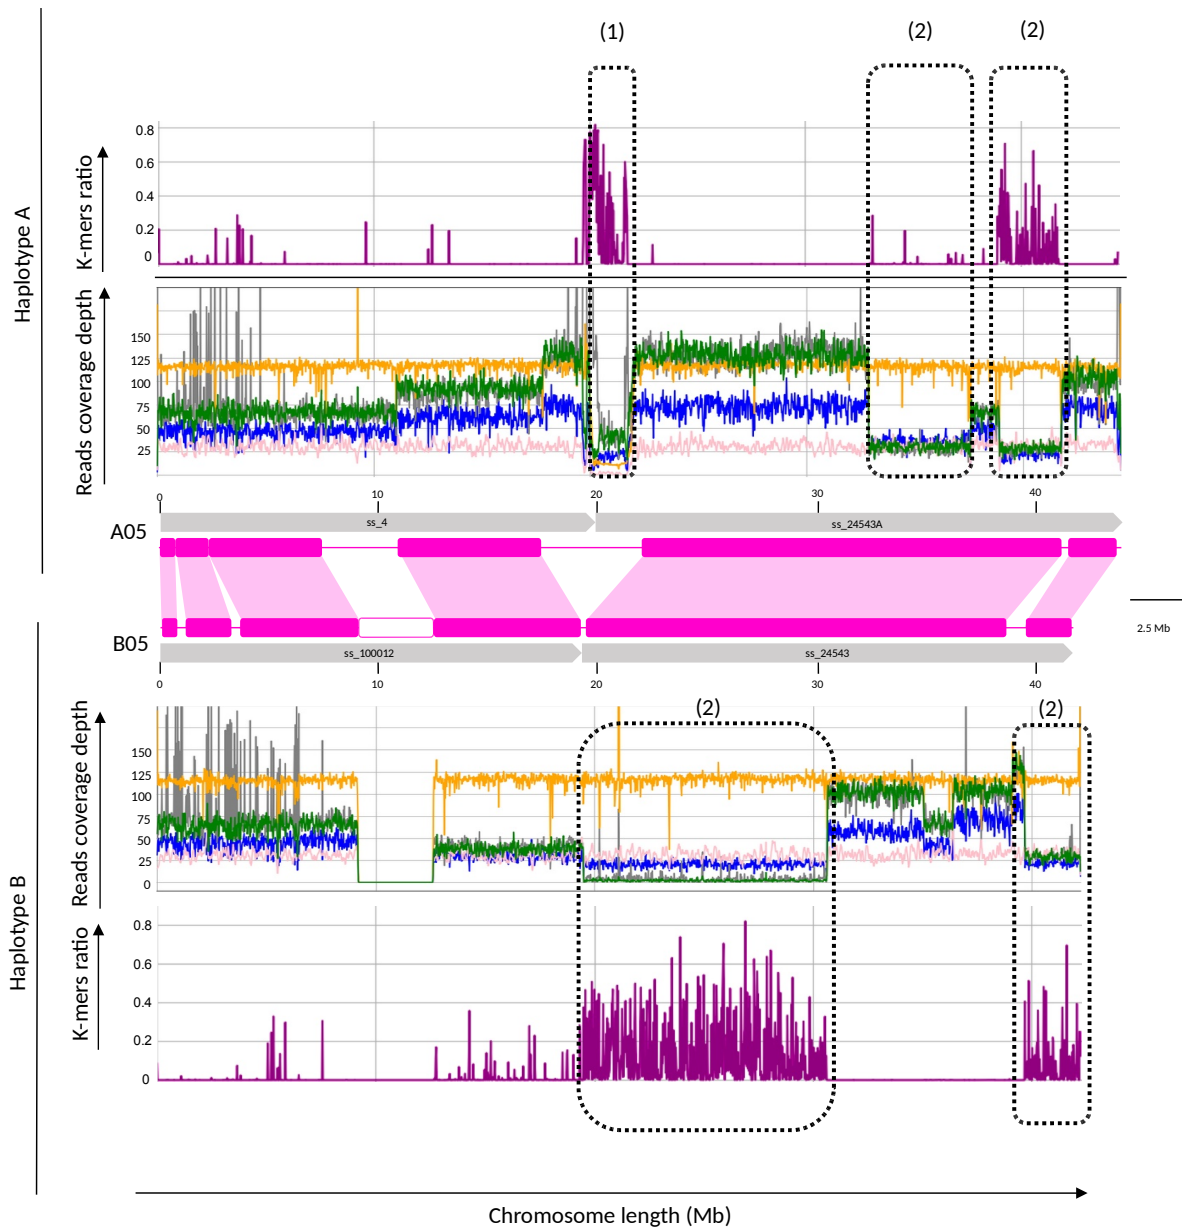

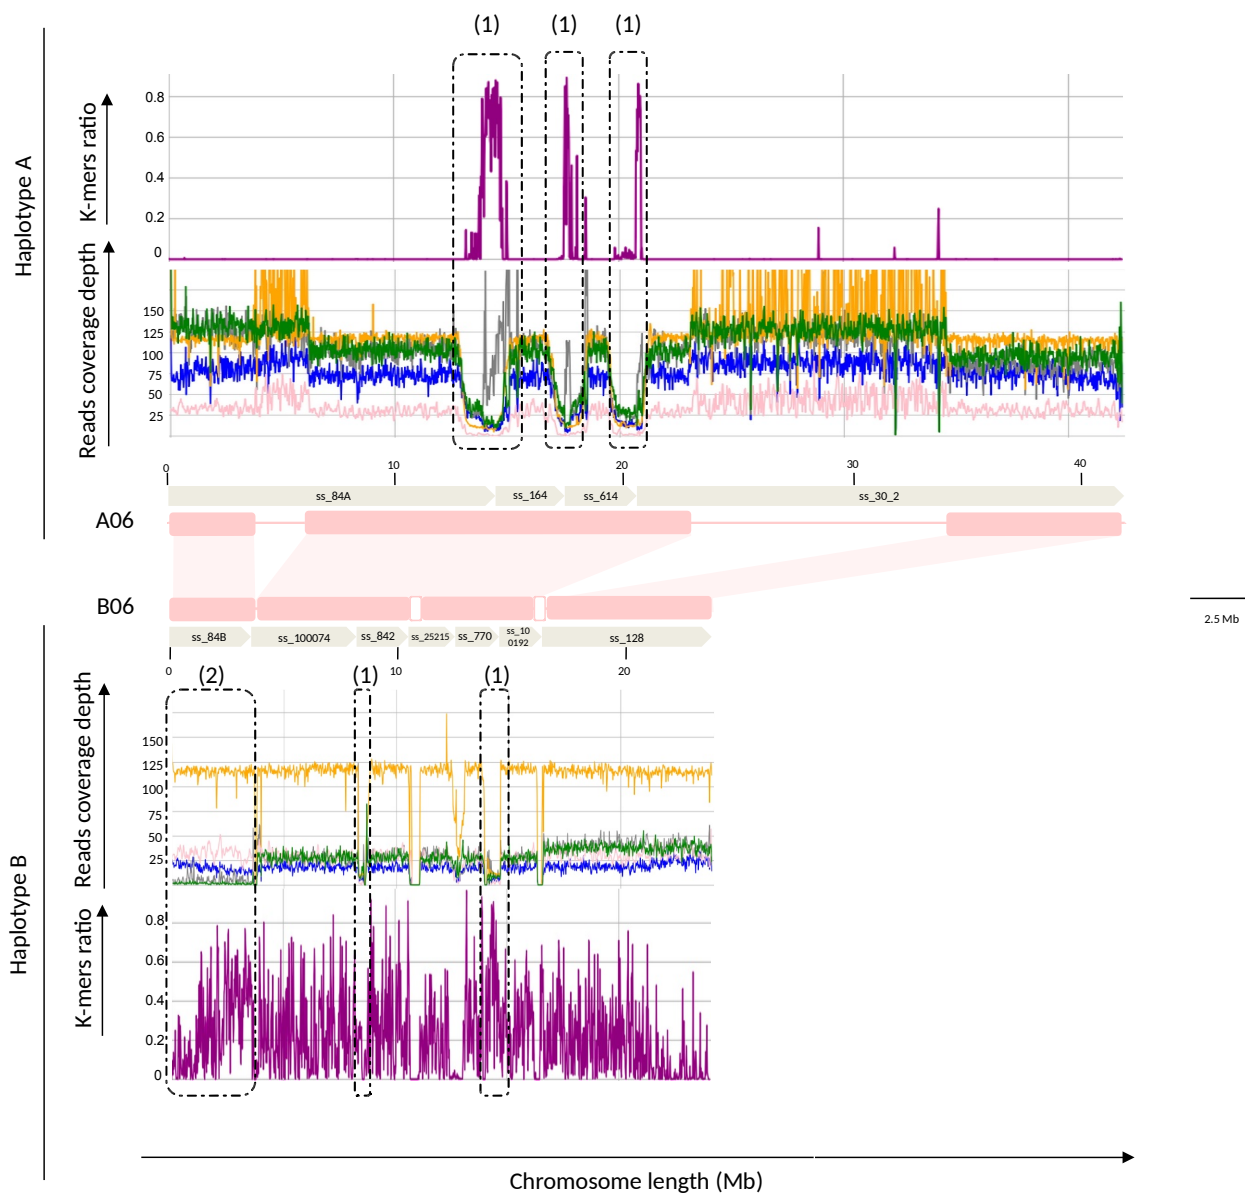

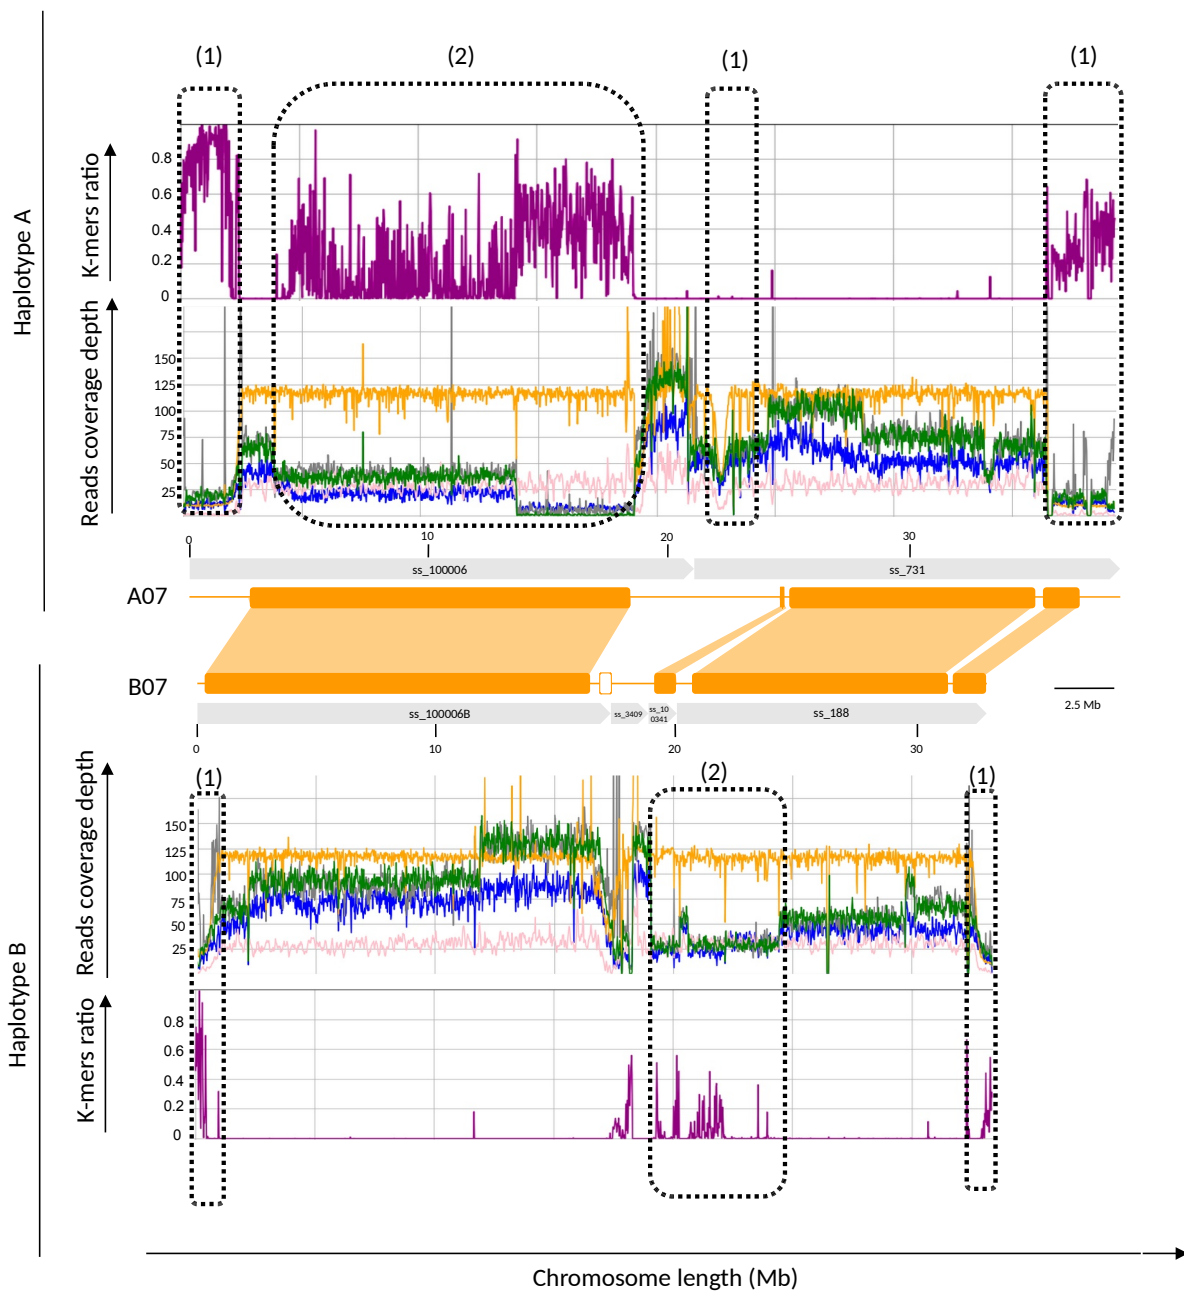

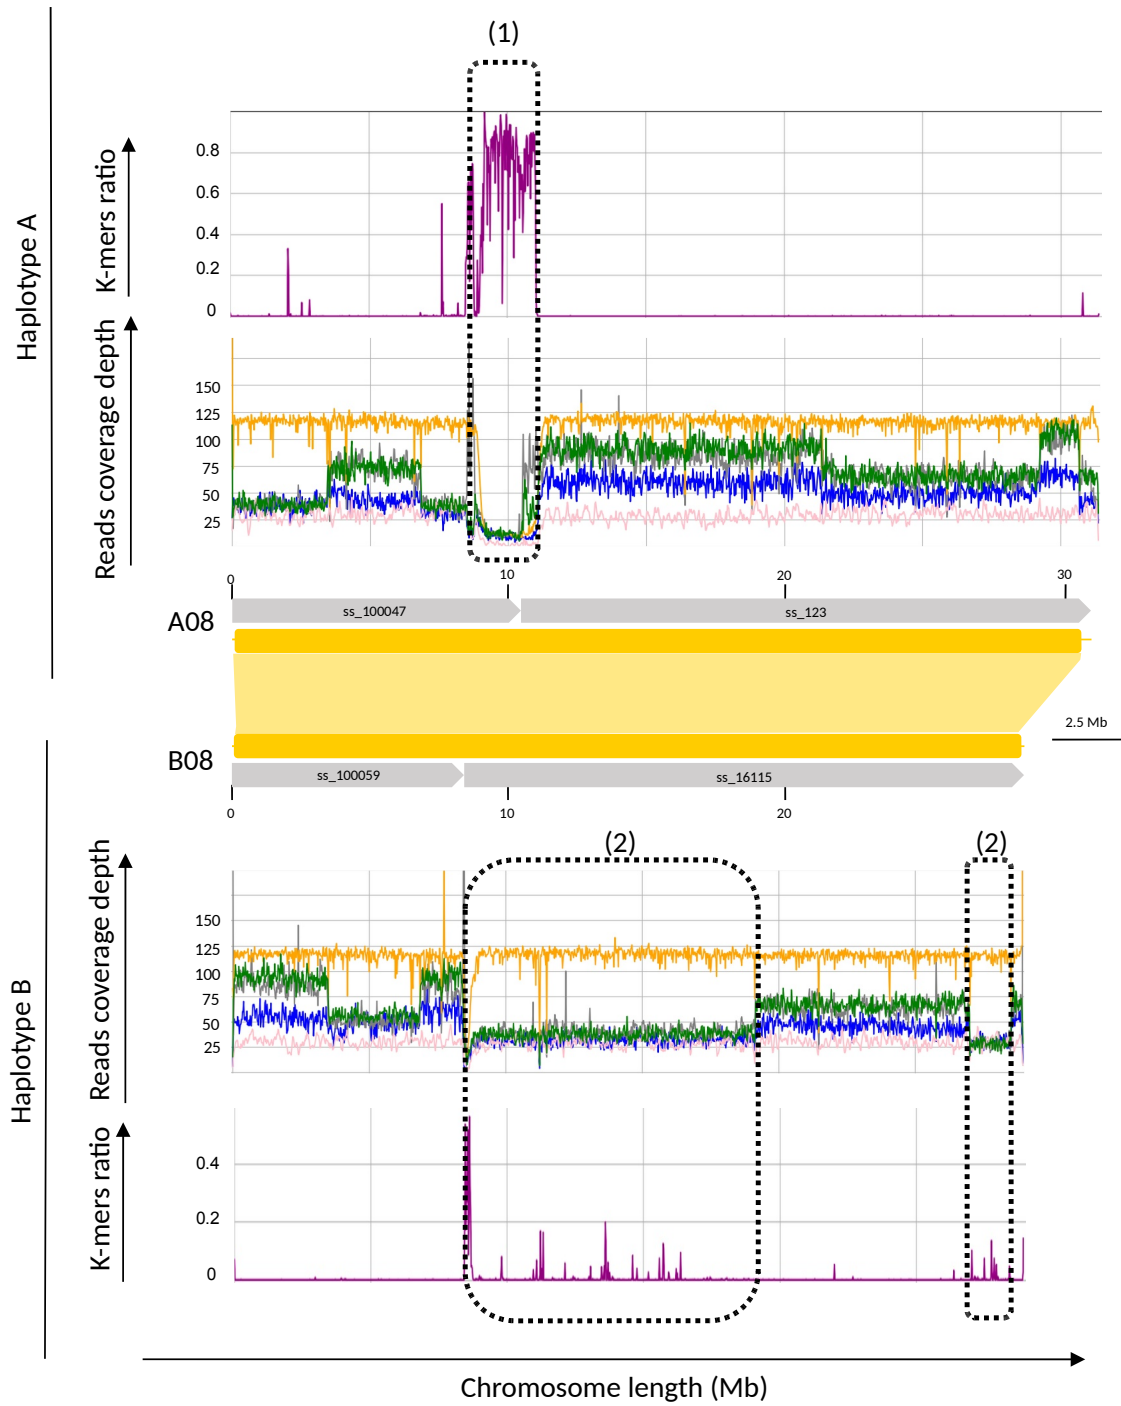

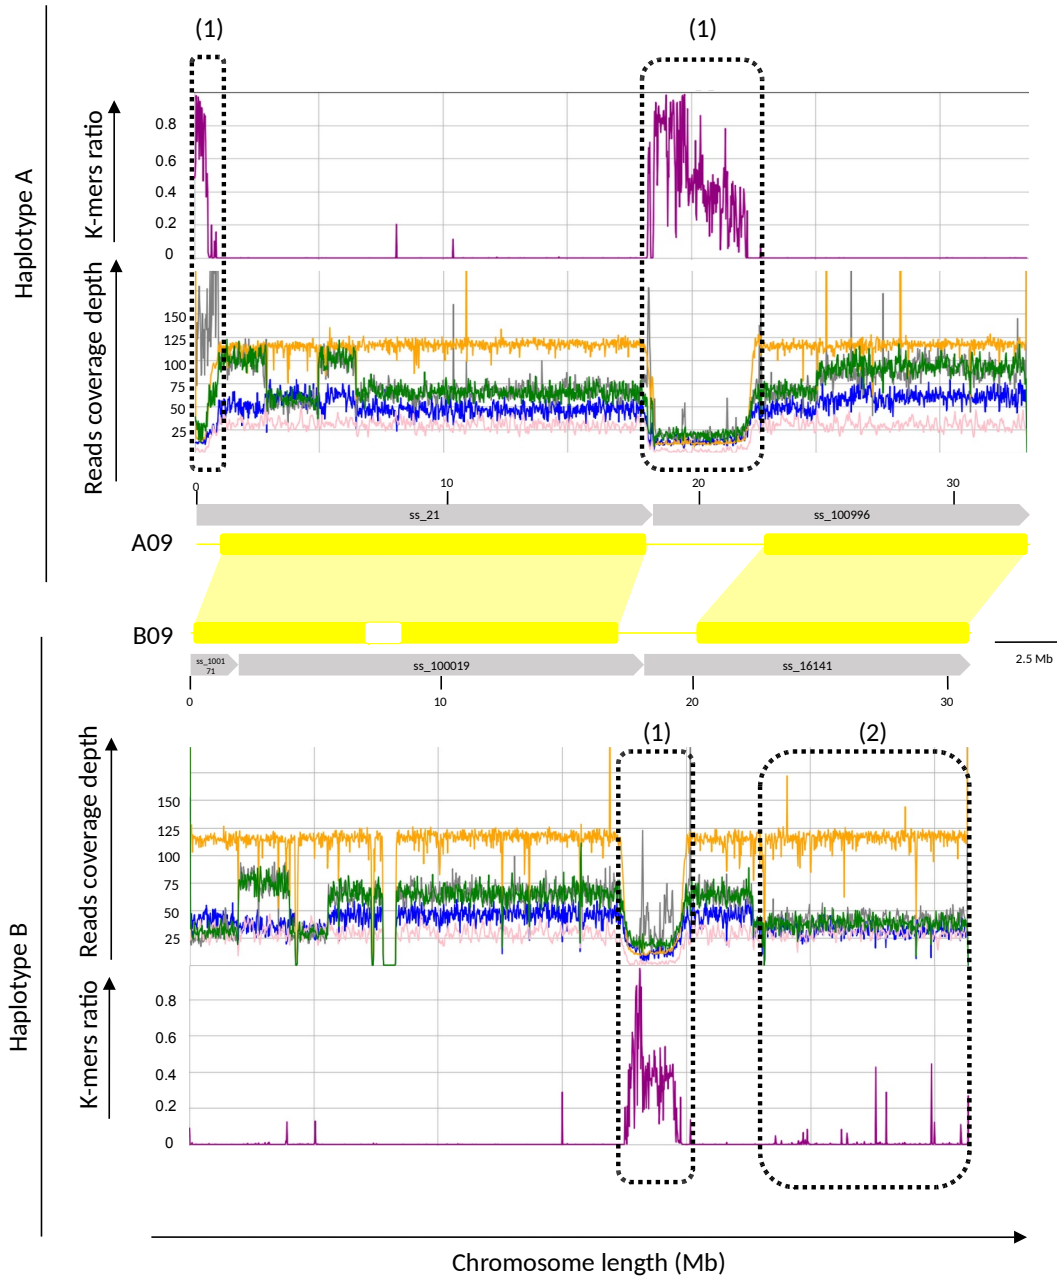

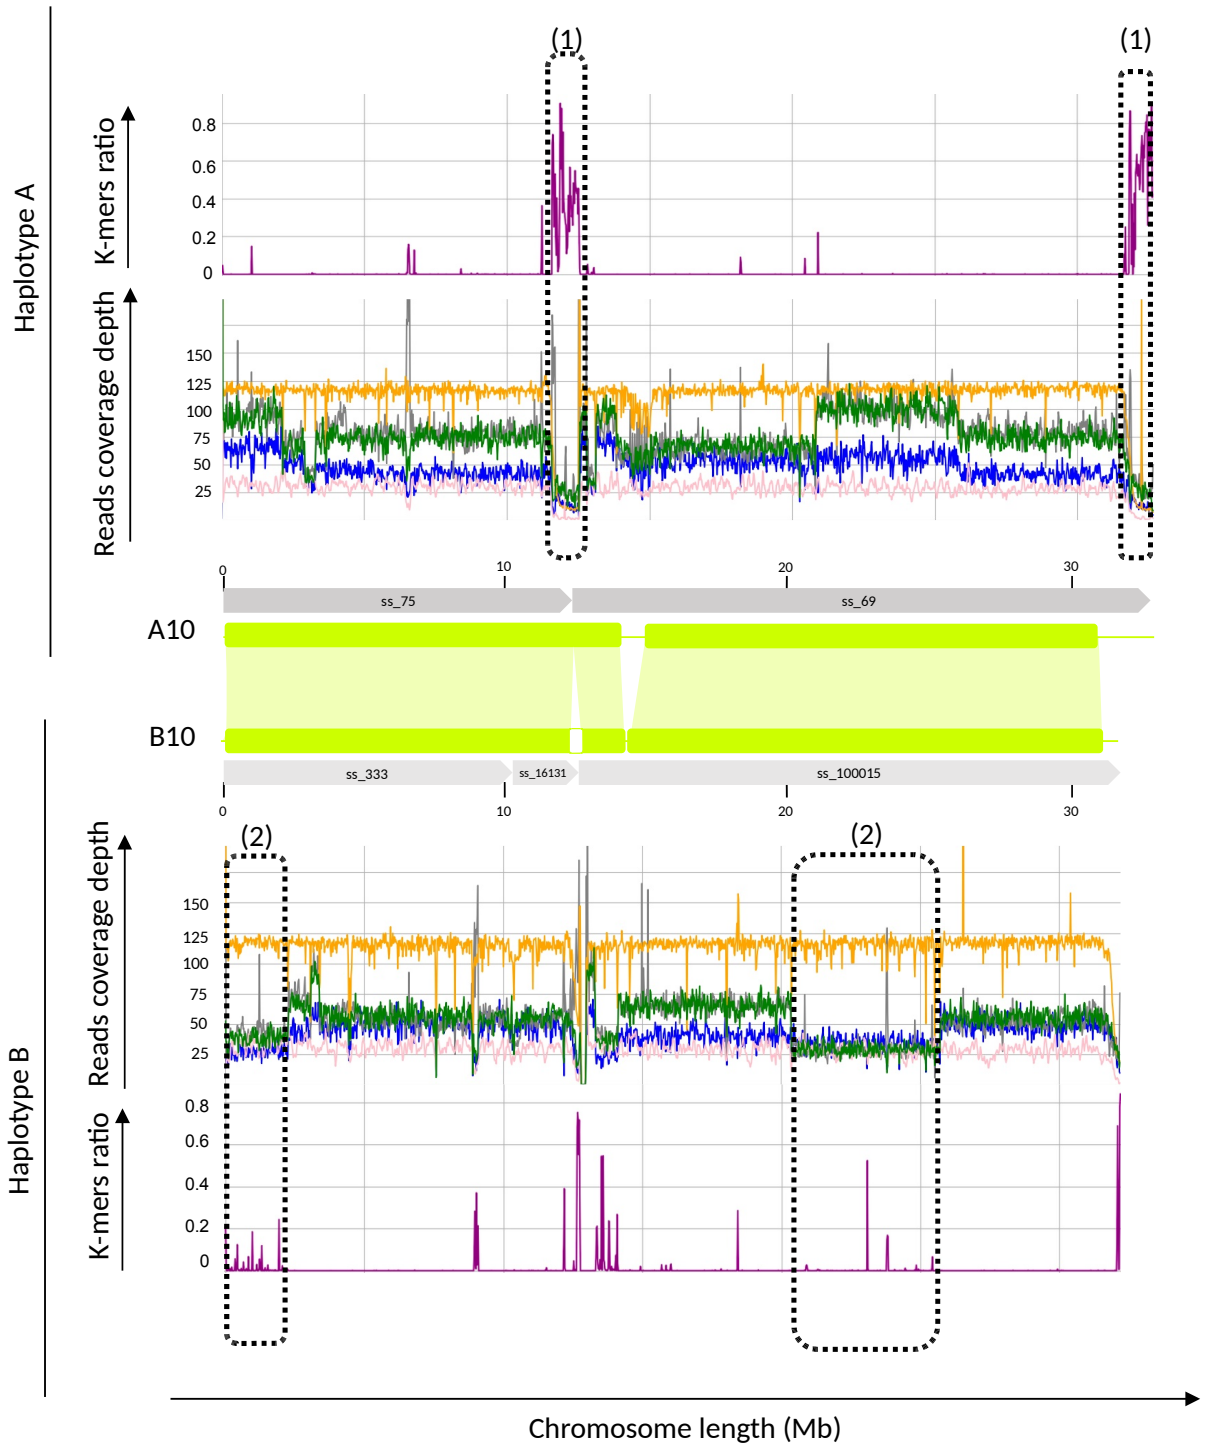



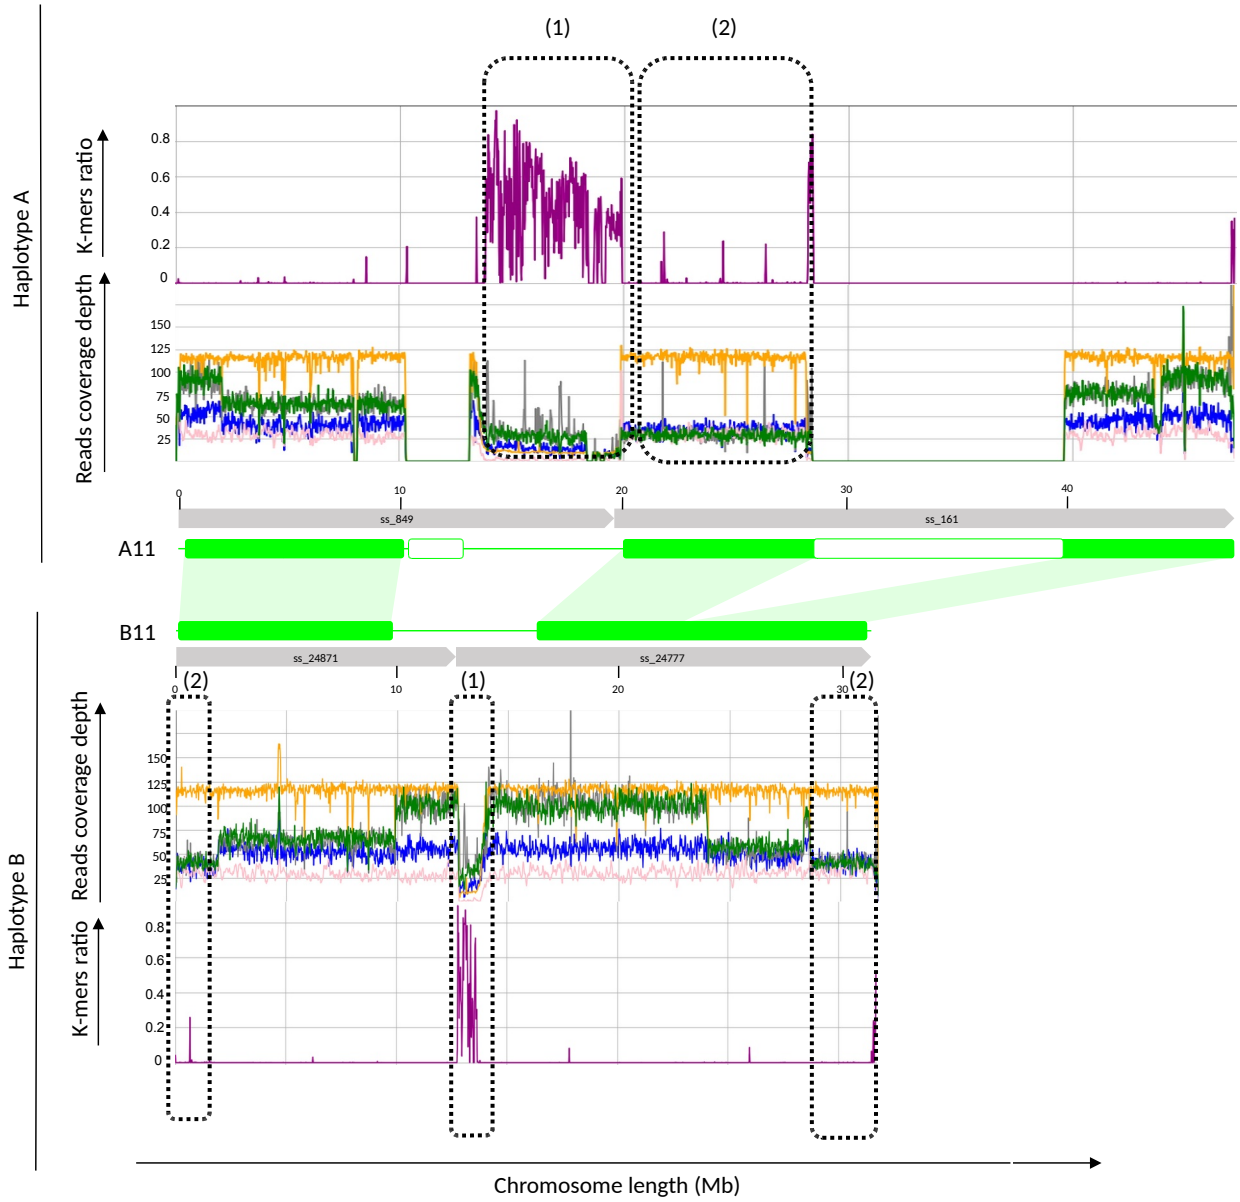



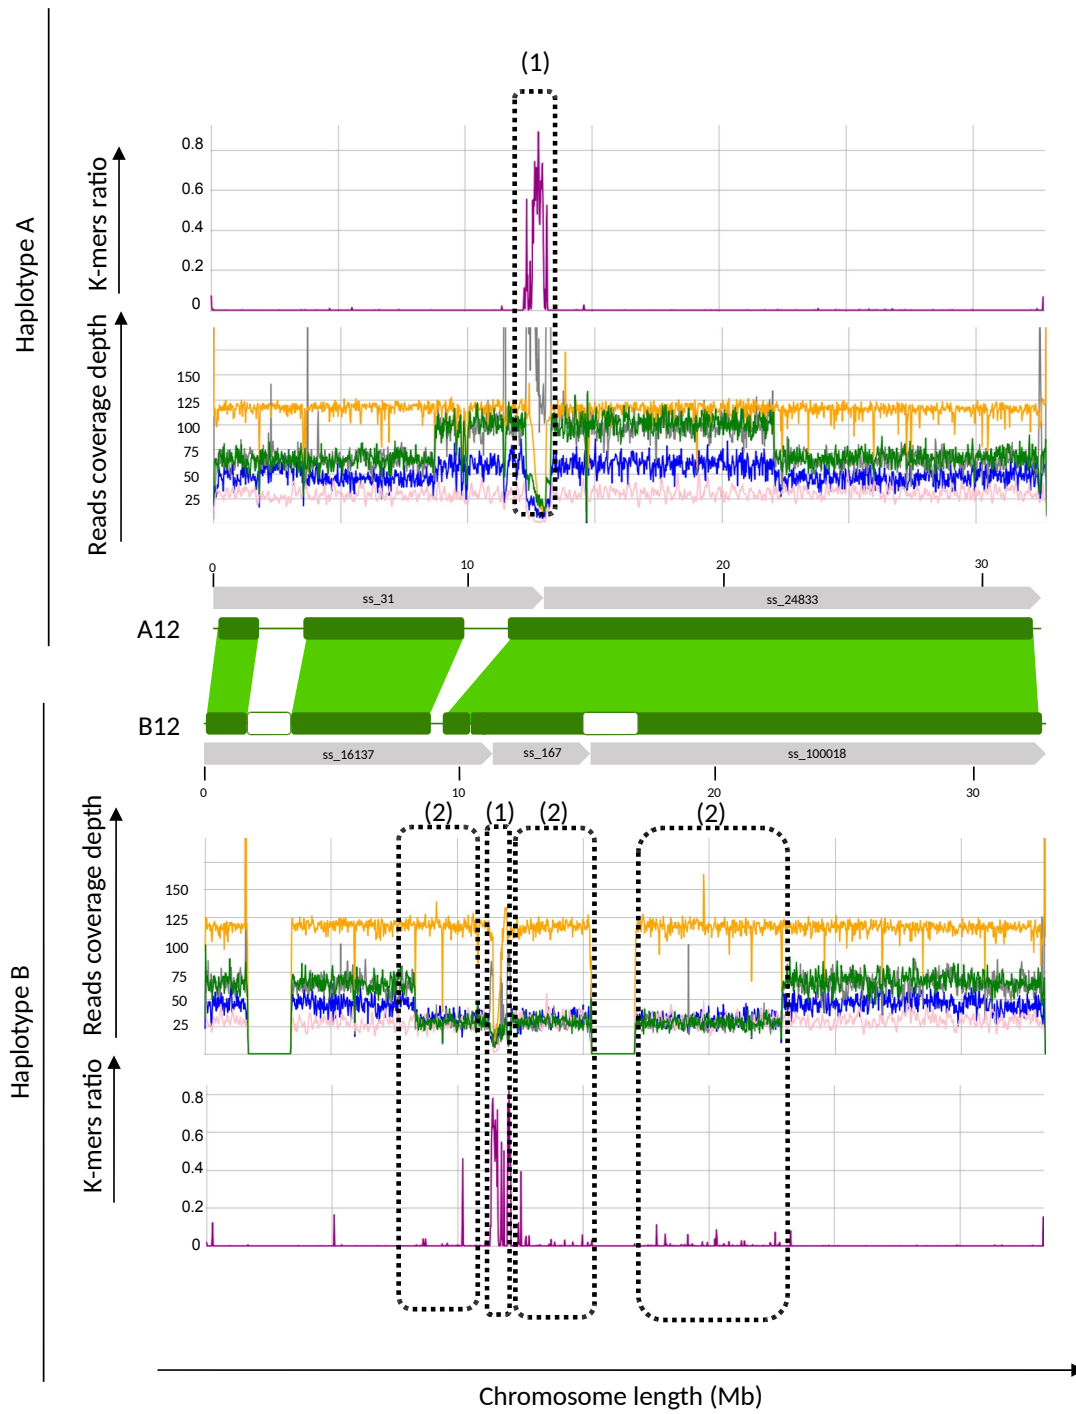

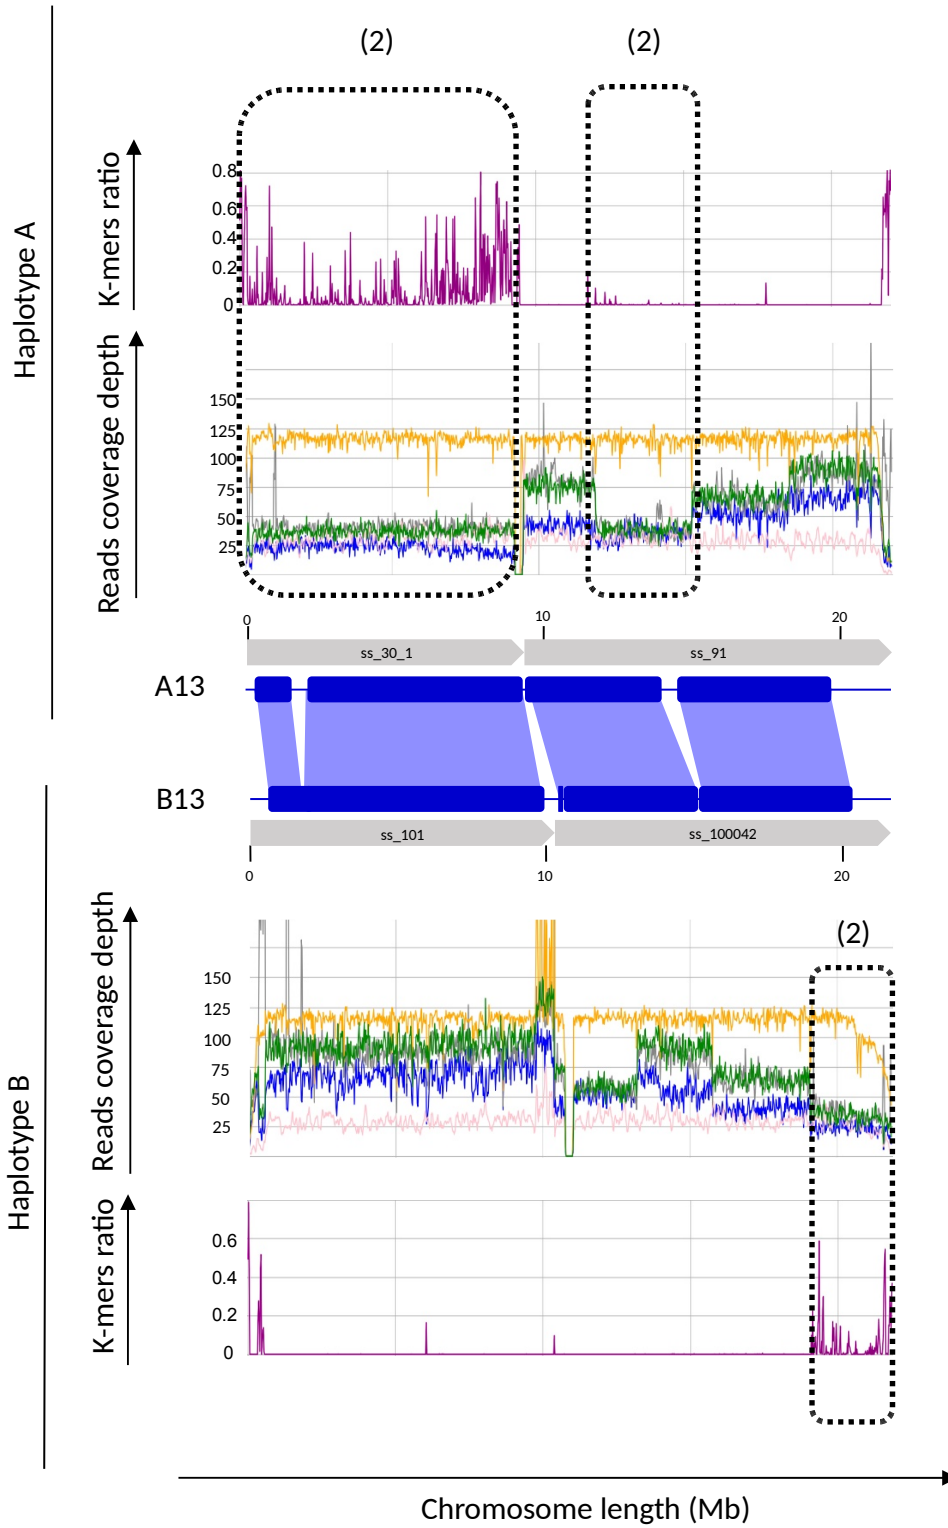

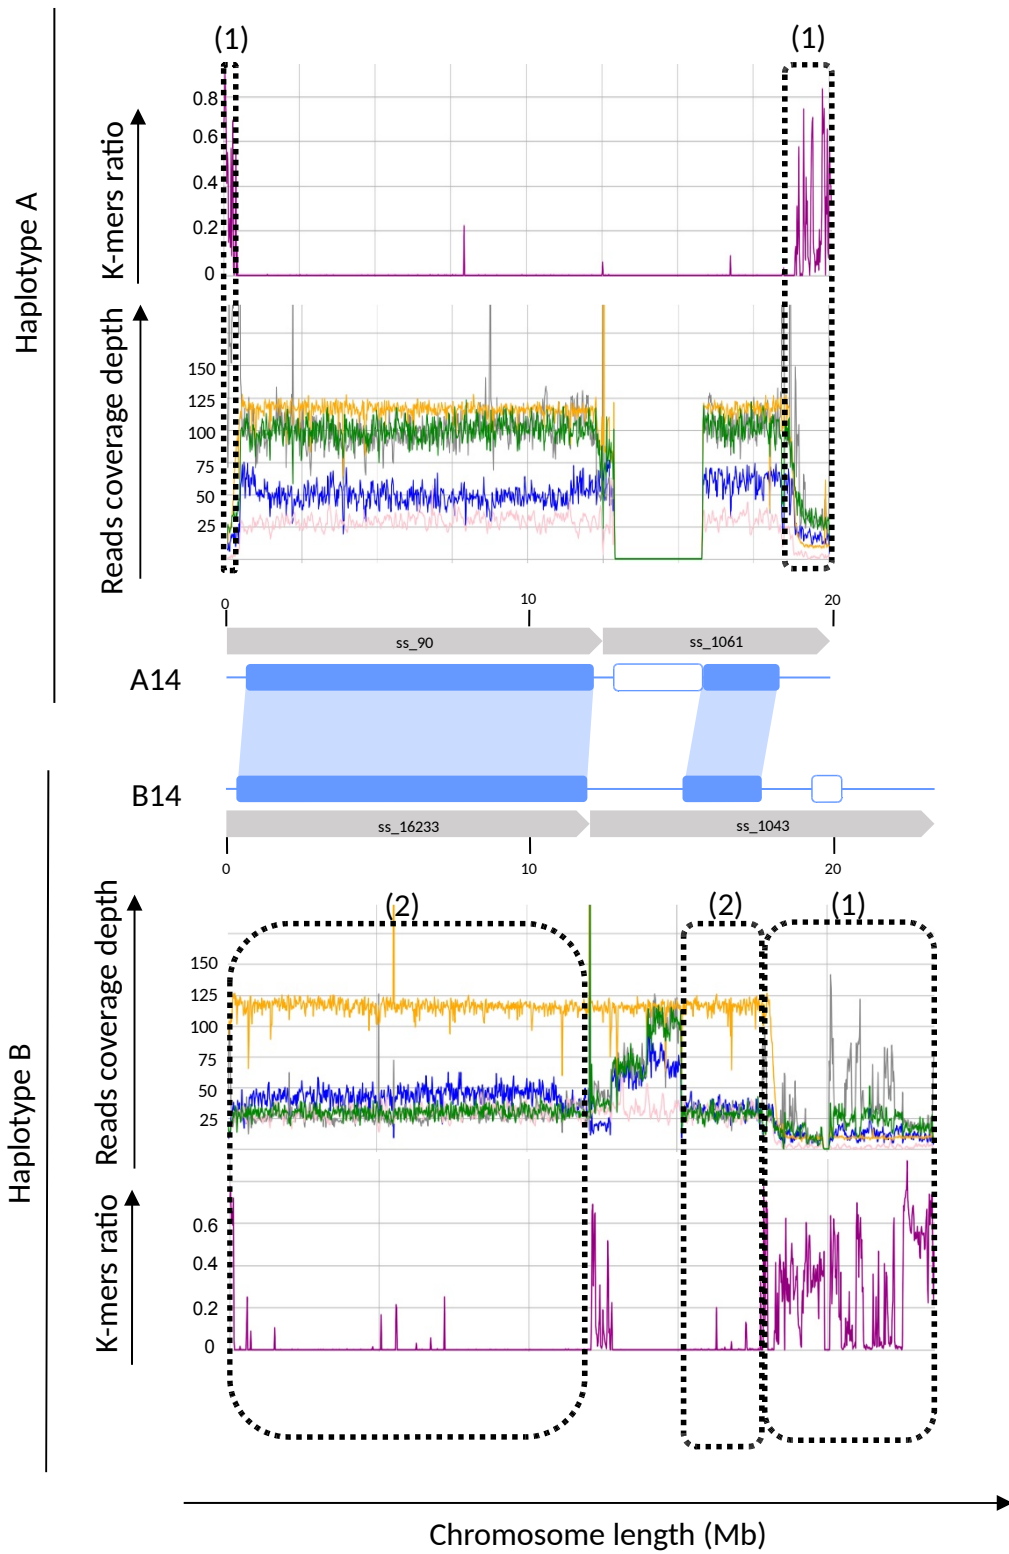

**A**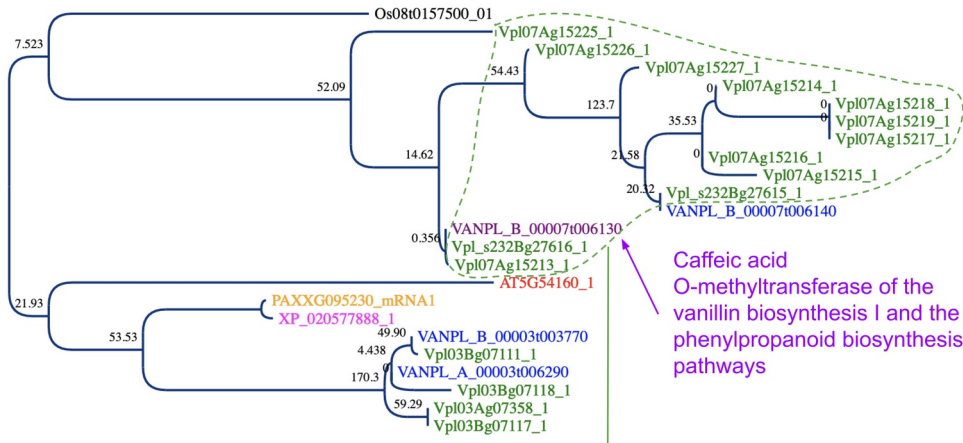

Caffeic acid  
O-methyltransferase of the  
vanillin biosynthesis I and the  
phenylpropanoid biosynthesis  
pathways

**B**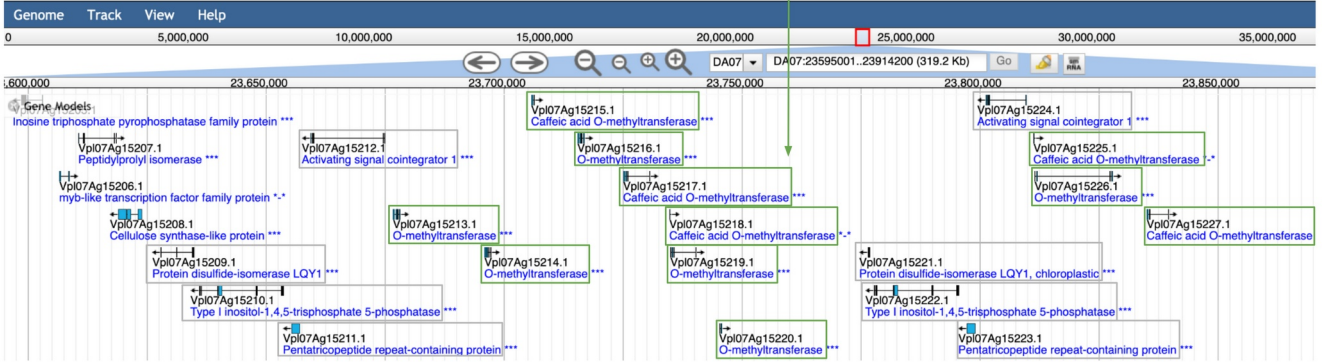**C**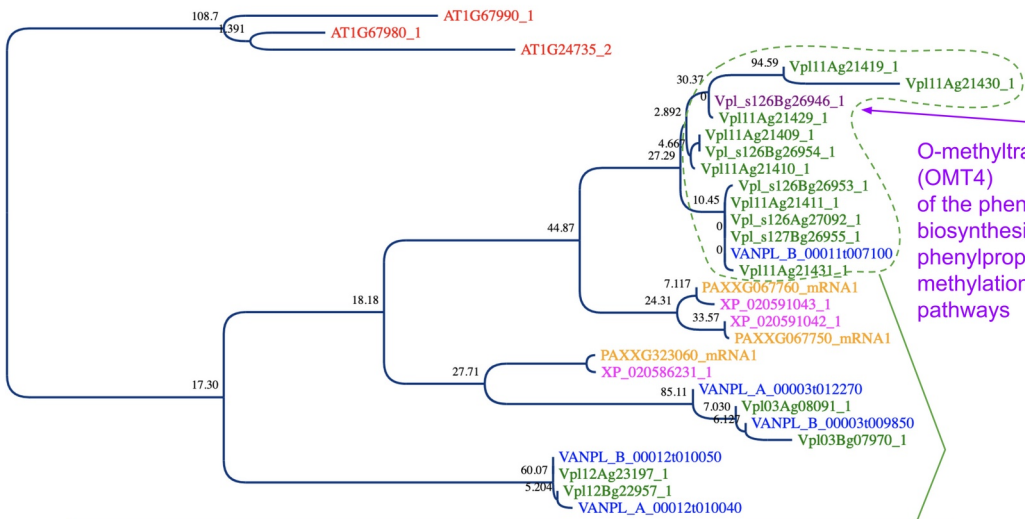

O-methyltransferase  
(OMT4)  
of the phenylpropanoid  
biosynthesis and the  
phenylpropanoids  
methylation (ice plant)  
pathways

**D**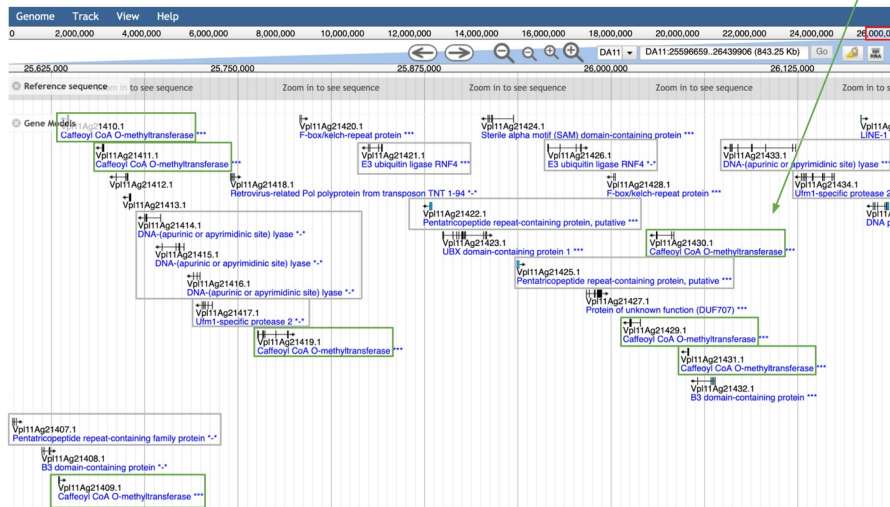

88 Supplemental Figure 11 Caffeic acid O-methyltransferase cluster comparison between  
89 CR0040 and *Daphna*. Phylogenetic trees and genomic positions of clusters of genes encoding  
90 for Caffeic acid O-methyltransferase (A, B; OG0000841; e.g. VANPL\_B\_00007t006130) and  
91 for O-methyltransferase (C, D; OG0000449; e.g. VANPL\_B\_00011t00710  
92 Vpl\_s126Bg26946.1). JBrowse screenshots were done from <https://vanilla-genome->  
93 [hub.cirad.fr/content/v-planifolia-daphna](https://vanilla-genome-hub.cirad.fr/content/v-planifolia-daphna), DA07:23595079..23914278 (319.2 Kb) and  
94 DA11:25632407..26200506 (568.1 Kb).

## 1 Supplemental tables

### 2 Supplemental Table 1 Nuclear classes in flow cytometry samples from *Vanilla planifolia* CR0040 3 nodal tissues

| Nuclear populations                                                | 2C               | 4E           | 8E            | 16E         | 32E          |
|--------------------------------------------------------------------|------------------|--------------|---------------|-------------|--------------|
| Proportion Frequency (%), mean<br>(sd) of 13 independent measures) | 17.31<br>(10.08) | 18.52 (7.21) | 33.95 (11.41) | 21.5 (7.84) | 8.72 (12.73) |
| Mean (sd) of previous interpeak<br>ratio* (Brown et al., 2017)     |                  | 1.28 (0.01)  | 1.44 (0.02)   | 1.62 (0.03) | 1.75 (0.02)  |
| Mean (sd) of interpeak ratio*                                      |                  | 1.30 (0.03)  | 1.42 (0.03)   | 1.61 (0.02) | 1.73 (0.08)  |

4 \* Interpeak Ratio is the fluorescence intensity (I, arbitrary units) of peak n to peak (n — 1).

5 sd, standard deviation.

6 Supplemental Table 2 Main statistics of sequencing data production

| Technology  | Instrument  | Sample type | Number of sequences | Raw data (Gb) | N50 (Kb) |
|-------------|-------------|-------------|---------------------|---------------|----------|
| Illumina    | HiSeq3000   | DNA 10X     | 1,363,939,362       | 205           | 0.15     |
|             |             | genomics    |                     |               |          |
| ONT         | GridION     | DNA         | 2,855,136           | 16            | 13       |
| ONT         | PromethION  | DNA         | 18,044,495          | 131           | 18       |
| Pacific     | Sequel II   | DNA         | 15,306,231          | 1,178         | 15.2*    |
| BioSciences |             |             |                     |               |          |
| Illumina    | NovaSeq6000 | mRNA        | 857,606,502         | 129           | 0.15     |

7 Gb, giga bases ; Kb, kilo bases.

8 \*N50 for 69.75 Gb of HiFi reads

9 Supplemental Table 3 Main metrics of CR0040 genome assemblies

|                      | 10X     | ONT    | PacBio HiFi | Meta-assembly |
|----------------------|---------|--------|-------------|---------------|
| Input data           | 200 Gb  | 150 Gb | 69 Gb       |               |
| Estimated coverage   | 100X    | 75X    | 35X         |               |
| Cumulative size (Gb) | 1.68    | 1.9    | 3.4         | 3.3           |
| Contig number        | 254,400 | 21,443 | 24,534      | 180,957       |
| N50 (kb)             | 25      | 115    | 924         | 133           |
| Max size (Mb)        | 9.6     | 23.4   | 31          | 28.7          |

10 Gb, giga bases ; Kb, kilo bases ; Mb, mega bases.



11 Supplemental Table 4 Main metrics for the best genome assembly

|                      | All contigs | Hybrid<br>scaffolds | Contigs not<br>scaffolded | Haplotype A | Haplotype B |
|----------------------|-------------|---------------------|---------------------------|-------------|-------------|
| Cumulative size (Gb) | 3.4         | 1.9                 | 1.5                       | 1.5         | 1.9         |
| Numbers              | 24,534      | 874                 | 23,037                    | 3,874       | 17,655      |
| N50 (Mb)             | 0.92        | 6.2                 | 0.09                      | 3           | 0.4         |
| Max Size (Mb)        | 31          | 32                  | 10                        | 73          | 69          |
| N's (Mb)             | 0           | 79                  | 0                         | 37          | 40          |

12 Gb, giga bases ; Mb, mega bases.

13 Supplemental Table 5 Genic completeness for CR0040 genome

|                                        | Haplotype A   | Haplotype B   | Haplotypes A+B |
|----------------------------------------|---------------|---------------|----------------|
| <b>Genes in Viridiplantae database</b> | 425           | 425           | 425            |
| Complete single-copy                   | 379 (89.2%)   | 367 (86.4%)   | 17 (4%)        |
| Complete duplicated                    | 17 (4.0%)     | 17 (4%)       | 395 (92.9%)    |
| Fragment                               | 1 (0.2%)      | 27 (6.4%)     | 1 (0.2%)       |
| Missing                                | 28 (6.6%)     | 14 (3.3%)     | 12 (2.9%)      |
| <b>Genes in Embryophyta database</b>   | 1,614         | 1,614         | 1,614          |
| Complete single-copy                   | 1,436 (89%)   | 1,410 (87.4%) | 182 (11.3%)    |
| Complete duplicated                    | 53 (3.3%)     | 86 (5.3%)     | 1,367 (84.7%)  |
| Fragment                               | 13 (0.8%)     | 20 (1.2%)     | 13 (0.8%)      |
| Missing                                | 112 (6.9%)    | 98 (6.1%)     | 52 (3.2%)      |
| <b>Genes in Liliopsida database</b>    | 3,236         | 3,236         | 3,236          |
| Complete single-copy                   | 2,639 (81.6%) | 2,589 (80%)   | 402 (12.4%)    |
| Complete duplicated                    | 111 (3.4%)    | 174 (5.4%)    | 2,475 (76.5%)  |
| Fragment                               | 223 (6.9%)    | 249 (7.7%)    | 230 (7.1%)     |
| Missing                                | 263 (8.1%)    | 224 (6.9%)    | 129 (4%)       |

14 Supplemental Table 6 Main characteristics of RNA samples

| BioSample accession | Tissue      | Nanodrop concentration (ng/ $\mu$ L) | RNA Integrity Number |
|---------------------|-------------|--------------------------------------|----------------------|
| SAMN20691786        | Fruit       | 32.02                                | 8.7                  |
| SAMN20691787        | Leaf        | 119.00                               | 8.1                  |
| SAMN20691788        | Flower      | 121.50                               | 8.7                  |
| SAMN20691789        | Stem        | 47.55                                | 8.8                  |
| SAMN20691790        | Soil root   | 179.40                               | 9.1                  |
| SAMN20691791        | Aerial root | 98.32                                | 8.0                  |
| SAMN20691792        | Bud         | 326.80                               | 9.1                  |
| SAMN20691793        | Flower bud  | 112.70                               | 9.4                  |
| SAMN20691794        | Ovary       | 91.66                                | 9.0                  |
| SAMN20691795        | Mix         | 57.28                                | 8.5                  |

15 Supplemental Table 7 Main statistics of RNA-seq experiment

|               | Number of<br>reads | Alignment<br>rate (%) | Number of<br>transcripts | Mean transcript size<br>(bases) |
|---------------|--------------------|-----------------------|--------------------------|---------------------------------|
| Bud           | 47,018,576         | 93.84                 | 90,813                   | 2,049                           |
| Flower bud    | 49,472,733         | 92.87                 | 86,515                   | 1,971                           |
| Aerial roots  | 40,920,676         | 82.19                 | 81,970                   | 1,905                           |
| Leaves        | 40,129,580         | 93.55                 | 79,462                   | 1,959                           |
| Flowers       | 33,920,088         | 92.68                 | 75,827                   | 1,966                           |
| Fruits        | 32,941,273         | 89.28                 | 72,767                   | 1,903                           |
| Ovary         | 43,083,064         | 93.53                 | 83,388                   | 2,101                           |
| Soil root     | 43,969,059         | 90.39                 | 85,318                   | 2,063                           |
| Stem          | 43,692,744         | 92.60                 | 85,396                   | 1,932                           |
| Mixed tissues | 53,655,458         | 90.12                 | 92,217                   | 1,989                           |

16 Supplemental Table 8 Genic completeness for transcriptomes (BUSCO)

|                       | Complete<br>single-copy | Complete<br>duplicated | Fragment  | Missing   |
|-----------------------|-------------------------|------------------------|-----------|-----------|
| Bud                   | 5 (1.2%)                | 409 (96.2%)            | 1 (0.2%)  | 10 (2.4%) |
| Flower bud            | 4 (0.9%)                | 410 (96.5%)            | 1 (0.2%)  | 10 (2.4%) |
| Aerial roots          | 14 (3.3%)               | 392 (92.2%)            | 5 (1.2%)  | 14 (3.3%) |
| Leaves                | 7 (1.6%)                | 404 (95.1%)            | 1 (0.2%)  | 13 (3.1%) |
| Flowers               | 29 (6.8%)               | 362 (85.2%)            | 15 (3.5%) | 19 (4.5%) |
| Fruits                | 37 (8.7%)               | 348 (81.9%)            | 15 (3.5%) | 25 (5.9%) |
| Ovary                 | 11 (2.6%)               | 400 (94.1%)            | 3 (0.7%)  | 11 (2.6%) |
| Soil root             | 9 (2.1%)                | 402 (94.6%)            | 2 (0.5%)  | 12 (2.8%) |
| Stem                  | 7 (1.6%)                | 405 (95.3%)            | 2 (0.5%)  | 11 (2.6%) |
| Mixed tissues         | 7 (1.6%)                | 407 (95.8%)            | 1 (0.2%)  | 10 (2.4%) |
| Merged transcriptomes | 2 (0.5%)                | 412 (96.9%)            | 1 (0.2%)  | 10 (2.4%) |

17 Supplemental Table 9 Summary statistics of protein coding genes per haplotype

|                                  | Haplotype A | Haplotype B |
|----------------------------------|-------------|-------------|
| Number of protein coding genes   | 26,392      | 32,736      |
| Number of exons                  | 140,181     | 158,279     |
| Mean gene length (bp)            | 7,865       | 6,692       |
| Mean exon length (bp)            | 269         | 269         |
| Mean number of exons per mRNA    | 5.3         | 4.8         |
| Number of single exon gene       | 5,097       | 7,460       |
| Mean coding sequence length (bp) | 1,072       | 995         |
| Mean protein length (aa)         | 356         | 331         |
| Orthologs 1 to 1                 | 15,844      | 15,844      |
| Orthologs 1 to many              | 1,335       | 1,999       |
| Orthologs many to 1              | 6,052       | 4,721       |
| Orthologs many to many           | 847         | 704         |
| Haplotype A specific orthologs   | 742         | -           |
| Haplotype B specific orthologs   | -           | 4,724       |
| Orthogroups unassigned genes     | 985         | 4,515       |

18 bp, base pairs ; aa, amino acid.

19 Supplemental Table 10 Genic completeness for CR0040 annotation with BUSCO

| BUSCO 5.0.0                            | Haplotype A   | Haplotype B   | Haplotype A+B |
|----------------------------------------|---------------|---------------|---------------|
|                                        | 26392         | 32736         | 59128         |
| <b>Genes in Viridiplantae database</b> | 425           | 425           | 425           |
| Complete single-copy                   | 343 (80.7%)   | 337 (79.3%)   | 65 (15.3%)    |
| Complete duplicated                    | 18 (4.2%)     | 27 (6.4%)     | 331 (77.9%)   |
| Fragment                               | 26 (6.1%)     | 29 (6.8%)     | 13 (3.1%)     |
| Missing                                | 38 (9.0%)     | 32 (7.5%)     | 16 (3.7%)     |
| <b>Genes in Embryophyta database</b>   | 1,614         | 1,614         | 1,614         |
| Complete single-copy                   | 1,292 (80.0%) | 1,271 (78.7%) | 231 (14.3%)   |
| Complete duplicated                    | 56 (3.5%)     | 95 (5.9%)     | 1,245 (77.1%) |
| Fragment                               | 88 (5.5%)     | 79 (4.9%)     | 54 (3.3%)     |
| Missing                                | 178 (11%)     | 169 (10.5%)   | 84 (5.3%)     |
| <b>Genes in Liliopsida database</b>    | 3,236         | 3,236         | 3,236         |
| Complete single-copy                   | 2,383 (73.6%) | 2,354 (72.7%) | 539 (16.7%)   |
| Complete duplicated                    | 106 (3.3%)    | 187 (5.8%)    | 2,270 (70.1%) |
| Fragment                               | 313 (9.7%)    | 310 (9.6%)    | 222 (6.9%)    |
| Missing                                | 434 (13.4%)   | 385 (11.9%)   | 205 (6.3%)    |

20 Supplemental Table 11 RepeatMasker summary report

|                    | Haplotype<br>A (nb) | Haplotype<br>B (nb) | Haplotype<br>A (Mb) | Haplotype<br>B (Mb) | Haplotyp<br>e A<br>(%bp) | Haplotyp<br>e B<br>(%bp) | Haplotype<br>A+B<br>(%bp) |
|--------------------|---------------------|---------------------|---------------------|---------------------|--------------------------|--------------------------|---------------------------|
| Total interspersed |                     |                     |                     |                     |                          |                          |                           |
| repeats            | 914,993             | 1,270,877           | 659.98              | 930.76              | 46.6                     | 47.3                     | 47.0                      |
| Total              |                     |                     |                     |                     |                          |                          |                           |
| retroelements      | 690,136             | 992,412             | 577.09              | 827.14              | 40.7                     | 42.0                     | 41.5                      |
| Total LTR          | 378,082             | 563,026             | 229.77              | 344.86              | 16.2                     | 17.5                     | 17.0                      |
| LTR/Copia          | 134,148             | 173,060             | 89.02               | 118.81              | 6.3                      | 6.0                      | 6.1                       |
| LTR/Gypsi          | 209,894             | 346,287             | 123.85              | 203.4               | 8.7                      | 10.3                     | 9.7                       |
| LINES              | 136,139             | 170,984             | 168.91              | 236.34              | 11.9                     | 12.0                     | 12.0                      |
| Unclassified       |                     |                     |                     |                     |                          |                          |                           |
| retroelements      | 170,906             | 252,117             | 177.45              | 244.74              | 12.5                     | 12.4                     | 12.5                      |
| SINE               | 5,009               | 6,285               | 0.96                | 1.2                 | 0.1                      | 0.1                      | 0.1                       |
| DNA transposons    | 64,797              | 79,501              | 21.8                | 26.44               | 1.5                      | 1.4                      | 1.4                       |
| Unclassified       |                     |                     |                     |                     |                          |                          |                           |
| repeats            | 159,752             | 198,616             | 61.03               | 77.12               | 4.3                      | 3.9                      | 4.1                       |
| Simple repeats     | 306,532             | 477,099             | 191.41              | 330.64              | 13.5                     | 16.8                     | 15.4                      |
| Low complexity     |                     |                     |                     |                     |                          |                          |                           |
| regions            | 58,671              | 77,463              | 129.99              | 197.09              | 9.18                     | 10.0                     | 9.7                       |

21 nb, number ; Mb, mega bases ; bp, base pairs.



22 Supplemental Table 12 Number and repartition of protein coding genes and repeats per  
 23 chromosome and per haplotype of CR0040

| Chr    | CR0040 Haplotype A |                 |        |                            |       | CR0040 Haplotype B |        |        |                            |       |
|--------|--------------------|-----------------|--------|----------------------------|-------|--------------------|--------|--------|----------------------------|-------|
|        | w N                | wo N            | genes  | cds wo N TEs wo N<br>(%bp) | (%bp) | w N                | wo N   | genes  | cds wo N TEs wo N<br>(%bp) | (%bp) |
| 1      | 73.50              | 70.63           | 3,532  | 6.12                       | 30.16 | 68.78              | 62.17  | 3,293  | 6.55                       | 27.95 |
| 2      | 42.59              | 42.57           | 1,426  | 4.14                       | 39.09 | 37.53              | 37.47  | 1,375  | 4.73                       | 35.03 |
| 3      | 41.87              | 41.79           | 1,341  | 3.95                       | 43.63 | 40.03              | 35.97  | 1,095  | 3.72                       | 43.54 |
| 4      | 36.44              | 36.24           | 1,179  | 4.05                       | 40.06 | 44.10              | 43.14  | 1,429  | 4.12                       | 40.53 |
| 5      | 44.52              | 44.52           | 1,907  | 5.36                       | 31.34 | 42.22              | 38.80  | 1,777  | 5.66                       | 30.64 |
| 6      | 42.39              | 42.39           | 1,346  | 3.98                       | 36.93 | 24.06              | 23.18  | 933    | 5.08                       | 35.12 |
| 7      | 39.34              | 38.93           | 1,455  | 4.50                       | 40.82 | 33.37              | 33.15  | 1,307  | 4.85                       | 38.37 |
| 8      | 31.38              | 31.38           | 1,229  | 4.89                       | 35.05 | 28.94              | 28.93  | 1,225  | 5.26                       | 33.21 |
| 9      | 33.51              | 33.50           | 1,336  | 4.79                       | 37.56 | 31.37              | 30.67  | 1,354  | 5.21                       | 36.04 |
| 10     | 32.65              | 32.65           | 1,240  | 4.58                       | 35.05 | 32.20              | 32.01  | 1,184  | 4.62                       | 34.77 |
| 11     | 47.22              | 32.47           | 1,228  | 4.48                       | 40.81 | 31.72              | 31.72  | 1,179  | 4.63                       | 37.93 |
| 12     | 32.78              | 32.76           | 1,276  | 4.89                       | 34.45 | 33.34              | 29.92  | 1,279  | 5.27                       | 33.50 |
| 13     | 22.01              | 21.81           | 1,007  | 5.48                       | 36.55 | 21.85              | 21.59  | 981    | 5.57                       | 36.18 |
| 14     | 20.09              | 17.17           | 695    | 4.85                       | 36.22 | 23.58              | 23.33  | 977    | 4.75                       | 39.58 |
| 1-14   | 540.27             | 518.80          | 20,197 | 4.77                       | 36.61 | 493.10             | 472.06 | 19,388 | 5.03                       | 35.56 |
| 0      | 876.47             | 860.02          | 6195   | 0.41                       | 47.33 | 1,476.301,455.48   | 13,348 | 0.60   | 46.97                      |       |
| 1-14-0 | <b>1,416.74</b>    | <b>1,378.82</b> | 26,392 | 2.05                       | 43.30 | 1,969.401,927.54   | 32,736 | 1.68   | 44.19                      |       |

24 Pseudomolecules lengths with (w N) and without (wo N) the Ns (any base) nucleotide in Mbp.

25 The percentage of CDS/repeats is calculated as the percentage of bases covered by the CDS/repeats sequences per  
 26 chromosome.

27 Supplemental Table 13 Number and repartition of protein coding genes per chromosome and per  
 28 haplotype of Daphna

| Chr    | Daphna Haplotype A |        |        | Daphna Haplotype B |        |        |
|--------|--------------------|--------|--------|--------------------|--------|--------|
|        | w N                | wo N   | genes  | w N                | wo N   | genes  |
| 1      | 88.30              | 88.28  | 4,619  | 83.42              | 83.40  | 4,177  |
| 2      | 72.75              | 72.74  | 1,962  | 76.19              | 76.18  | 2,126  |
| 3      | 50.16              | 50.15  | 1,670  | 54.87              | 54.86  | 1,781  |
| 4      | 50.01              | 50.00  | 1,817  | 52.15              | 52.14  | 1,781  |
| 5      | 52.22              | 52.21  | 2,571  | 52.41              | 52.40  | 2,391  |
| 6      | 48.33              | 48.32  | 1,739  | 43.88              | 43.87  | 1,673  |
| 7      | 42.01              | 42.00  | 1,722  | 40.07              | 40.06  | 1,555  |
| 8      | 35.52              | 35.52  | 1,538  | 34.78              | 34.77  | 1,583  |
| 9      | 35.31              | 35.31  | 1,681  | 37.56              | 37.56  | 1,661  |
| 10     | 35.05              | 35.04  | 1,314  | 37.45              | 37.44  | 1,494  |
| 11     | 37.57              | 37.56  | 1,410  | 40.79              | 40.78  | 1,504  |
| 12     | 41.05              | 41.04  | 1,712  | 40.14              | 40.13  | 1,738  |
| 13     | 27.55              | 27.55  | 1,213  | 25.81              | 25.80  | 1,210  |
| 14     | 23.25              | 23.25  | 1,066  | 22.80              | 22.80  | 1,093  |
| 1-14   | 639.09             | 638.96 | 26,034 | 642.33             | 642.19 | 25,767 |
| 0      | 97.73              | 97.66  | 3133   | 101.93             | 101.87 | 3413   |
| 1-14-0 | 736.82             | 736.62 | 29,167 | 744.26             | 744.06 | 29,180 |

29 Pseudomolecules lengths with (w N) and without (wo N) the Ns (any base) nucleotide in Mbp.

## 30 Supplemental Table 14 Conserved and specific gene groups

|                               | Gene<br>number | Genes in<br>orthogroups | Number of<br>conserved<br>orthogroups | Number of<br>specific<br>orthogroups | Number of<br>specific<br>singleton genes |
|-------------------------------|----------------|-------------------------|---------------------------------------|--------------------------------------|------------------------------------------|
| CR0040 Haplotype A            | 26,392         | 25,779                  | 15,916                                | 88                                   | 613                                      |
| CR0040 Haplotype B            | 32,736         | 29,689                  | 16,211                                | 899                                  | 3,047                                    |
| Daphna Haplotype A            | 29,167         | 26,506                  | 17,131                                | 135                                  | 2,661                                    |
| Daphna Haplotype B            | 29,180         | 26,478                  | 17,060                                | 109                                  | 2,702                                    |
| <i>Phalaenopsis equestris</i> | 20,081         | 19,662                  | 13,045                                | 79                                   | 419                                      |
| <i>Phalaenopsis aphrodite</i> | 28,903         | 27,946                  | 13,322                                | 288                                  | 957                                      |
| <i>Oryza sativa</i>           | 43,770         | 32,466                  | 12,081                                | 2,731                                | 11,304                                   |

## 31 Supplemental Table 15 Sequencing depth of CR0040 genome per technology

|       | Haplotype A |        |          | Haplotype B |       |          |
|-------|-------------|--------|----------|-------------|-------|----------|
|       | PacBio HiFi | ONT    | Illumina | PacBio HiFi | ONT   | Illumina |
| Chr0  | 10.97       | 19.08  | 50.55    | 9.62        | 15.74 | 45.26    |
| Chr1  | 45.53       | 64.55  | 73.13    | 38.93       | 55.94 | 62.44    |
| Chr2  | 51.98       | 73.30  | 75.01    | 34.81       | 49.41 | 51.10    |
| Chr3  | 51.47       | 81.00  | 83.68    | 33.91       | 43.69 | 45.16    |
| Chr4  | 56.02       | 74.51  | 76.93    | 32.98       | 55.89 | 58.90    |
| Chr5  | 53.17       | 82.57  | 87.21    | 34.24       | 43.53 | 50.84    |
| Chr6  | 71.49       | 103.11 | 102.67   | 17.30       | 24.86 | 26.50    |
| Chr7  | 50.15       | 34.58  | 55.71    | 54.54       | 74.65 | 76.21    |
| Chr8  | 47.15       | 68.15  | 68.65    | 56.91       | 41.25 | 62.25    |
| Chr9  | 46.44       | 69.27  | 74.45    | 37.00       | 49.75 | 53.92    |
| Chr10 | 46.74       | 74.06  | 80.02    | 41.63       | 51.10 | 53.22    |
| Chr11 | 24.79       | 36.80  | 42.83    | 49.90       | 73.66 | 74.02    |
| Chr12 | 50.19       | 77.09  | 87.36    | 35.28       | 44.44 | 44.44    |
| Chr13 | 36.78       | 52.40  | 55.33    | 53.44       | 75.91 | 76.66    |
| Chr14 | 40.99       | 78.69  | 86.60    | 35.22       | 32.76 | 37.31    |

## 32 Supplemental Table 16 Sequencing depth of CR0040 genome using Daphna data sequences

|       | Haplotype A |          | Haplotype B |          |
|-------|-------------|----------|-------------|----------|
|       | ONT         | Illumina | ONT         | Illumina |
| Chr0  | 2.50        | 17.93    | 3.18        | 24.05    |
| Chr1  | 28.40       | 106.18   | 27.12       | 101.70   |
| Chr2  | 26.85       | 104.49   | 28.96       | 112.48   |
| Chr3  | 28.71       | 114.75   | 25.02       | 105.23   |
| Chr4  | 27.21       | 108.87   | 27.74       | 112.54   |
| Chr5  | 29.20       | 110.89   | 28.37       | 107.20   |
| Chr6  | 31.17       | 116.08   | 27.51       | 106.37   |
| Chr7  | 26.00       | 100.27   | 28.48       | 110.39   |
| Chr8  | 27.39       | 108.01   | 29.08       | 115.18   |
| Chr9  | 26.45       | 102.54   | 26.89       | 104.81   |
| Chr10 | 28.53       | 110.27   | 28.93       | 113.21   |
| Chr11 | 17.10       | 66.85    | 29.10       | 111.80   |
| Chr12 | 29.42       | 114.87   | 26.51       | 103.46   |
| Chr13 | 29.32       | 112.36   | 28.49       | 111.60   |
| Chr14 | 22.67       | 90.23    | 23.43       | 91.57    |

33 Supplemental Table 17 Cell cycle regulation genes found in CR0040 genome

|           |                        | <i>A. thaliana</i>       | CR0040 haplotype A       | CR0040 haplotype B       | <i>P. aphrodite</i>      |                 |
|-----------|------------------------|--------------------------|--------------------------|--------------------------|--------------------------|-----------------|
| CDKs      | CDKA                   | At3g48750                | VANPL_A_00001t01<br>2310 | VANPL_B_00001t01<br>1840 | PAXXG23147<br>0          |                 |
|           |                        |                          | VANPL_A_00014t00<br>5470 | VANPL_B_00014t00<br>7380 |                          |                 |
|           |                        | CDKB                     | At3g54180                | VANPL_A_00007t00<br>8490 | VANPL_B_00007t00<br>7640 | PAXXG08972<br>0 |
|           |                        |                          | At2g38620                | VANPL_A_00009t00<br>1400 | VANPL_B_00009t00<br>1350 | PAXXG11392<br>0 |
|           | At1g76540<br>At1g20930 |                          |                          |                          |                          |                 |
|           | <hr/>                  |                          |                          |                          |                          |                 |
|           | CYCs                   |                          |                          |                          |                          |                 |
|           |                        | CYCA                     | At1g80370                | VANPL_A_00008t01<br>1460 | VANPL_B_00004t01<br>2020 | PAXXG00804<br>0 |
|           |                        |                          | At1g15570                | VANPL_A_00005t00<br>0960 | VANPL_00313t0006<br>20   | PAXXG18301<br>0 |
|           |                        |                          | At5g25380                |                          | VANPL_B_00008t01<br>1460 | PAXXG05402<br>0 |
| At5g11300 |                        |                          |                          | VANPL_B_00005t00<br>1350 |                          |                 |
| At5g43080 |                        |                          |                          |                          |                          |                 |
| At1g47210 |                        |                          |                          |                          |                          |                 |
| At1g47220 |                        |                          |                          |                          |                          |                 |
| At1g47230 |                        |                          |                          |                          |                          |                 |
| CYCB      |                        | AT4G34160                |                          |                          |                          |                 |
|           |                        | At4g37490                | VANPL_A_00001t01<br>1770 | VANPL_B_00001t01<br>1320 | PAXXG00075<br>0          |                 |
|           | At5g06150              | VANPL_A_00001t02<br>4950 | VANPL_B_00001t01<br>9080 | PAXXG15655<br>0          |                          |                 |
|           | At3g11520              | VANPL_00050t0007<br>50   | VANPL_B_00001t01<br>1320 | PAXXG22889<br>0          |                          |                 |

|              |           |                          |                          |                 |
|--------------|-----------|--------------------------|--------------------------|-----------------|
|              | At2g26760 | VANPL_A_00001t01<br>9600 | VANPL_B_00005t00<br>0920 | PAXXG02847<br>0 |
|              | At1g34460 | VANPL_A_00001t01<br>1770 |                          | PAXXG00075<br>0 |
|              | At4g35620 | VANPL_A_00001t02<br>4950 |                          | PAXXG15655<br>0 |
|              | At2g17620 | VANPL_00050t0007<br>50   |                          | PAXXG21987<br>0 |
|              | At1g16330 | VANPL_A_00005t00<br>0640 |                          |                 |
|              |           | VANPL_A_00005t00<br>0650 |                          |                 |
|              |           | VANPL_A_00005t00<br>0650 |                          |                 |
|              | CYCD3-1   | At4g34160                |                          |                 |
| FZR (CCS52A) | At4g22910 | VANPL_A_00010t00<br>4300 | VANPL_B_00010t00<br>4420 | PAXXG07698<br>0 |
|              | At4g11920 | VANPL_A_00001t01<br>2550 | VANPL_B_00001t01<br>2090 | PAXXG08408<br>0 |
|              | At5g13840 |                          | VANPL_13258t0000<br>30   | PAXXG08252<br>0 |
| WEE1         | At1g02970 | VANPL_A_00011t01<br>0580 | VANPL_B_00011t01<br>0080 | PATC144561      |
| KRP          | At2g23430 | VANPL_A_00008t00<br>3440 | VANPL_B_00006t00<br>3720 | PAXXG04855<br>0 |
|              | At3g50630 | VANPL_A_00004t00<br>6200 | VANPL_B_00008t00<br>3330 | PAXXG11133<br>0 |
|              | At5g48820 | VANPL_A_00002t00<br>6250 | VANPL_B_00004t00<br>6400 | PAXXG29015<br>0 |
|              | At2g32710 | VANPL_A_00001t03<br>1310 | VANPL_B_00002t00<br>6550 | PAXXG11558<br>0 |
|              | At3g24810 |                          | VANPL_B_00001t02<br>8840 |                 |
|              | At3g19150 |                          | VANPL_B_00001t02<br>0090 |                 |
|              | At1g49620 |                          | VANPL_00053t0015<br>50   |                 |
| ILP1         | At5g08550 | VANPL_A_00012t0057<br>30 | VANPL_B_00012t0056<br>80 | PAXXG094170     |
| ADF          | At3g46010 | VANPL_A_00010t0019<br>00 | VANPL_B_00009t0089<br>80 | PAXXG101780     |
|              | At3g46000 | VANPL_A_00011t0036<br>50 | VANPL_B_00010t0018<br>60 | PAXXG066610     |
|              | At5g59880 | VANPL_A_00009t0086<br>90 | VANPL_B_00002t0035<br>60 | PAXXG194280     |

|           |                          |                          |             |
|-----------|--------------------------|--------------------------|-------------|
| At5g59890 | VANPL_A_00001t0193<br>80 | VANPL_B_00009t0023<br>90 | PAXXG119700 |
| At2g16700 | VANPL_A_00002t0036<br>20 | VANPL_B_00001t0121<br>50 | PAXXG241790 |
| At2g31200 | VANPL_A_00014t0042<br>00 | VANPL_B_00011t0036<br>80 | PAXXG043520 |
| At4g25590 | VANPL_A_00005t0087<br>70 | VANPL_B_00001t0188<br>50 | PAXXG173900 |
| At4g00680 | VANPL_A_00003t0004<br>30 | VANPL_B_00014t0043<br>30 | PAXXG146670 |
| At4g34970 | VANPL_A_00009t0024<br>90 | VANPL_00170t000390       | PAXXG125360 |
| At1g01750 | VANPL_A_00006t0025<br>70 | VANPL_01089t000240       | PAXXG160710 |
| At3g45990 |                          |                          | PAXXG009590 |
| At5g52360 |                          |                          | PAXXG386760 |
|           |                          |                          | PAXXG302270 |

34 CDKs : Cyclin-Dependent Kinases ; CYCs : Cyclins ; FZR : Fizzy-Related protein ; WEE1 : WEE1 like protein kinase ; KRP : cyclin-dependent  
35 kinase inhibitor ; ILP : Transcriptional repressor ILP1 ; ADF : Actin-Depolymerizing Factor ;
