# Supplementary material for: A chromosome-level, haplotype-phased Vanilla planifolia genome highlights the challenge of partial endoreplication for accurate whole-genome assembly
Source: PubMed Central journal article supplement — Plant Commun. 2022 May 5;3(5):100330. doi: 10.1016/j.xplc.2022.100330 (PMC9482989; doi:10.1016/j.xplc.2022.100330), 2022-05-05
Supplement: mmc2.pdf [file mmc2.pdf]

# A chromosome-level, haplotype-phased *Vanilla planifolia* genome highlights the challenge of partial endoreplication for accurate whole-genome assembly

Quentin Piet<sup>1,17</sup>, Gaetan Droc<sup>2,3,4,17,\*</sup>, William Marande<sup>5,17</sup>, Gautier Sarah<sup>4,6,17</sup>, Stéphanie Bocs<sup>2,3,4,17</sup>, Christophe Klopp<sup>7,17</sup>, Mickael Bourge<sup>8</sup>, Sonja Siljak-Yakovlev<sup>9</sup>, Olivier Bouchez<sup>10</sup>, Céline Lopez-Roques<sup>10</sup>, Sandra Lepers-Andrzejewski<sup>11</sup>, Laurent Bourgois<sup>12</sup>, Joseph Zucca<sup>13</sup>, Michel Dron<sup>14</sup>, Pascale Besse<sup>15</sup>, Michel Grisoni<sup>16,\*</sup>, Cyril Jourda<sup>1,\*</sup> and Carine Charron<sup>1,17</sup>

<sup>1</sup>CIRAD, UMR PVBMT, 97410 Saint-Pierre, La Réunion, France

<sup>2</sup>CIRAD, UMR AGAP Institut, 34398 Montpellier, France

<sup>3</sup>UMR AGAP Institut, Univ Montpellier, CIRAD, INRAE, Institut Agro, 34398 Montpellier, France

<sup>4</sup>French Institute of Bioinformatics (IFB) - South Green Bioinformatics Platform, Bioversity, CIRAD, INRAE, IRD, 34398 Montpellier, France

<sup>5</sup>INRAE, CNRGV, Genotoul, 31326 Castanet-Tolosan, France

<sup>6</sup>AGAP, Univ. Montpellier, CIRAD, INRAE, Montpellier SupAgro, Montpellier, France

<sup>7</sup>Plateforme Bioinformatique, Genotoul, BioinfoMics, UR875 Biométrie et Intelligence Artificielle, INRAE, Castanet-Tolosan, France

<sup>8</sup>Cytometry Facility, Imagerie-Gif, Université Paris-Saclay, CEA, CNRS, Institute for Integrative Biology of the Cell (I2BC), 91198 Gif-sur-Yvette, France

<sup>9</sup>Université Paris-Saclay, CNRS, AgroParisTech, Ecologie Systématique Evolution (ESE), 91190 Gif-sur-Yvette, France

<sup>10</sup>INRAE, GeT-PlaGe, Genotoul, 31326 Castanet-Tolosan, France

<sup>11</sup>Etablissement Vanille de Tahiti, Uturoa, French Polynesia, France

<sup>12</sup>Eurovanille, Rue de Maresquel, 62870 Gouy Saint André, France

<sup>13</sup>Département Biotechnologie, V. Mane Fils, 06620 Le Bar Sur Loup, France

<sup>14</sup>Université Paris-Saclay, CNRS, INRAE, Univ. Evry, Institute of Plant Sciences Paris-Saclay (IPS2), 91405 Orsay, France

<sup>15</sup>Université de la Réunion, UMR PVBMT, Saint-Pierre, La Réunion, France

<sup>16</sup>CIRAD, UMR PVBMT, 501 Tamatave, Madagascar

<sup>17</sup>These authors contributed equally to this article.

\*Correspondence: Gaetan Droc ([gaetan.droc@cirad.fr](mailto:gaetan.droc@cirad.fr)), Michel Grisoni ([michel.grisoni@cirad.fr](mailto:michel.grisoni@cirad.fr)), Cyril Jourda ([cyril.jourda@cirad.fr](mailto:cyril.jourda@cirad.fr))

<https://doi.org/10.1016/j.xplc.2022.100330>

## ABSTRACT

***Vanilla planifolia*, the species cultivated to produce one of the world's most popular flavors, is highly prone to partial genome endoreplication, which leads to highly unbalanced DNA content in cells. We report here the first molecular evidence of partial endoreplication at the chromosome scale by the assembly and annotation of an accurate haplotype-phased genome of *V. planifolia*. Cytogenetic data demonstrated that the diploid genome size is 4.09 Gb, with 16 chromosome pairs, although aneuploid cells are frequently observed. Using PacBio HiFi and optical mapping, we assembled and phased a diploid genome of 3.4 Gb with a scaffold N50 of 1.2 Mb and 59 128 predicted protein-coding genes. The atypical k-mer frequencies and the uneven sequencing depth observed agreed with our expectation of unbalanced genome representation. Sixty-seven percent of the genes were scattered over only 30% of the genome, putatively linking gene-rich regions and the endoreplication phenomenon. By contrast, low-coverage regions (non-endoreplicated) were rich in repeated elements but also contained 33% of the annotated genes. Furthermore, this**

assembly showed distinct haplotype-specific sequencing depth variation patterns, suggesting complex molecular regulation of endoreplication along the chromosomes. This high-quality, anchored assembly represents 83% of the estimated *V. planifolia* genome. It provides a significant step toward the elucidation of this complex genome. To support post-genomics efforts, we developed the Vanilla Genome Hub, a user-friendly integrated web portal that enables centralized access to high-throughput genomic and other omics data and interoperable use of bioinformatics tools.

**Keywords:** vanilla, whole-genome sequencing, optical mapping, partial endoreplication, genome hub

**Piet Q., Droc G., Marande W., Sarah G., Bocs S., Klopp C., Bourge M., Siljak-Yakovlev S., Bouchez O., Lopez-Roques C., Lepers-Andrzejewski S., Bourgeois L., Zucca J., Dron M., Besse P., Grisoni M., Jourda C., and Charron C. (2022).** A chromosome-level, haplotype-phased *Vanilla planifolia* genome highlights the challenge of partial endoreplication for accurate whole-genome assembly. *Plant Comm.* **3**, 100330.

## INTRODUCTION

Endoreplication, characterized by a series of DNA replications in the nucleus without mitotic cell division, is found in a large number of both animal and plant species (Lee et al., 2009). During regular endoreplication, each step of this mechanism leads to a two-fold increase in nuclear DNA content in somatic cells (2C, 4C, 8C, 16C, etc.), where 1C corresponds to the DNA content of the non-replicated holoploid chromosome set. Endoreplication is very common in plants and is related to various biological processes, such as plant development and growth, and occurs in response to biotic and abiotic stresses (Bourdon et al., 2012; Lang and Schnittger, 2020). This phenomenon depends on the type of tissue and its stage of development, suggesting involvement in cell differentiation and maintenance of the final stage of differentiation (Bhosale et al., 2018). The molecular mechanisms involved in regular endoreplication have been particularly well studied in *Arabidopsis thaliana* over the past few years. A downregulation of mitotic activity caused by mitotic cyclin-dependent kinase (CDK)–cyclin complexes has been shown to be directly involved in the control of endoreplication (Lang and Schnittger, 2020).

In many orchid species, measurements of genomic content by flow cytometry (FCM) have not agreed with the commonly accepted model of complete endoreplication. In this case, nuclear DNA content in endoreplicated cells was present at less than twice the 2C cell content. Because this ratio was constant for a given *Vanilla* species, whatever the cell ploidy level, it was suggested that the nuclear DNA could be categorized into two parts: the P fraction, subject to endoreplication, and the F fraction, not endoreplicated (Brown et al., 2017). These fractions are constant in all cells undergoing partial endoreplication (PE), which suggests the fine regulation of genome rearrangements. The fact that the gametes are haploid also suggests the presence of molecular mechanisms that enable the isolation of the holoploid genome. This type of endoreplication, which appears to be specific to the Orchidaceae lineage in plants, has been successively termed “progressively PE” (Bory et al., 2008; Trávníček et al., 2015; Hřibová et al., 2016), strict PE (Brown et al., 2017), and more recently, PE (Chumová et al., 2021; Trávníček et al., 2019). To be in line with the latest works and to harmonize the terminology for this phenomenon, the term PE will be used in this work. To date, PE has been observed in all species studied within the genus *Vanilla* (Bory et al., 2008;

Brown et al., 2017; Lepers-Andrzejewski et al., 2011; Trávníček et al., 2015).

*Vanilla planifolia* G. Jackson is an emblematic orchid cultivated for its fruit (pod) fragrance. Pods contain many aromatic compounds, particularly vanillin in high proportion (Perez-Silva et al., 2006). In this species, diploid nuclei (2C) are found mainly in nodal tissues (with PE up to 32E), whereas the nuclei of mature leaf cells contain a low 2C fraction and show PE up to 64E (Brown et al., 2017). The F fraction was estimated to be 71.6% of the genome, whereas the P fraction (28.4%) could be duplicated up to 64E. In addition, the proportion of the non-endoreplicated (F) genome varies greatly from species to species. It is very high in *Vanilla pompona* (F = 81%) but rather low in *Vanilla mexicana* (F = 17%) (Brown et al., 2017). Several studies on orchids have also shown that species prone to PE have a larger genome than those prone to conventional endoreplication (Trávníček et al., 2015, 2019; Chumová et al., 2021). Nevertheless, the molecular mechanisms involved in PE are not yet elucidated.

A chromosome-scaled, phased *V. planifolia* genome (Daphna cultivar) was recently reported, highlighting haplotype differences and one ancestral whole-genome duplication shared by all sequenced orchids (Hasing et al., 2020). However, the 1.5 Gb size of the assembled genome was far from the *V. planifolia* genome size, estimated to be about 4 Gb using FCM measurement (Bory et al., 2008; Lepers-Andrzejewski et al., 2011), suggesting that the Daphna genome assembly may be highly incomplete. As mentioned by Hasing et al. (2020), the reason for the genome size discrepancy between FCM and assembly results remains to be elucidated. With about 65% of the *V. planifolia* genome missing in the Daphna assembly, we hypothesize that the missing part of the genome corresponds mainly to the F (non-endoreplicated) fraction (71.6%) (Brown et al., 2017), whose lower representation results in a lower sequencing depth.

Here, we address this issue by developing an approach that combines FCM, cytogenetics, and whole-genome sequencing using the most recently developed technologies (Supplemental Figure 1) with a tissue that is enriched in the 2C fraction (nodes), resulting in a reduced P/F ratio and therefore a greater proportion of the F fraction. We demonstrate that the genome size discrepancy was due to the occurrence of PE, for which

further knowledge at the chromosome scale was gained from this study. We present the most complete version to date of a high-quality, chromosome-level phased genome of *V. planifolia* using a traditional vanilla cultivar from the Indian Ocean region (CR0040). Our results are shared through a web portal that facilitates data access, use, and analyses by a wide community.

## RESULTS

### Genome size, ploidy level, and chromosome content

The 2C genome size of *V. planifolia* CR0040, a traditional vanilla cultivar from La Reunion island (Supplemental Note 1), was estimated in nodal tissues to be  $4.18 \pm 0.08$  pg by FCM (Supplemental Note 1), corresponding to 4.09 Gb (Doležel et al., 2003). To estimate PE levels, the fluorescence ratio of DNA content between consecutive peaks of endoreplication levels was estimated (Supplemental Note 1; Supplemental Figure 2; Supplemental Table 1). Results showed no significant differences (calculated t-values of 1.116, 1.900, 0.935, and 0.365 compared with Student table t-value [ $\alpha = 0.05$ ] of 2.131) between the PE pattern of CR0040 and those of other *V. planifolia* cultivars, such as CR1110 ( $2C = 4.16 \pm 0.04$  pg), studied by Brown et al. (2017). The replicated fraction P was also calculated ( $P = 30.5\% \pm 3.2\%$ ). The equivalent amount  $2p$  was then  $P \times 2C = 1.275$  pg, which meant that the absolute quantity  $p$  was 0.637 pg, and the absolute quantity  $f$  of fixed amount was 1.453 pg (Figure 1A and 1B; Supplemental Note 1). The karyotype of *V. planifolia* obtained by cytogenetics approaches (Supplemental Note 1) appeared to be of bimodal type, composed of 16 both large and small chromosome pairs (Figures 2A–2C), although aneuploid cells were frequently observed, such as those with only 28 chromosomes (Figure 2D and 2E). *V. planifolia* chromosomes possess important portions of telomeric and pericentromeric heterochromatin, which made the determination of their morphology difficult. In the interphase nuclei, this heterochromatin was present in the form of numerous chromocenters that were clearly visible after staining with both orcein (Figure 2F) and DAPI (Figure 2G). This type of heterochromatin is unspecific, whereas heterochromatin linked to rRNA genes is rich in G-C bases. Only one locus (two spots) of rDNA (18S-5.8S-26S) was present in the genome of *V. planifolia* (Figure 2H, arrows), evidenced after chromomycin (CMA3) staining. After Hoechst 33258 staining, our results also revealed that AT-rich DNA regions were more common than GC-rich regions in the *V. planifolia* chromosomes and that some chromosomes were entirely or almost entirely heterochromatinized (Figure 2I).

### Whole-genome assembly and k-mer analysis

CR0040 genome sequencing produced 69 Gb of Pacific Biosciences (PacBio) HiFi long reads, 147 Gb of Oxford Nanopore Technology (ONT) long reads, and 200 Gb of Illumina 10X Genomics short reads (Supplemental Note 1; Supplemental Table 2). These DNA sequencing (DNA-seq) reads were assembled using different bioinformatics pipelines. The best result was obtained using only high-quality HiFi long reads (Supplemental Note 2; Supplemental Tables 3 and 4). Contigs from the HiFi read assembly were scaffolded with optical maps to obtain a final phased assembly of 3.4 Gb (1.5 Gb for haplotype A and 1.9 Gb for haplotype B), representing around 83% of the expected

genome size. One third of the assembly could be anchored onto 14 chromosomes using published *Daphna* chromosomes as references (Hasing et al., 2020). Unfortunately, no data could help to organize the remaining contigs into the two missing chromosomes. Therefore, the remaining two-thirds correspond to unanchored additional sequences that were compiled into two unknown random pseudomolecules, A0 and B0. The final assembly comprised 24 534 contigs with a contig N50 length of 924 kb. The lengths of the 14 chromosomes ranged from 73.5 Mb (Chr01) to 20 Mb (Chr14). Main genome assembly statistics are synthesized in Table 1.

In order to understand how PE affects the assembly, a k-mer analysis was produced. The results should reflect the sequencing coverage of the different genome fractions present in our raw data and assembly. In brief, the reads were split into overlapping k-mers (47-mers in our case). K-mers were then sorted and occurrences counted. These counts were then used to produce a histogram. A spectra-cn plot was used to compare the k-mers found in the reads versus the k-mers found in the assembly (Supplemental Figure 3). The x axis gives the number of times a given k-mer was found in all the reads, reflecting the coverage of the k-mer. The y axis gives a value representing the number of k-mers that were found a specified number of times (x axis value). Interestingly, two k-mer distributions were centered at  $42\times$  and  $84\times$ , representing a classical diploid distribution with heterozygous and homozygous k-mer content. We assumed that these peaks represented the k-mers of the endoreplicated fraction with a high sequencing depth due to higher representation. Remarkably, the graph also showed an additional k-mer distribution centered around  $10\times$  (Supplemental Figure 3, red arrow). This distribution could easily be mistaken for an erroneous k-mer distribution, but we assumed that it represented non-endoreplicated k-mers of the *V. planifolia* genome, with low-sequencing depth due to lower representation.

To validate the assembly and compare it with the already published reference, we produced four k-mer spectra-cn plots showing k-mer distributions of *Daphna* Illumina reads and CR0040 HiFi reads colored both with the *Daphna* and CR0040 assemblies (Figure 3). A spectra-cn plot enables comparison of the k-mers found in the reads versus the k-mers found in the assembly. The k-mer histogram from the reads is colored based on the number of times each k-mer is found in the assembly. For a heterozygous diploid assembly, we expected to find two distributions: on the left, the heterozygous distribution, which should be colored in red because each k-mer is only found once in the assembly, and on the right, the homozygous distribution, which is purple because the corresponding k-mers are found twice in the assembly. The black area at the far left of the diagram corresponds to k-mers that include sequencing errors; these are found a limited number of times in the reads and never in the assembly. *Daphna* Illumina sequencing, being deeper, resulted in better separation between the homozygous ( $80\times$  sequencing depth) and heterozygous ( $160\times$  depth) k-mer fractions in the spectra-cn graph compared with CR0040 (Figure 3A and 3B against 3C and 3D). The same pattern occurred for CR0040 HiFi data around  $45\times$  and  $90\times$  (Figure 3C). The differences between Figure 3A and 3C come from the sequencing depth and the type of tissue used: mature leaves with a higher proportion of

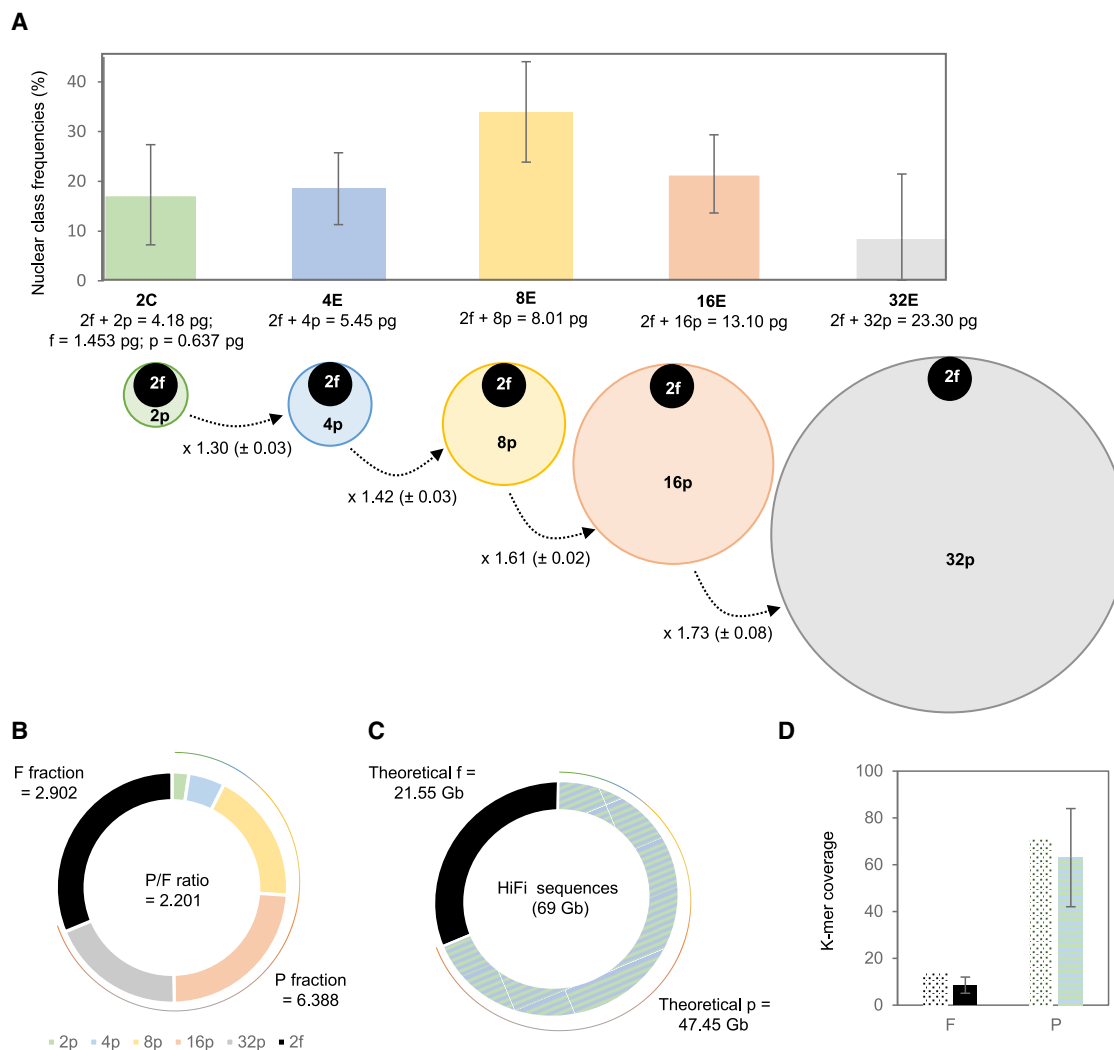

**Figure 1. Endoreplicated and non-endoreplicated fractions in the CR0040 *Vanilla planifolia* genome.**

(A) The histogram represents the distribution of nuclei in *V. planifolia* nodal tissues according to the partial endoreplication state of cells, from 2C (green) to 4E (blue), 8E (yellow), 16E (orange), and 32E (gray). The disks below represent the endoreplicated (colored) and non-endoreplicated (black) DNA content for each class of nuclei, proportionally to their mass (pg). The lowercase f and p denote the respective DNA quantities of the F fraction (fixed proportion of the haploid genome that cannot endoreplicate) and the P fraction (part that participates in endoreplication). The mean and the standard deviation (SD) of the interpeak ratio have been indicated below the dotted arrows.

(B) F and P fractions and P/F ratio values obtained by flow cytometry and detailed for the P fraction for each nuclear class (2C, green; 4E, blue; 8E, yellow; 16E, orange; and 32E, gray).

(C) Theoretical F and P fractions expected from HiFi sequencing and from flow-cytometry data.

(D) Theoretical (dotted) and experimental k-mer coverages for F (black) and P (hatched) fractions.

the P fraction for *Daphna* and nodal tissues with a lower P/F ratio for CR0040. The k-mer distribution of the non-endoreplicated fraction (low coverage) was not found in the *Daphna* assembly (black area left of Figure 3B and 3D) but is mostly present in the CR0040 assembly. Regarding the completeness of the *Daphna* reference assembly, the spectra-cn plots (Figure 3B and 3D) showed that part of the heterozygous fraction was missing (orange arrows), and some k-mers were in overrepresented copies ( $>2\times$ ) in both heterozygous and homozygous fractions (Figure 3B, black arrows). The spectra-cn diagram also showed heterozygous content present two or more times instead of once in this assembly (Figure 3, black arrows), which could indicate spurious duplications. As a whole, our CR0040

genome assembly is close in size to the FCM estimate and has the expected k-mer diploid profile, with a well-represented non-endoreplicated fraction (Figure 1C and 1D).

### Gene and transposable element annotation

The assembled genome supplemented with transcriptomic data from nine distinct tissues made it possible to identify 59 128 protein-coding genes (26 392 for haplotype A and 32 736 for haplotype B), 90.31% of which could be associated with a function (Supplemental Note 3; Supplemental Tables 5–10). Sixty-seven percent of the predicted genes were anchored onto the 14 chromosome pairs and the remaining 33% onto the two random mosaic

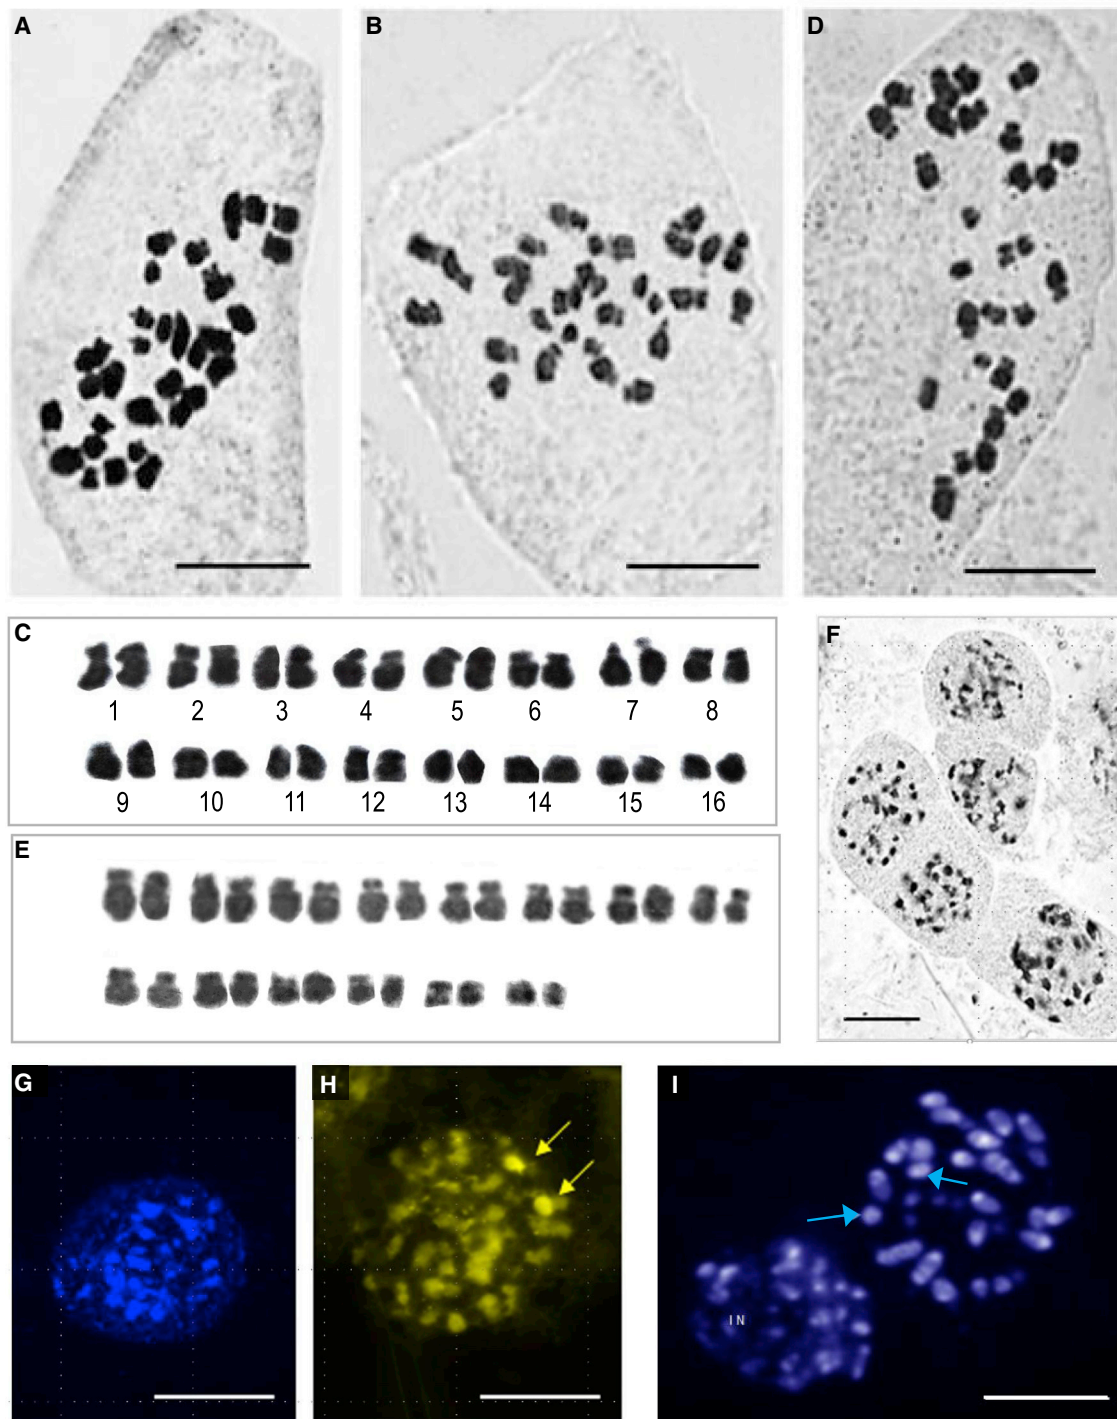

**Figure 2. Cytogenetic analysis of *Vanilla planifolia* CR0040.**

(A–D) Orcein staining: (A and B) mitotic metaphases with  $2n = 32$  chromosomes; (C) karyotype corresponding to (B); (D) hypoaneuploid mitotic metaphase with  $2n = 28$  chromosomes; (E) karyotype corresponding to (D); (F) interphase nuclei showing heterochromatic chromocenters; (G) DAPI-stained interphase nucleus showing unspecific heterochromatin; (H) chromomycin fluorochrome staining with two  $CMA^+$  regions (arrows) corresponding to rDNA sites; (I) Hoechst-stained AT-rich DNA in metaphase and interphase nucleus (IN), with two fully heterochromatinized chromosomes (arrows). Scale bars represent  $10 \mu\text{m}$ .

chromosomes that were constructed from the unanchored scaffolds and contigs (Figure 4A, blue distributions). We estimated the annotation completeness at 93.2% with the Benchmarking Universal Single-Copy Orthologs approach using the Viridiplantae

database. In total, 72% of the assembly consisted of repeats, including single-sequence repeats (15.4%), and 9.7% of other low-complexity regions (Supplemental Note 3; Supplemental Table 11). A high content of retrotransposons was found (41.5%),

|                                                               |        |
|---------------------------------------------------------------|--------|
| Total assembly size (Gb)                                      | 3.4    |
| Total contig number                                           | 24 534 |
| Contig N50 length (Mb)                                        | 0.924  |
| Maximum contig length (Mb)                                    | 31     |
| GC content (%)                                                | 31.6   |
| Number of protein-coding genes                                | 59 128 |
| Benchmarking Universal Single-Copy Orthologs completeness (%) | 93.2   |
| Total of interspersed repeats (%)                             | 47.0   |

**Table 1. HiFi assembly and annotation statistics of the diploid CR0040 genome**

whereas the content of DNA transposons was low (1.4%). The long terminal repeat retrotransposon content was richer in Gypsy (9.7%; Figure 4A, purple distributions) than in Copia (6.1%; Figure 4A, orange distribution), although a number of annotated retrotransposons (12.5%) were not more precisely classified. The two random mosaic chromosomes were enriched in repeats and showed low gene density and low sequencing depth (Figure 4A, green distributions, and Supplemental Table 12). Indeed, compared with the 14 chromosome sequences, the unanchored regions showed higher proportions of long interspersed nuclear element sequences (8% and 14.05%), and this was true for both haplotypes. By contrast, DNA transposons (3.14% and 0.93%), short interspersed nuclear elements (0.12% and 0.05%), and long terminal repeats (21.67% and 15.57%) represented a larger part of the 14 chromosome sequences than of the unanchored regions. The biggest difference in unanchored regions was observed for unclassified retrotransposons, which represented 16.76% of the unanchored sequences versus 3.28% of the 14 chromosome sequences. Main genome annotation statistics are synthesized in Table 1.

### *V. planifolia* pangenomics and whole-genome duplication

The comparison of the four mosaic haplotypes from the two *V. planifolia* cultivars, CR0040 and Daphna (Supplemental Tables 12 and 13), showed that the 14 pseudomolecules of CR0040 were shorter and contained fewer genes than those of Daphna and that a large number of regions in the CR0040 pseudomolecules (haplotype A or B) were not located in the Daphna pseudomolecules (Supplemental Figure 4). Pangenomic analysis of the orthogroups from proteomes derived from the 14 chromosomes only (Supplemental Figure 5; Supplemental Table 14; Supplemental Note 4) indicated that the core genome was composed of 14 210 families and 77 692 genes (35 972 CR0040 and 41 720 Daphna). The dispensable genome of CR0040 contains 1266 families and 3613 genes specific to CR0040. The dispensable genome of Daphna contains 3997 Daphna-specific families and 13 645 genes. Finally, we looked at the expansion or reduction of gene families in relation to six proteomes (CR0040, Daphna, *Phalaenopsis equestris*, *Phalaenopsis aphrodite*, *A. thaliana*, and *Oryza sativa*; Supplemental Figure 6). From an orchid perspective, the expansion number for the orchid node is rather low (+36), whereas the Daphna-specific number is rather high (A +1841 and B +1943) compared with CR0040 (A +418 and B +826).

To identify whole-genome duplications (WGDs), pairwise genome synteny analyses between CR0040, Daphna, and *P. aphrodite* and within themselves were carried out (Supplemental Figures 7 and 8; Supplemental Notes 4 and 6). The CR0040 haplotype A dot plot validated at least one pan-orchid WGD ( $\alpha^{\circ}$ , the origin of the paleo-allotetraploid) previously found by Hasing et al. (2020). An additional dot plot diagonal and dS peak suggested a second WGD, possibly the tau of Monocots ( $\tau^m$ ).

### Detection of non-endoreplicated regions

PE induces highly unbalanced DNA representation with a P/F DNA ratio ranging from 3 to 10, depending on the tissue. This was reflected in our assembly by highly variable sequencing depth (Figure 4A, green lane). The two random mosaic chromosomes that showed a low sequencing depth at most loci may therefore contain a large part of the non-endoreplicated F fraction of the genome. It is likely that a large number of unanchored sequences originate from the two fully heterochromatinized chromosomes observed in the interphase nuclei (Figure 2I), possibly chromosome pairs 15 or 16. The remaining unanchored sequences should correspond to missing fractions in the anchored chromosomes. Interestingly, the sequencing reads that mapped to the CR0040 and Daphna assemblies also showed intra-chromosomal sequencing depth variations (Figure 4B). These patterns were consistent, regardless of the technology used. To observe this phenomenon globally on all chromosomes and genomes with all technologies (HiFi, ONT, and Illumina), sequencing depth analysis tools were used and manual validation performed (Supplemental Note 5; Supplemental Tables 15 and 16). Two patterns of sequencing depth variation were identified along all chromosomes. The first one (indicated with a dotted box labeled “1” in Figure 4B and Supplemental Figure 9) corresponded to a sharp decrease in sequencing depth for both cultivars, with all sequencing technologies, which dropped down from 45x–120x to less than 20x. Surprisingly, this pattern occurred independently on the two haplotypes. A total of 37 very low-coverage regions with this pattern (from 0.4 to 6 Mb in length) were identified along the chromosomes (24 in haplotype A and 13 in haplotype B) for a cumulative size of 60.1 Mb. In a large portion of these regions, we found low gene density and high repeat density. This pattern could correspond to non-endoreplicated regions present in both the Daphna and CR0040 genomes. The fact that these patterns are systematically located at junctions between super-scaffolds is consistent with the decrease in sequencing depth caused by non-endoreplication, which impaired the assembly of the endoreplicated regions located on either side. The second pattern (indicated with a dotted box labeled “2” in Figure 4B and Supplemental Figure 9) corresponded to 36 regions (from 1.2 Mb to 20 Mb in length; cumulative size of 207.2 Mb) with segmental sequencing depth variation present in CR0040 (with HiFi, ONT, and Illumina) but not in Daphna (with ONT and Illumina). Furthermore, these variations were syntenic along the two haplotypes, but the direction of variation was inverted between the two phases. Their respective levels of sequencing depth differ by a factor of about three in CR0040. The cause of these apparently coordinated sequencing depth inversions between CR0040 haplotypes remains unclear. After analyzing the locations of these k-mers in the CR0040 assembly, it appeared that these low depth k-mers (between 5x and 15x) were mostly present in the unanchored part of the genome

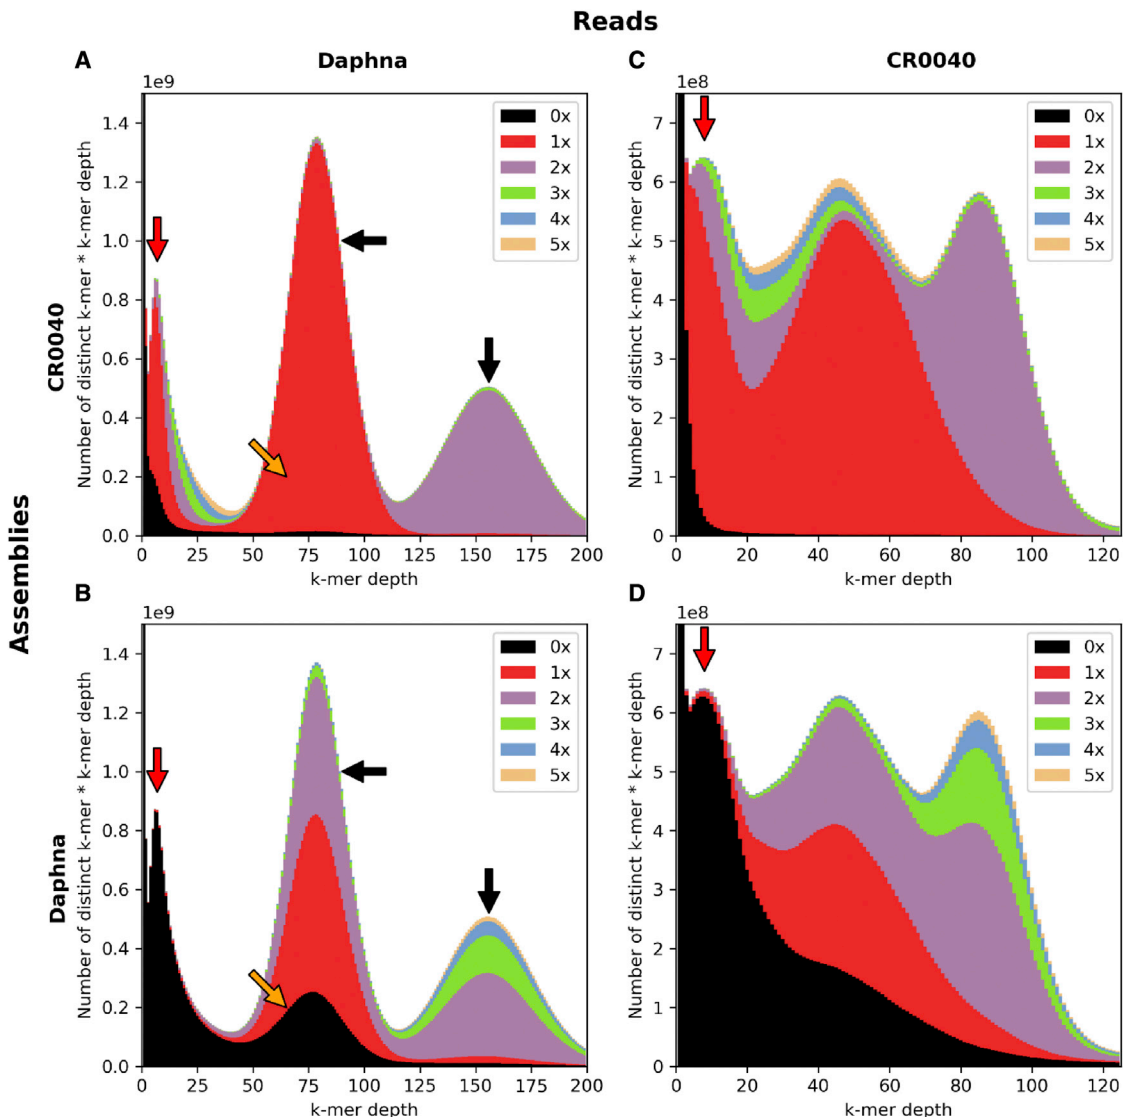

**Figure 3. Assembly k-mer content comparison between CR0040 PacBio HiFi long reads and Daphna Illumina short reads using spectra-cn graph.**

(A–D) The x axis represents k-mer multiplicity (counts), and the y axis indicates the number of distinct k-mers multiplied by their counts. Because of different sequencing depths between read sets, the y axis upper values are  $10^9$  for (A) and (B) and  $10^8$  for (C) and (D). The area colors indicate the number of k-mer copies found in the assembly (black: 0x or missing k-mers, red: 1x, purple: 2x, green: 3x, blue: 4x, and orange: 5x). Four spectra-cn plots are presented: (A) Daphna reads versus CR0040 assembly, (B) Daphna reads versus Daphna assembly, (C) CR0040 reads versus CR0040 assembly, and (D) CR0040 reads versus Daphna assembly. The red arrows point toward a low-coverage k-mer distribution not expected in a diploid genome assembly spectra-cn graph. The black arrows point toward the heterozygous (on the left) and homozygous (on the right) k-mer distributions expected in a diploid genome assembly. The orange arrows point toward missing k-mers in the heterozygous k-mer distribution. The lower the black distribution at this location, the fewer k-mers are missing in the assembly.

compared to the chromosome sequences (Figure 5), with median ratio values equal to 0.27 and 0.036, respectively, showing a significant difference (Wilcoxon-Mann-Whitney test;  $p = 4e-13$ ). However, chromosomes 7A and 6B were outliers, showing also a high proportion of low-depth k-mers. In addition, the distribution of these k-mers along the genome was globally consistent with the areas identified, except for some discrepancies (Supplemental Figure 10). Chromosomes 6B and 7A showed strong signals in terms of low-depth k-mer proportions, as already pointed out in Figure 5. Indeed, on chromosome 6B, k-mers of this type were positioned on nearly all the assembled sequence, whereas they

were localized on approximately half of the assembled chromosome 7A sequence.

### Orthologs of cell cycle regulator genes involved in *A. thaliana* endoreplication

A search for orthologs of the CDK and cyclin (Cyc) families of *A. thaliana*, involved in the regular endoreplication mechanism, showed that representatives of these two families were indeed found in the proteomes of CR0040 and *P. aphrodite* (Supplemental Table 17). However, the number of genes

A

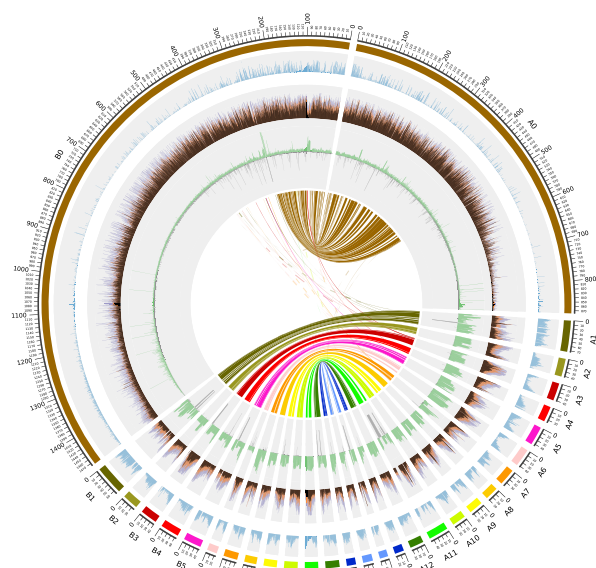

B

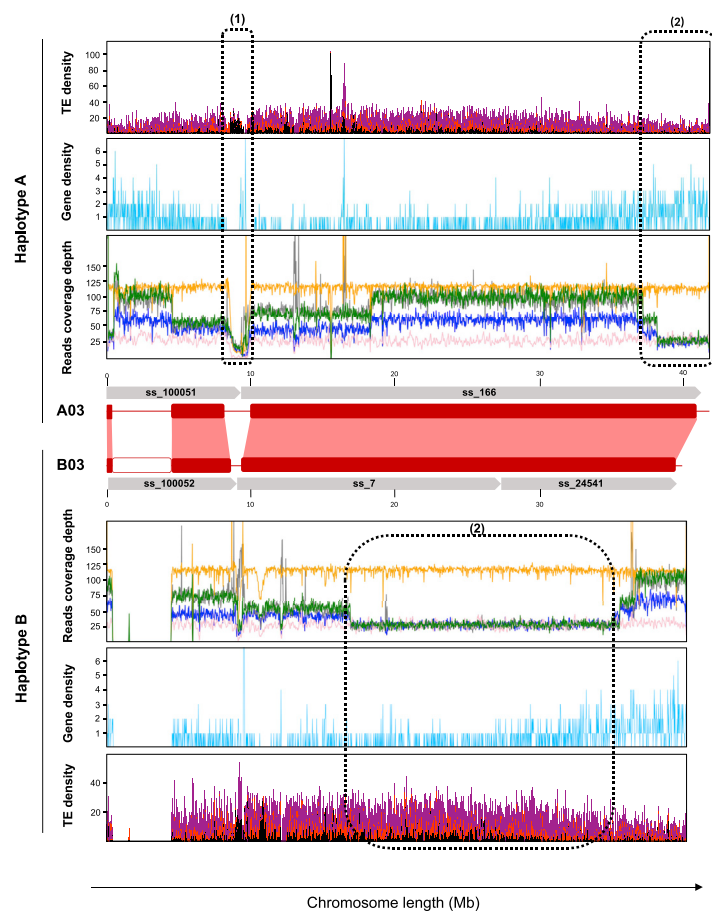

**Figure 4. Overview of the assembled vanilla genome.**

(A) Circos plot of the genomic content along *V. planifolia* haplotypes A and B and the relationship between them. All tracks are divided into 500 kb genomic windows. From the outside to the inside of the circular representation, ideograms of 28 chromosomes and two random mosaic chromosomes that contain the unanchored scaffolds are shown. Gene density (blue) and interspersed repeat RepeatMasker hit density (black: retroelements; orange: long terminal repeat/Copia; purple: long terminal repeat/Gypsy) are shown. Sequencing depth was obtained by mapping CR0040 PacBio HiFi reads on the assembly (green) and N density (gray). Syntenic blocks across haplotypes are connected by lines in the innermost part of the figure.

(B) Sequencing depth along the CR0040 A03 and B03 chromosomes (red rectangles) obtained by mapping *Daphna* Illumina (yellow) and ONT (pink) reads and CR0040 PacBio HiFi (blue), Nanopore (green), and Illumina (gray) reads onto the CR0040 assembly. Synteny between homologous chromosomes is represented by red boxes. Gaps (N stretches) that explain sudden drops in sequencing depth are shown with white blocks. (1) Low level of sequencing depth for all data is shown. (2) Inverted level of sequencing depth for CR0040 between haplotypes A and B and constant level of sequencing depth for both *Daphna* haplotypes are shown. Gene and retrotransposon distributions along the chromosomes are represented by a blue line chart and a stacked histogram (Copia: red; Gypsy: purple; other retrotransposons: black), respectively.

genes encoding regulatory proteins of the CDK–Cyc complexes, all of them had orthologs in both orchids. However, it appeared that these multigenic families were slightly under-represented in the CR0040 gene annotation compared with those of *A. thaliana* and *P. aphrodite*. Finally, an imbalance between the A and B haplotypes was observed for Fizzy-related proteins and CDK inhibitor (Krp) orthologs.

### Vanilla Genome Hub

The Vanilla Genome Hub (VGH) (<https://vanilla-genome-hub.cirad.fr>) has been developed to support post-genomics efforts. It centralizes vanilla genomic information with a set of user-friendly interconnected modules and interfaces for the analysis and visualization of genomic data. From the main menu of the VGH (Supplemental Note 6; Figure 6A), the search for genes of interest to biologists is simplified using the interoperable system by the identification of paralogous genes using keywords and sequence homology (Figure 6B and 6C) and the production of an information report with gene name, gene localization, and polypeptide function (Figure 6D). The genome browser was built to offer tracks of supplemental information, such as GC content, gene structure, gene expression, DNA-seq depth, and repeat composition to support the identification of new genes of interest (Figure 6E and Supplemental Figure 11). A metabolic pathway reconstruction and visualization tool enables the identification of annotated genes involved in pathways (Figure 6F). A Gene Ontology enrichment tool enables testing and visualization of enrichment according to a Gene Ontology category of a gene group (Figure 6G). Finally, comparative analysis at the genome scale is supported by an interactive multiscale synteny visualization (Figure 6H).

encoding CDKs and Cycs found via the orthogroups approach was lower for these two species. For example, the gene encoding CycD3-1 in *A. thaliana* (At4g34160) was part of a species-specific orthogroup that contained some other D-type Cyc genes. Regarding



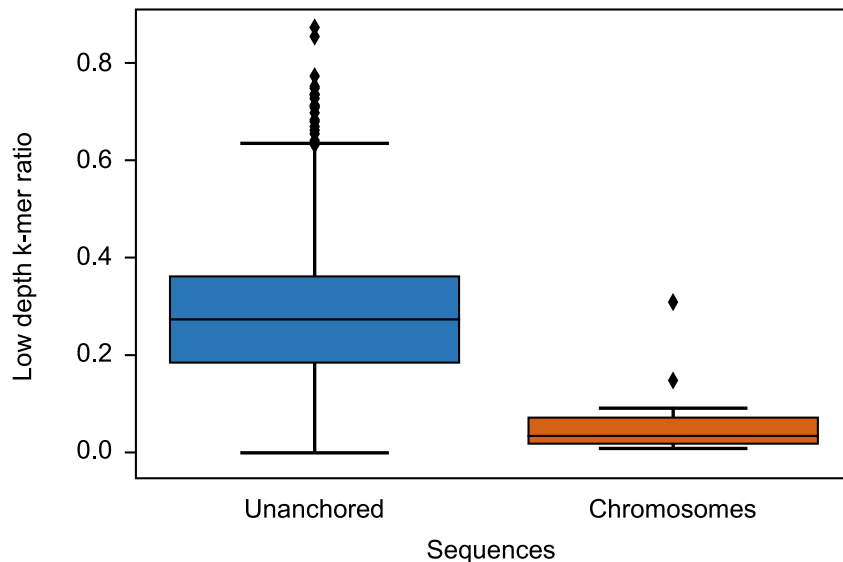

**Figure 5. Ratio of k-mers within unanchored and anchored CR0040 genome.**

This boxplot shows the ratio of k-mers with a depth less than 15 in our HiFi reads within unanchored sequences (blue) and within chromosomes (orange).

genome published previously (Hasing et al., 2020). This difference could be explained by the fact that the CR0040 genome was assembled from HiFi reads that enabled the assembly of repetitive regions in different contigs despite their low sequencing depth. We were thus able to assemble a greater number of repeated sequences that may correspond to a large fraction of the non-endoreplicated genome and were missing from the Daphna genome assembly. The biological reality of this hypothesis is reinforced by the consistency of the k-mer depth profiles

and sequencing depth patterns that resulted from the mapping of reads from different sequencing technologies (HiFi, 10X, and ONT) tested in this study for CR0040 (Supplemental Figure 9). A k-mer spectra-cn diagram is an efficient tool for visually comparing the k-mer compositions of reads and assemblies. Such diagrams are used to validate diploid or haploid assembly quality (Yen et al., 2020). The k-mer spectra-cn diagram clearly shows a general diploid pattern, with a heterozygous distribution containing only k-mers present once in the assembly and a homozygous distribution containing, as expected, only k-mers present twice in the assembly. Unexpectedly for a diploid genome, this figure includes a third distribution that is located in the low-coverage area of the diagram. The color pattern shows clearly that these k-mers present in low frequencies (5–15 times) are also present in our assembly. These k-mers represent the non-repeated fraction of low-coverage sections of the assembly, which are mainly located in the unanchored sequences but are also present in low-coverage sections of other chromosomes. Even if the unanchored sequences are mainly built of repeats, they also harbor genes and other non-repeated blocks, and these portions are large enough in terms of k-mers to generate this unexpected k-mer distribution in the spectra-cn plot. These k-mers are not present in the public *V. planifolia* Daphna assembly, and therefore, the corresponding distribution is black in Figure 3B.

## DISCUSSION

### Flow cytometry and cytogenetic data validate genome size and chromosome content

Genome size, ploidy level, and chromosome content of the *V. planifolia* CR0040 cultivar were validated by FCM and cytogenetic analyses. The estimated size of 4.09 Gb indicated a ploidy level similar to those of other traditional diploid *V. planifolia* cultivars (Bory et al., 2008; Lepers-Andrzejewski et al., 2011). Estimation of endoreplication levels confirmed PE, as previously described in *V. planifolia* (Brown et al., 2017). This species was shown to exhibit diploidized meiotic chromosome pairing with 16 bivalents (Bory, 2007). This result demonstrates the complete diploidization of this supposed segmental paleo-allotetraploid (Ravindran, 1979; Nair and Ravindran, 1994). The same meiotic observation was also performed for *Vanilla × tahitensis* by Lepers-Andrzejewski et al. (2011). Aneuploid chromosome numbers were frequently observed in mitotic metaphases of *V. planifolia* (Nair and Ravindran, 1994; Bory et al., 2008), possibly owing to the observed mitotic associations that could lead to unequal anaphase separation. This may lead to errors in the evaluation of basic chromosome number, as was the case in a recent paper in which the authors considered that the basic number was  $x = 14$  (Hasing et al., 2020). The phenomenon of aneuploidy apparently occurs only in somatic cells, whereas meiosis appears to be regular, with a stable number of chromosomes (Bory, 2007). Although the CR0040 assembly is more complete than that of Daphna, only 14 pseudomolecules were obtained because CR0040 scaffolds were anchored on the 14 Daphna pseudomolecules. Chromosomes 15 and 16 are probably non-endoreplicated and present in the unanchored part (CR0040\_A0 and CR0040\_B0).

### PE hinders whole-genome assembly

Given the CR0040 diploid genome size estimate of 4.09 Gb by FCM, our genome assembly represented around 83% of the expected genome size and was twice the size of the Daphna

### Molecular signatures of partial endoreplication

The abundance of interspersed repeats detected in CR0040 was consistent with already mentioned data in other orchids, such as *P. equestris* (Cai et al., 2015) and *P. aphrodite* (Chao et al., 2018), and in other lineages, like the *Oryza* genus (Stein et al., 2018). The high content of retrotransposons and low content of DNA transposons were in the range of what has been found for different orchids (Cai et al., 2015; Chao et al., 2018). High repeat content was found in candidate non-endoreplicated regions, which is in agreement with previous descriptions in other orchids (Chumová et al., 2021). Furthermore, some types of repeats may be preferentially found in non-endoreplicated regions, as shown by differences in repeat proportions, particularly

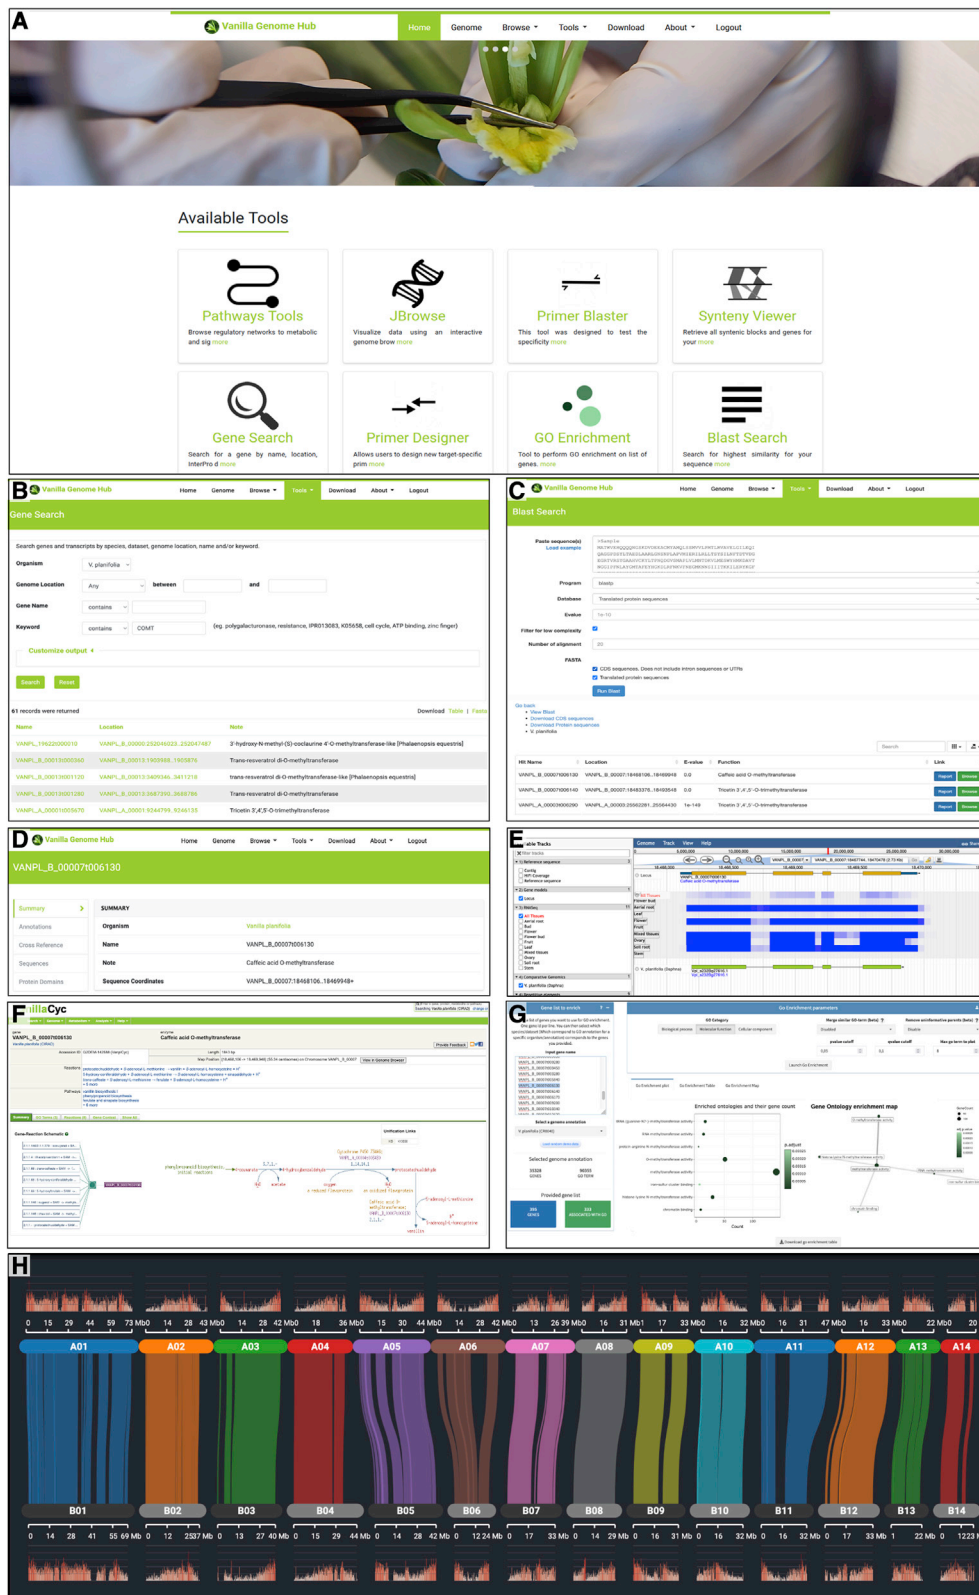

Figure 6. Overview (screen shots) of some interoperable vanilla genome analysis tools integrated into the Vanilla Genome Hub.

- (A) Main menu.
- (B) Gene search (Tripal MegaSearch).
- (C) Sequence homology search (Blast).

(legend continued on next page)

retrotransposon proportions, between assembled chromosomes and unanchored sequences. Thus, long interspersed nuclear elements, for example, occupy a larger portion of the unanchored regions than of the 14 chromosomes, even though these regions are overrepresented in the present assembly. However, the lack of a more detailed annotation of the retrotransposon class hampers the search for a potential preferential distribution of repeat families between endoreplicated and non-endoreplicated regions. It is therefore crucial to better annotate these repeats in order to determine exactly which kinds are found preferentially in the two fractions of the genome. On the other hand, the distribution of genes in the genome shows the opposite trend, with approximately two-thirds of the protein-coding sequences localized in the anchored region.

The distinct sequencing depth profiles observed between CR0040 and Daphna probably reflected a tissue-specific endoreplication pattern. Indeed, the nodes used to sequence the CR0040 genome are growing and differentiating tissues, whereas the leaves used to sequence the Daphna genome are composed of fully differentiated cells. The irregular haplotype-specific endoreplication pattern (segmental or not) observed in CR0040 could thus result from a peculiar physiological activity. Whatever the reason, this intriguing pattern suggests a complex and fine regulation of PE at the chromosome level, which deserves further study. Although no previous study has demonstrated the mechanisms underlying PE in orchids, many works have focused on the regulation of regular endoreplication found in a large number of plant species and well analyzed in tomato and *Arabidopsis* (Lang and Schnittger, 2020). The common mechanism that triggers endoreplication is a downregulation of mitotic CDK activity to suppress mitosis and a fine regulation of this activity throughout the induced endocycle, with an alternation between high and low activity levels at specific checkpoints in order to maintain the replication process (De Veylder et al., 2011; Shimotohno et al., 2021). CDK controls cell-cycle progression and mitosis entry via its phosphorylation activity, which is activated by association with CYC proteins. Recently, Inada et al. (2021) demonstrated the involvement of actin and actin-binding protein in the regulation of *A. thaliana* endoreplication. The present whole-genome analysis made it possible to identify orthologous CDK, Cycs, CDK-activators and repressors, and actin depolymerizing factors in *V. planifolia* CR0040. A first step in understanding orchid PE would therefore be to further analyze these molecular regulators. Indeed, the recognition of orthologs and paralogs in large gene families, such as the CDK–Cyc complex, is challenging and requires deeper investigation by high-quality manual annotation of the genes of interest (Vaattovaara et al., 2019).

Although PE seems specific to orchids in plants (Trávníček et al., 2015), this phenomenon of under-represented genomic regions is well known in metazoans. Ciliates, such as *Paramecium tetraurelia* and *Tetrahymena thermophile*, show programmed DNA elimination following endoreplication in their macronucleus (MAC), involving chromosome fragmentation and elimination of

specific sequences called internal eliminated sequences (IESs) (Bracht et al., 2013; Sellis et al., 2021). However, FCM approaches in *Ludisia discolor*, an orchid subject to PE, have ruled out the possibility of such DNA elimination and favor the hypothesis of under-replication (Hřibová et al., 2016). Under-replication has also been studied in several organisms, such as *Drosophila*, in which it has been proposed that a reduction in the expression of genes involved in DNA replication may lead to a slower mitosis S phase and an incomplete replication of genomic regions during late S phase (Lilly and Spradling, 1996). Molecular mechanisms described in *Drosophila* highlighted an inhibition of replication fork progression involving Rif1 protein, which interacts with the SUUR protein (Munden et al., 2018; Armstrong et al., 2019).

Finally, cytogenetic studies using *in situ* hybridization techniques (fluorescence *in situ* hybridization [FISH] and genomic *in situ* hybridization) could also be used to increase our knowledge of the molecular signatures of PE (Younis et al., 2015). A recent advance in FISH is the development of probes based on synthetic oligonucleotides specific to repetitive sequences or to particular chromosome regions (Jiang, 2019). This new generation of FISH probes in plants has been applied to species with sequenced genomes, such as *Zea* and *Cucumis* species (Han et al., 2015; Martins et al., 2019; Braz et al., 2020; Zhang et al., 2021a). Endoreplicated versus non-endoreplicated genomic regions could be used to synthesize oligo-based FISH probes specific to each fraction in order to precisely locate these PE signatures on chromosomes. The genomic *in situ* hybridization technique uses the total genomic DNA of a species, in contrast to FISH. We hypothesize that hybridizing the total DNA of highly endoreplicated nuclei (16E and 32E) to CR0040 chromosomes would induce a more intense hybridization signal in endoreplicated regions, thus enabling us to identify non-endoreplicated areas that showed little hybridization.

### Impact of technologies on whole-genome evolution analysis

The strategy of combining optical mapping with HiFi long-read sequencing for the CR0040 genome assembly resulted in a haplotype A with 14 pseudomolecules of better quality and with fewer scaffolding errors than the Daphna haplotype A, which was built with Hi-C and ONT technologies (Hasing et al., 2020). Indeed, comparisons between the Daphna and CR0040 A haplotypes revealed a dual-haplotype conservation problem in the Daphna phased assembly, which is reflected in the Daphna Hi-C scaffolding. The use of HiFi long reads and optical maps enabled more accurate haplotype separation, as shown in previous works (Matthews et al., 2018; Du et al., 2020). In the case of CR0040, not only did HiFi enable better assembly of non-endoreplicated regions but also Hifiasm allowed better separation of haplotypes. These improvements were therefore necessary to better solve the sequencing of the complex vanilla genome, with a high rate of heterozygosity (Ho *V. planifolia*

(D) Gene report (Tripal).

(E) Genome Browser (JBrowse).

(F) Metabolic pathway visualization (Pathway Tools).

(G) Gene Ontology enrichment (DIANE).

(H) Comparison of genomic sequences (SynVisio).

cultivars = 0.362; Favre et al., 2022) and subjected to PE (Brown et al., 2017). However, this dual-haplotype conservation problem observed in *Daphna*, and not in CR0040, impacted comparative pan-genomics analyses and distorted the results obtained. Thus, the differences observed between the two *V. planifolia* genomes (number of paralogs, numbers of gene families with expansions and contractions, and complete and duplicated Benchmarking Universal Single-Copy Orthologs scores) could be explained by these mosaic assembly problems and therefore by an incorrect separation between haplotypes A and B.

Monocot genome evolution analyses were carried out using the high-quality haplotype A sequence of CR0040. Dot plot results were in agreement with the fact that *V. planifolia* is a diploidized paleo-polyploid species with a primary basic chromosome number  $x = 8$  and a secondary basic number  $x = 16$ , as described for the whole *Vanilla* genus (Felix and Guerra, 2005). Moreover, only one locus (two spots) of rDNA (18S-5.8S-26S) was identified in the genome of *V. planifolia* by cytogenetic approaches, which provides additional evidence of an ancient diploidization of this supposed segmental paleo-allotetraploid. Finally, two WGDs, possibly corresponding to  $\alpha^\circ$  and  $\tau^m$ , were highlighted, as also described for the *Dendrobium chrysotoxum* chromosome-scale genome assembly (Zhang et al., 2021b).

### Efficiency of an integrative approach combining cytogenetics with high-quality whole-genome sequencing

In this study, we confirmed the size and structure of the *V. planifolia* genome using both cytogenetics and nuclear DNA-seq methods. The particular phenomenon of PE at play in many orchids has been explored at the chromosome level for the first time in plants, to our knowledge. Our data showed that the non-endoreplicated sequences are very predominantly made up of repeated sequences. This confirmed, at the genomic level, previous findings in orchids by Chumová et al. (2021) based on a phylogenetics generalized least squares model and by Brown et al. (2017), who used nuclei imaging to demonstrate that in *Vanilla*, on the other hand, the endoreplicated part was transcribed. We nevertheless revealed that 33% of the 59 128 annotated protein-coding genes were present in the two random mosaic chromosomes, corresponding mainly to the non-endoreplicated part, as shown by low sequencing depth. In addition, a thorough examination of sequencing depths along anchored chromosomes with three different technologies revealed 73 regions whose different endoreplication levels vary with haploid phase, half of which may be linked to tissue type (leaves versus nodes). This last conclusion remains to be confirmed with DNA-seq from different tissues of the same cultivar. This work constitutes considerable progress in our understanding of *V. planifolia* genomics and sheds light on the most relevant methodologies for further deciphering this complex genome and the PE phenomenon. The VGH was built to help the community to address major unresolved questions about vanilla, such as PE, biosynthesis of aromatic compounds, and resistance to pathogens. We are working on a new version of the vanilla nuclear genome sequence that will be improved in terms of haplotype separation, chromosome reconstruction, and gene and repeat element annotation in order to further investigate the mo-

lecular mechanisms of PE with appropriate plant material, biotechnologies, and bioinformatics tools.

## METHODS

### Cytometry, cytogenetics, and DNA sequencing

A traditional vanilla cultivar (CR0040) from Reunion Island was used in this study (Supplemental Note 1). FCM and cytogenetics studies were performed using protocols described in Supplemental Note 1. High-molecular-weight DNA and ultra-high-molecular-weight DNA were extracted from node tissues and sequenced using PacBio HiFi, ONT, and Illumina technologies (Supplemental Note 1). Optical genome maps were produced using the Bionano Genomics protocol and the Saphyr G1 System (Supplemental Note 1).

### Genome assembly and analysis

HiFi reads were assembled into contigs using Hifiasm 0.13 with default parameters (Cheng et al., 2021). The hybrid scaffolding between DNA contigs and optical genome maps was performed using the hybrid Scaffold pipeline of Bionano Genomics with default parameters. These scaffolds were phased into two haplotypes using in-house scripts, and the unscaffolded contigs were phased using purge dups ([https://github.com/dfguan/purge\\_dups](https://github.com/dfguan/purge_dups)). Then, pseudomolecules were reconstructed using alignments of the phased assembly on *Daphna* chromosomes (Hasing et al., 2020; Supplemental Note 2). The assembly quality was estimated with QAST 5.1.0 (Gurevich et al., 2013) and using the approach of Benchmarking Universal Single-Copy Orthologs (version 5.0.0) (Simao et al., 2015; Supplemental Note 2). The k-mer analysis was performed with kat 2.4.2 using the comp tool (Mapleson et al., 2017). The plot script was slightly modified to project on the y axis the number of distinct k-mers multiplied by the k-mer multiplicity instead of just the number of distinct k-mers. In parallel, k-mers of size 47 with a depth between 5 and 15 were extracted within PacBio sequences using Jellyfish 2.3.0 (Marcais and Kingsford, 2011). These k-mers were repositioned on our reference using the tool “query\_per\_sequence” ([https://github.com/gmarcais/Jellyfish/tree/master/examples/query\\_per\\_sequence](https://github.com/gmarcais/Jellyfish/tree/master/examples/query_per_sequence)), and the ratio of these k-mers was computed among each sequence of our genome. These sequences were split between chromosomes and unanchored sequences, and the repartition of the k-mer ratio was drawn using the python seaborn library (<https://seaborn.pydata.org/>).

### Structural and functional genome annotation

Automatic gene prediction was performed on CR0040 contigs with the Eukaryotic Gene Prediction Pipeline (EGNEP version 1.5) (Sallet et al., 2019; Supplemental Note 3). Transcriptomic data from CR0040 were produced using RNA sequencing of nine organs with Illumina technology (Supplemental Note 3). In addition, gene expression profiles and putative novel isoforms were identified with StringTie v.2.0.3 (Kim et al., 2019; Supplemental Note 3). Transcriptomic data from *V. planifolia* cultivars (CR0040, *Daphna* [NCBI BioProjects: PRJNA668740 and PRJNA633886], and an unspecified cultivar [NCBI GEO: GSE134155]); proteomic data from *V. planifolia* *Daphna* (Hasing et al., 2020), *P. equestris* (NCBI BioProject: PRJNA382149), and the *Lilopsida* class (Swissprot: 2020\_06); and a custom orchid-specific statistical model for splice-site detection were used for this analysis (Supplemental Note 3). Functions were assigned through InterProScan domain searches as well as similarity searches against the UniProt/Swissprot and UniProt/TrEMBL databases (BlastP). Gene Ontology terms were assigned through InterProScan (Jones et al., 2014) results, and enzyme classification numbers were predicted by combining the tools PRIAM (Claudel-Renard et al., 2003) and BlastKOALA (Kanehisa et al., 2016).

Repeats were first identified using RepeatModeler v.2.0.1 (Flynn et al., 2020), RepeatScout v.1.0.5, and transposable element genes predicted from EGNEP annotation and then classified with REPET v.3.0 (Flutre

et al., 2011) and PASTEC v.2.0 (Hoede et al., 2014) according to Wicker's transposable element classification (Wicker et al., 2007). After cleaning steps (see details in Supplemental Note 3), repeats were clustered using CD-HIT v.4.8.1 (Fu et al., 2012) to produce two banks of repeats. The CR0040 genome was then annotated for repeats using previous banks, RepeatMasker v.4.1.1 (Tarailo-Graovac and Chen, 2009), and bedtools intersect v.2.29.2 (Quinlan and Hall, 2010).

### Genomic comparisons and reconstruction of gene families

To compare the 14 haplotype A chromosomes of both vanilla cultivars, check the completeness of the *Vanilla* genome, and study the pan-orchid  $\alpha$ ° WGD, a series of analyses were performed with the CoGe Syn-Map pipeline as described in Supplemental Note 4. Gene family reconstruction was performed using OrthoFinder2 (v.2.4.0) (Emms and Kelly, 2019). Genes known to be involved in cell cycle control in *A. thaliana*, such as Cycs, CDKs, and known regulators of these genes, were searched in the CR0040 and *P. aphrodite* proteomes with a combination of BlastP searches and orthogroups. This analysis was applied to CDK-A and B types as well as Cyc-A, B, and D types. Regulators of these genes included CDK inhibitor (KRP), transcriptional repressor ILP1, WEE1, actin depolymerizing factor, and Fizzy-related proteins.

### Detection of non-endoreplicated genomic regions

Reads from each sequencing technology used in this study (HiFi, ONT, and Illumina reads from CR0040), as well as ONT and Illumina reads from Daphna, were mapped onto the CR0040 assembly. Illumina short reads and long reads (HiFi and ONT) were mapped onto the CR0040 assembly using BWA-MEM2 (Vasimuddin et al., 2019) and Minimap2 (Li, 2018), respectively. Sequencing depths were averaged for genomic windows of 20 kb. To detect sequencing depth bias and limit the risk of detecting false positives, the mean sequencing depth for every 20 successive 20-kb windows was computed using Illumina reads for Daphna and using long reads (HiFi and ONT) for CR0040. Identified regions were manually validated and refined by visualization of sequencing depth drops for each CR0040 chromosome and for all available sequencing datasets (see details in Supplemental Note 5).

### VGH

The VGH was constructed using the Tripal system, a specific toolkit for the construction of online community genomic databases, by integrating the GMOD Chado database schema and the Drupal open-source platform (<https://www.drupal.org/>). The VGH implements a set of interconnected modules and user-friendly interfaces (details in Supplemental Note 6).

### Data availability

The chromosome assembly and accompanying data received the following identifiers in NCBI: BioProject (with SRA database) ID: PRJNA753216 (haplotype A) and PRJNA754028 (haplotype B) BioSample (node) SAMN20691751.

RNA sequencing data are readily accessible on the NCBI portal: BioSamples SAMN20691786 (fruit), SAMN20691787 (leaf), SAMN20691788 (flower), SAMN20691789 (stem), SAMN20691790 (soil root), SAMN20691791 (aerial root), SAMN20691792 (bud), SAMN20691793 (flower bud), SAMN20691794 (ovary), SAMN20691795 (mixed tissues) and SRA: SRR15411867 (mixed tissues), SRR15411868 (ovary), SRR15411869 (flower bud), SRR15411870 (bud), SRR15411871 (aerial root), SRR15411872 (soil root), SRR15411873 (stem), SRR15411874 (flower), SRR15411875 (leaf), and SRR15411876 (fruit)

In addition, these data and various exploration tools are accessible at VGH (<https://vanilla-genome-hub.cirad.fr/>).

## SUPPLEMENTAL INFORMATION

Supplemental information can be found online at *Plant Communications Online*.

## FUNDING

This work was supported by grants from Eurovanille and V. Mane Films companies. The research was co-funded by the Centre de Coopération Internationale en Recherche Agronomique pour le Développement (CIRAD), the Université de La Réunion (UR), the Institut National de Recherche pour l'Agriculture l'Alimentation et l'Environnement (INRAE), the Centre National de la Recherche Scientifique (CNRS), and the Etablissement Vanille de Tahiti (EVT). This work was also supported by grants from the European Regional Development Fund (ERDF), the Conseil Régional de la Réunion, and the Conseil Départemental de la Réunion. This work was supported by France Génomique National infrastructure, funded as part of "Investissement d'avenir" program managed by Agence Nationale pour la Recherche (contrat ANR-10-INBS-09) and has also benefited from Imagerie-Gif core facility supported by l'Agence Nationale de la Recherche (ANR-11-EQPX-0029/Morphoscope, ANR-10-INBS-04/FranceBioImaging; ANR-11-IDEX-0003-02/Saclay Plant Sciences).

## AUTHOR CONTRIBUTIONS

C.J., M.D., M.G., and P.B. contributed to conceptualization of the study. C.C., C.J., G.S., M.B., M.D., O.B., S.B., and W.M. designed the experiments. M.B. and S.S.-Y. performed flow cytometry and cytogenetic experiments and analyses. L.B. and J.Z. contributed to the funding of the research, monitored the progress of the work, and supported the researchers throughout the project. C.C., C.L.-R., O.B., and W.M. performed nucleic acid preparation and sequencing. C.C., C.J., C.K., G.D., G.S., Q.P., S.B., and W.M. performed sequence analyses and assemblies. C.C., G.D., Q.P., S.B., and S.L.-A. performed genome annotation and built the genome hub. C.C., C.J., C.K., M.G., Q.P., and W.M. outlined the manuscript and wrote first drafts. C.C., C.J., C.K., C.L.-R., G.D., G.S., M.B., M.D., M.G., P.B., Q.P., S.B., S.S.-Y., and W.M. provided input and revisions to the manuscript.

## ACKNOWLEDGMENTS

We are grateful to Jean Bernard Dijoux and Katia Jade for preparing the plant material and to the Plant Protection Platform (3P, IBISA) for lab facilities and access to plant resources (BRC Vatel). We acknowledge the SouthGreen Bioinformatics Platform (<http://www.southgreen.fr/>) for access to computational resources and the GeT-PlaGe platform (INRAE, Toulouse, France) for the use of sequencing facilities. Finally, the authors would like to thank the reviewers for their suggestions, which helped to improve the manuscript. No conflict of interest is declared.

Received: October 30, 2021

Revised: April 10, 2022

Accepted: April 27, 2022

Published: May 5, 2022

## REFERENCES

- Armstrong, R.L., Penke, T., Chao, S.K., Gentile, G.M., Strahl, B.D., Matera, A.G., McKay, D.J., and Duronio, R.J. (2019). H3K9 promotes under-replication of pericentromeric heterochromatin in *Drosophila* salivary gland polytene chromosomes. *Genes* **10**:93. <https://doi.org/10.3390/genes10020093>.
- Bhosale, R., Boudolf, V., Cuevas, F., Lu, R., Eekhout, T., Hu, Z.B., Van Isterdael, G., Lambert, G.M., Xu, F., Nowack, M.K., et al. (2018). A spatiotemporal DNA endoploidy map of the Arabidopsis root reveals roles for the endocycle in root development and stress adaptation. *Plant Cell* **30**:2330–2351. <https://doi.org/10.1105/tpc.17.00983>.
- Bory, S. (2007). Diversity of *Vanilla planifolia* in the Indian Ocean and its Related Species : Genetics, Cytogenetics and Epigenetics Aspect (France: Université de La Réunion).

- Bory, S., Catrice, O., Brown, S., Leitch, I.J., Gigant, R., Chiroleu, F., Grisoni, M., Duval, M.F., and Besse, P.** (2008). Natural polyploidy in *Vanilla planifolia* (Orchidaceae). *Genome* **51**:816–826. <https://doi.org/10.1139/G08-068>.
- Bourdon, M., Pirrello, J., Cheniclet, C., Coriton, O., Bourge, M., Brown, S., Moise, A., Peypelut, M., Rouyere, V., Renaudin, J.P., et al.** (2012). Evidence for karyoplasmic homeostasis during endoreduplication and a ploidy-dependent increase in gene transcription during tomato fruit growth. *Development* **139**:3817–3826. <https://doi.org/10.1242/dev.084053>.
- Bracht, J.R., Fang, W., Goldman, A.D., Dolzhenko, E., Stein, E.M., and Landweber, L.F.** (2013). Genomes on the edge: programmed genome instability in ciliates. *Cell* **152**:406–416. <https://doi.org/10.1016/j.cell.2013.01.005>.
- Braz, G.T., do Vale Martins, L., Zhang, T., Albert, P.S., Birchler, J.A., and Jiang, J.M.** (2020). A universal chromosome identification system for maize and wild *Zea* species. *Chromosome Res.* **28**:183–194. <https://doi.org/10.1007/s10577-020-09630-5>.
- Brown, S.C., Bourge, M., Maunoury, N., Wong, M., Wolfe Bianchi, M., Lepers-Andrzejewski, S., Besse, P., Siljak-Yakovlev, S., Dron, M., and Satiat-Jeunemaitre, B.** (2017). DNA remodeling by strict partial endoreplication in orchids, an original process in the plant kingdom. *Genome Biol. Evol.* **9**:1051–1071. <https://doi.org/10.1093/gbe/evx063>.
- Cai, J., Liu, X., Vanneste, K., Proost, S., Tsai, W.C., Liu, K.W., Chen, L.J., He, Y., Xu, Q., Bian, C., et al.** (2015). The genome sequence of the orchid *Phalaenopsis equestris*. *Nat. Genet.* **47**:65–72. <https://doi.org/10.1038/ng.3149>.
- Chao, Y.T., Chen, W.C., Chen, C.Y., Ho, H.Y., Yeh, C.H., Kuo, Y.T., Su, C.L., Yen, S.H., Hsueh, H.Y., Yeh, J.H., et al.** (2018). Chromosome-level assembly, genetic and physical mapping of *Phalaenopsis aphrodite* genome provides new insights into species adaptation and resources for orchid breeding. *Plant Biotechnol. J.* **16**:2027–2041. <https://doi.org/10.1111/pbi.12936>.
- Cheng, H., Concepcion, G.T., Feng, X., Zhang, H., and Li, H.** (2021). Haplotype-resolved de novo assembly using phased assembly graphs with hifiasm. *Nat. Methods* **18**:170–175. <https://doi.org/10.1038/s41592-020-01056-5>.
- Chumová, Z., Záveská, E., Hloušková, P., Ponert, J., Schmidt, P.A., Certner, M., Mandáková, T., and Trávníček, P.** (2021). Repeat proliferation and partial endoreplication jointly shape the patterns of genome size evolution in orchids. *Plant J. Cel. Mol. Biol.* **107**:511–524. <https://doi.org/10.1111/tpj.15306>.
- Claudel-Renard, C., Chevalet, C., Faraut, T., and Kahn, D.** (2003). Enzyme-specific profiles for genome annotation: PRIAM. *Nucleic Acids Res.* **31**:6633–6639. <https://doi.org/10.1093/nar/gkg847>.
- De Veylder, L., Larkin, J.C., and Schnittger, A.** (2011). Molecular control and function of endoreplication in development and physiology. *Trends Plant Sci.* **16**:624–634. <https://doi.org/10.1016/j.tplants.2011.07.001>.
- Doležel, J., Bartoš, J., Voglmayr, H., and Greilhuber, J.** (2003). Letter to the editor. *Cytom. Part A* **51A**:127–128. <https://doi.org/10.1002/cyto.a.10013>.
- Du, K., Stock, M., Kneitz, S., Klopp, C., Woltering, J.M., Adolphi, M.C., Feron, R., Prokopov, D., Makunin, A., Kichigin, I., et al.** (2020). The sterlet sturgeon genome sequence and the mechanisms of segmental rediploidization. *Nat. Ecol. Evol.* **4**:841–852. <https://doi.org/10.1038/s41559-020-1166-x>.
- Emms, D.M., and Kelly, S.** (2019). OrthoFinder: phylogenetic orthology inference for comparative genomics. *Genome Biol.* **20**, 20Artn. <https://doi.org/10.1186/S13059-019-1832-Y>.
- Favre, F., Jourda, C., Grisoni, M., Piet, Q., Rivallan, R., Dijoux, J.B., Hascoat, J., Lepers-Andrzejewski, S., Besse, P., and Charron, C.** (2022). A genome-wide assessment of the genetic diversity, evolution and relationships with allied species of the clonally propagated crop *Vanilla planifolia* Jacks. *Ex Andrews. Genet. Resour. Crop Ev.* <https://doi.org/10.1007/s10722-022-01362-1>.
- Felix, L.P., and Guerra, M.** (2005). Basic chromosome numbers of terrestrial orchids. *Plant Syst. Evol.* **254**:131–148. <https://doi.org/10.1007/s00606-004-0200-9>.
- Flutre, T., Duprat, E., Feuillet, C., and Quesneville, H.** (2011). Considering transposable element diversification in de novo annotation approaches. *Plos One* **6**:e16526, 6ARTN. <https://doi.org/10.1371/journal.pone.0016526>.
- Flynn, J.M., Hubley, R., Goubert, C., Rosen, J., Clark, A.G., Feschotte, C., and Smit, A.F.** (2020). RepeatModeler2 for automated genomic discovery of transposable element families. *Proc. Natl. Acad. Sci. U S A* **117**:9451–9457. <https://doi.org/10.1073/pnas.1921046117>.
- Fu, L.M., Niu, B.F., Zhu, Z.W., Wu, S.T., and Li, W.Z.** (2012). CD-HIT: accelerated for clustering the next-generation sequencing data. *Bioinformatics* **28**:3150–3152. <https://doi.org/10.1093/bioinformatics/bts565>.
- Gurevich, A., Saveliev, V., Vyahhi, N., and Tesler, G.** (2013). QUAST: quality assessment tool for genome assemblies. *Bioinformatics* **29**:1072–1075. <https://doi.org/10.1093/bioinformatics/btt086>.
- Han, Y.H., Zhang, T., Thammaphichai, P., Weng, Y.Q., and Jiang, J.M.** (2015). Chromosome-specific painting in *Cucumis* species using bulked oligonucleotides. *Genetics* **200**:771–779. <https://doi.org/10.1534/genetics.115.177642>.
- Hasing, T., Tang, H.B., Brym, M., Khazi, F., Huang, T.F., and Chambers, A.H.** (2020). A phased *Vanilla planifolia* genome enables genetic improvement of flavour and production. *Nat. Food* **1**:811–819. <https://doi.org/10.1038/s43016-020-00197-2>.
- Hoede, C., Arnoux, S., Moisset, M., Chaumier, T., Inizan, O., Jamilloux, V., and Quesneville, H.** (2014). PASTEC: an automatic transposable element classification tool. *PLoS One* **9**:e91929, 9ARTN e91929. <https://doi.org/10.1371/journal.pone.0091929>.
- Hřibová, E., Holušová, K., Trávníček, P., Petrovská, B., Ponert, J., Šimková, H., Kubátová, B., Jersáková, J., Čurn, V., Suda, J., et al.** (2016). The enigma of progressively partial endoreplication: new insights provided by flow cytometry and next-generation sequencing. *Genome Biol. Evol.* **8**:1996–2005. <https://doi.org/10.1093/gbe/evw141>.
- Inada, N., Takahashi, N., and Umeda, M.** (2021). Arabidopsis thaliana subclass I ACTIN DEPOLYMERIZING FACTORS and vegetative ACTIN2/8 are novel regulators of endoreplication. *J. Plant Res.* **134**:1291–1300. <https://doi.org/10.1007/s10265-021-01333-0>.
- Jiang, J.M.** (2019). Fluorescence *in situ* hybridization in plants: recent developments and future applications. *Chromosome Res.* **27**:153–165. <https://doi.org/10.1007/s10577-019-09607-z>.
- Jones, P., Binns, D., Chang, H.Y., Fraser, M., Li, W., McAnulla, C., McWilliam, H., Maslen, J., Mitchell, A., Nuka, G., et al.** (2014). InterProScan 5: genome-scale protein function classification. *Bioinformatics (Oxford, England)* **30**:1236–1240. <https://doi.org/10.1093/bioinformatics/btu031>.
- Kanehisa, M., Sato, Y., and Morishima, K.** (2016). BlastKOALA and GhostKOALA: KEGG tools for functional characterization of genome and metagenome sequences. *J. Mol. Biol.* **428**:726–731. <https://doi.org/10.1016/j.jmb.2015.11.006>.
- Kim, D., Paggi, J.M., Park, C., Bennett, C., and Salzberg, S.L.** (2019). Graph-based genome alignment and genotyping with HISAT2 and HISAT-genotype. *Nat. Biotechnol.* **37**:907–915. <https://doi.org/10.1038/s41587-019-0201-4>.
- Lang, L., and Schnittger, A.** (2020). Endoreplication - a means to an end in cell growth and stress response. *Curr. Opin. Plant Biol.* **54**:85–92. <https://doi.org/10.1016/j.pbi.2020.02.006>.

- Lee, H.O., Davidson, J.M., and Duronio, R.J. (2009). Endoreplication: polyploidy with purpose. *Genes Dev.* **23**:2461–2477. <https://doi.org/10.1101/gad.1829209>.
- Lepers-Andrzejewski, S., Siljak-Yakovlev, S., Brown, S.C., Wong, M., and Dron, M. (2011). Diversity and dynamics of plant genome size: an example of polysomaty from a cytogenetic study of Tahitian vanilla (*Vanilla x tahitensis*, Orchidaceae). *Am. J. Bot.* **98**:986–997. <https://doi.org/10.3732/ajb.1000415>.
- Li, H. (2018). Minimap2: pairwise alignment for nucleotide sequences. *Bioinformatics* **34**:3094–3100. <https://doi.org/10.1093/bioinformatics/bty191>.
- Lilly, M.A., and Spradling, A.C. (1996). The *Drosophila* endocycle is controlled by Cyclin E and lacks a checkpoint ensuring S-phase completion. *Genes Dev.* **10**:2514–2526. <https://doi.org/10.1101/gad.10.19.2514>.
- Mapleson, D., Garcia Accinelli, G., Kettleborough, G., Wright, J., and Clavijo, B.J. (2017). KAT: a K-mer analysis toolkit to quality control NGS datasets and genome assemblies. *Bioinformatics* **33**, btw663–576. <https://doi.org/10.1093/bioinformatics/btw663>.
- Marcais, G., and Kingsford, C. (2011). A fast, lock-free approach for efficient parallel counting of occurrences of k-mers. *Bioinformatics* **27**:764–770. <https://doi.org/10.1093/bioinformatics/btr011>.
- do Vale Martins, L., Yu, F., Zhao, H.N., Dennison, T., Lauter, N., Wang, H.Y., Deng, Z.H., Thompson, A., Semrau, K., Rouillard, J.M., et al. (2019). Meiotic crossovers characterized by haplotype-specific chromosome painting in maize. *Nat. Commun.* **10**, 10Artn. <https://doi.org/10.1038/s41467-019-12646-z>.
- Matthews, B.J., Dudchenko, O., Kingan, S.B., Koren, S., Antoshechkin, I., Crawford, J.E., Glassford, W.J., Herre, M., Redmond, S.N., Rose, N.H., et al. (2018). Improved reference genome of *Aedes aegypti* informs arbovirus vector control. *Nature* **563**:501–507. <https://doi.org/10.1038/s41586-018-0692-z>.
- Munden, A., Rong, Z., Sun, A., Gangula, R., Mallal, S., and Nordman, J.T. (2018). Rif1 inhibits replication fork progression and controls DNA copy number in *Drosophila*. *eLife* **7**:e39140. <https://doi.org/10.7554/eLife.39140>.
- Nair, R.R., and Ravindran, P.N. (1994). Somatic association of chromosomes and other mitotic abnormalities in *Vanilla planifolia* (andrews). *Caryologia* **47**:65–73. <https://doi.org/10.1080/00087114.1994.10797284>.
- Perez-Silva, A., Odoux, E., Brat, P., Ribeyre, F., Rodriguez-Jimenes, G., Robles-Olvera, V., Garcia-Alvarado, M.A., and Gunata, Z. (2006). GC-MS and GC-olfactometry analysis of aroma compounds in a representative organic aroma extract from cured vanilla (*Vanilla planifolia* G. Jackson) beans. *Food Chem.* **99**:728–735. <https://doi.org/10.1016/j.foodchem.2005.08.050>.
- Quinlan, A.R., and Hall, I.M. (2010). BEDTools: a flexible suite of utilities for comparing genomic features. *Bioinformatics* **26**:841–842. <https://doi.org/10.1093/bioinformatics/btq033>.
- Ravindran, P.N. (1979). Nuclear behavior in the sterile pollen of *Vanilla planifolia* (andrews). *Cytologia* **44**:391–396. <https://doi.org/10.1508/cytologia.44.391>.
- Sallet, E., Gouzy, J., and Schiex, T. (2019). EuGene: an automated integrative gene finder for eukaryotes and prokaryotes. *Gene Prediction: Methods Protoc.* **1962**:97–120. [https://doi.org/10.1007/978-1-4939-9173-0\\_6](https://doi.org/10.1007/978-1-4939-9173-0_6).
- Sellis, D., Guérin, F., Arnaiz, O., Pett, W., Lerat, E., Boggetto, N., Krenek, S., Berendonk, T., Couloux, A., Aury, J.M., et al. (2021). Massive colonization of protein-coding exons by selfish genetic elements in *Paramecium* germline genomes. *PLoS Biol.* **19**:e3001309. <https://doi.org/10.1371/journal.pbio.3001309>.
- Shimotohno, A., Aki, S.S., Takahashi, N., and Umeda, M. (2021). Regulation of the plant cell cycle in response to hormones and the environment. *Annu. Rev. Plant Biol.* **72**:273–296. <https://doi.org/10.1146/annurev-arplant-080720-103739>.
- Simao, F.A., Waterhouse, R.M., Ioannidis, P., Kriventseva, E.V., and Zdobnov, E.M. (2015). BUSCO: assessing genome assembly and annotation completeness with single-copy orthologs. *Bioinformatics* **31**:3210–3212. <https://doi.org/10.1093/bioinformatics/btv351>.
- Stein, J.C., Yu, Y., Copetti, D., Zwickl, D.J., Zhang, L., Zhang, C., Chougule, K., Gao, D., Iwata, A., Goicoechea, J.L., et al. (2018). Genomes of 13 domesticated and wild rice relatives highlight genetic conservation, turnover and innovation across the genus *Oryza*. *Nat. Genet.* **50**:285–296. <https://doi.org/10.1038/s41588-018-0040-0>.
- Tarailo-Graovac, M., and Chen, N. (2009). Using RepeatMasker to identify repetitive elements in genomic sequences. In *Current Protocols in Bioinformatics*, A.D. Baxevanis, ed.
- Trávníček, P., Čertner, M., Ponert, J., Chumová, Z., Jersáková, J., and Suda, J. (2019). Diversity in genome size and GC content shows adaptive potential in orchids and is closely linked to partial endoreplication, plant life-history traits and climatic conditions. *New Phytol.* **224**:1642–1656. <https://doi.org/10.1111/nph.15996>.
- Trávníček, P., Ponert, J., Urfus, T., Jersáková, J., Vrána, J., Hřibová, E., Doležel, J., and Suda, J. (2015). Challenges of flow-cytometric estimation of nuclear genome size in orchids, a plant group with both whole-genome and progressively partial endoreplication. *Cytometry Part A. Journal Int. Soc. Anal. Cytol.* **87**:958–966. <https://doi.org/10.1002/cyto.a.22681>.
- Vaattovaara, A., Leppälä, J., Salojärvi, J., and Wrzaczek, M. (2019). High-throughput sequencing data and the impact of plant gene annotation quality. *J. Exp. Bot.* **70**:1069–1076. <https://doi.org/10.1093/jxb/ery434>.
- Vasimuddin, M., Misra, S., Li, H., and Aluru, S. (2019). Efficient architecture-aware acceleration of BWA-MEM for multicore systems. *Int. Parallel Distrib. P.* **314**–324. <https://doi.org/10.1109/Ipdp.2019.00041>.
- Wicker, T., Sabot, F., Hua-Van, A., Bennetzen, J.L., Capy, P., Chalhoub, B., Flavell, A., Leroy, P., Morgante, M., Panaud, O., et al. (2007). A unified classification system for eukaryotic transposable elements. *Nat. Rev. Genet.* **8**:973–982. <https://doi.org/10.1038/nrg2165>.
- Yen, E.C., McCarthy, S.A., Galarza, J.A., Generalovic, T.N., Pelan, S., Nguyen, P., Meier, J.I., Warren, I.A., Mappes, J., Durbin, R., et al. (2020). A haplotype-resolved, de novo genome assembly for the wood tiger moth (*Arctia plantaginis*) through trio binning. *GigaScience* **9**:giaa088, ARTN. <https://doi.org/10.1093/gigascience/giaa088>.
- Younis, A., Ramzan, F., Hwang, Y.J., and Lim, K.B. (2015). FISH and GISH: molecular cytogenetic tools and their applications in ornamental plants. *Plant Cell Rep.* **34**:1477–1488. <https://doi.org/10.1007/s00299-015-1828-3>.
- Zhang, T., Liu, G.Q., Zhao, H.N., Braz, G.T., and Jiang, J.M. (2021a). Chorus2: design of genome-scale oligonucleotide-based probes for fluorescence *in situ* hybridization. *Plant Biotechnol. J.* **19**:1967–1978. <https://doi.org/10.1111/pbi.13610>.
- Zhang, Y.X., Zhang, G.Q., Zhang, D.Y., Liu, X.D., Xu, X.Y., Sun, W.H., Yu, X., Zhu, X.E., Wang, Z.W., Zhao, X., et al. (2021b). Chromosome-scale assembly of the *Dendrobium chrysotoxum* genome enhances the understanding of orchid evolution. *Hortic. Res-England* **8**, 8 artn. <https://doi.org/10.1038/s41438-021-00621-z>.

**Supplemental information**

**A chromosome-level, haplotype-phased *Vanilla planifolia* genome highlights the challenge of partial endoreplication for accurate whole-genome assembly**

**Quentin Piet, Gaetan Droc, William Marande, Gautier Sarah, Stéphanie Bocs, Christophe Klopp, Mickael Bourge, Sonja Siljak-Yakovlev, Olivier Bouchez, Céline Lopez-Roques, Sandra Lepers-Andrzejewski, Laurent Bourgois, Joseph Zucca, Michel Dron, Pascale Besse, Michel Grisoni, Cyril Jourda, and Carine Charron**



## SUPPLEMENTAL INFORMATION

1  
2  
3  
4  
5  
6  
7  
8  
9  
10  
11  
12  
13  
14  
15  
16  
17  
18  
19  
20  
21  
22  
23  
24  
25  
26  
27  
28  
29  
30  
31  
32  
33  
34  
35

### Supplemental Note 1

#### Global strategy for the sequencing and assembly of *V. planifolia* CR0040 genome

The assembly of the CR0040 genome and the study of the partial endoreplication (PE) phenomenon required interdisciplinary work and a multitude of sequencing technologies, which has proven to be crucial for the detection to detect PE along the assembled chromosomes (Supplemental Figure 1).

#### Plant material

A traditional *Vanilla planifolia* cultivar from La Reunion was used for this study. It is conserved by CIRAD under the accession number CR-VA-00040 (“CR0040”) in the Biological Resources Center Vatel (Saint Pierre, La Réunion) where it is maintained by cuttings under shade-house and by *in vitro* culture established from axillary buds. The vitroplants were propagated by micro-cuttings in basal Murashige and Skoog media (Duchefa Biochemie, The Netherlands) without any phytohormone. They were grown at 24-26°C, 12H light/day. Morphological data and genetic analyses confirm its taxonomic position within the *V. planifolia* species (Bory et al., 2008; Bouétard et al., 2010; Favre et al., 2022), and its membership of the group of vanilla cultivars usually grown in the Indian Ocean region. The profile of aromatic precursors identified in its fruits is typical of vanillas used for Bourbon vanilla production (Perez-Silva et al., 2006).

#### Flow cytometry

The total nuclear DNA amount was assessed by flow cytometry (FCM) as described in Bourge et al. (2018). Internal reference used for cytometry was *Petunia hybrida* Vilm. “PxPc6” (2C=2.85 pg). Leaves of the internal standard and nodal tissues from three to five month-old *in vitro* *V. planifolia* CR0040 were chopped using a razor blade in a plastic Petri dish with 1 ml of Gif nuclei-isolation buffer (45 mM MgCl<sub>2</sub>, 30 mM sodium citrate, 60 mM MOPS, 1% (w/v) polyvinylpyrrolidone 10,000, pH 7.2) containing 0.2% (w/v) Triton X-100, supplemented with 5 mM sodium metabisulphite and RNase (2.5 U/mL). The suspension was filtered through 50-µm nylon mesh. The nuclei were stained with 70-100 µg/ml propidium iodide, a specific DNA fluorochrome intercalating dye, and kept 5 min at 4°C. DNA content of 5,000–10,000 stained nuclei were determined for each sample using a cytometer (CytoFLEX S, Beckman Coulter, Excitation 561 nm; emission through a 610/20 nm band-pass filter). Nuclei were identified by a gate on Side-Scatter and propidium iodide (PI)-Area and the cytogram of PI-Area versus PI-Height signals served to

36 select singlets, to eliminate doublets and to detect any degradation. Different cell ploidy levels were  
37 identified by their fluorescence intensity in PI, compared to the standard. The DNA histogram of  
38 nodal tissues from *Vanilla planifolia* CR0040 and nuclear classes in FCM samples are illustrated in  
39 the Supplemental Figure 2 and Supplemental Table 1, respectively. Note that there was a large  
40 variability between each endoploidy proportions for the 13 individuals.

41 The component F represents the Fixed part of the haploid genome which does not endoreplicate.  
42 The component P represents the part potentially participating in endoreplication. P and F are  
43 proportions (and not amounts) of the genome (%), whereas p and f are amounts (typically pg). Note  
44 that, as proportions, F and P have the same value whether referring to the haploid or to the diploid  
45 genome. As described in Brown et al. 2017, the replicate fraction P is assessed from the relative  
46 fluorescence intensity (I, arbitrary units) of peak#2 (4E, the first endocycle population) to peak#1  
47 (2C nuclei):  $P = [(I_{\text{peak2}} / I_{\text{peak1}}) - 1] \times 100$

48 In quantitative terms, the haploid nucleus is (1f+1p) pg, and diploid nucleus is (2f+2p) pg. So 4E  
49 nuclei have four copies of the part of the genome which replicates, and two copies of the rest of the  
50 genome which does not replicate, in total 2f+4p (pg). The 8E nuclei have 2f+8p (pg), etc.

51

## 52 **Cytogenetics**

53 Root tips were obtained from *Vanilla planifolia* CR0040 plantlets cultivated in vitro in the VATEL  
54 biological resource center based in La Réunion. They were pretreated with 0.05% colchicine  
55 aqueous solution at room temperature during 1h and then fixed in absolute ethanol and glacial  
56 acetic acid (3:1) for at least two days at 4 °C. Root tips were hydrolyzed in 1 M HCl for 12 min at  
57 60 °C, washed in distilled water at room temperature, and stained in 1% orcein in 45% acetic acid  
58 for about 30 min. Root tip meristems were squashed in a droplet of acetic carmine and observed  
59 under Zeiss Axiophot microscopes. Chromosome number was determined on five to seven well-  
60 spread metaphase plates from each of seven of those in vitro cultivated plantlets. The best  
61 metaphase plates were photographed using a CCD camera (RETIGA 2000R; Princeton Instruments,  
62 Evry, France).

63 For fluorochrome banding (Chromomycin A<sub>3</sub>, Hoechst 33258 and DAPI- 4',6-diamidino-2-  
64 phenylindole), the meristems were hydrolyzed for about 1 h at 37° C in an enzymatic mixture  
65 composed of 4% cellulase RS (Onozuka Yakult Honsha Co.), 1% pectolyase Y23 (Seishin  
66 Pharmaceutical Co, Tokyo, Japan), and 4% hemicellulase (Sigma Chemical Co) in 0.01M citrate  
67 buffer at pH 4.6. Thus, digested meristems were squashed into a drop of freshly prepared 50%  
68 acetic acid and the preparations were observed using an epifluorescence Zeiss Axiophot microscope  
69 with different combinations of excitation and emission filter sets (01, 07, 15, and triple 25). The  
70 best slides were frozen at -80°C at least during 12 h. The coverslips were removed and the slides

71 were rinsed with absolute ethanol and air-dried. To detect GC- and AT-rich DNA regions,  
72 meristematic tissue was stained respectively with chromomycin A<sub>3</sub> (CMA) (Serva, France)  
73 according to Schweizer (1976), and with Hoechst 33258 (Ho; Sigma) according to Martin and  
74 Hesemann (1988) with minor modifications of Siljak-Yakovlev et al. (2002). The slides were  
75 mounted in citifluor AF2 (Agar Scientific Oxford Instruments, Stanstead, UK). The DAPI was used  
76 to observe an unspecific heterochromatin. The acquisition and treatment of images were performed  
77 using a highly sensitive CCD camera (RETIGA 2000R, Princeton Instruments, Evry, France) and  
78 an image analyzer (MetaVue, Evry, France).

79

### 80 **High molecular weight DNA extraction and sequencing**

81 High molecular weight (HMW) DNA was extracted from 1g of nodal tissues from *in vitro* cultured  
82 *Vanilla planifolia* CR0040 in order to minimize the endoreplicated phenomenon using QIAGEN  
83 genomic tip kit. DNA libraries and sequencing were performed at GeT-PlaGe core facility, INRAe  
84 Toulouse.

85 The Sequel2 HiFi library preparation and sequencing were performed according to the  
86 manufacturer's instructions "Procedure and Checklist Preparing HiFi SMRTbell Libraries using  
87 SMRTbell Express Template Prep Kit 2.0". At each step, DNA was quantified using the Qubit  
88 dsDNA HS Assay Kit (Life Technologies). DNA purity was tested using the nanodrop  
89 (Thermofisher) and size distribution and degradation assessed using the Femto pulse Genomic DNA  
90 165 kb Kit (Agilent). Purification steps were performed using AMPure PB beads (PacBio) and  
91 15µg of DNA was purified then sheared at 15kb using the Megaruptor3 system (Diagenode). A  
92 single strand overhang removal and a DNA and END damage repair step were performed on 10µg  
93 of sample using SMRTbell Express Template prep kit 2.0. Then blunt hairpin adapters were ligated  
94 to the library. The library was treated with an exonuclease cocktail to digest unligated DNA  
95 fragments. A size selection step using a 12kb cutoff was performed on the BluePippin Size  
96 Selection system (Sage Science) with "0.75% DF Marker S1 3-10 kb Improved Recovery" protocol.  
97 Using Sequel® II Binding kit 2.0 and sequencing kit 2.0, the primer V2 annealed and polymerase  
98 2.0 bounded library was sequenced by diffusion loading onto 3 SMRTcells on Sequel2 instrument  
99 at 55pM with a 2 hours pre-extension and a 30 hours movie. HiFi reads are produced by calling  
100 consensus from subreads generated by multiple passes of the enzyme around a circularized template  
101 from a single zero mode waveguide. HiFi reads were generated with the "Circular Consensus  
102 Sequencing (CCS)" pipeline in SMRT Link v8.0 (ccs, version 4.0.0) with default parameters  
103 (minimum predicted accuracy of 0.99, minimum number of passes = 3)".

104 The Chromium libraries were prepared according to 10X Genomics' protocols using the Genome  
105 Reagent Kits v2. The sample quantity and quality controls were validated on Qubit, Nanodrop and

106 Femto. Optimal performance has been characterized on input gDNA with a mean length greater  
107 than 50 kb. The libraries were prepared from 3 µg of HMW gDNA (cut off at 50Kb using the  
108 BluePippin system). Briefly, in the microfluidic Genome Chip, a library of Genome Gel Beads is  
109 combined with HMW template gDNA in Master Mix and partitioning oil to create Gel Bead-In-  
110 EMulsions (GEMs) in the Chromium. Each Gel Bead is functionalized with millions of copies of a  
111 10x™ Barcoded primer. Upon dissolution of the Genome Gel Bead in the GEM, primers containing  
112 (i) an Illumina R1 sequence (Read 1 sequencing primer), (ii) a 16 bp 10x Barcode, and (iii) a 6 bp  
113 random primer sequence are released. Read 1 sequence and the 10x™ Barcode are added to the  
114 molecules during the GEM incubation. P5 and P7 primers, read 2, and sample index are added  
115 during library construction. 10 cycles of PCR were applied to amplify libraries. Library quality was  
116 assessed using a Fragment Analyser and libraries were quantified by QPCR using the Kapa Library  
117 Quantification Kit. The libraries have been performed on an Illumina HiSeq3000 using a paired-end  
118 read length of 2x150 pb with the Illumina HiSeq3000 sequencing kits.

119 Oxford Nanopore Technologies (ONT) library preparation and sequencing were performed  
120 according to the manufacturer's instructions "1D gDNA selecting for long reads (SQK-LSK109)".  
121 At each step, DNA was quantified using the Qubit dsDNA HS Assay Kit (Life Technologies). DNA  
122 purity was tested using the nanodrop (Thermofisher) and size distribution and degradation assessed  
123 using the Fragment analyzer (AATI) High Sensitivity DNA Fragment Analysis Kit. Purification  
124 steps were performed using AMPure XP beads (Beckman Coulter). 8 libraries were prepared, for  
125 each library, 5µg of DNA was purified then sheared at 20kb to 40kb using the megaruptor 1 system  
126 (diagenode). A one step DNA damage repair + END-repair + dA tail of double stranded DNA  
127 fragments was performed on 2µg of sample. Then adapters were ligated to the library. Libraries  
128 were loaded onto 3 R9.4.1 revD GridION flowcells and sequenced on GridION instrument at  
129 30fmol within 48H and onto 5 R9.4.1 revD PromethION flowcells and sequenced on PromethION  
130 instrument at 25 fmol within 72H.

131 DNA-seq data production per technology and instrument are indicated in the Supplemental Table 2.

132

### 133 **Ultra-HMW DNA extraction and Optical mapping**

134 Ultra-HMW DNA were purified from one gram of nodal tissues at the base of the young leaves  
135 according to the Bionano Prep Plant tissue DNA Isolation Liquid Nitrogen Grinding Protocol  
136 (30177 - Bionano Genomics) with the following specifications and modifications. Briefly, the  
137 tissues were broken in liquid nitrogen and then ground with rotor stator in the homogenization  
138 buffer. Nuclei were washed and then embedded in agarose plugs. After overnight proteinase K  
139 digestion in the presence of Lysis Buffer (Bionano Genomics) and one-hour treatment with RNase  
140 A (Qiagen), plugs were washed four times in 1x Wash Buffer (Bionano Genomics) and five times

141 in 1x TE Buffer (ThermoFisher Scientific). Then, plugs were melted two minutes at 70°C and  
142 solubilized with 2 µL of 0.5 U/µL AGARase enzyme (ThermoFisher Scientific) for 45 minutes at  
143 43°C. A dialysis step was performed in 1x TE Buffer (ThermoFisher Scientific) for 45 minutes to  
144 purify DNA from any residues. The DNA samples were quantified by using the Qubit dsDNA BR  
145 Assay (Invitrogen). The presence of mega base size DNA was visualized by pulsed field gel  
146 electrophoresis. Labeling and staining of the uHMW DNA were performed according to the  
147 Bionano Prep Direct Label and Stain (DLS) protocol (30206 - Bionano Genomics). Briefly, labeling  
148 was performed by incubating 750 ng genomic DNA with 1× DLE-1 Enzyme (Bionano Genomics)  
149 for 2 hours in the presence of 1× DL-Green (Bionano Genomics) and 1× DLE-1 Buffer (Bionano  
150 Genomics). Following proteinase K digestion and DL-Green cleanup, the DNA backbone was  
151 stained by mixing the labeled DNA with DNA Stain solution (Bionano Genomics) in presence of  
152 1× Flow Buffer (Bionano Genomics) and 1× DTT (Bionano Genomics), and incubating overnight at  
153 room temperature. The DLS DNA concentration was measured with the Qubit dsDNA HS Assay  
154 (Invitrogen). Labelled and stained DNA was loaded on the Saphyr chip. Loading of the chip and  
155 running of the Bionano Genomics Saphyr System were all performed according to the Saphyr  
156 System User Guide (30247 - Bionano Genomics). Data processing was performed using the  
157 Bionano Genomics Access software (<https://bionanogenomics.com/support-page/bionano-access-software/>). A total of 590 Gb data with molecules larger than 150kb was produced and then *de novo*  
159 assembled according to the Access software. It produced 950 genome maps with a N50 of 4.6 Mbp  
160 for a total genome map length of 2,115 Gbp.

161

162

## 163 **Supplemental Note 2**

164

### 165 **Genome assembly and pseudomolecules construction**

166 Illumina 10X, ONT and PacBio HiFi reads were assembled using respectively Supernova (v.2.1.1,  
167 Weisenfeld et al., 2017), Flye (v.2.4.2-release, <https://github.com/fenderglass/Flye>, Kolmogorov et  
168 al., 2019) followed by three iterative polishing with Illumina data using Pilon (v.1.22,  
169 <https://github.com/broadinstitute/pilon>, Walker et al., 2014) and Hifiasm v.0.13 (Cheng et al.,  
170 2021), with default parameters. A meta-assembly of corrected ONT reads from Canu and PacBio  
171 HiFi reads was tentatively generated using Hifiasm. The assembly metrics were computed with  
172 QUAST 5.1.0 (Gurevich et al., 2013) and summarized in Supplemental Table 3.

173 Hybrid scaffolding was performed between the best assembly (PacBio HiFi assembly) and optical  
174 genome maps with hybridScaffold pipeline and default parameters  
175 (<https://bionanogenomics.com/wp-content/uploads/2018/04/30073-Bionano-Solve-Theory-of->

176 Operation-Hybrid-Scaffold.pdf). We obtained 874 hybrid scaffolds with the maximum size of 32  
177 Mb, reaching 1.9 Gb and N50 of 6.2Mb. The not anchored contigs represent 1,529 Mb and 23,037  
178 contigs from the PacBio assembly. This hybrid scaffold file is composed of the 2 allelic versions of  
179 the genome. In order to separate the alleles, we used an in-house script. Briefly, the fasta file is  
180 transformed into an optical maps file (.cmap). This cmap file is aligned against itself using Bionano  
181 tools to create a xmap file that has the information of all the scaffold id that align against each  
182 scaffold id. With this information, a parsing algorithm, coded in java, produces 2 files with 1 allele  
183 in each file. Contigs not belonging to scaffolds were split among haplotype using purge dups  
184 ([https://github.com/dfguan/purge\\_dups](https://github.com/dfguan/purge_dups)). We then only kept contigs that were unassigned to  
185 scaffolds and added those from the “hap” file to haplotype A and those from the “purged” file to  
186 haplotype B. To organize the scaffolds into pseudomolecules, haplotype A fasta file was aligned  
187 against *Daphna* haplotype A chromosomes using the same Bionano tools. In that way, 36 scaffolds  
188 were organized in 14 chromosomes for haplotype A and 49 scaffolds for haplotype B.

189

### 190 **Evaluation of assembly quality**

191 The metrics for the best assembly were: assembly for haplotype A has 1.5 Gb, N50 = 3 Mb and  
192 3,874 scaffolds or contigs and assembly for haplotype B has 1.9 Gb, N50 =0.4Mb and 17,655  
193 scaffolds or contigs (Supplemental Table 4). We then looked for universal single copy orthologs  
194 genes with BUSCO 5.0.0. This analysis was done for the whole assembly and for both haplotypes  
195 apart on three levels of taxonomy using the following databases: *viridiplantae\_odb10*,  
196 *embryophyta\_odb10* and *liliopsida\_odb10* (Supplemental Table 5).

197

198

### 199 **Supplemental Note 3**

200

### 201 **RNA extraction and sequencing**

202 Total RNA was extracted from nine organs (fruit, leaf, flower, stem, soil root, aerial root, axillary  
203 stem bud, flower bud and ovary) using the RNeasy Plant Mini kit, according to the manufacturer’s  
204 protocol (Qiagen, Hilden, Germany). RNA purity, quantification, and integrity were evaluated using  
205 a NanoDrop 2000 spectrophotometer (Thermo Scientific, USA) and Agilent 4200 bioanalyzer  
206 (Agilent Technologies, Santa Clara, CA, USA). Only samples with an RNA Integrity Number  
207 (RIN)  $\geq 8$  were subjected to subsequent analysis and indicated in Supplemental Table 6.

208 RNA-seq libraries were prepared according to Illumina’s protocols using the Illumina TruSeq  
209 Stranded mRNA sample prep kit to analyze mRNA at the GeT-PlaGe core facility, INRAe  
210 Toulouse. Briefly, mRNAs were selected using poly-T beads and then fragmented to generate

211 double stranded cDNA. Adaptors were ligated to cDNA and 11 cycles of PCR were applied to  
212 amplify libraries. Library quality was assessed using a Fragment Analyzer and then quantified by  
213 qPCR using the Kapa Library Quantification Kit. RNA-seq experiments were performed on an  
214 Illumina NovaSeq using a paired-end read length of 2x150 pb with the Illumina NovaSeq  
215 sequencing kits.

216

### 217 **RNA-seq assembly and gene expression**

218 RNA-seq reads of ten samples (the nine sequenced organs and a mix of them) were mapped onto  
219 the *Vanilla planifolia* CR0040 contig assembly using hisat2 (v.2.1.0) with default parameters (Kim  
220 et al., 2019), which resulted in one alignment file per sample. Each of these files were then  
221 coordinate-sorted and converted to BAM format in order for them to be compatible with the  
222 StringTie (v.2.0.3, Pertea et al., 2015), the RNA-seq alignment assembler used with default  
223 parameters. The resulting output files (gtf format) were used for a last StringTie run with the "--  
224 merge" option, thus producing a non-redundant set of transcripts as a single output file,  
225 corresponding to the final set of assembled transcripts. Main statistics of the RNA-seq experiment  
226 are detailed in Supplemental Table 7.

227 To estimate gene expression in the nine different tissues and to identify putative novel isoforms, we  
228 followed the StringTie's recommended protocol by realigning the corresponding RNA-Seq reads to  
229 the reference with hisat2 (v.2.2.1) using perl scripts provided by hisat2 (*extract\_exon.py* and  
230 *extract\_splice\_sites.py*) to extract exon and splice site information from the annotation of the  
231 CR0040 final assembly. Alignment files were sorted by coordinates and converted to BAM format  
232 with the samtools utility (v.1.10). Then, RNA-seq reads were assembled using StringTie (v.2.0.3)  
233 with a GTF file containing transcripts coordinates from the annotation of the CR0040 assembly (-G  
234 option to specify the file), that is used to guide the assembly. The output files were then merged to  
235 remove redundancy between samples (StringTie v.2.0.3 with --merge and -G options) and to  
236 generate a single gtf file containing their coordinates. Finally, a final StringTie run was performed  
237 in order to re-estimate transcript abundance and generate read coverage tables (-B and -e options  
238 were used) for each sample, in regards to the merged set (-G option). These tables were then used  
239 by the prepDe.py script to compute genes and transcripts count matrices (see RNA-seq tracks in  
240 <https://vanilla-genome-hub.cirad.fr/content/v-planifolia-cr0040>).

241 A BUSCO analysis was performed using the Viridiplantae database to estimate the genic  
242 completeness for each transcriptome and for merged transcriptomes (Supplemental Table 8).

243

### 244 **Structural and functional genome annotation**

245 Automatic gene prediction was performed using EuGene Eukaryotic Pipeline (EGNEP v.1.5 with  
246 EuGene v.4.2a), an integrative gene finder software that is able to combine several sources of  
247 information in order to predict genes (Sallet et al., 2019). This pipeline can infer a structural gene  
248 annotation considering homology with known sequences, structural information in the form of  
249 GFF3 files and statistical information.

250 EuGene's internal prediction model can be built and trained using proteomic and transcriptomic  
251 data. Thus, a set of annotated *V. planifolia* *Daphna* proteins (NCBI Genomes: haplotype A,  
252 BioProject Accession: PRJNA633886, GenBank assembly accession: GCA\_016413895.1 and  
253 haplotype B, BioProject Accession: PRJNA668740, GenBank assembly accession:  
254 GCA\_016413885.1) as well as a combination of the non-redundant set of transcripts of *V. planifolia*  
255 CR0040 assembled with Stringtie and the *V. planifolia* *Daphna* annotated transcripts  
256 (\*.rna\_from\_genomic.fna.gz) were submitted to the pipeline for this task. The rest of the proteomic  
257 data used as evidence are a combination of *Phalaenopsis equestris* proteins retrieved from RefSeq  
258 (NCBI RefSeq Genome: BioProject Accession: PRJNA382149, Annotation Release 100 accession:  
259 GCF\_001263595.1) and the Uniprot/Swissprot *Liliopsida* database (2020\_06 version). One Trinity  
260 assembly of a *Vanilla planifolia* *Jacks* (Solano-De la Cruz et al., 2019) retrieved from the NCBI  
261 database (NCBI Transcriptome: BioProject Accession: PRJNA554104, GEO Series: GSE134155)  
262 was also used as transcriptomic evidence. The pipeline comes with repeat detection software such  
263 as Red (Girgis et al., 2015) and LTRharvest (Ellinghaus et al., 2008), and similarity searches against  
264 RepBase (REPET, version 20.05) are also performed to clean the proteomic datasets at the start of  
265 the annotation process.

266 As EuGene also uses statistical models for splice sites detection, we built an orchids specific model  
267 from the genomic and transcriptomic data of *V. planifolia* *Daphna*, *Dendrobium catenatum* (NCBI  
268 RefSeq Genome: BioProject Accession: PRJNA453230, Annotation Release 101 acc:  
269 GCF\_001605985.2), *Phalaenopsis equestris* (NCBI RefSeq), and our *V. planifolia* CR0040 clone  
270 using the `egn_build_wam.pl` companion script.

271 In order to assign functions to the predicted protein coding genes. InterProScan domain searches as  
272 well as similarity searches (BlastP) against Uniprot/Swissprot and Uniprot/TrEMBL databases were  
273 performed. Putative gene models were sorted into six confidence classes (from ISS\_1 to ISS\_6)  
274 based on their functional annotation. In order to filter protein coding genes, ISS\_6 genes (96,224  
275 sequences), ISS\_5 genes with protein sequence shorter than 150 amino acids (aa) and with  
276 untranslated region (UTR) shorter than 35 base pairs (bp), and ISS\_4 genes with protein sequences  
277 shorter than 80 amino acids and without UTR sequence were removed (98,718 sequences). Among  
278 remaining putative genes, ISS\_5 genes, ISS\_4 genes and ISS\_3 fragments genes coding for protein  
279 sequences with matches in RepBase were also removed (3,527 sequences). In addition, putative



280 gene models with protein sequences predicted to have MULE transposase interpro domains  
281 (IPR018289) without match on FAR protein (FAR-RED impaired response 1, transcription  
282 activator that derived from ancient transposases) domain (IPR031052), or reverse transcriptase  
283 domain (IPR000477) without NMAT (nuclear intron maturase 1 mitochondrial, IPR024937)  
284 domain and TERT family domains (telomerase reverse transcriptase, IPR003545) were removed  
285 (589 sequences). Putative genes encoding for gagpol polyprotein and not associated to  
286 Benchmarking Universal Single-Copy Orthologs (BUSCO) and putative genes located on  
287 organellar contigs were removed (23,237 sequences). After filtering steps, 59,128 high-confidence  
288 protein coding genes were kept. The number of these genes per chromosome and per haplotype as  
289 well as main statistics of these genes are indicated in the Supplemental Tables 9 and 12.

290 Functions were assigned through InterProScan domain searches as well as similarity searches  
291 against Uniprot/Swissprot and Uniprot/TrEMBL databases (BlastP). Gene Ontology (GO) terms  
292 were assigned through InterProScan (Jones et al., 2014) results while Enzyme Classification (EC)  
293 numbers were predicted combining both tools PRIAM (Claudel-Renard et al., 2003) and  
294 BlastKOALA (Kanehisa et al., 2016).

295 Enzymes and metabolic pathways were predicted from the protein-coding genes using Pathway  
296 Tools (Karp et al., 2002). A file in the PathoLogic format was created, which included gene  
297 functional descriptions, GO terms and enzyme commission numbers. This file will be used to set up  
298 Pathways tools (see Supplemental Note 6). In order to assess the completeness of the resulting set  
299 of protein coding gene models, a BUSCO (Benchmarking Universal Single-Copy Orthologs)  
300 analysis (v4.0.5) was carried out using three different databases, namely Viridiplantae,  
301 Embryophyta and Liliopsida (Supplemental Table 10).

302 From repeats detected by EGNEP, 1,472 interspersed repeats were selected based on the consensi  
303 found by RepeatModeler (v2.0.1) (Flynn et al., 2020), enriched with consensi of RepeatScout  
304 (v1.0.5) (Price et al, 2005) and transposable element genes (TEG) predicted from EGNEP (REGN  
305 TEG), according to the following procedure of classification, filtering and clustering.

306 Consensi families were generated by RepeatScout (RS) and RepeatModeler (RM) from the CR0040  
307 genome assembly (21,529 sequences): 1,247 TEG, 1,958 RS consensi and 1,236 RM consensi were  
308 then classified with REPET (v3.0) and PASTEC (v2.0) (Hoede et al., 2014) according to the  
309 Wicker's TE classification (Wicker et al., 2007) and using RepBase (REPET, version 23.12),  
310 cleaned by removing SSR and rDNA sequences, requalified with REPET postProcessClassif.py,  
311 then potential host genes were removed and finally clustered with CD-HIT (v4.8.1) (Fu et al.,  
312 2012). A first clustering (cd-hit -c 1 -sc 1) was made between the three filtered sets (1,072 RM,  
313 1,748 RS and 284 TEG) to remove identical sequences. 46 repetitive sequences were removed by  
314 manual curation of the 42 clusters with more than 2 sequences (out of the 3,057 CD-HIT clusters

315 including 3,015 singletons) leading to 3,058 sequences. A second clustering (cd-hit -c 0.85 -sc 1 -aS  
316 0.75) was made on the 3,058 sequences to help us to select 767 transposable elements TE, as  
317 follow: 338 RM TEs, 103 RS TE CD-HIT cluster representatives, 35 REGN TEG cluster  
318 representatives, 7 RS SINEs (RSX) that were not cluster representatives, 259 RS TE singletons not  
319 classified as unknown retrotransposon (RXX) and 25 REGN TEG singletons classified as DNA  
320 transposon (DTX). A third clustering (cd-hit -c 0.85 -sc 1 -aS 0.75) was made on the 693 RM  
321 unknown interspersed repeats (neither classified by RM nor by PASTEC) leading to a reduction of  
322 the set to 639 sequences. This sequence set was concatenated with the 66 RS TE singletons of the  
323 previous clustering and classified as unknown retrotransposon (RXX) and considered as doubtful  
324 TE, leading to 705 unknown interspersed repeats. Then, the genome assembly was annotated with  
325 RepeatMasker (v4.1.1, Tarailo-Graovac et al, 2009) using the two CR0040 interspersed repeat  
326 banks separately (sequences of 767 transposable elements and 705 unknown interspersed repeats  
327 available at <https://vanilla-genome-hub.cirad.fr/filebrowser/download/188>). Bedtools intersect  
328 (v2.29.2, Quinlan et al., 2010) allowed the TE annotation to be given priority over the unknown  
329 interspersed repeat annotation. Summary report of the repeat annotation is detailed in the  
330 Supplemental Table 11.

331

332

#### 333 **Supplemental Note 4**

334

#### 335 **Gene families clustering**

336 Polypeptide sequences of five plant species and CR0040 (14 chromosomes and CR0040\_A0 and  
337 CR0040\_B0 random mosaic chromosomes of unanchored scaffolds) were retrieved in order to carry  
338 out comparative genomic analyses between them: *Arabidopsis thaliana* (TAIR10, Phytozome)  
339 (Lamesch et al., 2012), *Oryza sativa* (IRGSP-1.0, RAP-DB), *Phalaenopsis equestris* (NCBI  
340 RefSeq), *Vanilla planifolia* Daphna (NCBI Genomes) and *Phalaenopsis aphrodite* (Orchidstra 2.0,  
341 Chao et al., 2017). For genes with alternative splicing variants, only the polypeptide corresponding  
342 to the longest transcript was kept and the two haplotypes of each *V. planifolia* cultivar were  
343 separated for the analyses. A total of 237,645 proteins were clustered with Orthofinder2 (v.2.4.0)  
344 using default parameters (Emms et al., 2019). A total of 212,852 proteins (89.5%) were clustered to  
345 27,815 orthogroups (<https://vanilla-genome-hub.cirad.fr/filebrowser/download/187>) with 10.5% of  
346 the whole set were part of species-specific orthogroups, 8,317 were conserved in all the  
347 species/haplotypes and 1,426 corresponded to single-copy orthogroups. With this Orthofinder  
348 analysis, made from proteomes derived from the 14 chromosomes and unanchored scaffolds, we  
349 began to glimpse into the vanilla pangenome. The vanilla core genome is composed of 14,403

350 families and 86,688 genes, common to both CR40 and Daphna genomes. The dispensable genome  
351 of CR0040 contains 3,637 families and 17,258 genes specific to CR0040. The dispensable genome  
352 of Daphna contains 3,804 Daphna specific families and 13,529 genes.

353 The inferred orthogroups were visualized with the UpsetR (Conway et al., 2017) R package to  
354 generate the UpSet plot (Supplemental Figure 5). Among the compared datasets, 596 orthogroups  
355 were only shared by orchids and 1,029 were only shared by the 4 haplotypes of *V. planifolia*  
356 (Daphna and CR0040). Number of conserved and specific gene groups are detailed in the  
357 Supplemental Table 14.

358

### 359 **Expansion and reduction of gene families with CAFE**

360 Forty-seven protein coding genes involved in cell cycle regulation in *A. thaliana* were focused on  
361 (Supplemental Table 17), and orthogroups containing them were analyzed in terms of family  
362 evolution using CAFE (v5, Mendes et al., 2020). Orthogroups showing expansions and/or  
363 contractions in copy numbers, among the six compared plant lineages, were identified using a P  
364 value threshold of 0.001. For this, orthogroups (made from proteomes derived from the 14  
365 chromosomes only) and the species tree produced by orthofinder were used as input. Prior to this  
366 analysis, orthogroups that contained genes in only one species or with more than 100 gene copies  
367 for at least one species were removed. The species tree was made into an ultrametric one with the  
368 `make_ultrametric_tree.py` script bundled with the orthofinder package using an original divergence  
369 of 152 Mya for the analyzed species, as referenced in the TreeTime database (Kumar et al., 2017).  
370 These filtered orthogroups, and the ultrametric species tree were utilized to estimate the  
371 expansion/contraction of orthogroups using one lambda ( $\lambda$ ) model, where  $\lambda$  is a random birth-death  
372 parameter.

373

### 374 **Construction of syntenic blocks**

375 The SynMap workflow (Haug-Baltzell et al., 2017) of the CoGe comparative genomics platform  
376 (Lyons and Freeling, 2008) was used to generate syntenic dotplots between two organism genomes  
377 (haplotypes A of CR0040 and Daphna, as well as *P. aphrodite*). SynMap relies on pairwise  
378 comparison of Coding Sequences (CDS) between the two genomes and allows to compute the  
379 synonymous mutation rate of syntenic CDS pairs.

380 SynMap requires the genome sequence and a gene annotation file of each compared organism. Prior  
381 to the analyses, annotated genes in each species were filtered to keep only the longest isoform of  
382 each gene. For each genome in the comparison, the chromosome fasta file and the gene annotation  
383 gff3 file were loaded using the iCommands to the CyVerse's cloud-based Data Store. Be careful  
384 that all CDS of the same mRNA (e.g. ID=VANPL\_A\_00001g000010.mRNA1) should have the

385 same identifier (e.g. ID=VANPL\_A\_00001c000010; Parent=VANPL\_A\_00001g000010.mRNA1)  
386 otherwise SynMap will overestimate the number of CDSs and this will cause problems during the  
387 tandem gene filtering step. First, tandem duplications are filtered out with the blast\_to\_raw program  
388 (SynMap Analysis Log file of CR0040\_A,  
389 <https://genomeevolution.org/coge/data/diags/62209/62209/1j9ym.log>, source code  
390 <https://github.com/LyonsLab/coge>). Syntenic pairs of CDSs are then identified by finding collinear  
391 series of putative homologous sequences using DAGChainer (Haas et al., 2004). A global alignment  
392 is performed on these syntenic CDS pairs using the Needleman-Wunsch algorithm implemented in  
393 nwalgn (<https://pypi.org/project/nwalgn/>) using the BLOSUM62 scoring matrix, after which a  
394 back translation of this alignment into a codon alignment is processed. Then, codeml-coge, a  
395 modified implementation of CodeML from the PAML package (Yang et al., 2007) is used to  
396 compute the rate of synonymous substitutions per synonymous site for each pair of CDSs (dS called  
397 Ks on the SynMap interface). In the particular case where a genome was aligned against itself, the  
398 identical CDS pairs were removed from the analysis and therefore do not appear in either the  
399 SynMap dotplot (no dots on the central diagonal) or the Ks distribution. However, the dotplot is  
400 symmetrical around the central diagonal so only half the dotplot can be considered.

401

#### 402 **Visual quality control of the assemblies and whole genome duplication exploration using** 403 **pairwise orchid genome synteny**

404 In order to check the quality of the 14 chromosomes of the CR0040 A haplotype (CR0040\_A) *V.*  
405 *planifolia* genome, to compare the 14 chromosomes of haplotype A of both *Vanilla* cultivars and to  
406 study the pan-orchid alpha Whole Genome Duplication ( $\alpha^o$  WGD), a series of analyses were  
407 performed with the CoGe Synmap pipeline, as described above. Synmap pairwise genome synteny  
408 analyses between CR0040\_A and Daphna A haplotype (D\_A) and between themselves were  
409 illustrated in the Supplemental Figure 7. The dotplot of the CDS pairs of the 14 chromosomes of  
410 CR0040\_A (Supplemental Figure 7E) and the histogram of the CDS pair Ks values (Supplemental  
411 Figure 7F) gives a genomic representation suggesting that the 14 chromosomes of CR0040\_A and  
412 the gene annotation is complete and of high quality. The comparison of the CR0040\_A dotplot with  
413 the D\_A dotplot (Supplemental Figure 7A) shows that CR0040 A looks cleaner, with more  
414 continuous paralog diagonals. Also, the dotplot of D\_A CDS against itself displays an unexpected  
415 dotted central diagonal indicating physically close duplicated genes. The cyan color of the diagonal  
416 indicates that the similar CDS pairs belong to the peak with a very low number of synonymous  
417 substitutions per synonymous site ( $\log_{10}(Ks) \approx -1.5$ , light blue bars in the Supplemental Figure 7B).  
418 This artificial peak would correspond to allelic forms due to the heterozygosity and not to WGD  
419 paralogs. This peak could come from a problem of dual haplotype conservation during contig

420 phasing (difficulties to separate the two haplotypes when too close). The D\_A karyotype illustrating  
421 the  $\alpha^\circ$  WGD (Hasing et al., 2020) was aligned onto the 14 chromosomes of the D\_A to identify by  
422 projection the dotplot diagonals corresponding to these 13 blocks of ohnologs ( $\alpha^\circ$  WGD paralogs).  
423 The ancestral karyotype of CR0040\_A was drawn, using an in-house Perl script, from the D\_A  
424 gene pair blocks (Table S10 in Hasing et al., 2020), transferred to CR0040\_A genes via reciprocal  
425 best hits computed in Supplemental Note 6. On the CR0040\_A dotplot, the diagonals corresponding  
426 to the 13 ohnologous blocks were also found, but with slight differences. For example, the  
427 difference found for block number 13, between chromosome 10 and 11, could be due to the fact that  
428 CR0040\_A chromosome 11 (47 Mb with Ns; Supplemental Table 12) is longer than the D\_A  
429 chromosome 11 (38 Mb; Supplemental Table 13). Similarly, on the dotplot of D\_A versus  
430 CR0040\_A (Supplemental Figure 7D), the karyotypes were aligned along the 14 chromosomes,  
431 allowing to find the diagonals corresponding to the 13 ohnolog blocks present on D\_A and  
432 CR0040\_A. The histogram of Ks values of CDS pairs between D\_A and CR0040\_A (Supplemental  
433 Figure 7C) shows two distinct peaks. The first one corresponds to allelic gene pairs between D\_A  
434 and CR0040\_A and the second one to ohnolog pairs. These analyses validate the already known  
435 pan-orchid WGD. Additional short diagonals on the CR0040\_A dotplot and the second peak on the  
436 CR0040\_A Ks histogram suggest an older WGD, probably the tau ( $\tau^m$ ) of Monocots (Hasing et al.,  
437 2020). The blue-green diagonals would correspond to the  $\alpha^\circ$  WGD (*e.g.*  $\log_{10}(Ks) < 0.2$ ) while the  
438 shorter green-red ones would correspond to the monocot  $\tau^m$  WGD (*e.g.*  $\log_{10}(Ks) > 0.2$ ). The  
439 paralogous diagonals between chromosomes 3-5-6-14 could be taken as an example on the  
440 CR0040\_A dotplot (Supplemental Figure 7E). Knowing that the  $\alpha^\circ$  WGD is relatively old (90 Mya;  
441 Hasing et al., 2020) and the sequence of the 14 pseudomolecules of CR0040\_A is of high fidelity, it  
442 is possible that  $\tau^m$  traces are seen. The biology of the species is also a consideration. Vanilla is  
443 perennial with predominant vegetative multiplication that could decrease the mutation rate (Sandler  
444 et al., 2020). The classical formula  $T = Ks / (2r)$  was applied, on a rough example from  
445 Supplemental Figure 7F, with a mutation rate 'r' of 6.5E-9 synonymous substitutions per  
446 synonymous site per generation (Tang et al., 2010). For instance, with a  $\log_{10}(Ks)$  peak median of  
447 0.09, then the  $\alpha^\circ$  WGD would be dated at  $\approx 95$  Mya and with a median at 0.35, the  $\tau^m$  WGD would  
448 be dated at  $\approx 172$  Mya, in agreement with Jiao et al., 2014.

449 Missing pairs of chromosomes 15 and 16 in the *V. planifolia* genome were tentatively searched by  
450 comparison with the *P. aphrodite* genome. Due to problems with *P. aphrodite* CDS positions at the  
451 chromosome level, gene sequences of *P. aphrodite* contigs were aligned to the *P. aphrodite*  
452 chromosomes using Liftoff (Shumate and Salzberg, 2021) as described in Supplemental Note 6 and  
453 these results were used for comparative genomics with CR0040 haplotype A sequence. Synmap  
454 pairwise genome synteny analyses of the 14 pseudomolecules of CR0040\_A *V. planifolia*, the

455 pseudomolecules and longest scaffolds of *P. aphrodite* and between themselves were illustrated in  
456 the Supplemental Figure 8.

457 A first correspondence between the chromosomes of the two species was obtained using the  
458 SynMap Syntenic path assembly (SPA) option (Supplemental Figure 8D, see correspondences at  
459 [https://genomeevolution.org/coge/data/diags/62209/62346/html/master\\_62209\\_62346.CDS-](https://genomeevolution.org/coge/data/diags/62209/62346/html/master_62209_62346.CDS-)  
460 [CDS-last.tdd10.cs0.filtered.dag.all.go\\_D20\\_g10\\_A5.aligncoords.gcoords\\_ct0.w1000.spa-](https://genomeevolution.org/coge/data/diags/62209/62346/html/master_62209_62346.CDS-last.tdd10.cs0.filtered.dag.all.go_D20_g10_A5.aligncoords.gcoords_ct0.w1000.spa-1.mcs1000000.ks.sr.cs1.csoN.log.nsd.spa_info.txt)  
461 [1.mcs1000000.ks.sr.cs1.csoN.log.nsd.spa\\_info.txt](https://genomeevolution.org/coge/data/diags/62209/62346/html/master_62209_62346.CDS-last.tdd10.cs0.filtered.dag.all.go_D20_g10_A5.aligncoords.gcoords_ct0.w1000.spa-1.mcs1000000.ks.sr.cs1.csoN.log.nsd.spa_info.txt)). This initial analysis does not show any *P.*  
462 *aphrodite*'s chromosomes that would not have a match in CR0040. Given the information available:  
463 genome size, chromosome size, complete BUSCO score for the annotated protein coding genes, and  
464 comparative genomics results, there is no strong evidence that essential protein-coding genes are  
465 missing from the current CR0040 genome assembly (chromosomes 15 and 16 would be in the  
466 unplaced scaffolds).

467 Comparison between CR0040 and *P. aphrodite* for the analysis of the pan-orchid WGD is difficult,  
468 in part because the 19 chromosomes of the latter are not well enough assembled. However, the  
469 chromosome 1 of CR0040 contains internal duplications as if the same two ancestral chromosomes  
470 (pre- $\alpha^\circ$  WGD) had been merged (Supplemental Figure 8C). This is not observed in *P. aphrodite*  
471 that seems to have four chromosomes (1, 2, 10b, 17) corresponding to the Vanilla chromosome 1.  
472 The comparison of the two Ks histograms of a genome against itself (Supplemental Figure 8B and  
473 7F) indicated the same kind of peak profile but narrower for *P. aphrodite*. Comparison of the  
474 vanilla genome with the genome of other orchids to search for the missing vanilla chromosomes 15  
475 and 16 does not seem to be an appropriate approach because these chromosomes are probably  
476 small, specific and contain few genes. Their absence would therefore not be an obstacle to the study  
477 of the evolution of monocot genomes.

478

## 479 **Supplemental Note 5**

480

### 481 **Detection of non-endoreplicated genomic regions**

482 Reads from each sequencing technology used in this study (HiFi long reads, ONT long reads and  
483 Illumina short reads from CR0040), as well as ONT long reads and Illumina short reads from  
484 *Daphna* were mapped onto the CR0040 assembly. Minimap2 (Li, 2018) was used for long reads  
485 mapping with the following parameters: -a -x asm20 -t8, and Illumina short reads were mapped  
486 using bwa-mem2 (<https://github.com/bwa-mem2/bwa-mem2>) with default parameters. Sequencing  
487 depths were extracted with the samtools depth script for each position. These values were averaged  
488 for genomic windows of 20Kb which were used to compute global statistics on chromosomes and  
489 to plot depth distributions along the 28 chromosomes and the two random mosaic chromosomes

490 (chr0). Mean sequencing depth of the genome was 19.57, 29.82 and 52.50 for CR0040 cultivar with  
491 HiFi, ONT and Illumina reads, and 27.29 and 46.03 for Daphna cultivar with ONT and Illumina  
492 reads. The chromosome 11A is less covered by sequencing due to the presence of large gaps in its  
493 assembly. The sequencing depth of CR0040 genome per technology is summarized in the  
494 Supplemental Table 15.

495 The sequencing depth of CR0040 genome using Daphna data sequences (Hasing et al., 2020) is  
496 summarized in the Supplemental Table 16. The mean sequencing depth of the two random mosaic  
497 chromosomes (chr0) was lower than the one of the 14 pseudochromosomes for long reads  
498 sequencing technologies (Supplemental Tables 15 and 16). To detect sequencing depth bias and to  
499 limit the risk to detect false positives, the mean of sequencing depth for every 20 successive  
500 windows of 20Kb was computed using Illumina reads for Daphna and using long reads (HiFi +  
501 ONT) for CR0040. All regions with a sequencing depth inferior to 20% of mean sequencing depth  
502 of chromosomes were selected for both Daphna and CR0040. Regions with a decrease in  
503 sequencing depth for both cultivars were identified using the 'bedtools intersect' (version 2.29.2)  
504 and correspond to the endoreplication pattern 1. Low coverage regions identified from the HiFi  
505 CR0040 reads mapping that did not overlap with those identified from the Daphna Illumina reads  
506 mapping corresponded to the endoreplication pattern 2. All automatically identified regions were  
507 manually validated and refined by visualization of sequencing depth drops for each CR0040  
508 chromosome and for all available sequencing datasets (Supplemental Figure 9).

509 Supplemental Figure 10 shows low depth k-mers information in addition to the coverage depth  
510 information presented in Supplemental Figure 9. The ratios of k-mers of depth between 5x and 15x  
511 were computed for genomic windows of 20Kb and plotted along each pair of chromosomes.

512

513

## 514 **Supplemental Note 6**

515

### 516 **Database implementation for Vanilla Genome Hub (VGH)**

517 The VGH was constructed using the Tripal v3 framework, a specific toolkit for the construction of  
518 online community genomic databases, by integrating the GMOD Chado database schema and the  
519 Drupal open source platform (<https://www.drupal.org/>). The genome sequences, predicted gene  
520 models, mRNA and protein sequences were loaded into the database using the 'Data Loaders'  
521 function of Tripal. The Drupal theme of the website is derived from the hardwood genomics  
522 website (<https://github.com/statonlab/hardwood>).

523

### 524 **Gene Search**

525 Gene search can be done in two ways, (i) by querying genes using the Tripal MegaSearch module  
526 (Jung, et al, 2021) and various filters such as name, chromosome position and functional annotation  
527 (putative function, InterPro domain and gene ontology, Figure 6B), (ii) by similarity using BLAST.  
528 The BLAST search interface provides access to datasets from the current genome release, allowing  
529 users to conduct sequence searches against the coding sequences, transcripts, proteins and the  
530 whole-genome assembly (Figure 6C).

531 For both, results are displayed as a dynamic table that summarizes the relevant information on the  
532 corresponding search with a link to the gene report and onto the genome browser.

533 Gene report page provides the user with a view of the metadata associated with the gene models.  
534 These include protein domain composition identified by InterProScan, Gene Ontology (GO)  
535 annotations and KEGG BlastKOALA (Figure 6D).

536

### 537 **Genome Browser**

538 Genome visualization was implemented using the Tripal JBrowse module  
539 ([https://github.com/tripal/tripal\\_jbrowse](https://github.com/tripal/tripal_jbrowse)) (Figure 6E). The module embeds JBrowse (Buels et al.,  
540 2016), an interactive, client-side genome browser, into a Drupal webpage. JBrowse allows users to  
541 visualize features of the reference genome. Each chromosome can be selected from a drop-down  
542 menu, and the browser displays information about the sequence and corresponding gene models.  
543 The gene expression profiles are also displayed in JBrowse. To display RNA-Seq expression  
544 profiles in JBrowse, the read alignment file in BAM format for each accession was converted to  
545 coverage tracks in bigwig format using DeepTools2, and these coverage tracks were then loaded  
546 onto JBrowse.

547

### 548 **Metabolic pathway**

549 The Pathologic file previously produced was processed by Pathway Tools, which predicted a total  
550 of 678 metabolic pathways in vanilla. A pathway database, VanillaCyc ([https://vanilla-genome-  
551 hub.cirad.fr/content/pathways-tools](https://vanilla-genome-hub.cirad.fr/content/pathways-tools)), was built based on these predicted pathways using the web  
552 server of Pathway Tools (Figure 6F). Users can search and browse the predicted pathways, as well  
553 as perform comparative and omics data analysis through the VanillaCyc database.

554 If we take the example of the methyltransferase gene family (Enzyme Commission Number 2.1.1.-),  
555 415 methyltransferases were predicted on both haplotypes CR0040\_A and CR0040\_B. The O-  
556 methyltransferase are involved, among other things, in four phenylpropanoid biosynthetic pathways  
557 predicted by Pathway Tools:

558     The phenylpropanoid biosynthesis (PWY-361)

559     The free phenylpropanoid acid biosynthesis (PWY-2181)



560 The vanillin biosynthesis I (PWY-5665)  
561 The phenylpropanoids methylation (ice plant; PWY-7498)  
562 If we focus on the example of two CR0040 methyltransferases:  
563 VANPL\_B\_00007t006130 (OG0000841), the only Caffeic acid O-methyltransferase predicted  
564 in the vanillin biosynthesis I pathway and also putatively involved in the phenylpropanoid  
565 biosynthesis and  
566 VANPL\_B\_00011t00710 (OG0000449), OMT4 (Vpl\_s126Bg26946.1) homolog possibly  
567 involved in the phenylpropanoid biosynthesis and the phenylpropanoids methylation (ice  
568 plant).

569 Phylogenetic trees of the orthogroups of these polypeptides showed clusters of genes encoding for  
570 Caffeic acid O-methyltransferase (COMT, OG0000841; Supplemental Figure 11A, B) and for O-  
571 methyltransferase (OMT, OG0000449; Supplemental Figure 11C, D). The two OrthoFinder gene  
572 families, OG0000449.fa and OG0000841.fa, are available in the VGH (see download section  
573 below). They were reanalyzed with <https://ngphylogeny.fr/> using the PhyML/OneClick workflow  
574 and advanced setting. Default parameters were used except for PhyML. Tree topology search and  
575 branch support option were set to “best of nearest neighbor interchange (NNI) and subtree pruning  
576 and regrafting (SPR)” and approximate likelihood-ratio test, respectively. Gene names are indicated  
577 in blue, green, red, black, magenta and orange for CR0040 *V. planifolia*, *Daphna V. planifolia*,  
578 *Arabidopsis thaliana*, *Oryza sativa* subsp. *japonica* and *Phalaenopsis equestris*, respectively.

579 Regarding these two OrthoFinder orthogroups, we observed that there is a higher number of genes  
580 predicted in the *Daphna* genome than in the CR0040 one and for CR0040, methyltransferases are  
581 preferentially found on haplotype B (Supplemental Figure 11). This could suggest phenomena that  
582 may be concomitant such as variations of the dispensable genome, assembly problems in the two  
583 *Vanilla planifolia* genomes or annotations. Indeed, in both gene families, the *Daphna* haplotype A  
584 appears to contain tandem methyltransferase clusters (green boxes on DA07 and DA11 genomic  
585 regions in JBrowse; Supplemental Figure 11B, D). However, it can be seen in the genomic region  
586 containing a tandem methyltransferase cluster on *Daphna\_A* chromosome 7, that the cluster is  
587 interrupted by genes that are repeated in 5' (grey boxes in the Supplemental Figure 11B): Protein  
588 disulfide-isomerase LQY1, Type I inositol-1,4,5-trisphosphate 5-phosphatase, Pentatricopeptide  
589 repeat-containing protein, Activating signal cointegrator 1. This may reflect the assembly of two  
590 allelic long reads instead of them being separated in each of the two *Daphna* haplotypes. This is  
591 consistent with other remarks already made along these lines in this article (e.g. optical mapping,  
592 syntenic dotplot). As illustrated with these isozyme examples, it is therefore possible that this is the  
593 same reason why the chromosome scaffolded part is larger in *Daphna* than in CR0040 and why the

594 number of paralogs is overestimated in *Daphna* compared to CR0040. On the contrary, the  
595 CR0040\_A chromosomes would possibly underestimate tandem gene clusters.

596

### 597 **GO enrichment analysis**

598 From a list of genes of interest, it can be interesting to look for enriched biological processes,  
599 molecular functions, or cellular components. This functionality is brought by DIANE (Dashboard  
600 for the Inference and Analysis of Networks from Expression data), as described in Cassan, et al  
601 (2021). Results can be obtained as a data table, a dotplot of enriched GO terms with associated gene  
602 counts and p-values, or an enrichment map linking co-occurring GO terms (Figure 6G).

### 603 **Synteny analysis and visualization**

604 Syntenic blocks and homologous gene pairs within syntenic blocks were identified in the two  
605 vanilla genome sequences, including comparisons both within each genome and between any two  
606 genomes (haplotypes). The protein sequences were first aligned against themselves (within each  
607 genome) as well as between each other (pairwise comparisons) using a reciprocal best hit approach.  
608 Based on the BLASTP results and gene positions, syntenic blocks were determined using  
609 MCScanX with default parameters (Wang et al., 2012). To further facilitate comparative analyses of  
610 genomes, the Synvisio extension module (<https://www.drupal.org/project/synvisio>) was  
611 implemented. The module embeds Synvisio (Bandi, 2020), an interactive multiscale synteny  
612 visualization tool for MCScanX, into a Drupal webpage and provides a simple interface for  
613 managing and creating Synvisio instances (Figure 6H). Liftoff (Shumate and Salzberg, 2021) was  
614 used to align the gene sequences of *Daphna* to the CR0040 genome. For each gene, Liftoff finds the  
615 alignments of the exons that maximize sequence identity while preserving the transcript and gene  
616 structure. This track can be loaded onto JBrowse to visualize the collinearity between the 2 sets of  
617 annotations.

618

### 619 **Download section**

620 A download section grants users direct access to the data used by the different tools that compose  
621 the hub. Assembly of pseudomolecules as well as their structural and functional annotations are  
622 available in FASTA and in GFF3 formats respectively at  
623 <https://vanilla-genome-hub.cirad.fr/content/download>. This section was created using the  
624 Filebrowser module (<https://www.drupal.org/project/filebrowser>).

625 **Supplemental References**

626

627 **Bandi, V. K.** (2020). SynVisio: a multiscale tool to explore genomic conservation, Master of  
628 Science (M.Sc.) dissertation, University of Saskatchewan. 82p.

629 **Bory, S., Da Silva, D., Risterucci, A.M., Grisoni, M., Besse, P., and Duval, M.F.** (2008).  
630 Development of microsatellite markers in cultivated vanilla: Polymorphism and transferability to  
631 other vanilla species. *Scientia Horticulturae*, 115, 420-425. 10.1016/j.scienta.2007.10.020.

632 **Bouétard, A., Lefeuvre, P., Gigant, R., Bory, S., Pignal, M., Besse, P., and Grisoni, M.** (2010).  
633 Evidence of transoceanic dispersion of the genus *Vanilla* based on plastid DNA phylogenetic  
634 analysis. *Molecular Phylogenetics and Evolution*, 55(2), 621-630.

635 **Bourge, M., Brown, S. C., and Siljak-Yakovlev, S.** (2018). Flow cytometry as tool in plant  
636 sciences, with emphasis on genome size and ploidy level assessment. *Genetics and Applications*,  
637 2(2), 1-12.

638 **Brown, S.C., Bourge, M., Maunoury, N., Wong, M., Bianchi, M.W., Lepers-Andrzejewski, S.,**  
639 **Besse, P., Siljak-Yakovlev, S., Dron, M., and Satiat-Jeunematre, B.** (2017). DNA remodeling by  
640 strict partial endoreplication in Orchids, an original process in the plant kingdom. *Genome Biology*  
641 *and Evolution*, 9, 1051-1071. 10.1093/gbe/evx063.

642 **Buels, R., Yao, E., Diesh, C. M., Hayes, R. D., Munoz-Torres, M., Helt, G., Goodstein, D. M.,**  
643 **Elsik, C. G., Lewis, S. E., Stein, L., and Holmes, I. H.** (2016). JBrowse: a dynamic web platform  
644 for genome visualization and analysis. *Genome biology*, 17, 66. [https://doi.org/10.1186/s13059-](https://doi.org/10.1186/s13059-016-0924-1)  
645 016-0924-1.

646 **Cassan, O., Lèbre, S. and Martin, A.** (2021). Inferring and analyzing gene regulatory networks  
647 from multi-factorial expression data: a complete and interactive suite. *BMC Genomics* 22, 387.  
648 <https://doi.org/10.1186/s12864-021-07659-2>.

649 **Chao, Y. T., Yen, S. H., Yeh, J. H., Chen, W. C., and Shih, M. C.** (2017). Orchidstra 2.0-A  
650 Transcriptomics Resource for the orchid family. *Plant and cell physiology*, 58(1), e9.  
651 <https://doi.org/10.1093/pcp/pcw220>.

652 **Cheng, H., Concepcion, G. T., Feng, X., Zhang, H., and Li, H.** (2021). Haplotype-resolved de  
653 novo assembly using phased assembly graphs with hifiasm. *Nature methods*, 18(2), 170–175.  
654 <https://doi.org/10.1038/s41592-020-01056-5>.

655 **Claudé-Renard, C., Chevalet, C., Faraut, T., and Kahn, D.** (2003). Enzyme-specific profiles for  
656 genome annotation: PRIAM. *Nucleic acids research*, 31(22), 6633–6639.  
657 <https://doi.org/10.1093/nar/gkg847>.

658 **Conway, J. R., Lex, A., and Gehlenborg, N.** (2017). UpSetR: an R package for the visualization  
659 of intersecting sets and their properties. *Bioinformatics*, 33(18), 2938–2940.  
660 <https://doi.org/10.1093/bioinformatics/btx364>.

661 **Emms, D. M., and Kelly, S.** (2019). OrthoFinder: phylogenetic orthology inference for  
662 comparative genomics. *Genome biology*, 20(1), 238. <https://doi.org/10.1186/s13059-019-1832-y>

663 **Ellinghaus, D., Kurtz, S., and Willhoeft, U.** (2008). LTRharvest, an efficient and flexible software  
664 for de novo detection of LTR retrotransposons. *BMC bioinformatics*, 9, 18.  
665 <https://doi.org/10.1186/1471-2105-9-18>.

666 **Favre, F., Jourda, C., Grisoni, M., Rivallan, R., Dijoux, J. B., Hascoat, J., Lepers, S., Besse, P.,  
667 and Charron, C.** (2022) A genome-wide assessment of the genetic diversity, evolution and  
668 relationships with allied species of the clonally propagated crop *Vanilla planifolia*. *Genetic  
669 Resources and Crop Evolution*, in press. <https://doi.org/10.1007/s10722-022-01362-1>.

670 **Flynn JM, Hubley R, Goubert C, Rosen, J., Clark, A. G., Feschotte, C., and Smit, A. F.** (2020)  
671 RepeatModeler2 for automated genomic discovery of transposable element families. *Proceedings of  
672 the National Academy of Sciences of the United States of America*, 117(17):9451-9457.  
673 [doi:10.1073/pnas.1921046117](https://doi.org/10.1073/pnas.1921046117).

674 **Fu, L., Niu, B., Zhu, Z., Wu, S., and Li, W.** (2012). CD-HIT: accelerated for clustering the next-  
675 generation sequencing data. *Bioinformatics*, 28(23), 3150–3152.  
676 <https://doi.org/10.1093/bioinformatics/bts565>.

677 **Girgis H. Z.** (2015). Red: an intelligent, rapid, accurate tool for detecting repeats de-novo on the  
678 genomic scale. *BMC bioinformatics*, 16, 227. <https://doi.org/10.1186/s12859-015-0654-5>.

679 **Gurevich, A., Saveliev, V., Vyahhi, N., and Tesler, G.** (2013). QUASt: quality assessment tool  
680 for genome assemblies. *Bioinformatics*, 29(8), 1072–1075.  
681 <https://doi.org/10.1093/bioinformatics/btt086>.

682 **Haas BJ, Delcher AL, Wortman JR and Salzberg SL.** (2004) DAGchainer: a tool for mining  
683 segmental genome duplications and synteny. *Bioinformatics*. 20(18):3643-3646.  
684 [doi:10.1093/bioinformatics/bth397](https://doi.org/10.1093/bioinformatics/bth397).

685 **Hasing, T., Tang, H.B., Brym, M., Khazi, F., Huang, T.F., and Chambers, A.H.** (2020). A  
686 phased *Vanilla planifolia* genome enables genetic improvement of flavour and production. *Nature  
687 Food* 1:811-819. [10.1038/s43016-020-00197-2](https://doi.org/10.1038/s43016-020-00197-2).

688 **Haug-Baltzell, A., Stephens, S. A., Davey, S., Scheidegger, C. E., and Lyons, E.** (2017).  
689 SynMap2 and SynMap3D: web-based whole-genome synteny browsers. *Bioinformatics*, 33(14),  
690 2197–2198. <https://doi.org/10.1093/bioinformatics/btx144>.

691 **Hoede, C., Arnoux, S., Moisset, M., Chaumier, T., Inizan, O., Jamilloux, V., and Quesneville,**  
692 **H.** (2014). PASTEC: an automatic transposable element classification tool. *PloS one*, 9(5), e91929.  
693 <https://doi.org/10.1371/journal.pone.0091929>.

694 **Jiao, Y.N., Li, J.P., Tang, H.B., and Paterson, A.H.** (2014). Integrated syntenic and  
695 phylogenomic analyses reveal an ancient genome duplication in monocots. *Plant Cell* 26:2792-  
696 2802. [10.1105/tpc.114.127597](https://doi.org/10.1105/tpc.114.127597).

697 **Jones, P., Binns, D., Chang, H. Y., Fraser, M., Li, W., McAnulla, C., McWilliam, H., Maslen,**  
698 **J., Mitchell, A., Nuka, G., Pesseat, S., Quinn, A. F., Sangrador-Vegas, A., Scheremetjew, M.,**  
699 **Yong, S. Y., Lopez, R., and Hunter, S.** (2014). InterProScan 5: genome-scale protein function  
700 classification. *Bioinformatics*, 30(9), 1236–1240. <https://doi.org/10.1093/bioinformatics/btu031>.

701 **Jung, S., Cheng, C. H., Buble, K., Lee, T., Humann, J., Yu, J., Crabb, J., Hough, H. and Main,**  
702 **D.** (2021) Tripal MegaSearch: a tool for interactive and customizable query and download of big  
703 data. *Database*. doi: [10.1093/database/baab023](https://doi.org/10.1093/database/baab023).

704 **Kanehisa, M., Sato, Y., and Morishima, K.** (2016). BlastKOALA and GhostKOALA: KEGG  
705 tools for functional characterization of genome and metagenome sequences. *Journal of molecular*  
706 *biology*, 428(4), 726–731. <https://doi.org/10.1016/j.jmb.2015.11.006>.

707 **Karp, P. D., Paley, S., and Romero, P.** (2002). The Pathway Tools software. *Bioinformatics*, 18,  
708 S225–S232. [https://doi.org/10.1093/bioinformatics/18.suppl\\_1.s225](https://doi.org/10.1093/bioinformatics/18.suppl_1.s225).

709 **Kim, D., Paggi, J. M., Park, C., Bennett, C., and Salzberg, S. L.** (2019). Graph-based genome  
710 alignment and genotyping with HISAT2 and HISAT-genotype. *Nature biotechnology*, 37(8), 907–  
711 915. <https://doi.org/10.1038/s41587-019-0201-4>.

712 **Kolmogorov, M., Yuan, J., Lin, Y. and Pevzner, P.A.** (2019) Assembly of long, error-prone  
713 reads using repeat graphs. *Nature Biotechnology*, 37:540.

714 **Kumar, S., Stecher, G., Suleski, M. and Hedges, SB.** (2017) TimeTree: A Resource for  
715 Timelines, Timetrees, and Divergence Times. *Mol Biol Evol* doi:10.1093/molbev/msx116.

716 **Lamesch, P., Berardini, TZ., Li, D., Swarbreck, D., Wilks, C., Sasidharan, R., Muller, R.,**  
717 **Dreher, K., Alexander, DL., Garcia-Hernandez, M., Karthikeyan, AS., Lee, CH., Nelson,**  
718 **WD., Ploetz, L., Singh, S., Wensel, A. and Huala, E.** (2012) The Arabidopsis Information  
719 Resource (TAIR): improved gene annotation and new tools. *Nucleic acids research*. 40 Database  
720 issue D1202-10.

721 **Li, H.** (2018). Minimap2: pairwise alignment for nucleotide sequences. *Bioinformatics*, 34(18),  
722 3094-3100.

723 **Lyons, E. and Freeling, M.** (2008) How to usefully compare homologous plant genes and  
724 chromosomes as DNA sequences. *The Plant Journal* 53 (4), 661-673.

725 **Martin, J., and Hesemann, C. U.** (1988). Cytogenetic investigations in wheat, rye and triticale. I.  
726 Evaluation of improved Giemsa C-and fluorochrome banding techniques in rye chromosomes.  
727 *Heredity*, 61(3), 459-467.

728 **Mendes, F. K., Vanderpool, D., Fulton, B., and Hahn, M. W.** (2020). CAFE 5 models variation  
729 in evolutionary rates among gene families. *Bioinformatics*, btaa1022. Advance online publication.  
730 <https://doi.org/10.1093/bioinformatics/btaa1022>.

731 **Perez-Silva, A., Odoux, E., Brat, P., Ribeyre, F., Rodriguez-Jimenes, G., Robles-Olvera, V.,**  
732 **Garcia-Alvarado, M.A., and Gunata, Z.** (2006). GC-MS and GC-olfactometry analysis of aroma  
733 compounds in a representative organic aroma extract from cured vanilla (*Vanilla planifolia* G.  
734 Jackson) beans. *Food chemistry*, 99:728-735. 10.1016/j.foodchem.2005.08.050.

735 **Pertea, M., Pertea, G. M., Antonescu, C. M., Chang, T. C., Mendell, J. T., and Salzberg, S. L.**  
736 (2015). StringTie enables improved reconstruction of a transcriptome from RNA-seq reads. *Nature*  
737 *biotechnology*, 33(3), 290–295. <https://doi.org/10.1038/nbt.3122>.

738 **Price, A. L., Jones, N. C., and Pevzner, P. A.** (2005). *De novo* identification of repeat families in  
739 large genomes. *Bioinformatics*, 21, i351–i358. <https://doi.org/10.1093/bioinformatics/bti1018>.

740 **Quinlan, A. R., and Hall, I. M.** (2010). BEDTools: a flexible suite of utilities for comparing  
741 genomic features. *Bioinformatics*, 26(6), 841–842. <https://doi.org/10.1093/bioinformatics/btq033>.

742 **Sallet, E., Gouzy, J., and Schiex, T.** (2019). EuGene: An automated integrative gene finder for  
743 Eukaryotes and Prokaryotes. *Methods in molecular biology* (Clifton, N.J.), 1962, 97–120.  
744 [https://doi.org/10.1007/978-1-4939-9173-0\\_6](https://doi.org/10.1007/978-1-4939-9173-0_6).

745 **Sandler, G., Bartkowska, M., Agrawal, A.F., and Wright, S.I.** (2020). Estimation of the SNP  
746 mutation rate in two vegetatively propagating species of duckweed. *G3-Genes Genomes Genetics*  
747 10:4191-4200. 10.1534/g3.120.401704.

748 **Schweizer, D.** (1976). Reverse fluorescent chromosome banding with chromomycin and DAPI.  
749 *Chromosoma*, 58(4), 307-324.

750 **Shumate, A., and Salzberg, S. L.** (2021). Liftoff: accurate mapping of gene annotations,  
751 *Bioinformatics*, 37, 1639–1643, <https://doi.org/10.1093/bioinformatics/btaa1016>.

752 **Siljak-Yakovlev, S., Cerbah, M., Coulaud, J., Stoian, V., Brown, S. C., Zoldos, V., Jelenic, S.,**  
753 **and Papes, D.** (2002). Nuclear DNA content, base composition, heterochromatin and rDNA in  
754 *Picea omorika* and *Picea abies*. *Theoretical and Applied Genetics*, 104(2), 505-512.

755 **Solano-De la Cruz, M.T., Adame-García, J., Gregorio-Jorge, J., Jiménez-Jacinto, V., Vega-**  
756 **Alvarado, L., Iglesias-Andreu, L. G., Escobar-Hernández, E. E., and Luna-Rodríguez, M.**  
757 (2019) Functional categorization of *de novo* transcriptome assembly of *Vanilla planifolia* Jacks.  
758 potentially points to a translational regulation during early stages of infection by *Fusarium*  
759 *oxysporum* f. sp. *vanillae*. *BMC Genomics*, 20(1):826. PMID: 31703622.

760 **Tang, H., Bowers, J. E., Wang, X., and Paterson, A. H.** (2010). Angiosperm genome  
761 comparisons reveal early polyploidy in the monocot lineage. *Proceedings of the National Academy*  
762 *of Sciences of the United States of America*, 107(1), 472–477.  
763 <https://doi.org/10.1073/pnas.0908007107>.

764 **Tarailo-Graovac, M., and Chen, N.** (2009). Using RepeatMasker to identify repetitive elements in  
765 genomic sequences. *Current protocols in bioinformatics*,  
766 <https://doi.org/10.1002/0471250953.bi0410s25>.

767 **Walker, B.J., Abeel, T., Shea, T., Priest, M., Abouelliel, A., Sakthikumar, S., Cuomo, C.A.,**  
768 **Zeng, Q., Wortman, J., 1 Young, S.K. and Earl, A.M.** (2014) Pilon: an integrated tool for  
769 comprehensive microbial variant detection and genome assembly improvement. *PLoS One*,  
770 9:e112963. doi: 10.1371/journal.pone.0112963.

771 **Wang, Y., Tang, H., Debarry, J.D., Tan, X., Li, J., Wang, X., Lee, T.H., Jin, H., Marler, B.,**  
772 **Guo, H., Kissinger, J.C. and Paterson, A.H.** (2012) MCScanX: a toolkit for detection and  
773 evolutionary analysis of gene synteny and collinearity. *Nucleic Acids Research*, 40(7):e49. doi:  
774 10.1093/nar/gkr1293.

775 **Weisenfeld, N. I., Kumar, V., Shah, P., Church, D. M., and Jaffe, D. B.** (2017). Direct  
776 determination of diploid genome sequences. *Genome research*, 27(5), 757-767.

777 **Wicker, T., Sabot, F., Hua-Van, A., Bennetzen, J. L., Capy, P., Chalhoub, B., Flavell, A.,**  
778 **Leroy, P., Morgante, M., Panaud, O., Paux, E., SanMiguel, P., and Schulman, A. H.** (2007). A  
779 unified classification system for eukaryotic transposable elements. *Nature reviews. Genetics*, 8(12),  
780 973–982. <https://doi.org/10.1038/nrg2165>.

781 **Yang, Z.** (2007) PAML 4: phylogenetic analysis by maximum likelihood. *Molecular Biology and*  
782 *Evolution*, 24(8):1586-1591. doi:10.1093/molbev/msm088.

# 1 Supplemental figures

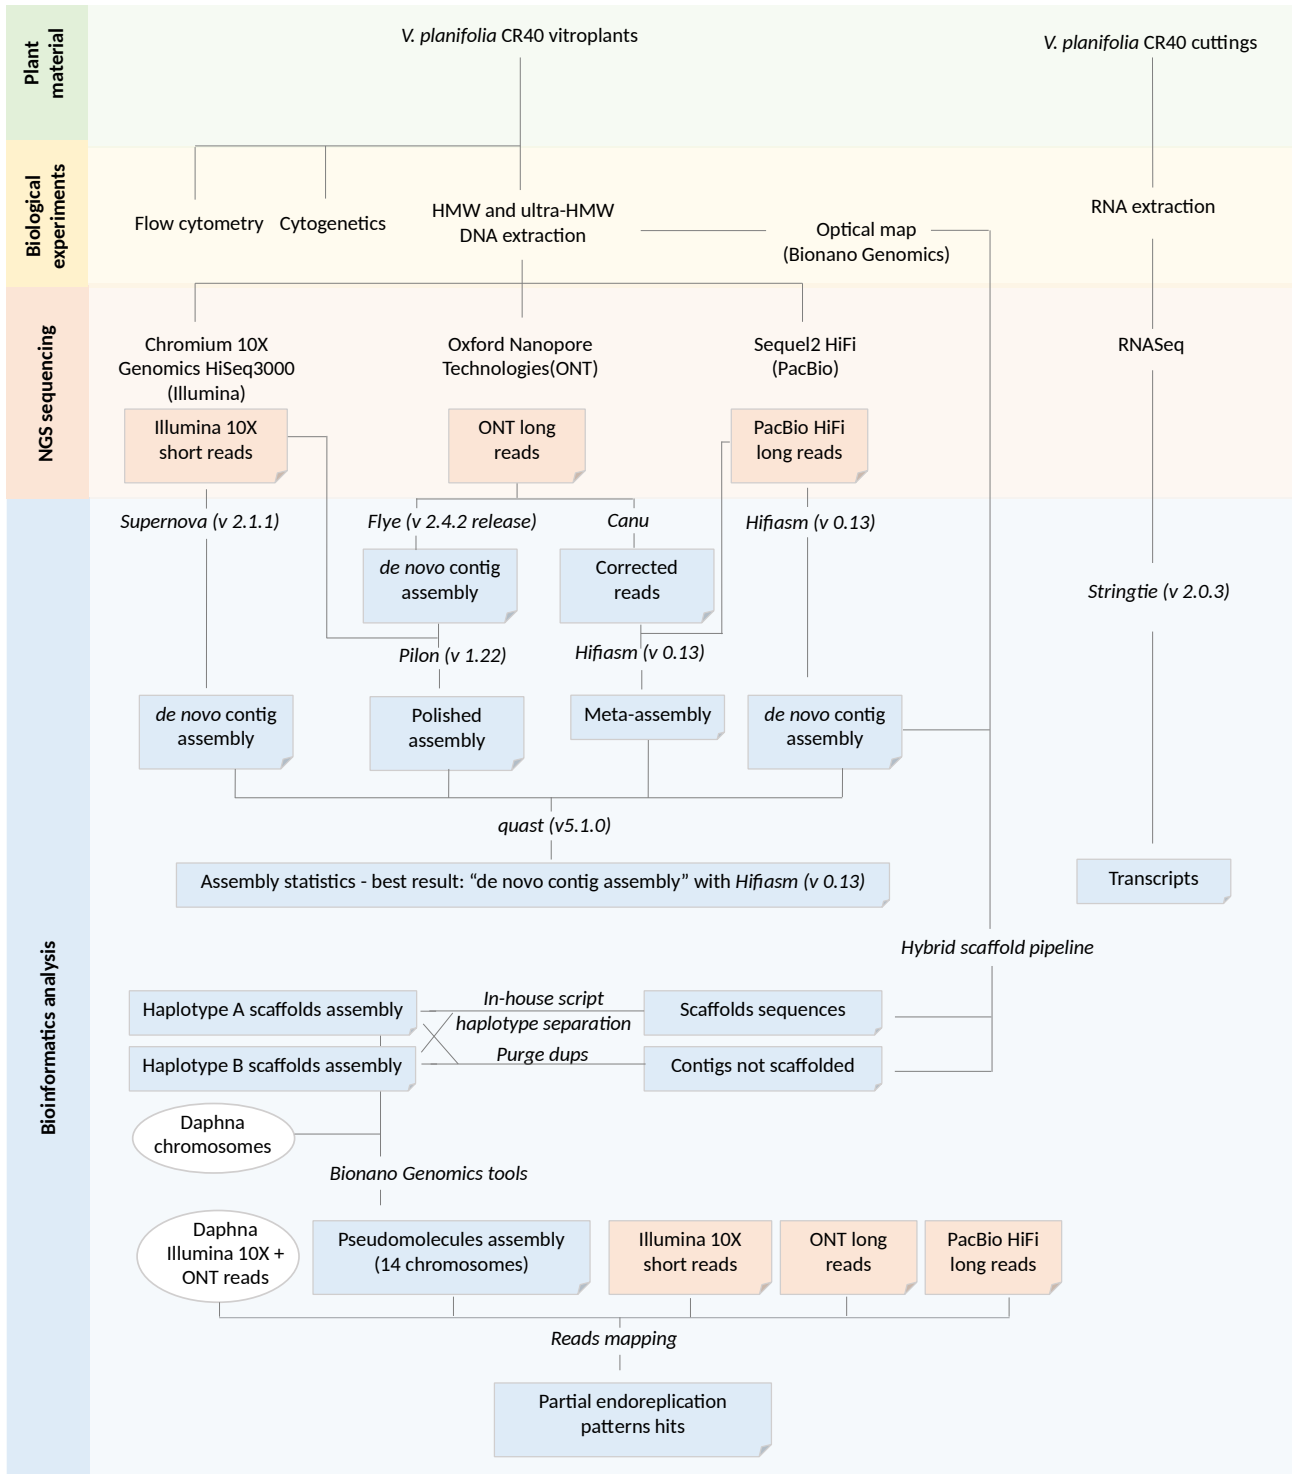

2  
3 Supplemental Figure 1 Schematic representation of CR0040 genome sequencing strategy. Data  
4 represented with white circles were retrieved from *V. planifolia* Daphna genome (Hasing et al,  
5 2020).



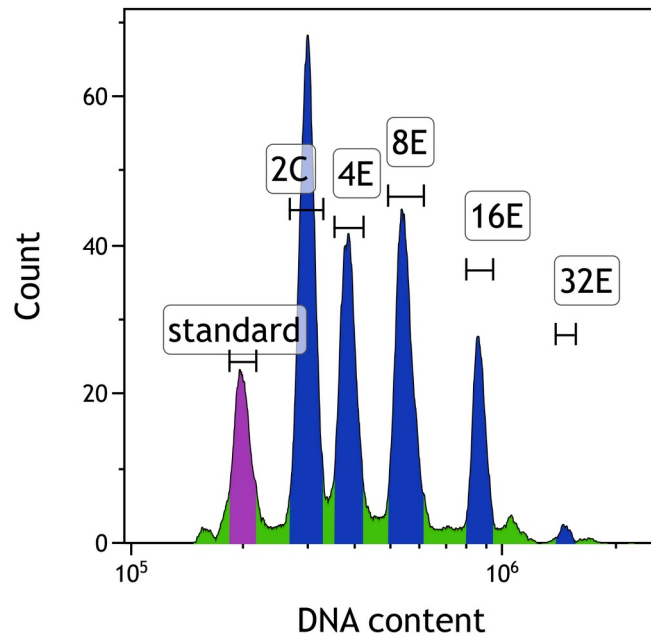

6 Supplemental Figure 2 Example of DNA content histogram of nodal tissue from *Vanilla planifolia*  
7 CR0040.

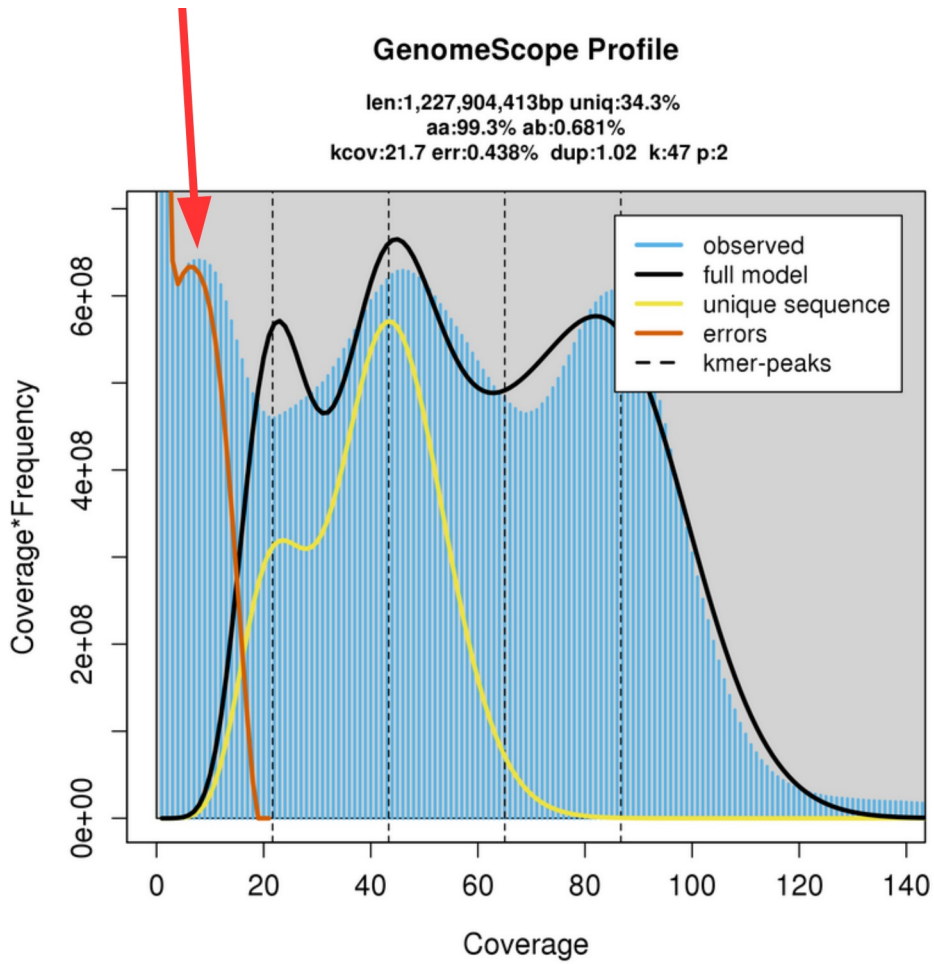

8 Supplemental Figure 3 GenomeScope2 k-mer profile of the CR0040 genome assembly  
9 The red arrow shows k-mers from the non-endoreplicated part of the CR0040 genome whose  
10 distribution is centered at 10X. The two k-mers distributions centered at 42X and 84X, represent the  
11 classical diploid distribution with the heterozygous and homozygous k-mer content.

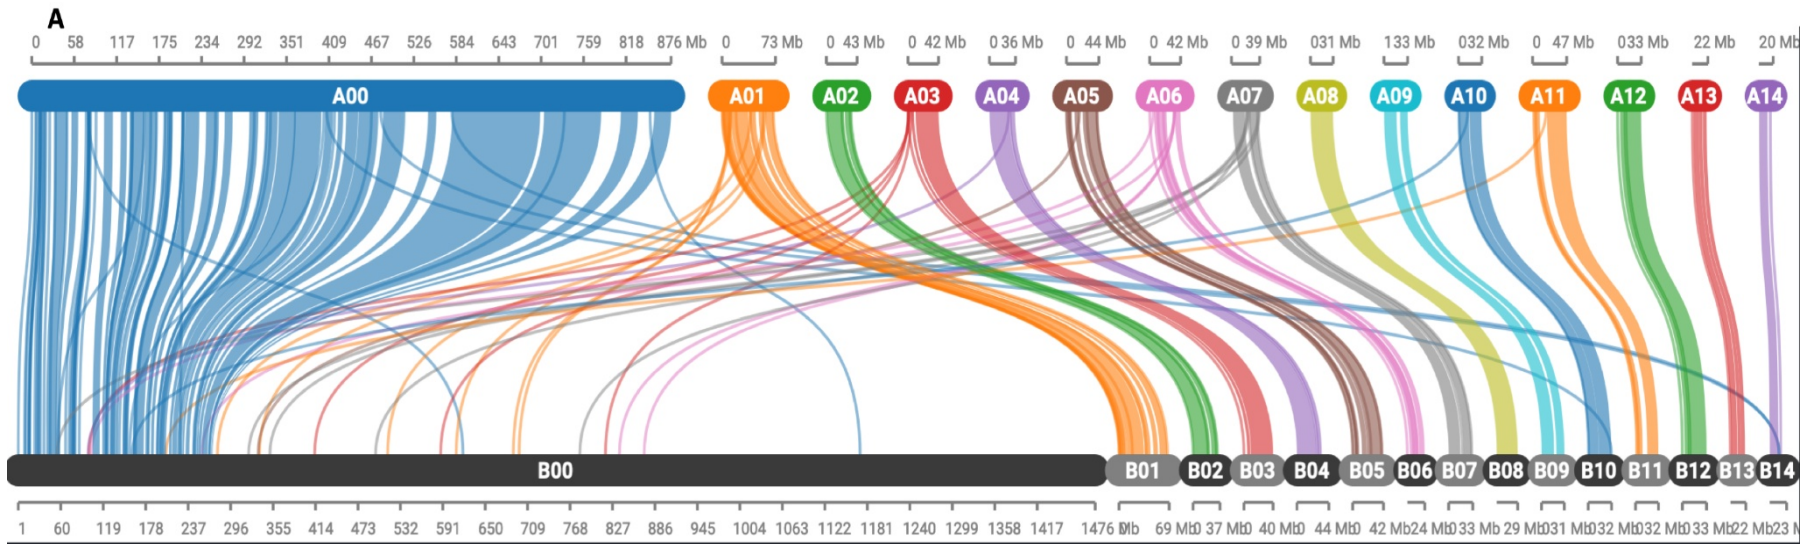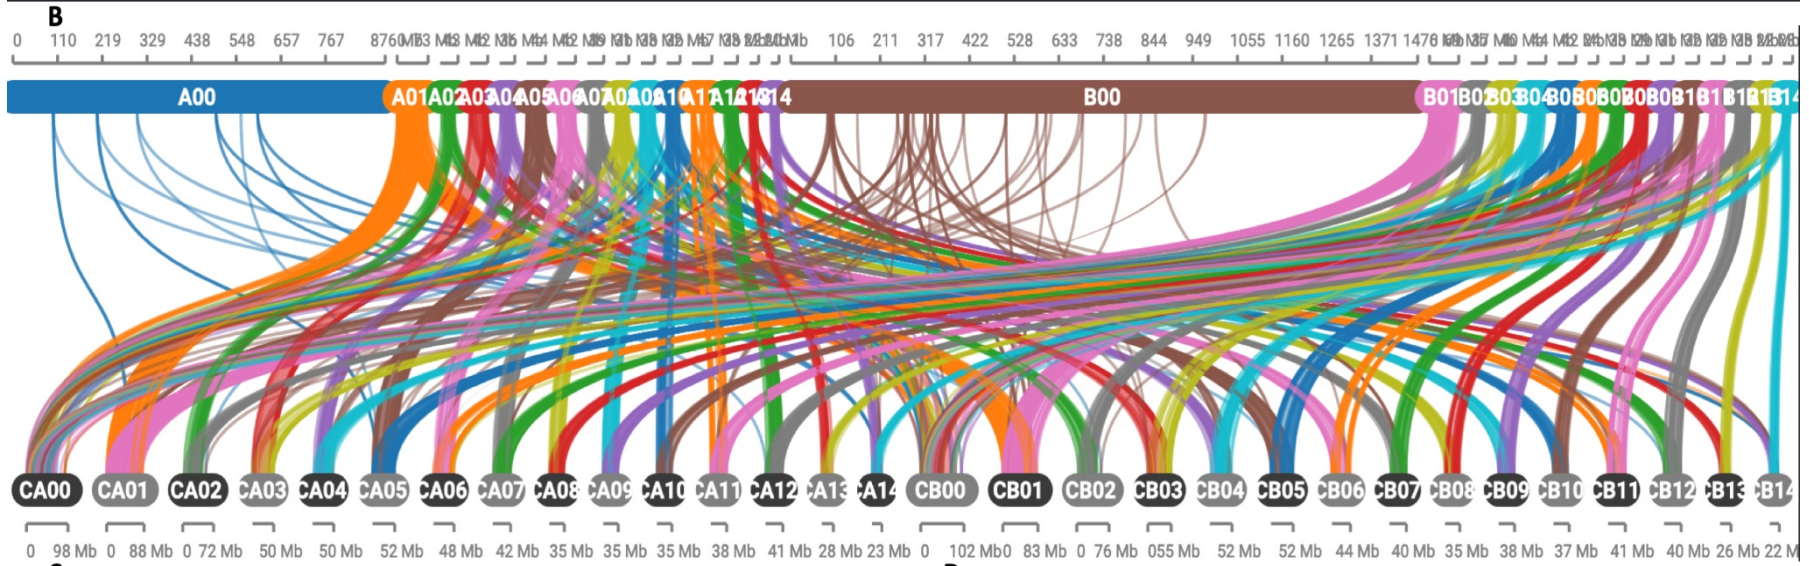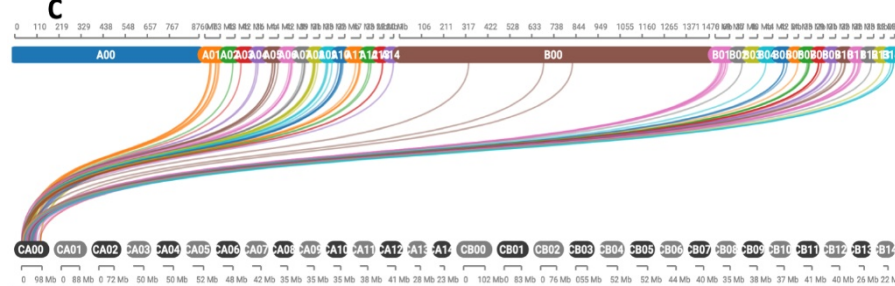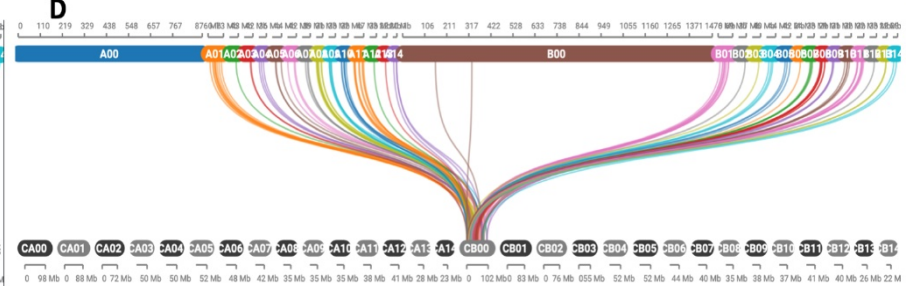

13 Supplemental Figure 4 Synteny view of the two *V. planifolia* genomes.

14 A. Comparison of MCSScanX allelic blocks of both CR0040 haplotypes A and B. B) Comparison of MCSScanX allelic blocks of both CR0040  
15 haplotypes and of both Daphna haplotypes. C) Same as B) but it only shows syntenic relationships between the unknown random pseudomolecule of  
16 Daphna haplotype A (A0) and the CR0040 pseudomolecules in order to pinpoint improvement of CR0040 scaffolding. D) same as C) but with Daphna  
17 B0. Screenshots were done from <https://vanilla-genome-hub.cirad.fr/synvisio>.

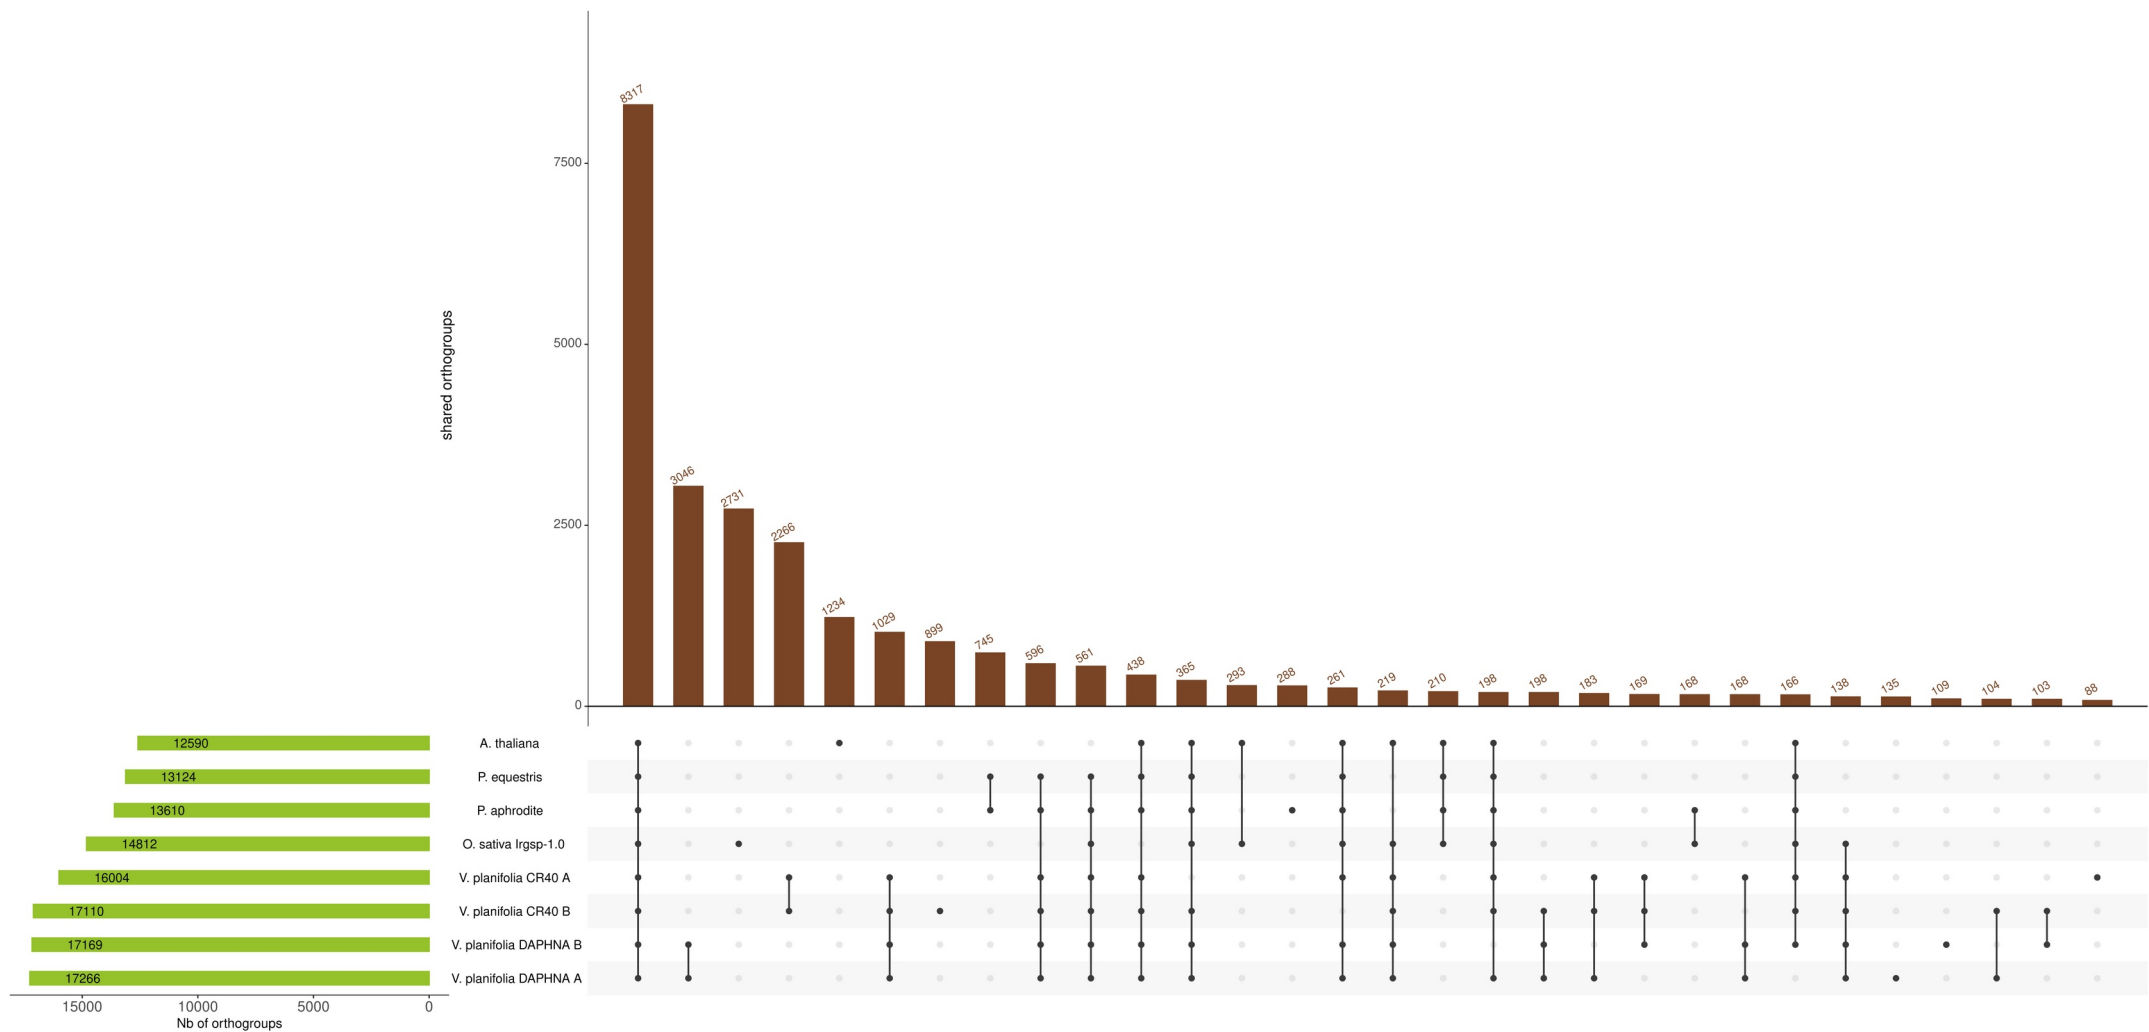

18 Supplemental Figure 5 UpSet plot of the inferred orthogroups.

19 The number of orthogroups identified with OrthoFinder for each species and *V. planifolia* haplotype is displayed inside horizontal green bars. Numbers  
 20 above vertical brown bars represent numbers of orthogroups shared by a given intersection of species/haplotypes illustrated downside each vertical bar.  
 21 For clarity reasons, only the 30 most frequent intersections were displayed on the plot (Nb, numbers).

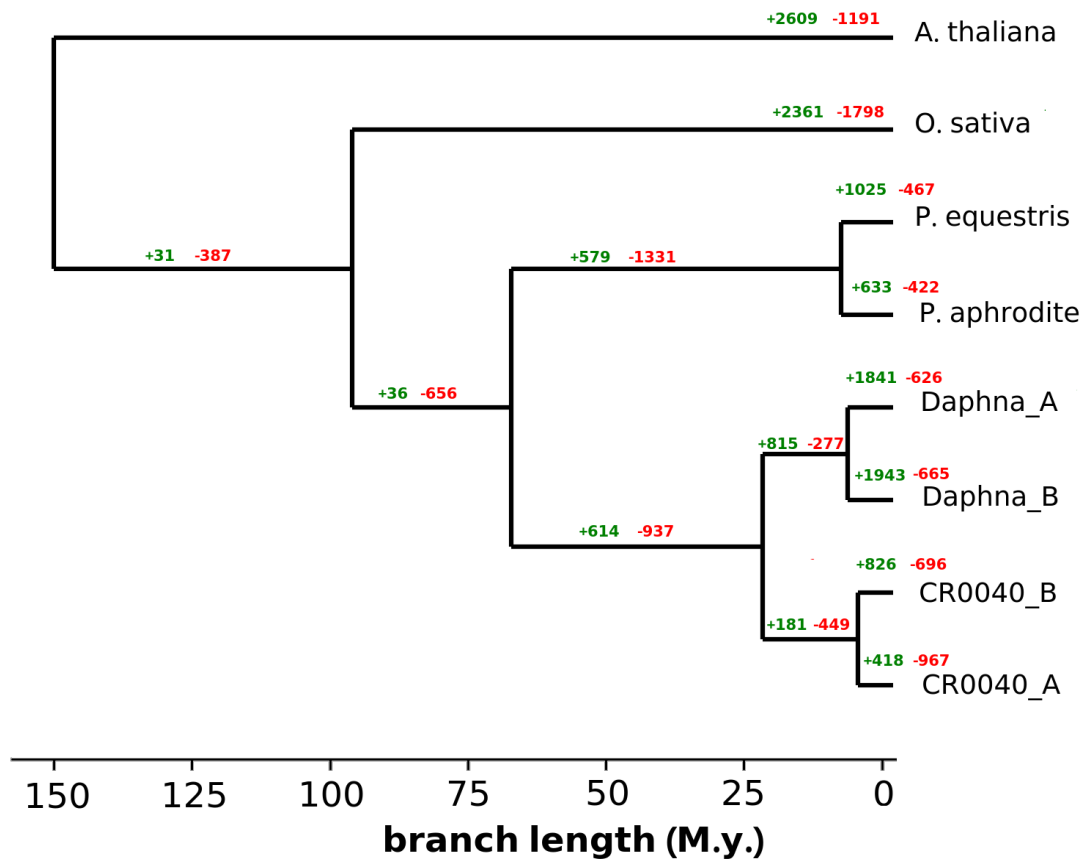

- 22 Supplemental Figure 6 Expansion and reduction of gene families in six proteomes.
- 23 Orthogroups from OrthoFinder on six proteomes (CR0040\_A, CR0040\_A, Daphna\_A,
- 24 *Phalaenopsis equestris*, *P. aphrodite*, *Arabidopsis thaliana*, *Oryza sativa*) were analyzed with
- 25 CAFE. The values represent the number of genes gained/lost.

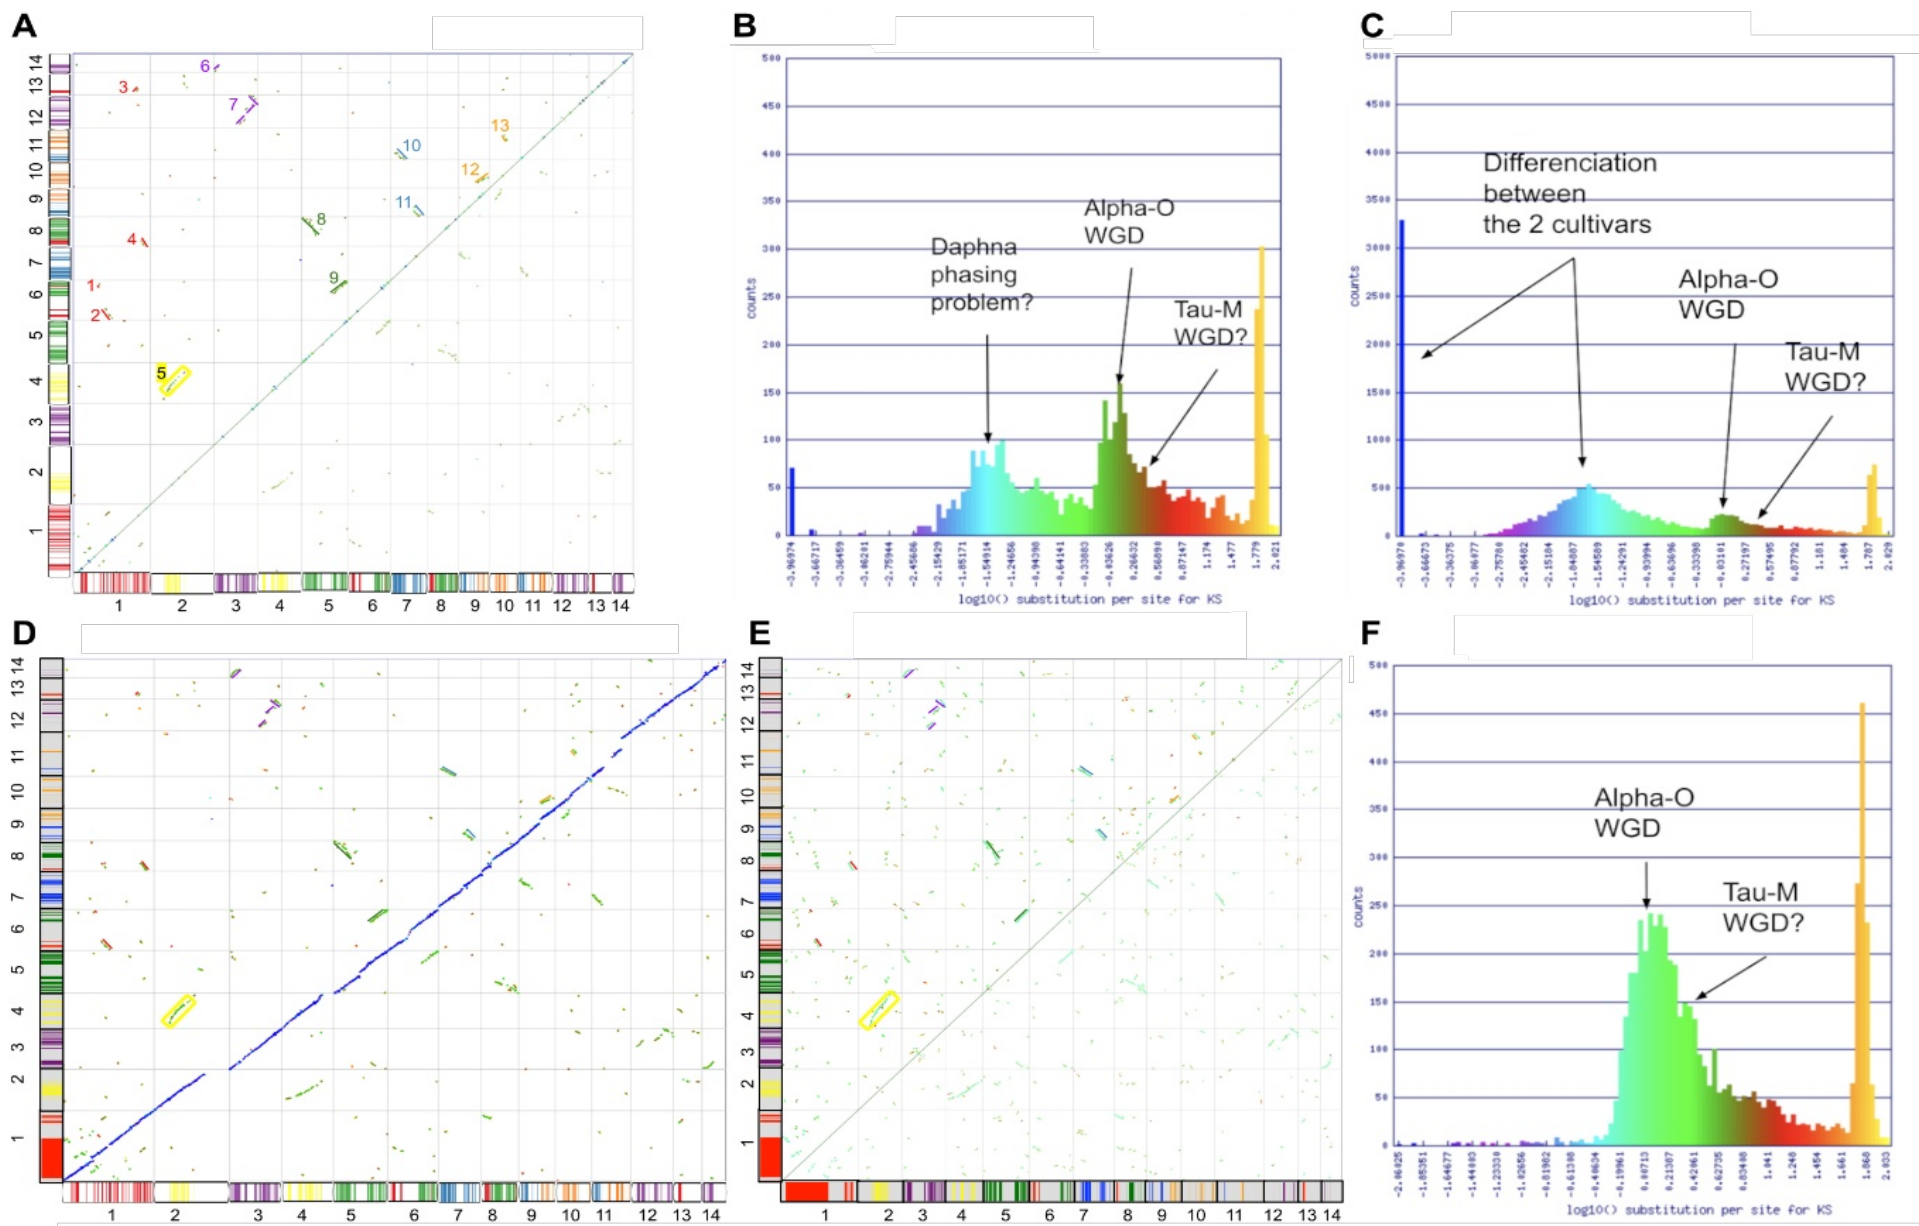

27 Supplemental Figure 7 Synmap pairwise genome synteny analyses between CR0040 and *Daphna* cultivars and between themselves.  
28 Haplotype A syntenic comparisons of *Daphna* CDS against themselves (A, B, see details in <https://genomeevolution.org/r/1jei9>), between  
29 CR0040 and *Daphna* cultivars (C, D, see details in <https://genomeevolution.org/r/1jeid>) and of CR0040 against itself (E, F, see details in  
30 <https://genomeevolution.org/r/1j9ym>) were visualized with dotplots (A, D, E) and histograms of Ks values (B, C, F). *Daphna* karyotype painted  
31 according six pairs of duplicated regions illustrating the pan-orchid  $\alpha^o$  WGD of Figure 4 (Hasing et al., 2020) has been cut out and positioned  
32 below the corresponding chromosomes of the dotplots (A, D). 13 paralog blocks were then projected onto the diagonals. Furthermore, using  
33 reciprocal best hits, the *Daphna* karyotype could be transferred to CR0040 (D, E).



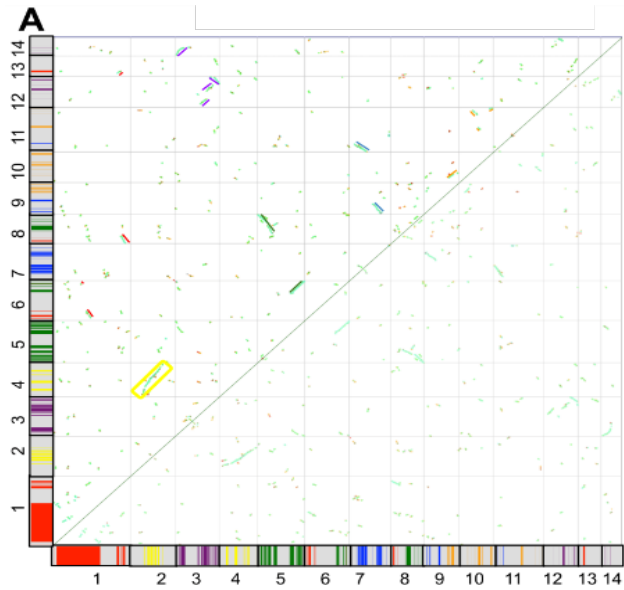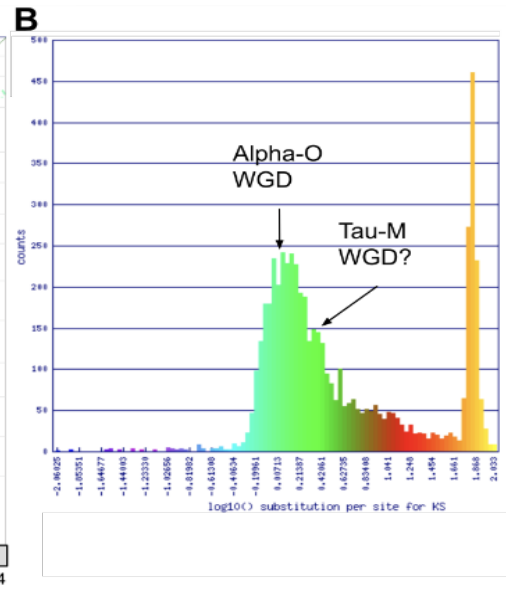

**D**

|      |               |
|------|---------------|
| L01  | VANPL_A_00001 |
| L02  | VANPL_A_00001 |
| L03  | VANPL_A_00003 |
| L04  | VANPL_A_00007 |
| L05a | VANPL_A_00003 |
| L05b | VANPL_A_00003 |
| L06  | VANPL_A_00003 |
| L07  | VANPL_A_00013 |
| L08a | VANPL_A_00002 |
| L08b | VANPL_A_00008 |
| L09  | VANPL_A_00007 |
| L10a | VANPL_A_00013 |
| L10b | VANPL_A_00001 |
| L11  | VANPL_A_00009 |
| L12  | VANPL_A_00011 |
| L13  | VANPL_A_00001 |
| L14  | VANPL_A_00001 |
| L15  | VANPL_A_00008 |
| L16  | VANPL_A_00003 |
| L17  | VANPL_A_00001 |
| L18  | VANPL_A_00005 |
| L19  | VANPL_A_00012 |

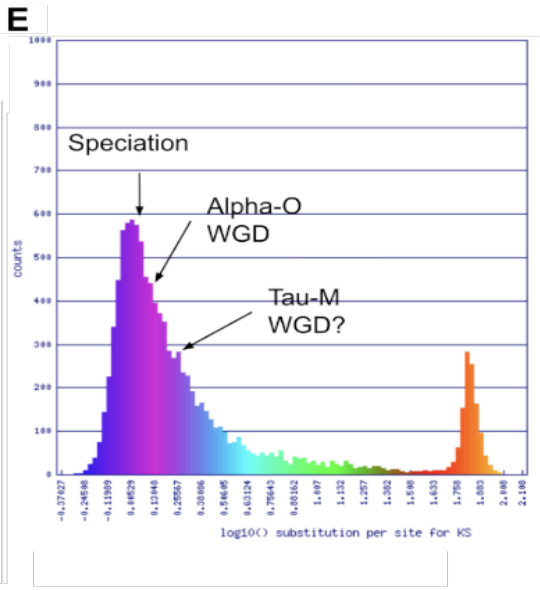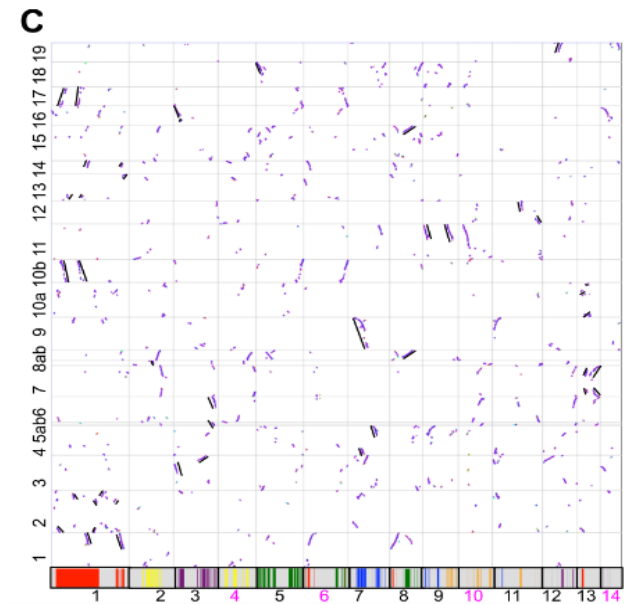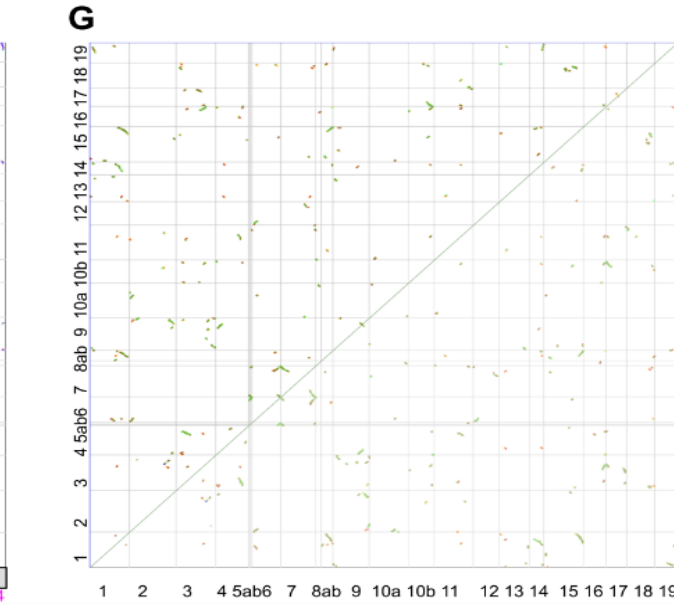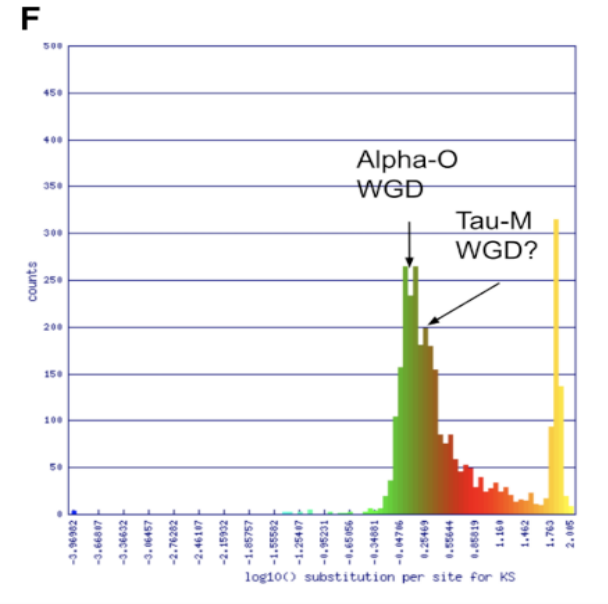

35 Supplemental Figure 8 Synmap pairwise genome synteny analyses between CR0040 *V. planifolia* and *P. aphrodite* and between themselves.  
36 Haplotype A syntenic comparisons of CR0040 CDS against themselves (A, B, see details in <https://genomeevolution.org/r/1j9ym>), between  
37 CR0040 and *P. aphrodite* genome (C, D, E, see details in <https://genomeevolution.org/r/1jekr>) and *P. aphrodite* genome itself (G, F, see details in  
38 <https://genomeevolution.org/r/1jekt>) were visualized with dotplots (A, C, G), histograms of Ks values (B, E, F) and correspondence between the  
39 chromosomes of the two species was indicated according to Syntenic Path Assembly (D; SPA option; <https://genomeevolution.org/r/1jjmm>). The  
40 CR0040 karyotype comes from the transfer of that of *Daphna* (Hasing et al., 2020) using reciprocal best hits. It has been cut out and positioned  
41 below the corresponding chromosomes of dotplots (A, C). Thus, six pairs of duplicated regions illustrating the pan-orchid  $\alpha^o$  WGD allowed to  
42 project paralog blocks onto the diagonals (A). The orthologous blocks between CR0040 and *P. aphrodite* were highlighted with black lines (C)  
43 according to SPA results (D).

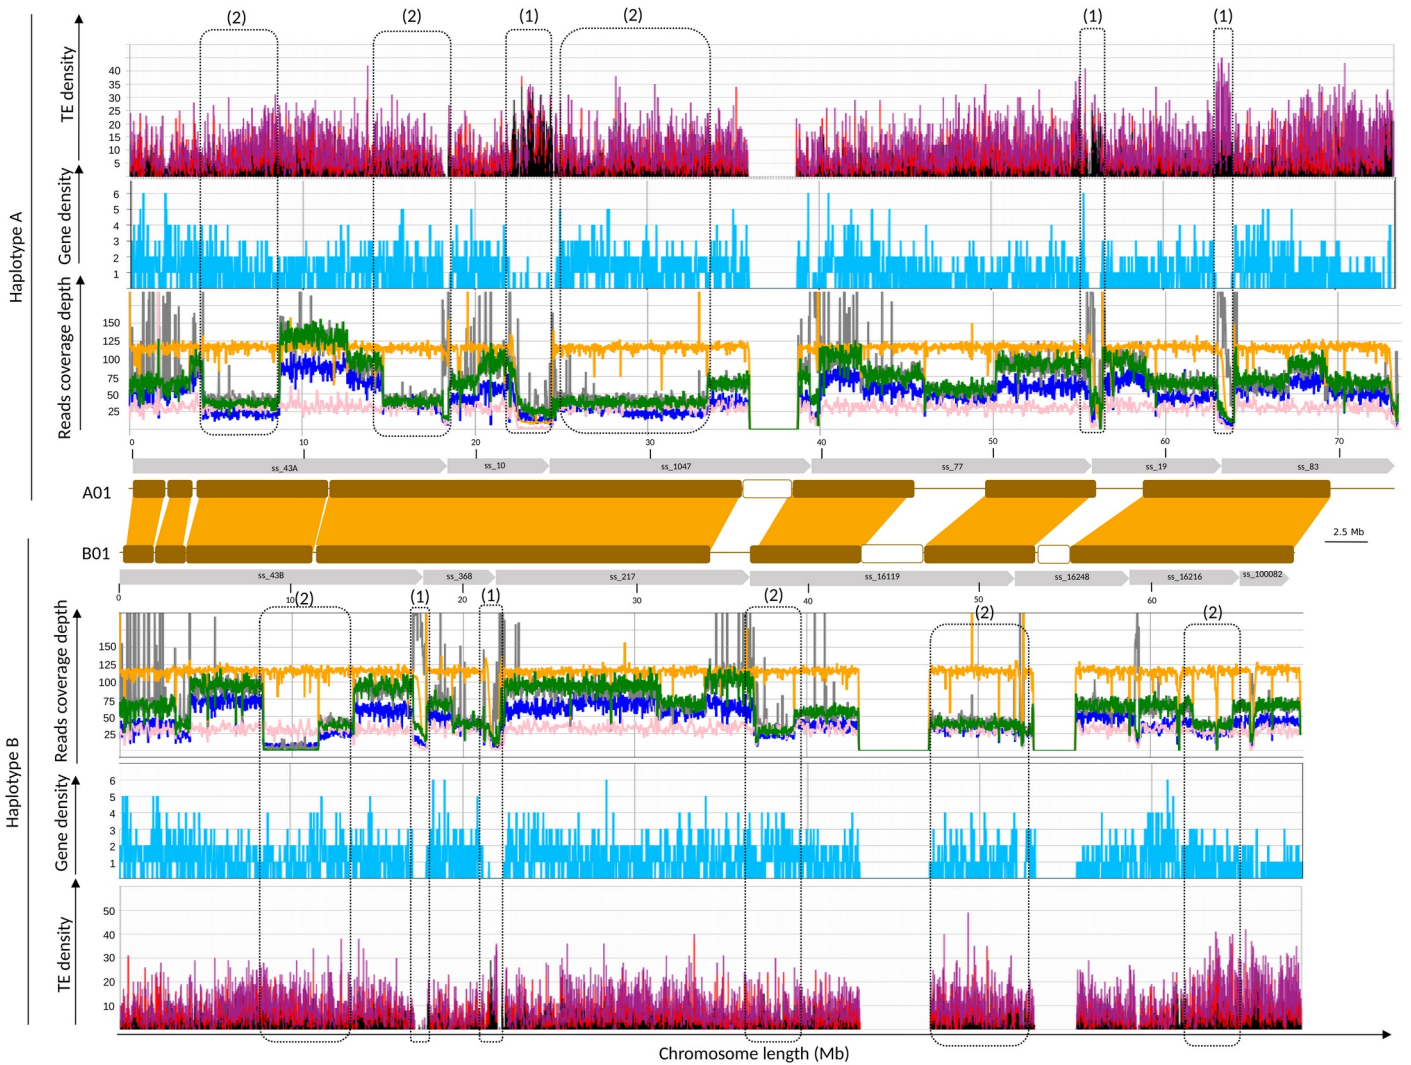

44 Supplemental Figure 9 Sequencing depth along the CR0040 chromosomes obtained by  
 45 mapping Daphna Illumina (yellow) and ONT (pink) reads, CR0040 PacBio Hifi (blue),  
 46 Nanopore (green) and Illumina (grey) reads on the CR0040 assembly. Synteny between  
 47 homologous chromosomes are represented by central boxes. Gaps (N stretches) explaining  
 48 sudden drops in sequencing depth are shown with white blocks. (1) Pattern 1 corresponds to  
 49 low level of sequencing depth for all data. (2) Pattern 2 corresponds to inverted level of  
 50 sequencing depth for CR0040 between haplotypes A and B, and constant level of sequencing  
 51 depth for both Daphna haplotypes. Gene and retrotransposons distributions along the  
 52 chromosomes are represented by a blue line chart and a stacked histogram (copia: red, gypsy:  
 53 purple, other retrotransposons: black) respectively.

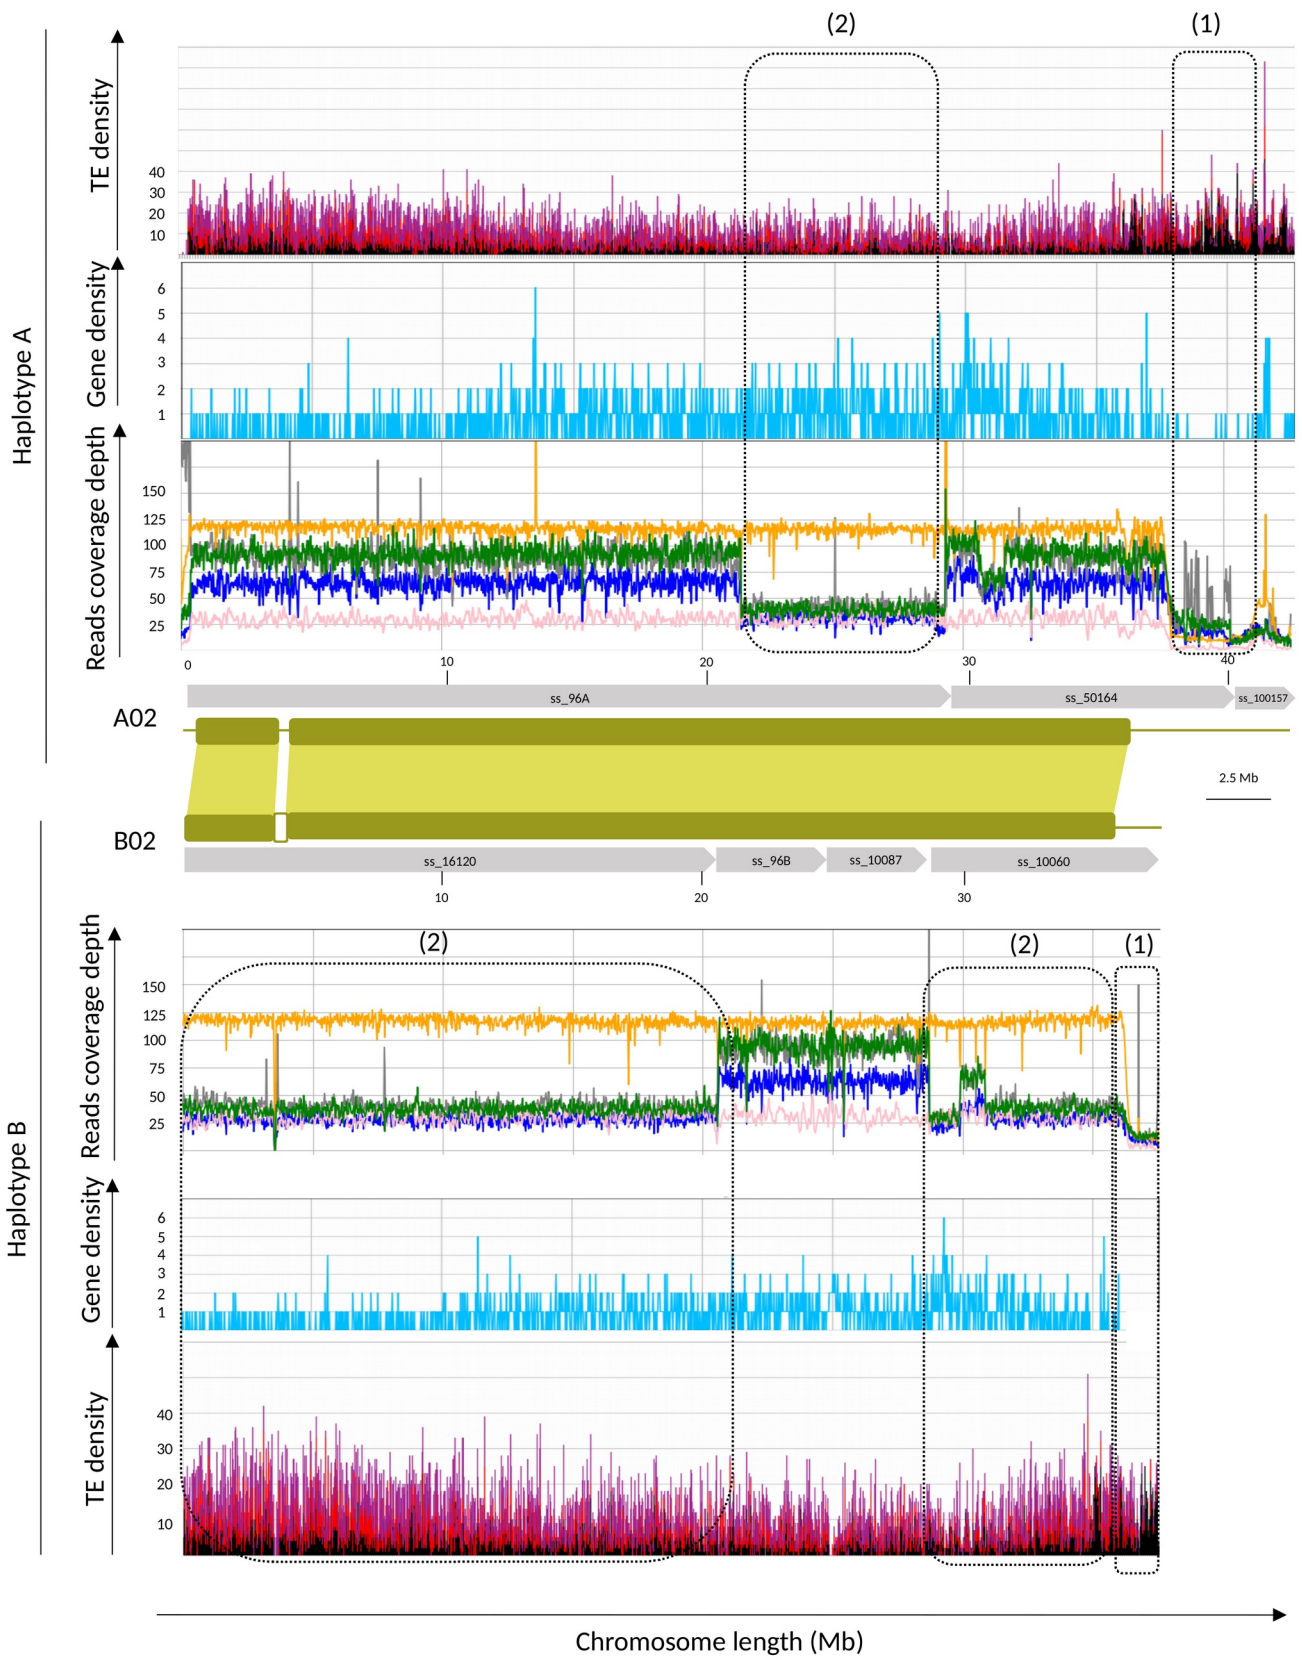

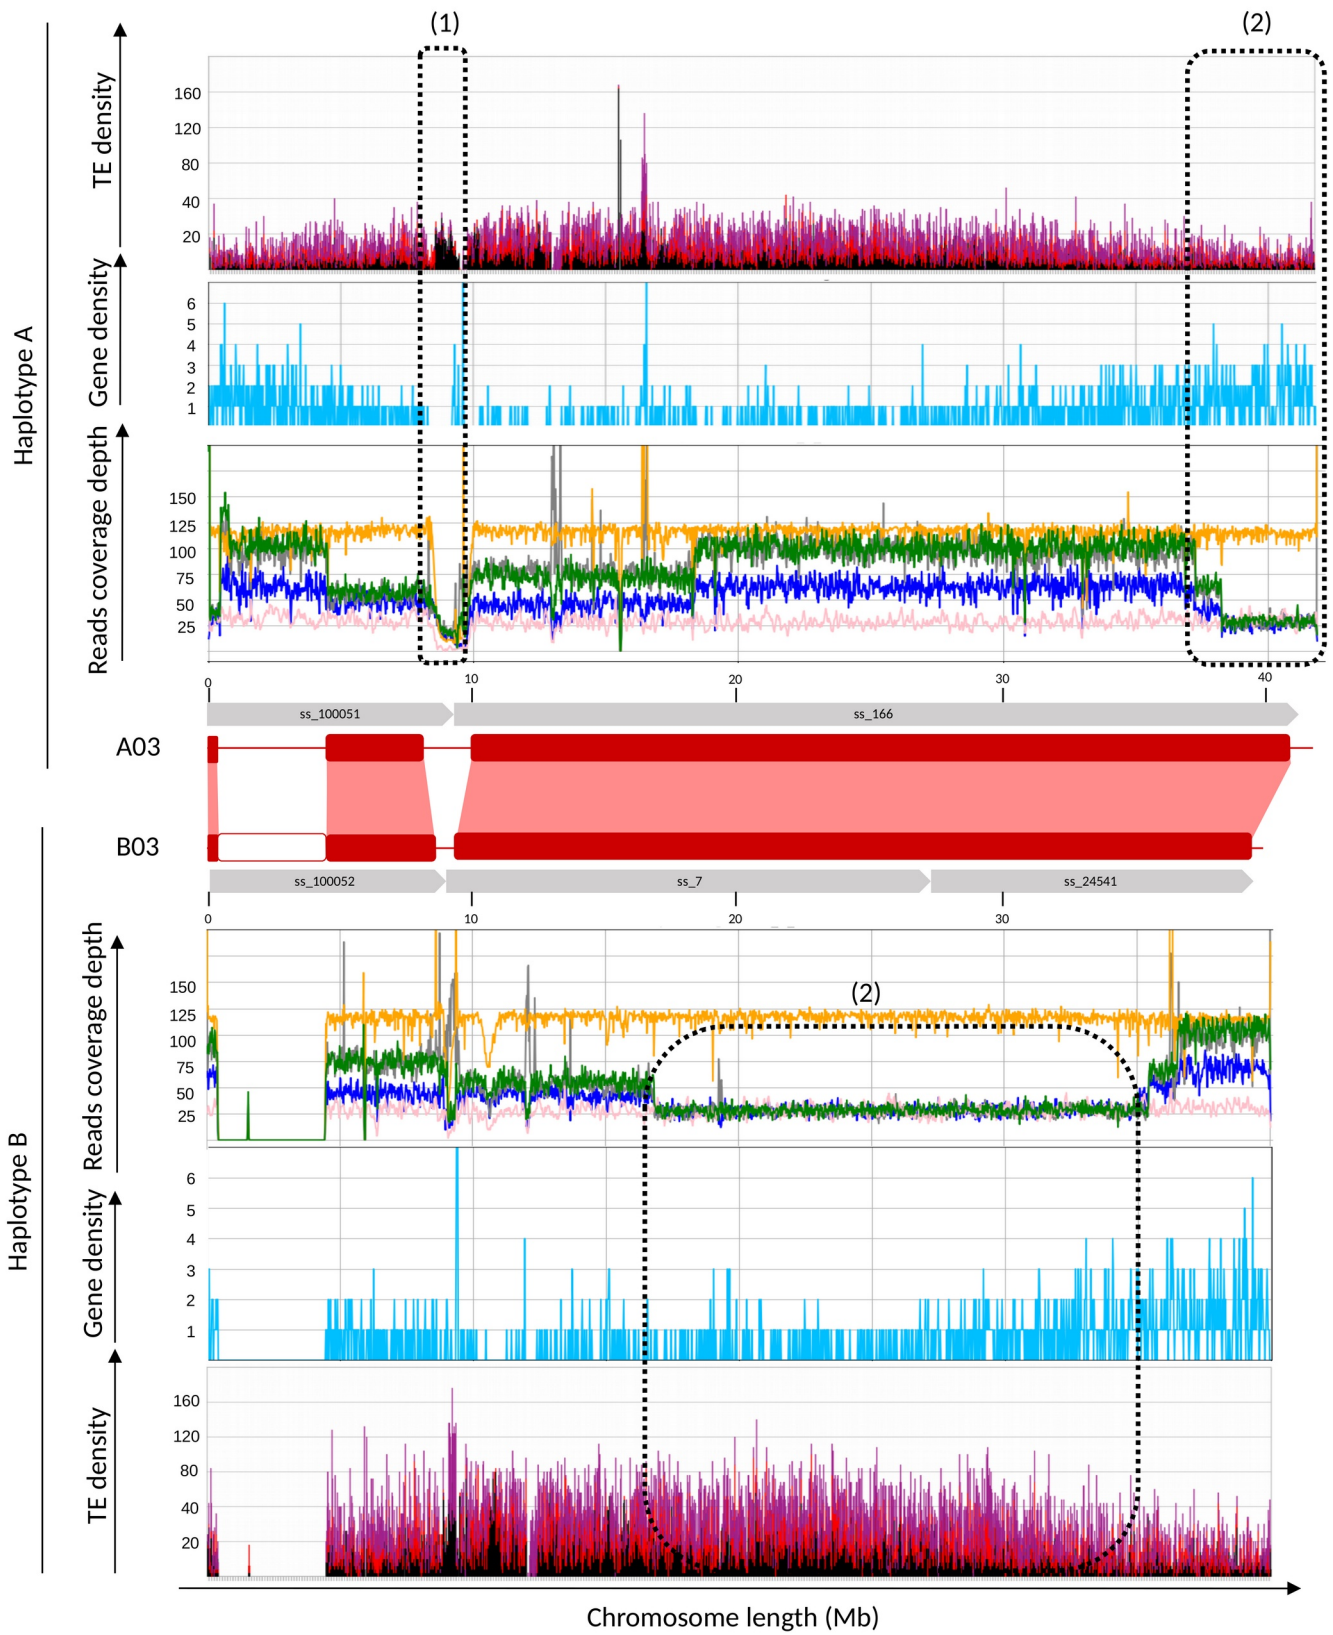

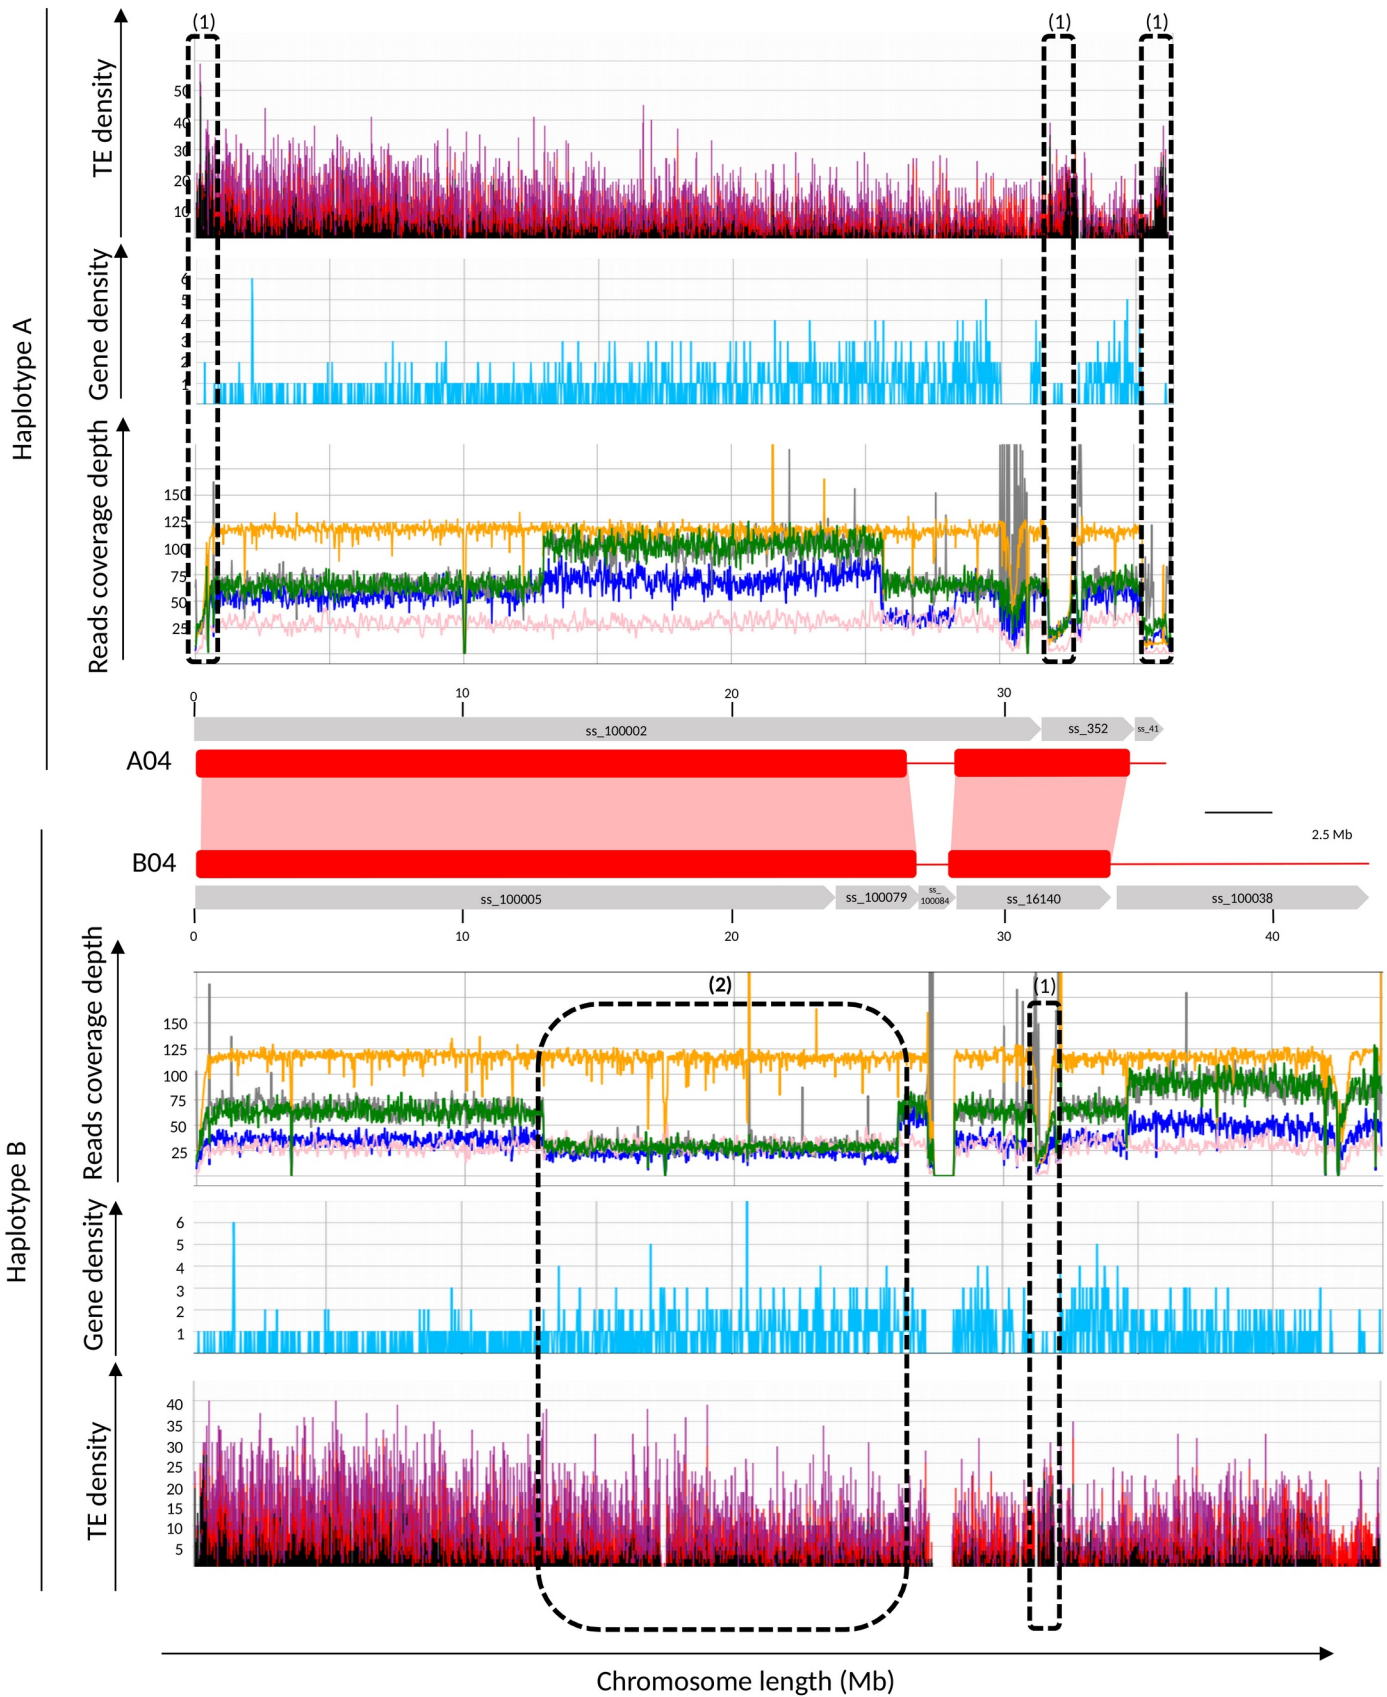

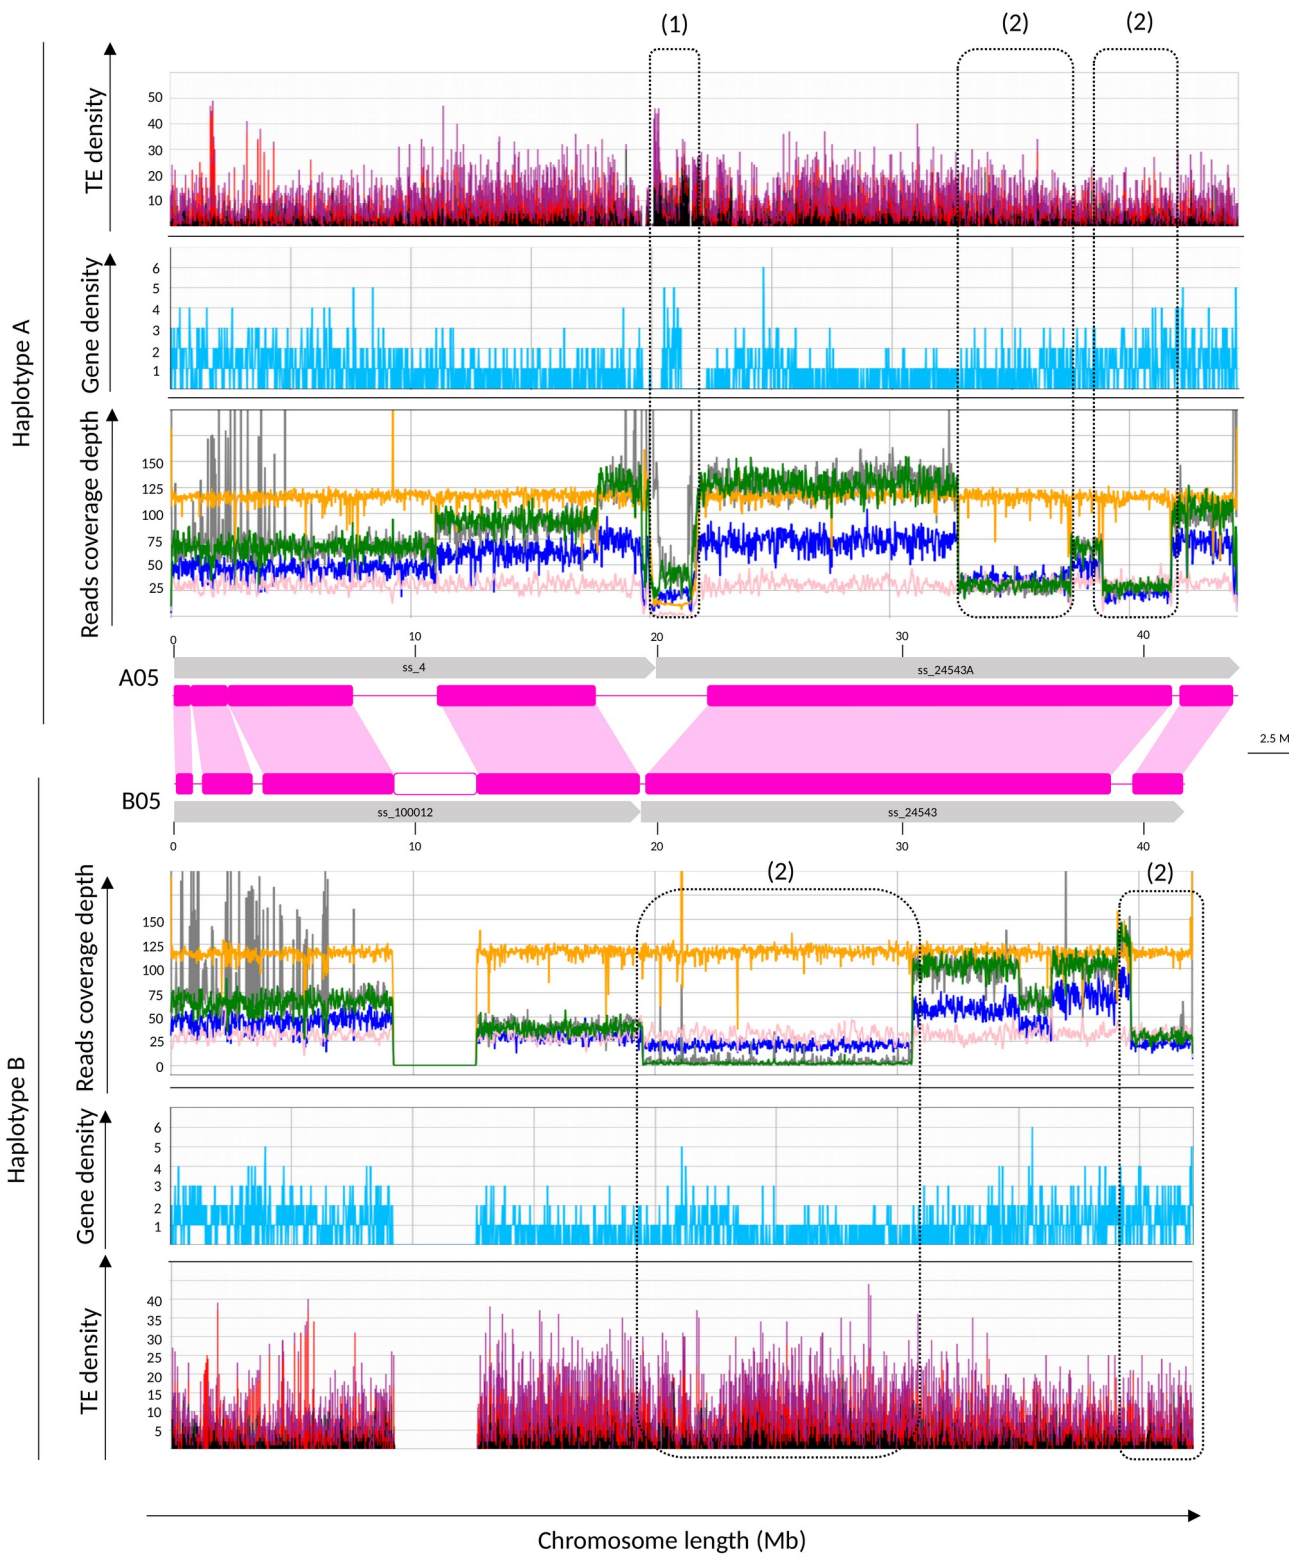

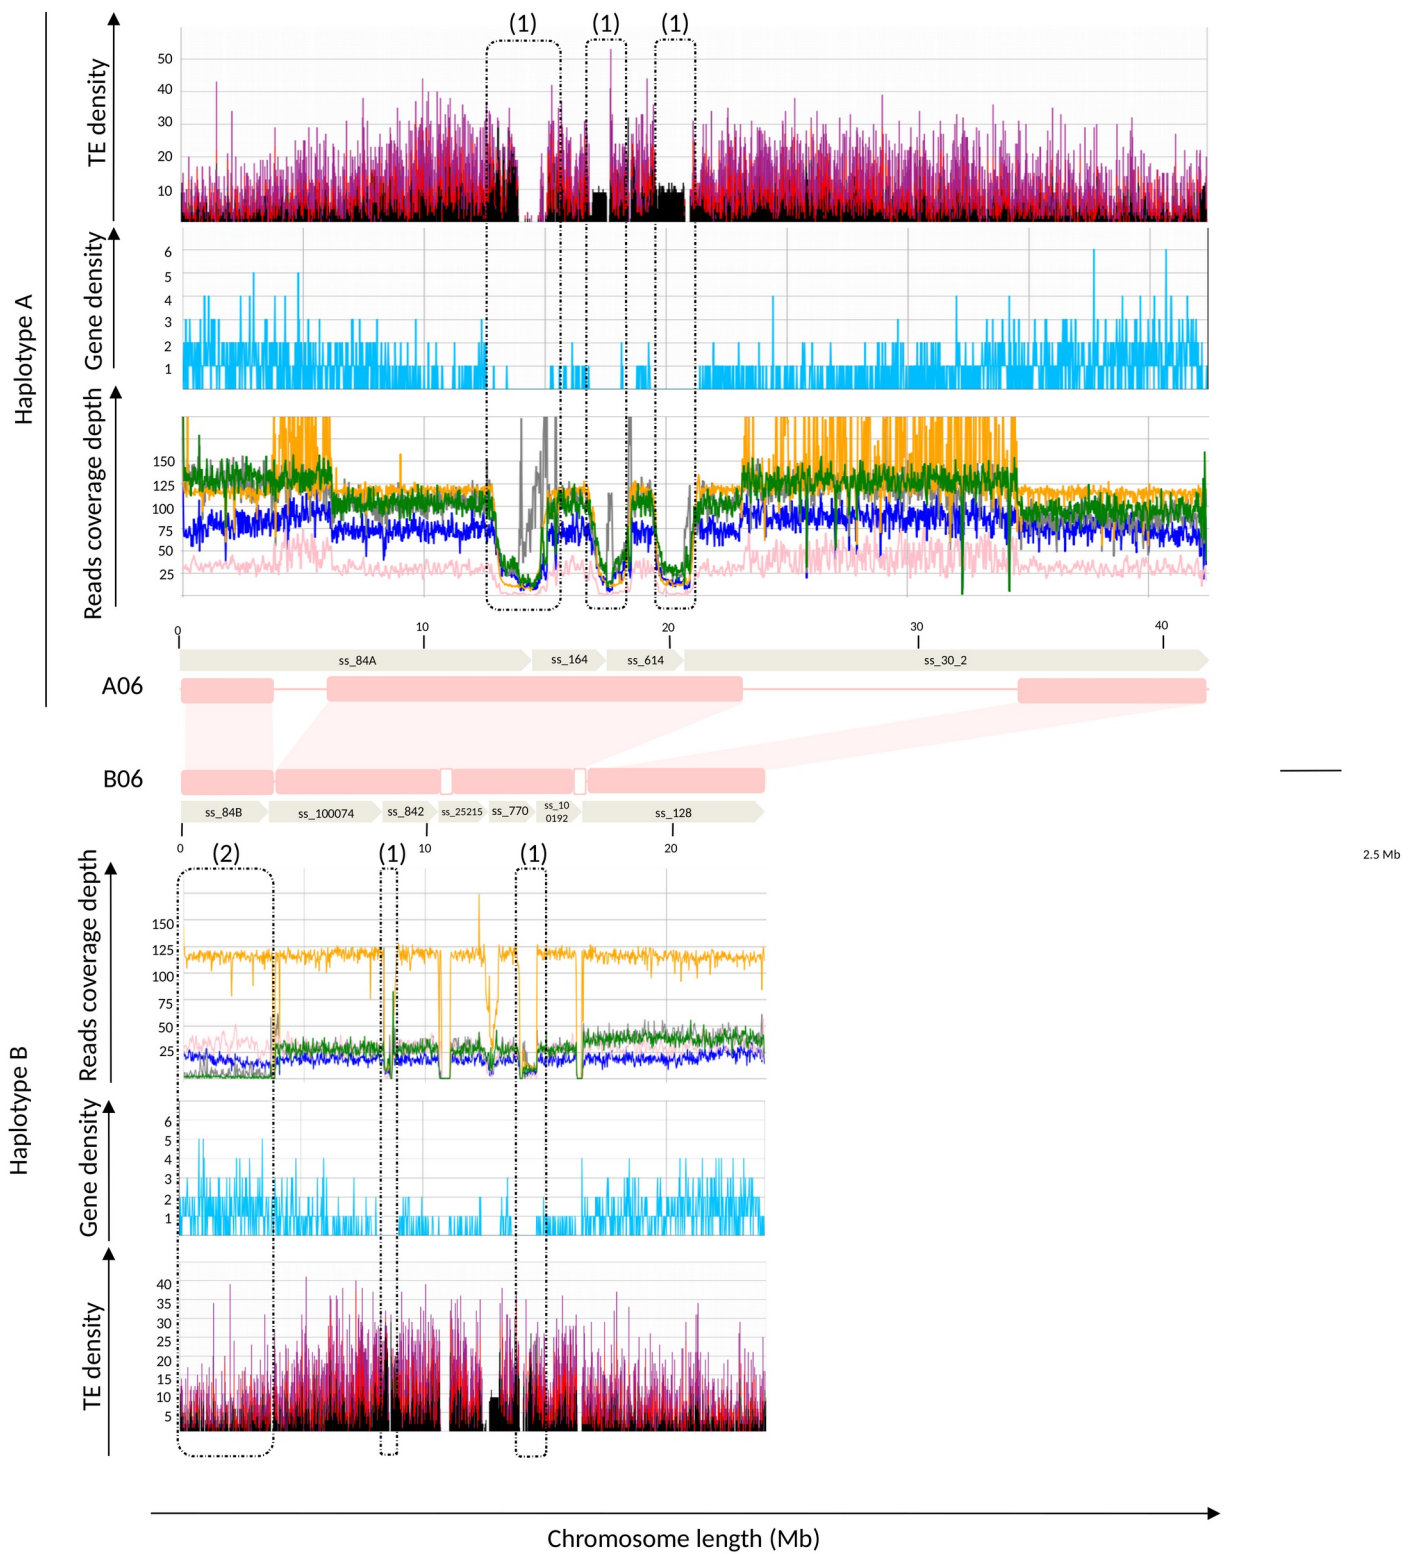



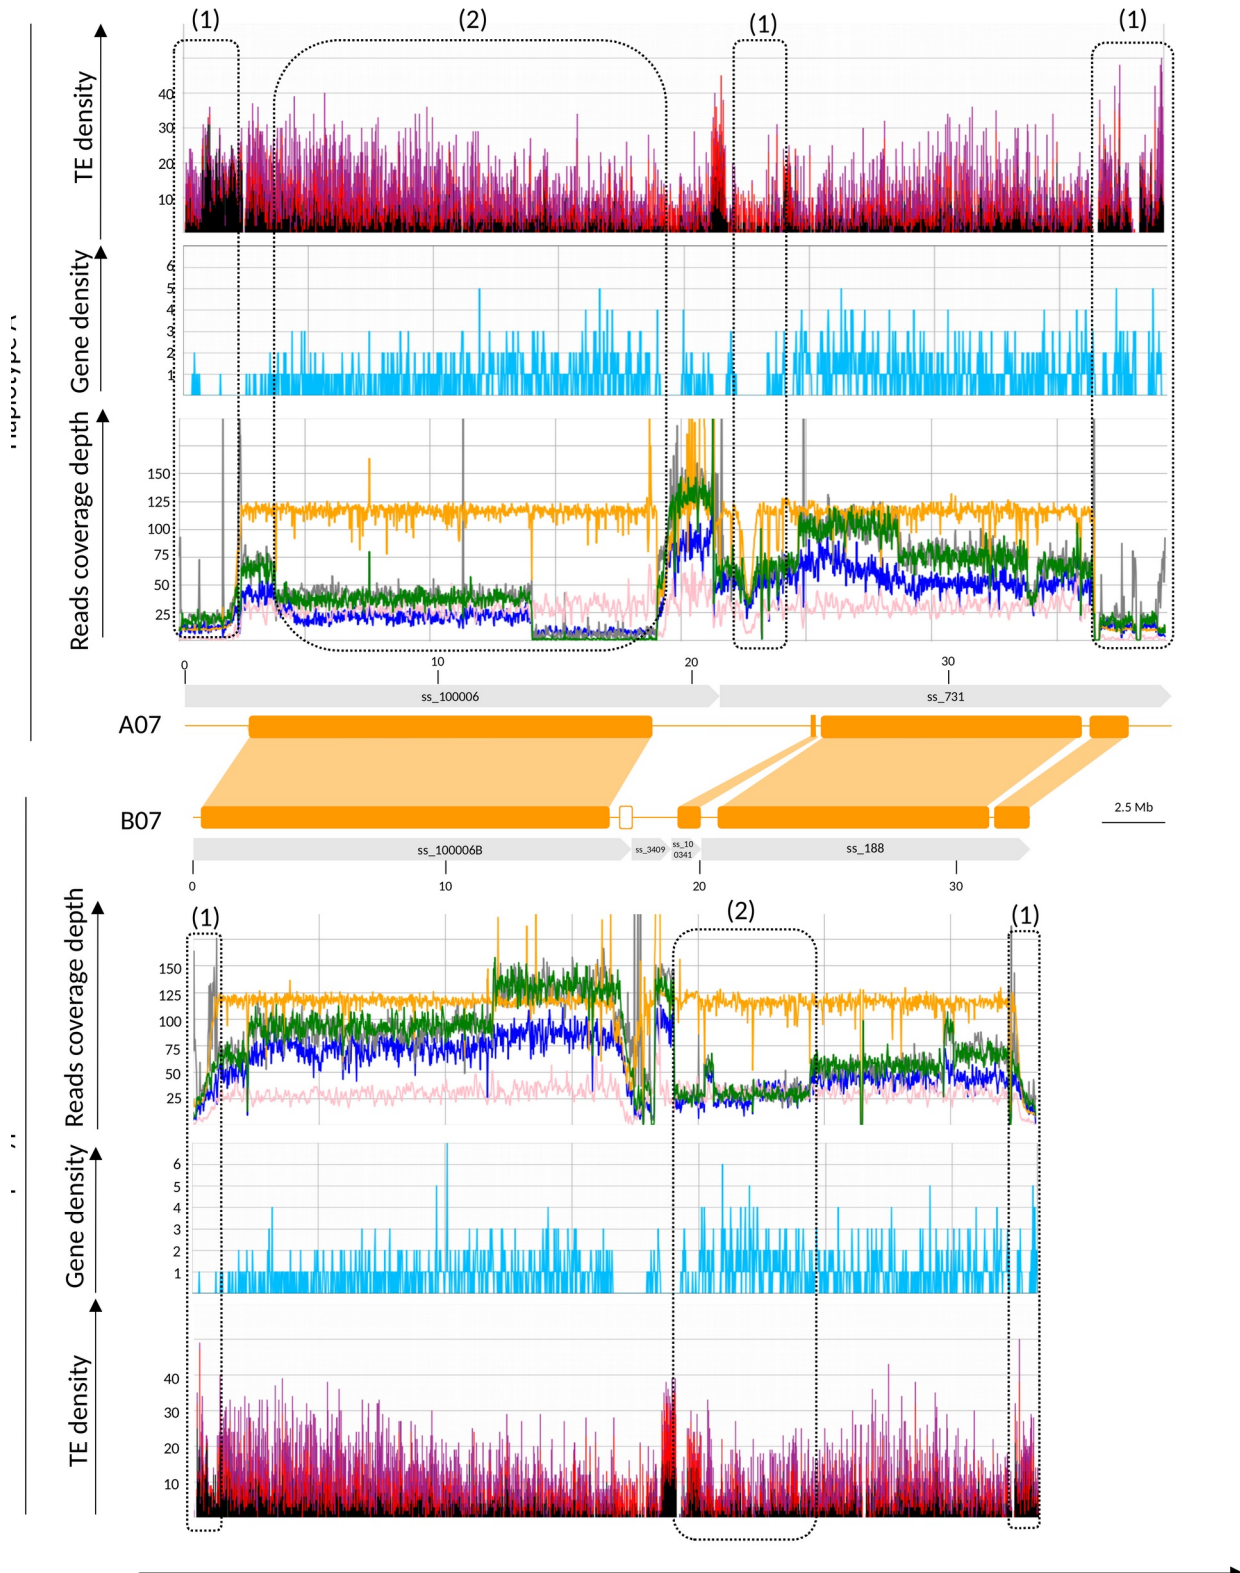

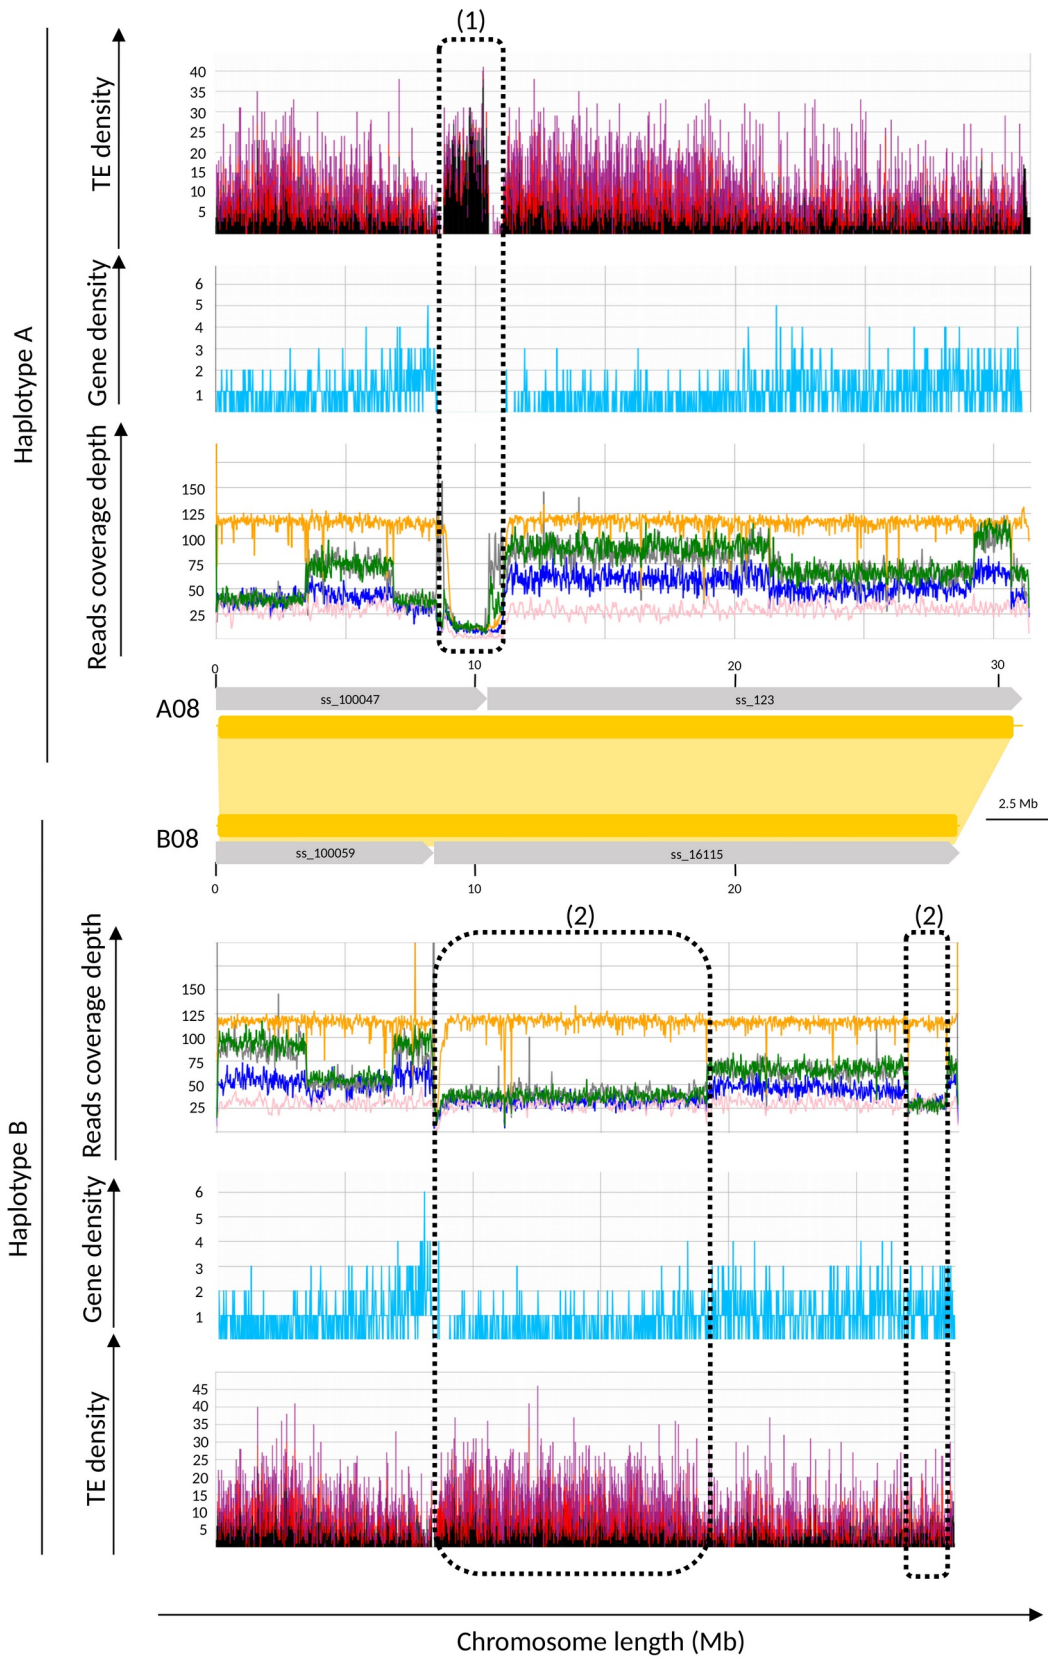

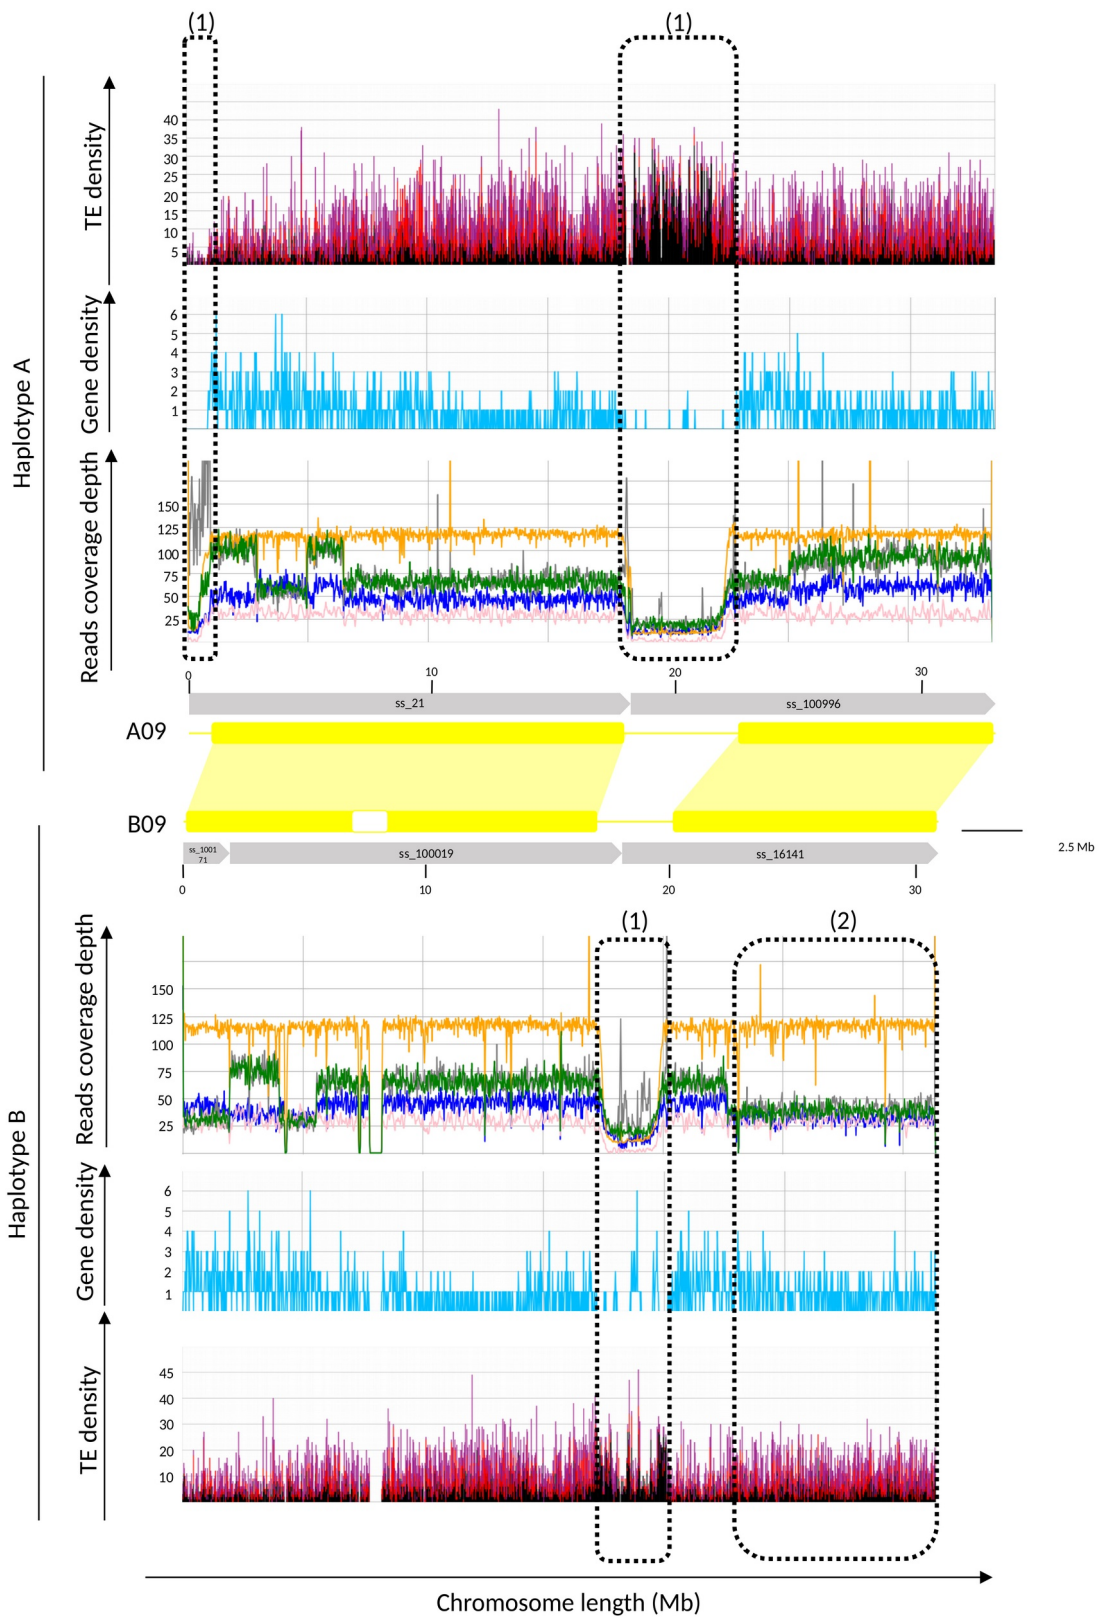

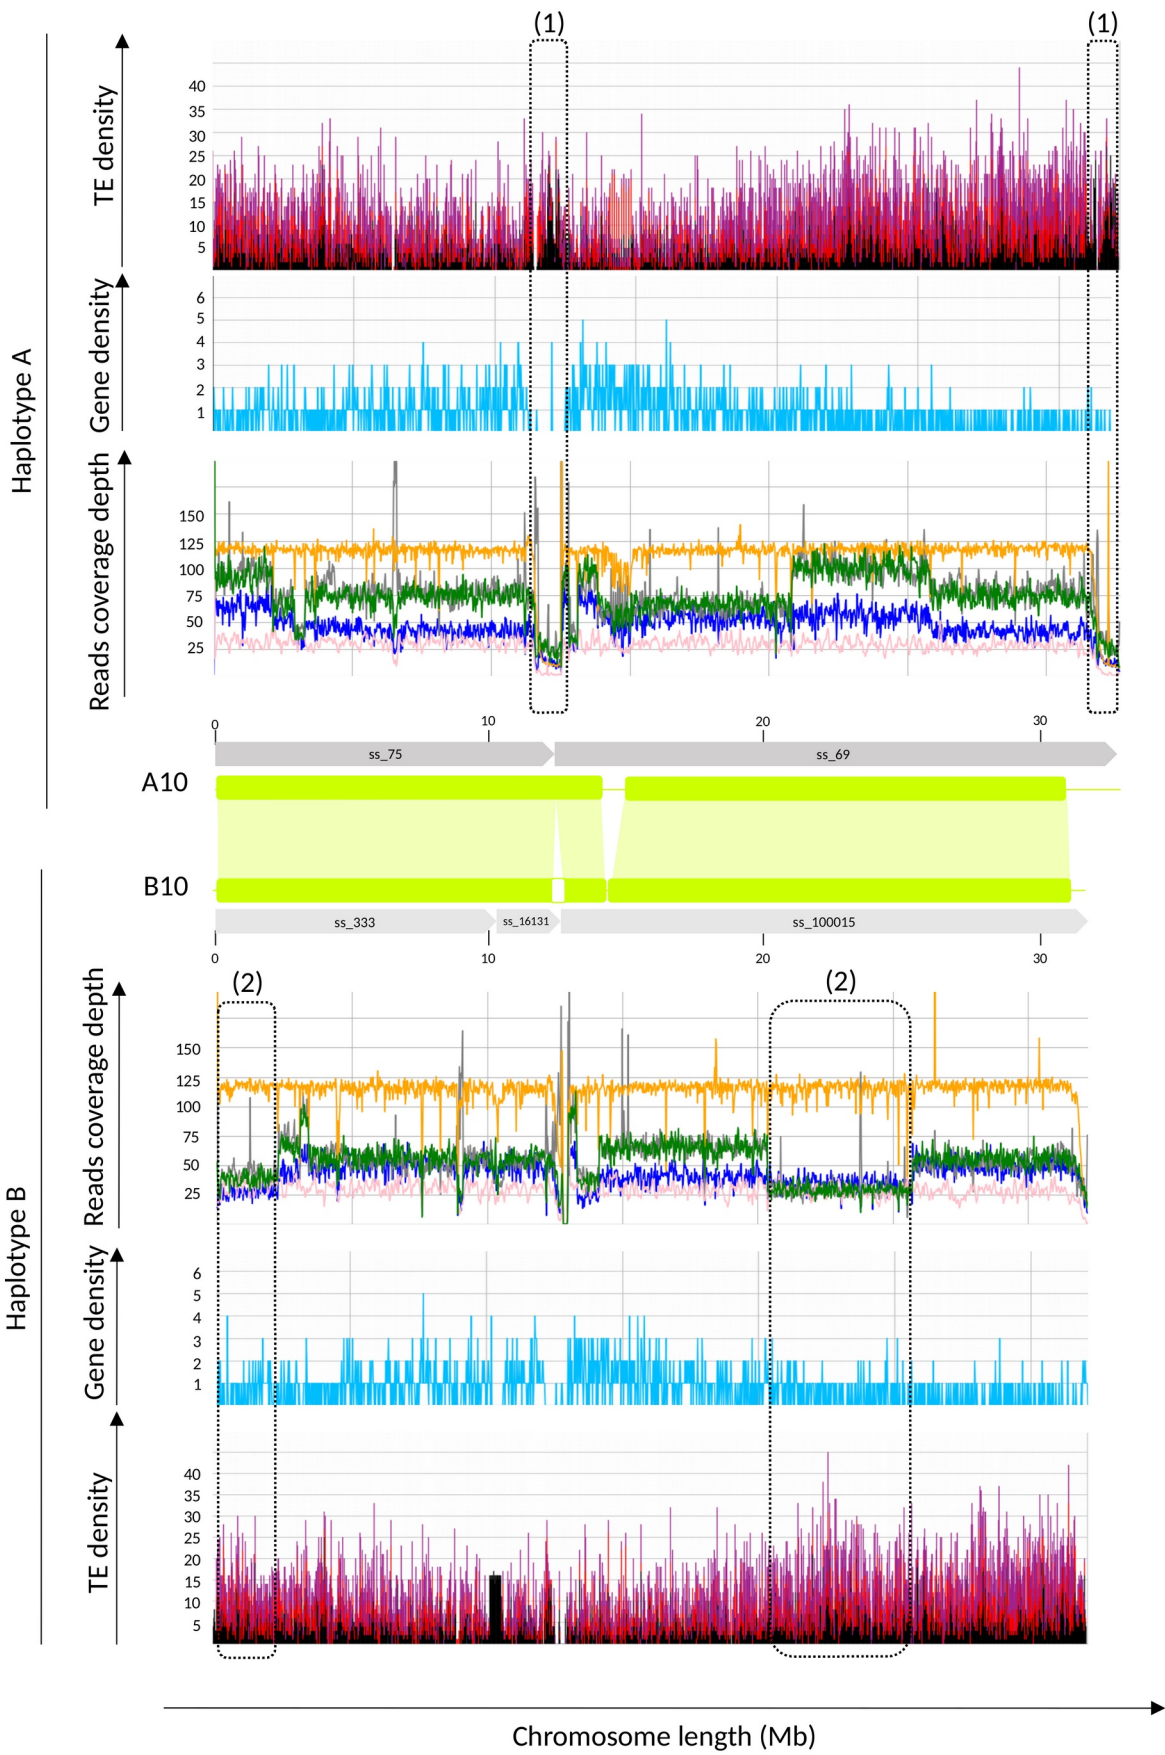

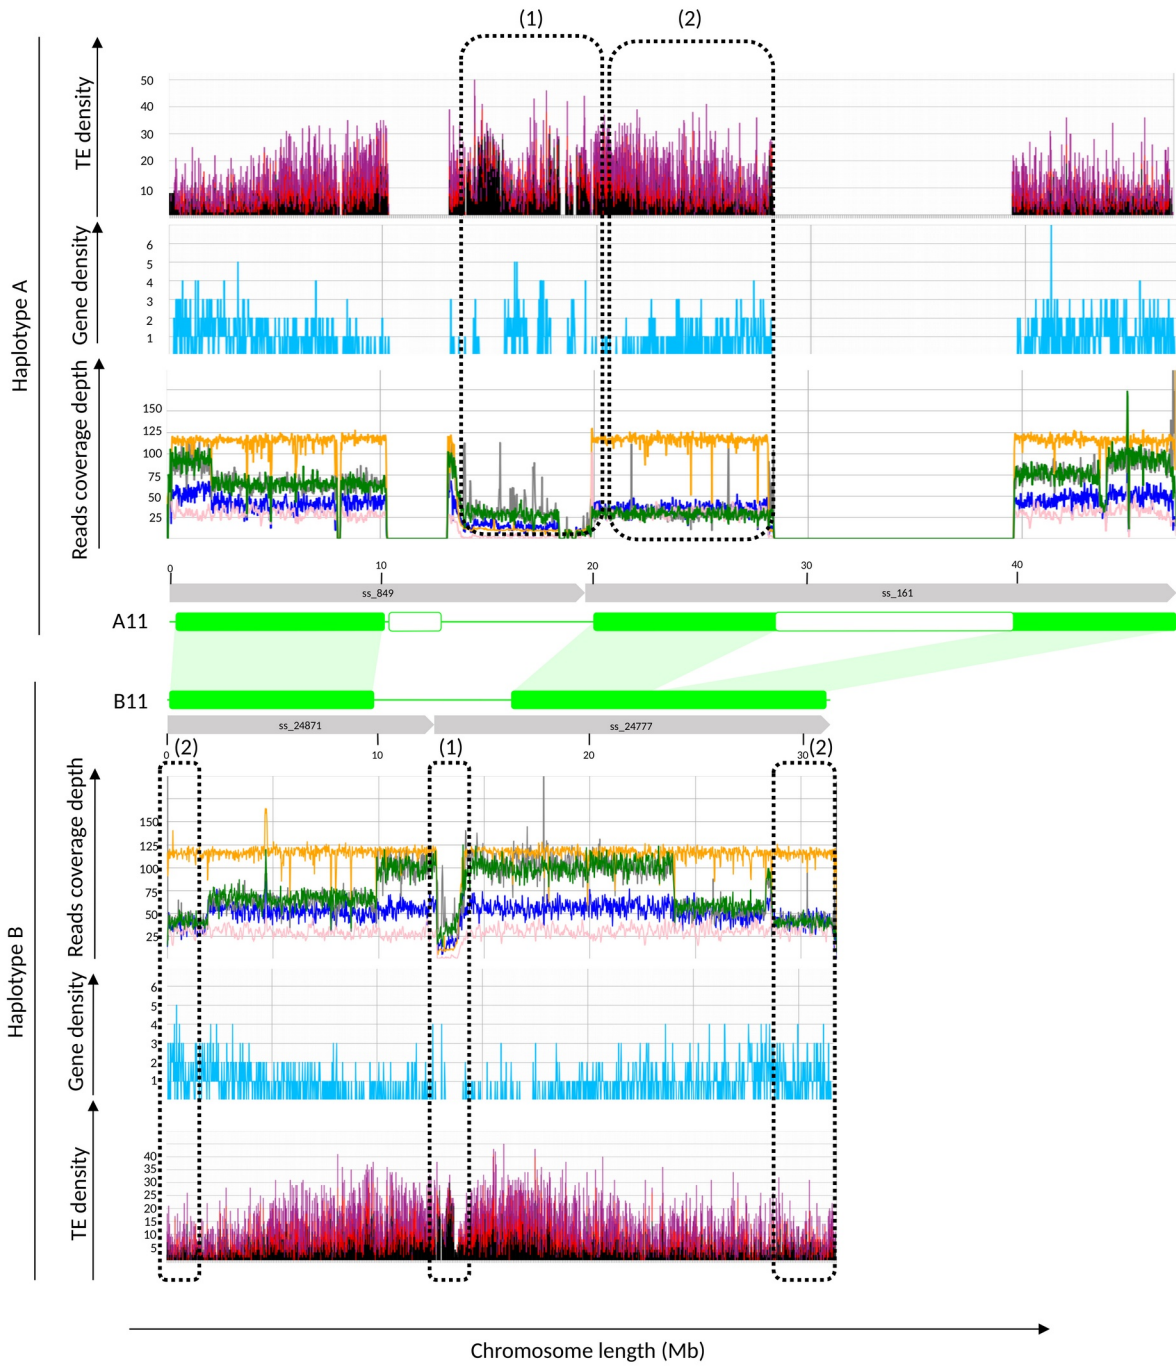

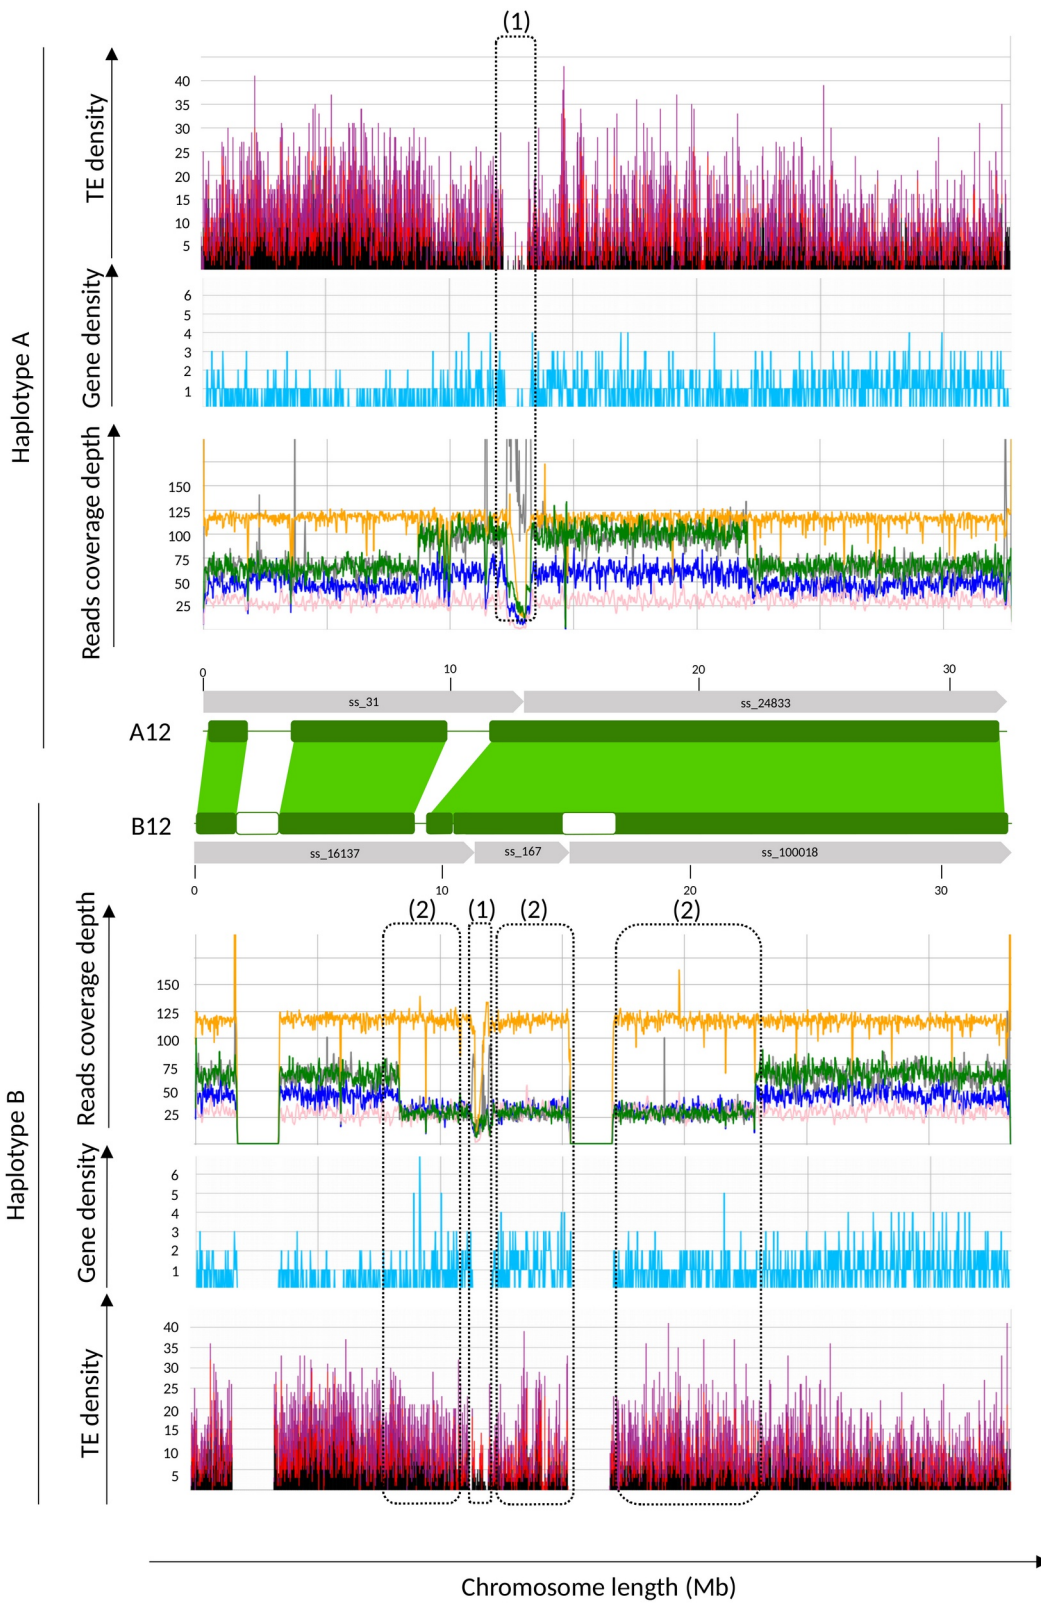

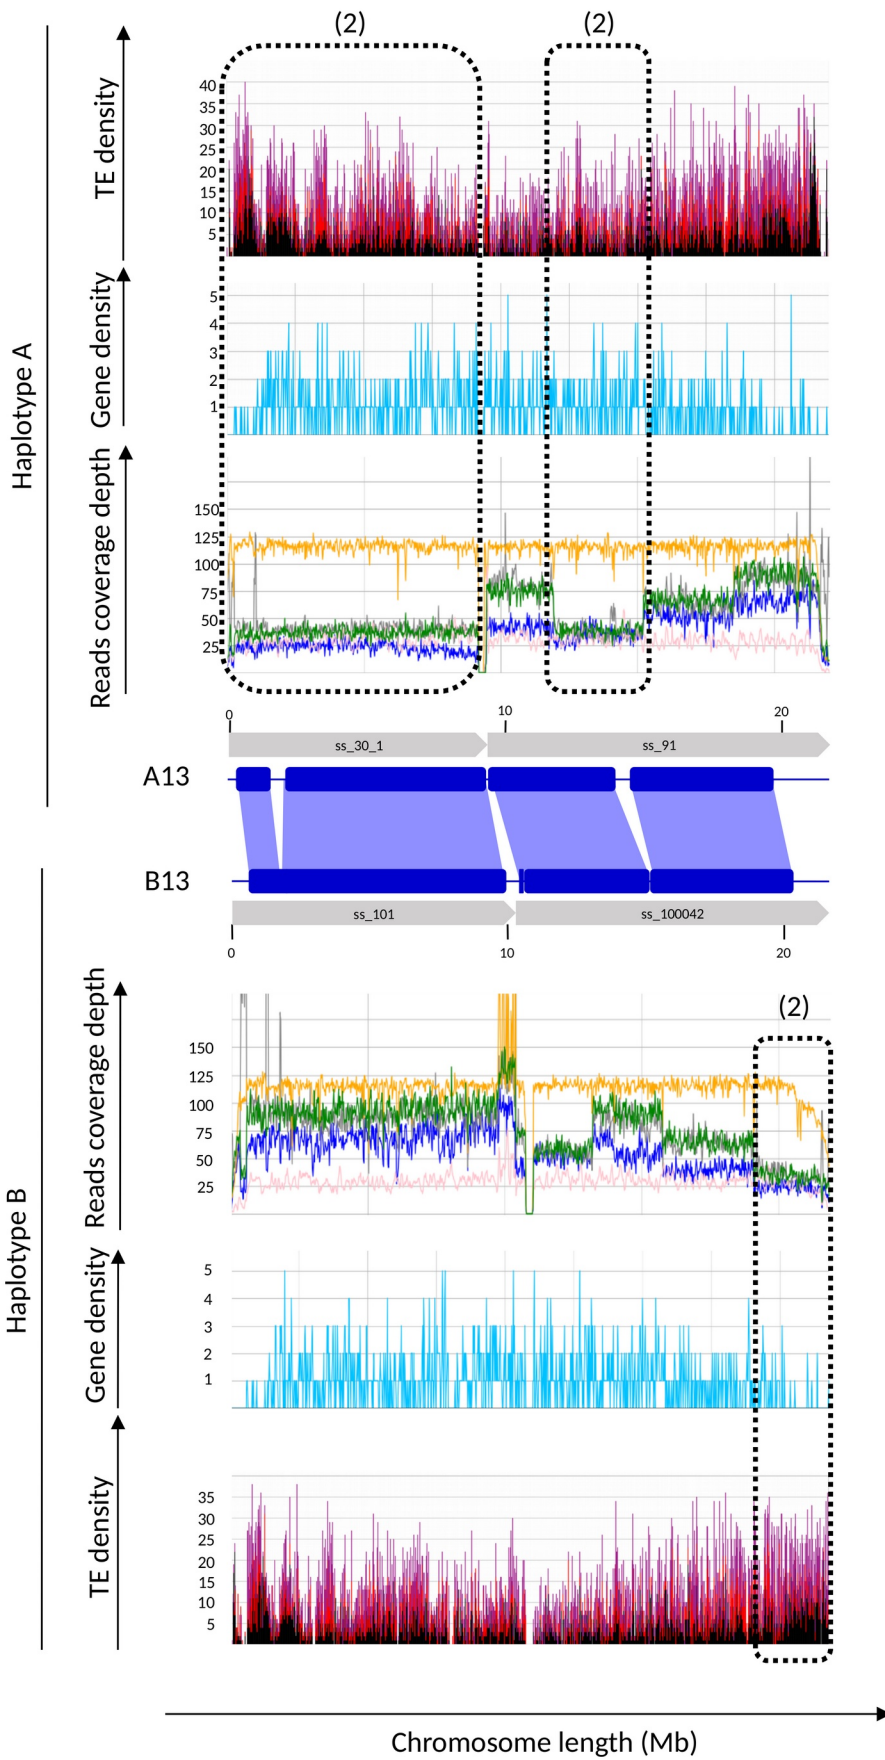

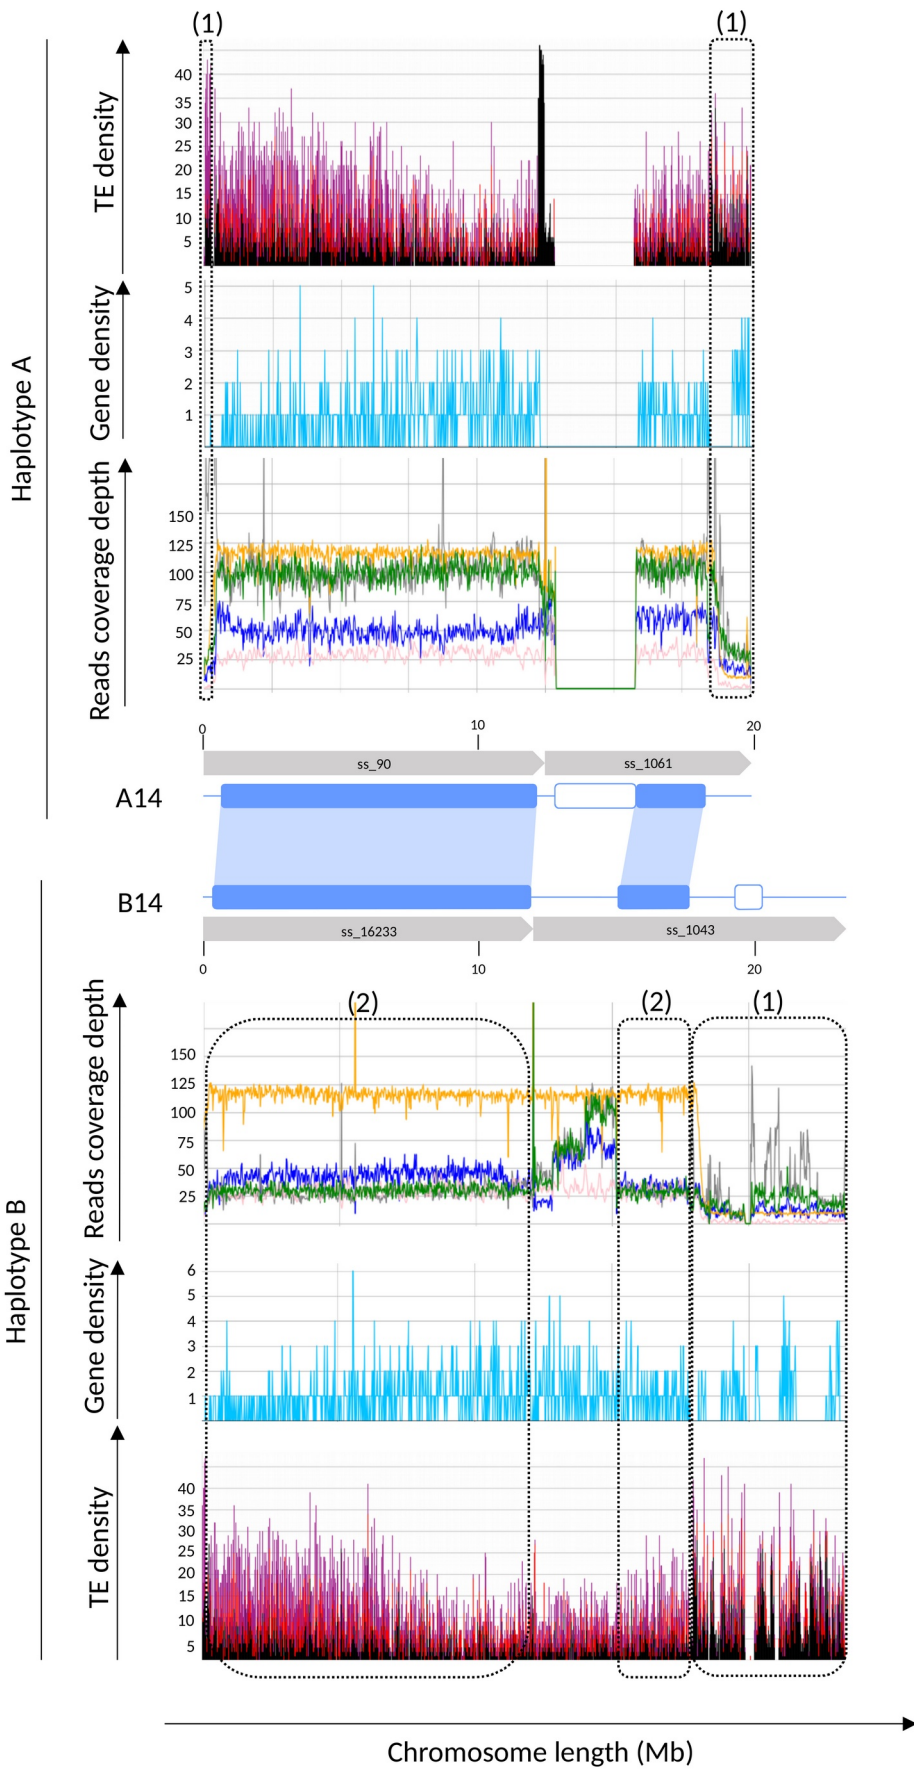



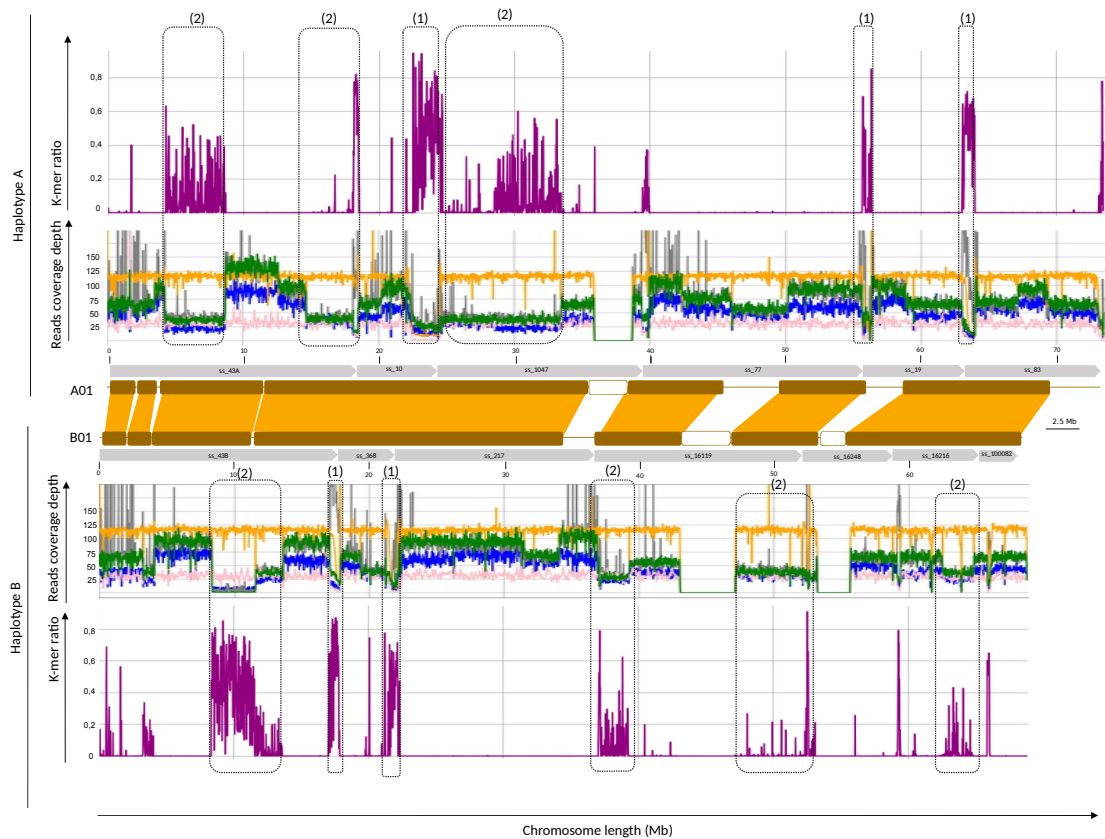

68 Supplemental Figure 10 Sequencing reads coverage depth and 5X-15X depth k-mers density  
69 distribution along the 14 pairs of chromosomes  
70 Obtained by mapping Daphna Illumina reads (yellow), CR0040 PacBio Hifi (blue), Nanopore  
71 reads (green) and optical mapping data (red) on the CR0040 assembly. The ratio of k-mers  
72 (47-mers) of depth between 5X and 15X are represented along each pair of chromosomes  
73 (genomic windows of 20Kb). For other details see the legend of Supplemental Figure 9.

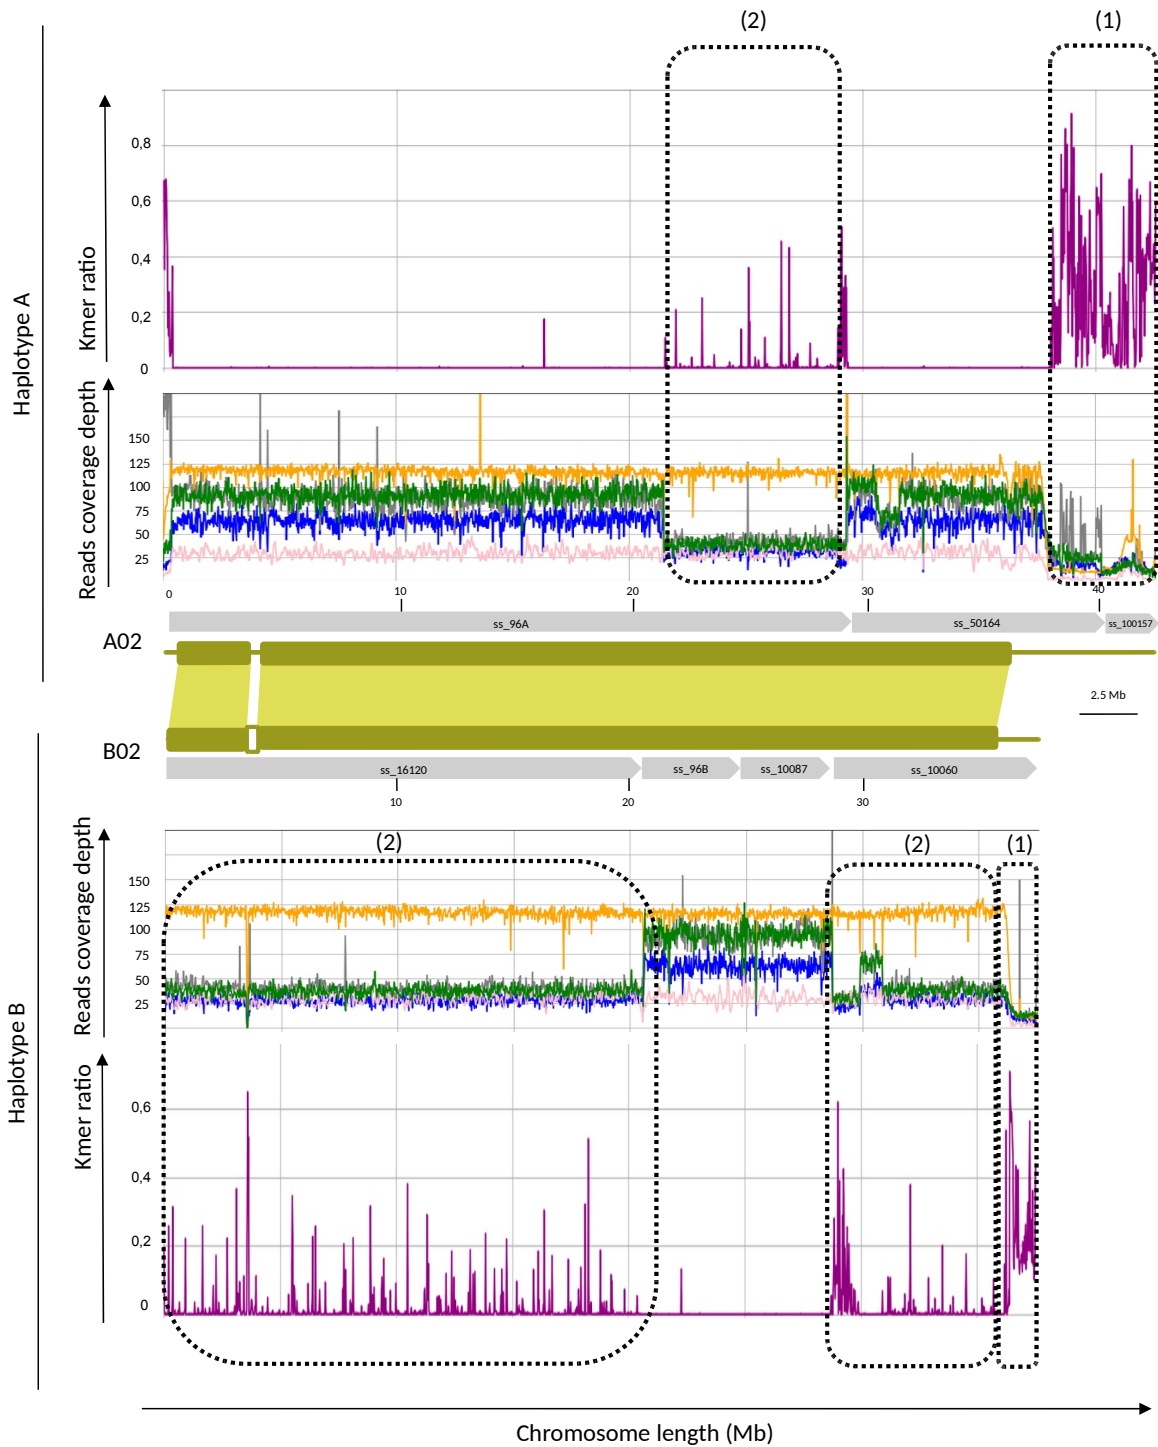

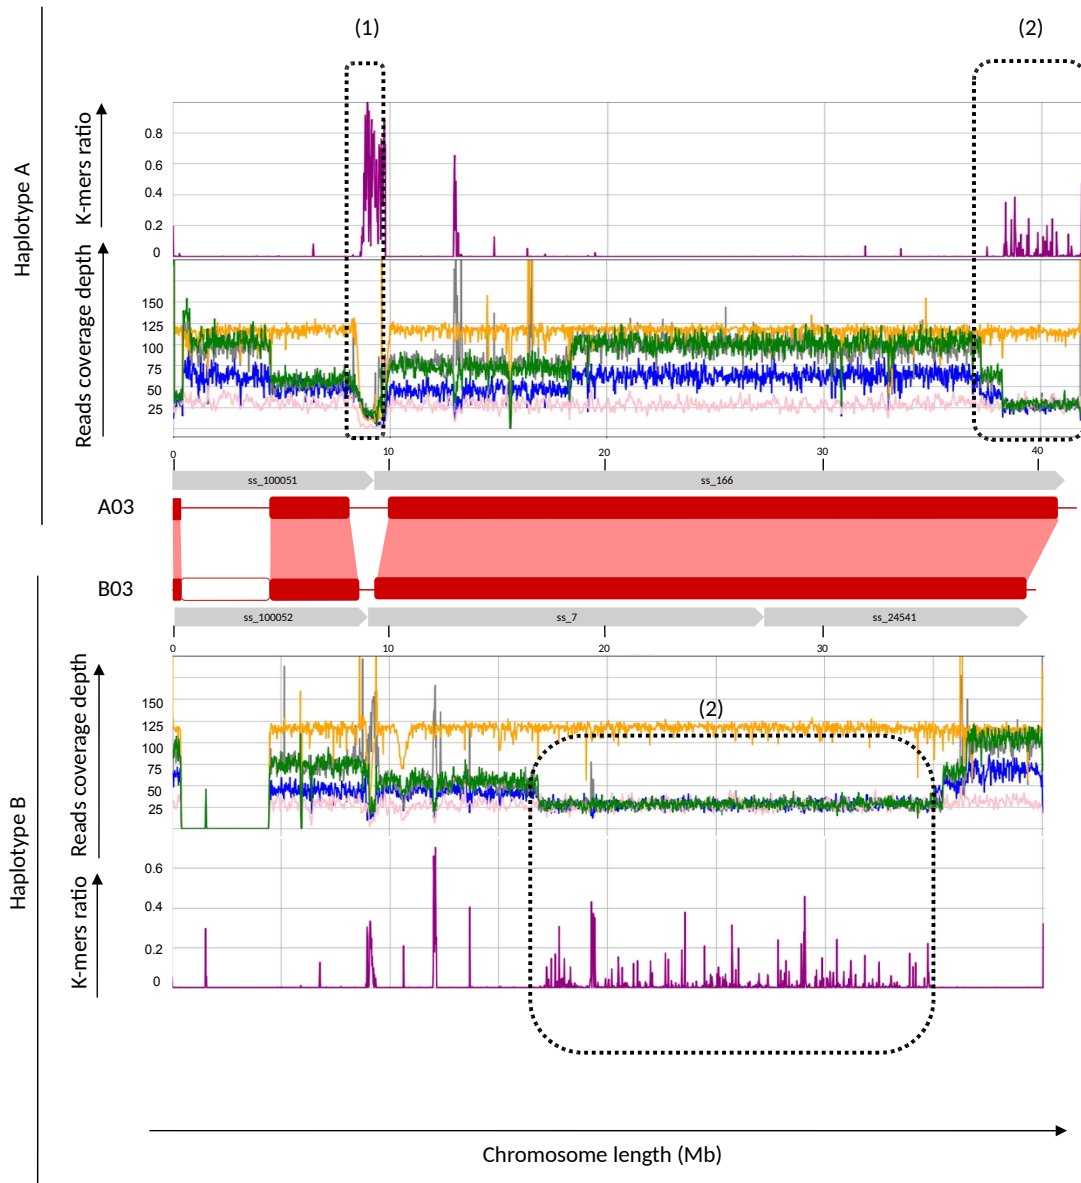

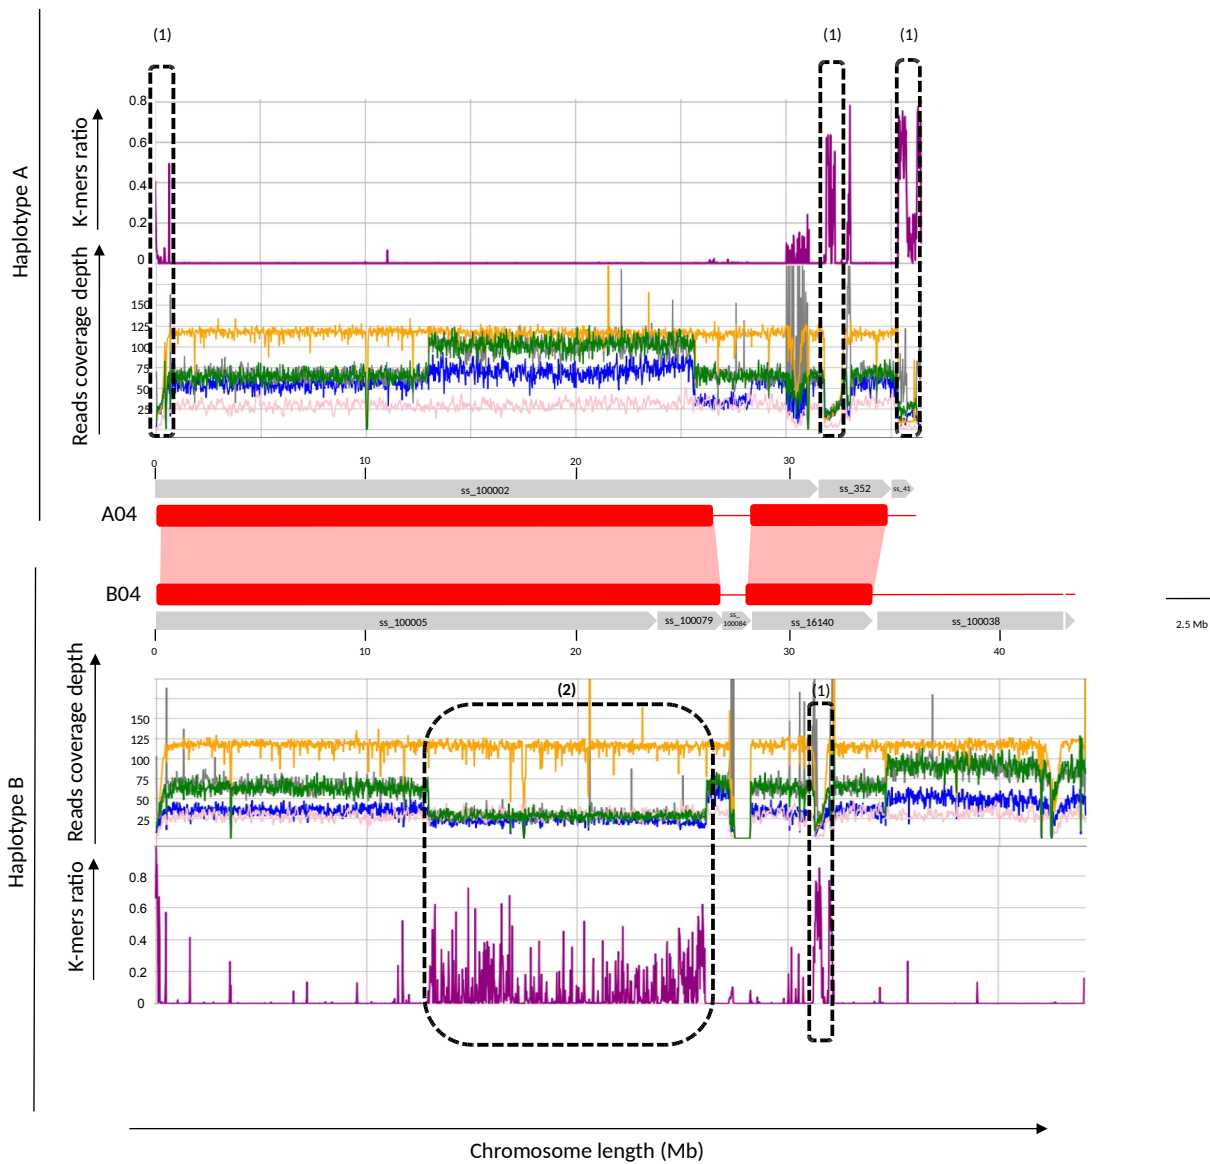

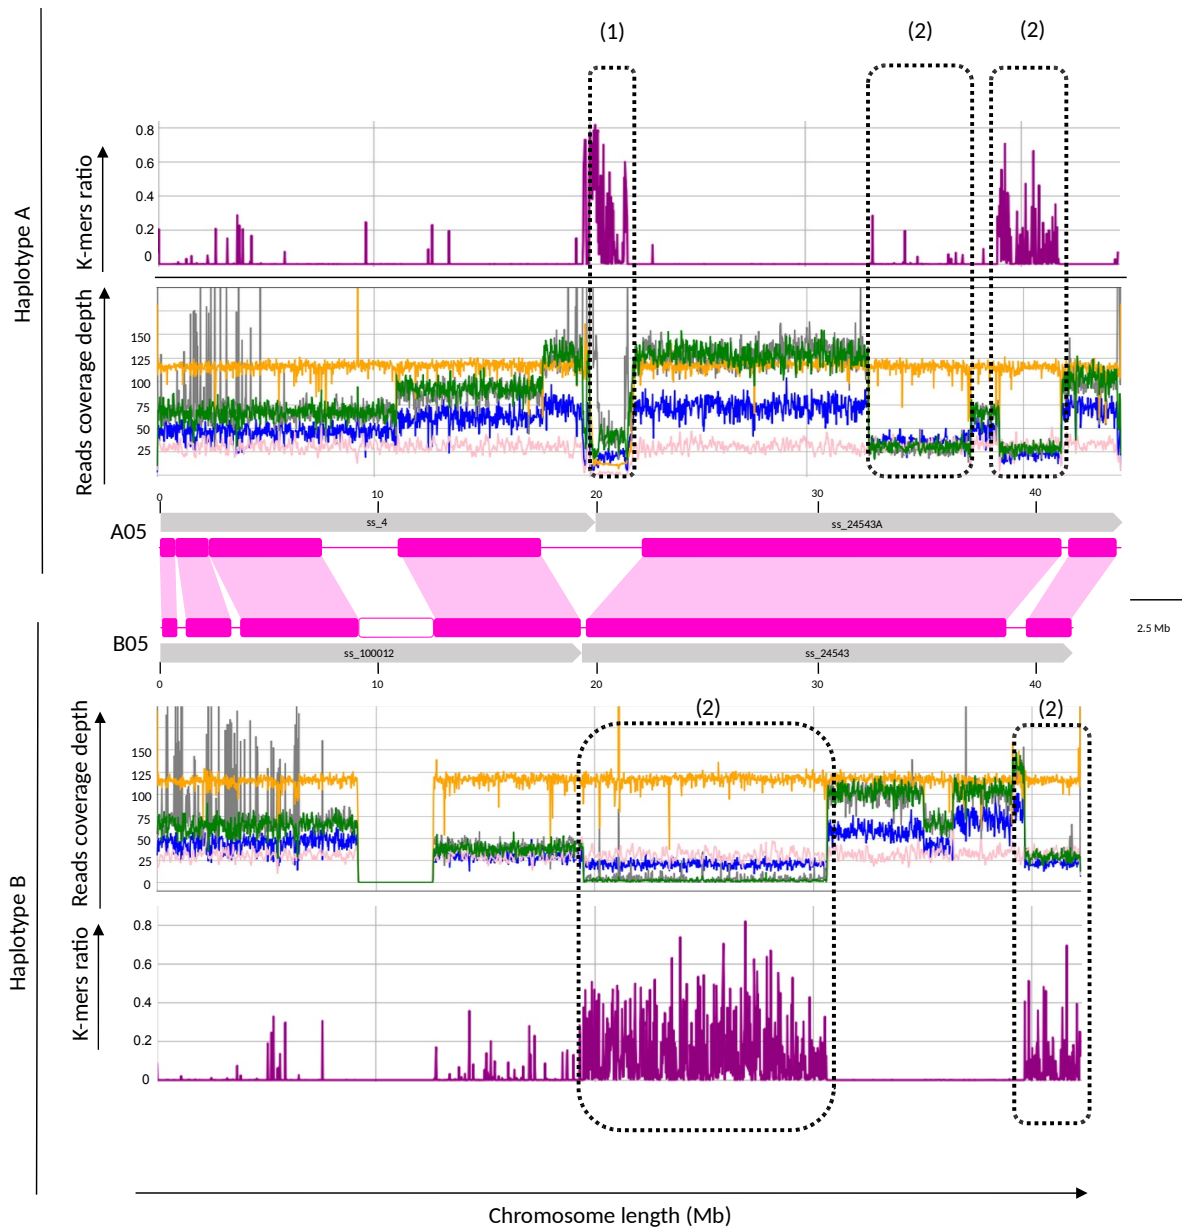

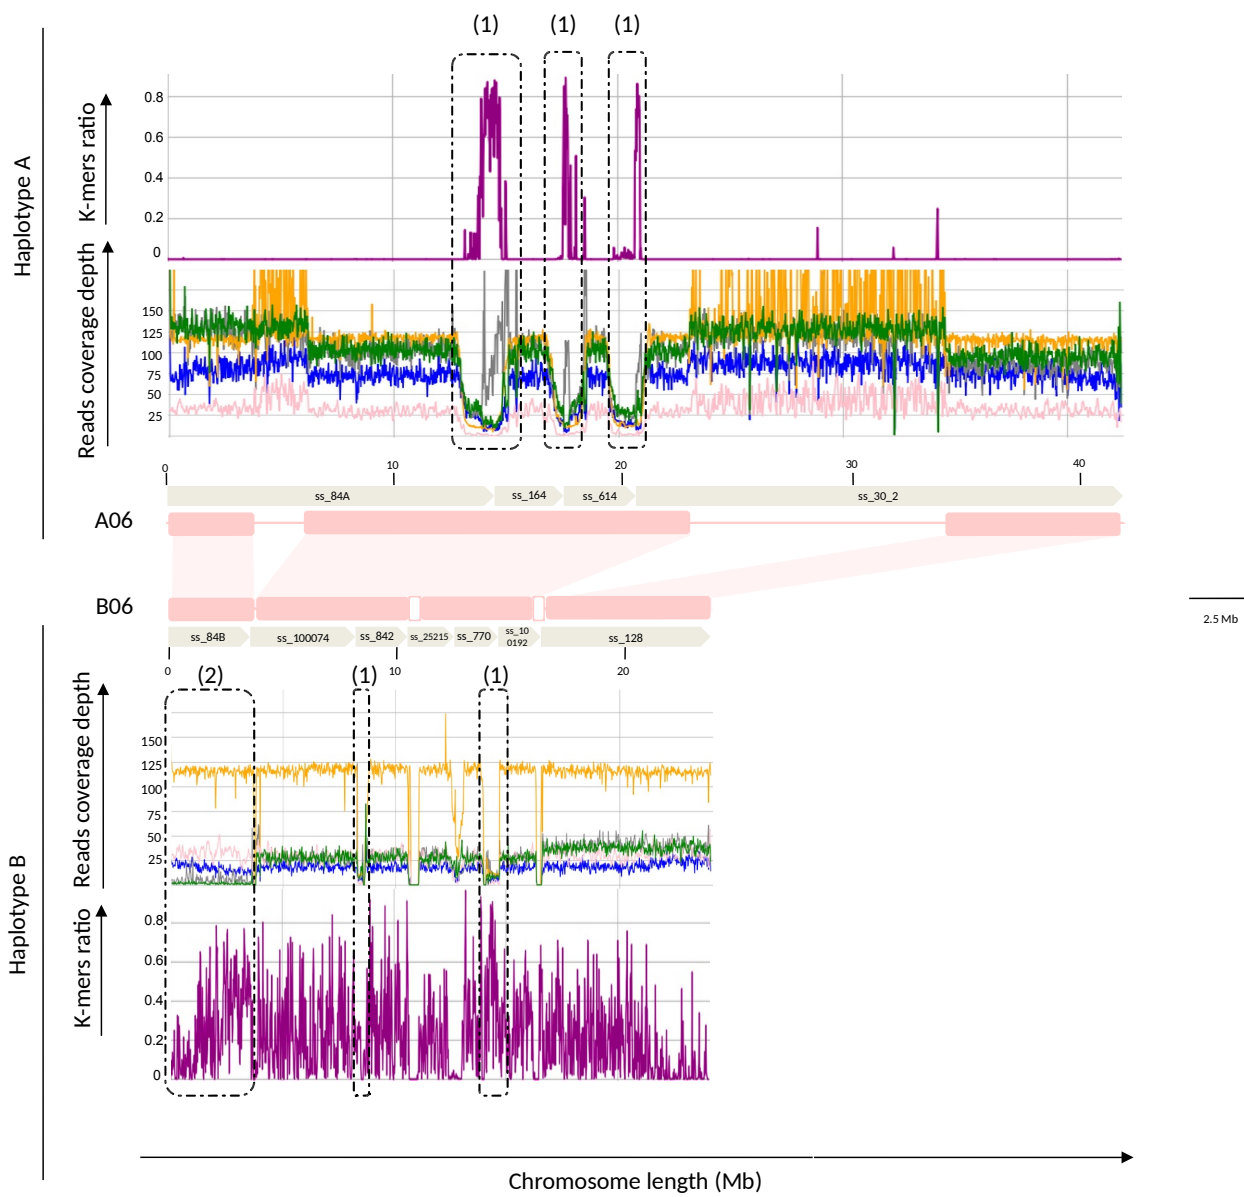

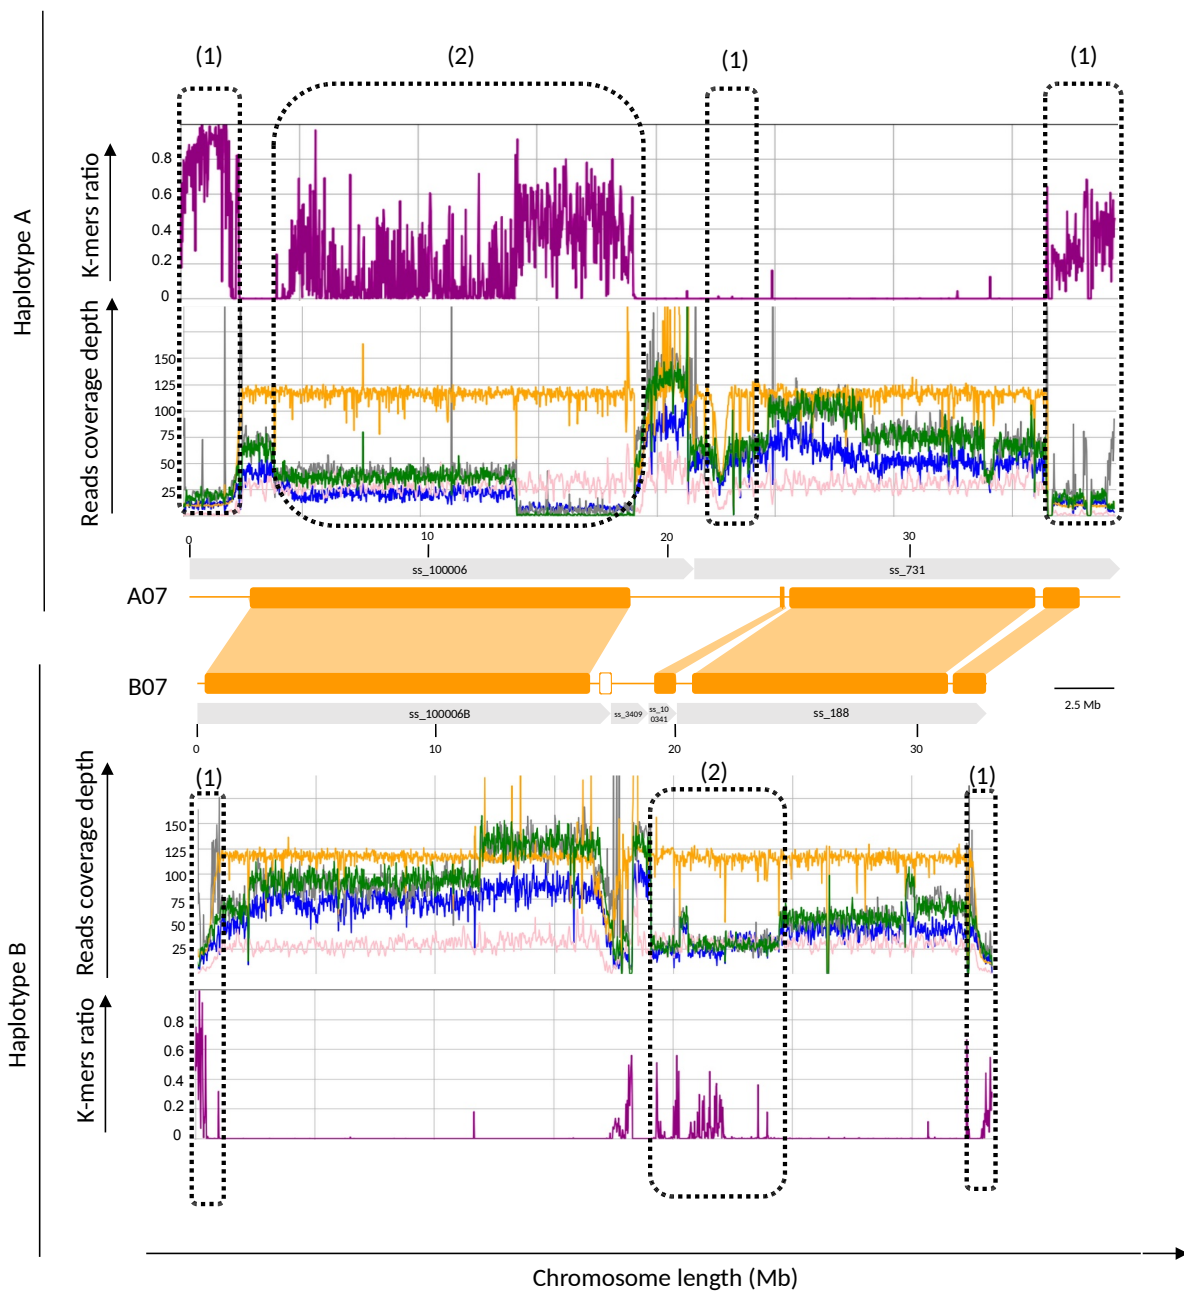

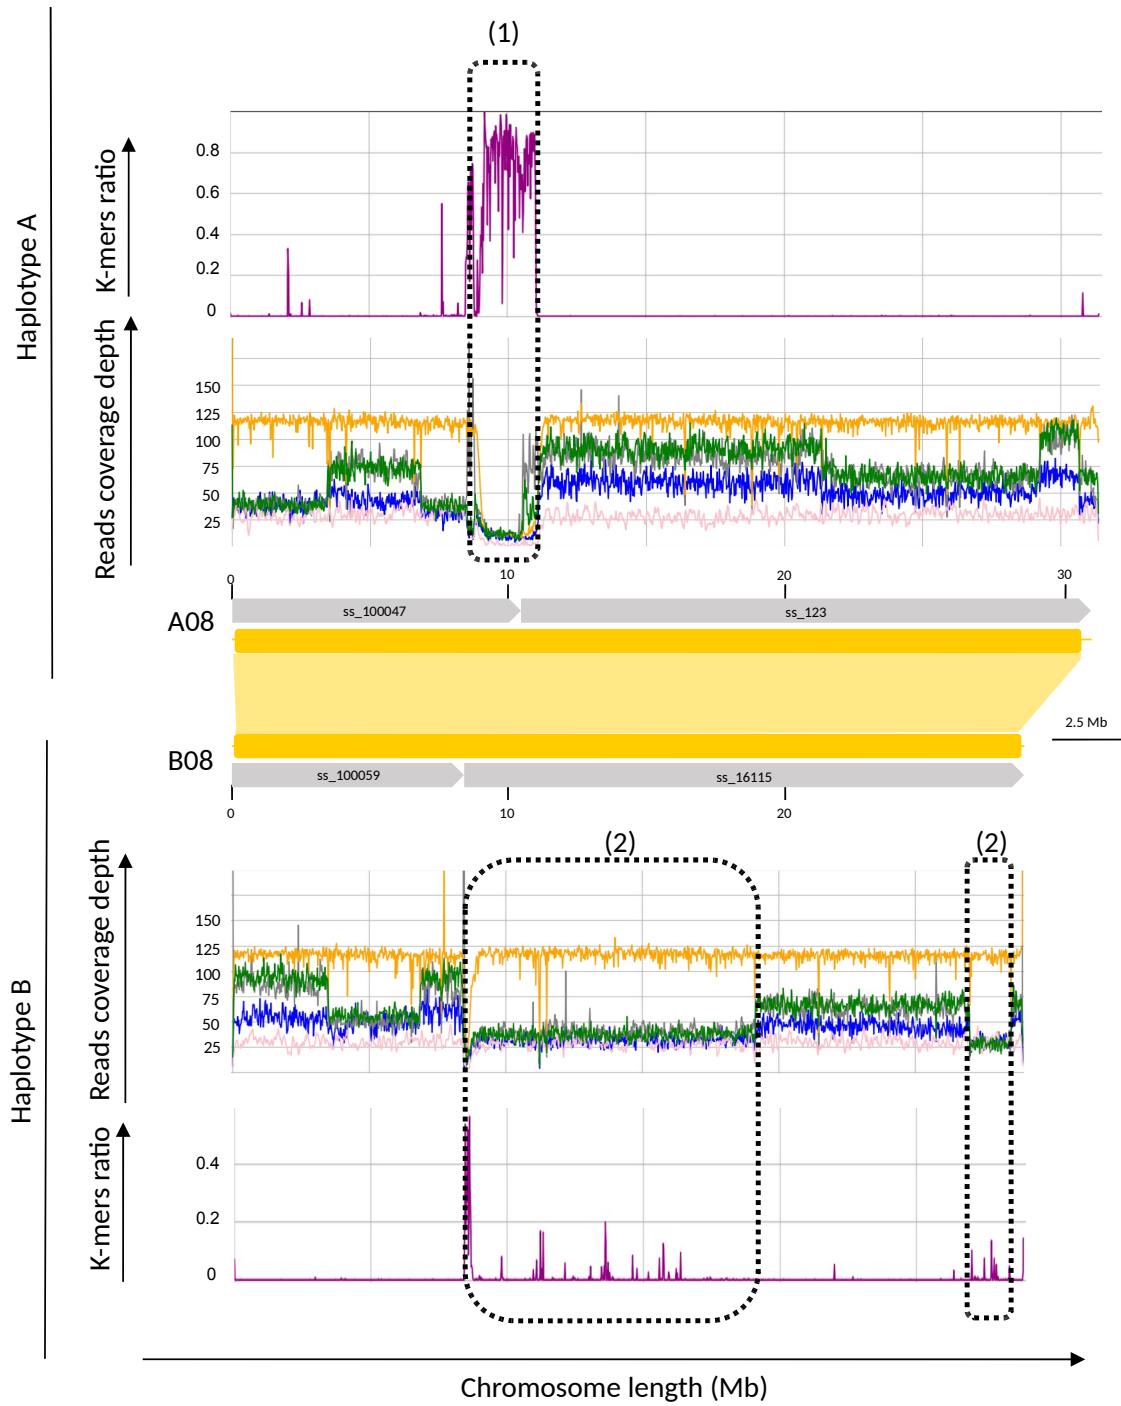



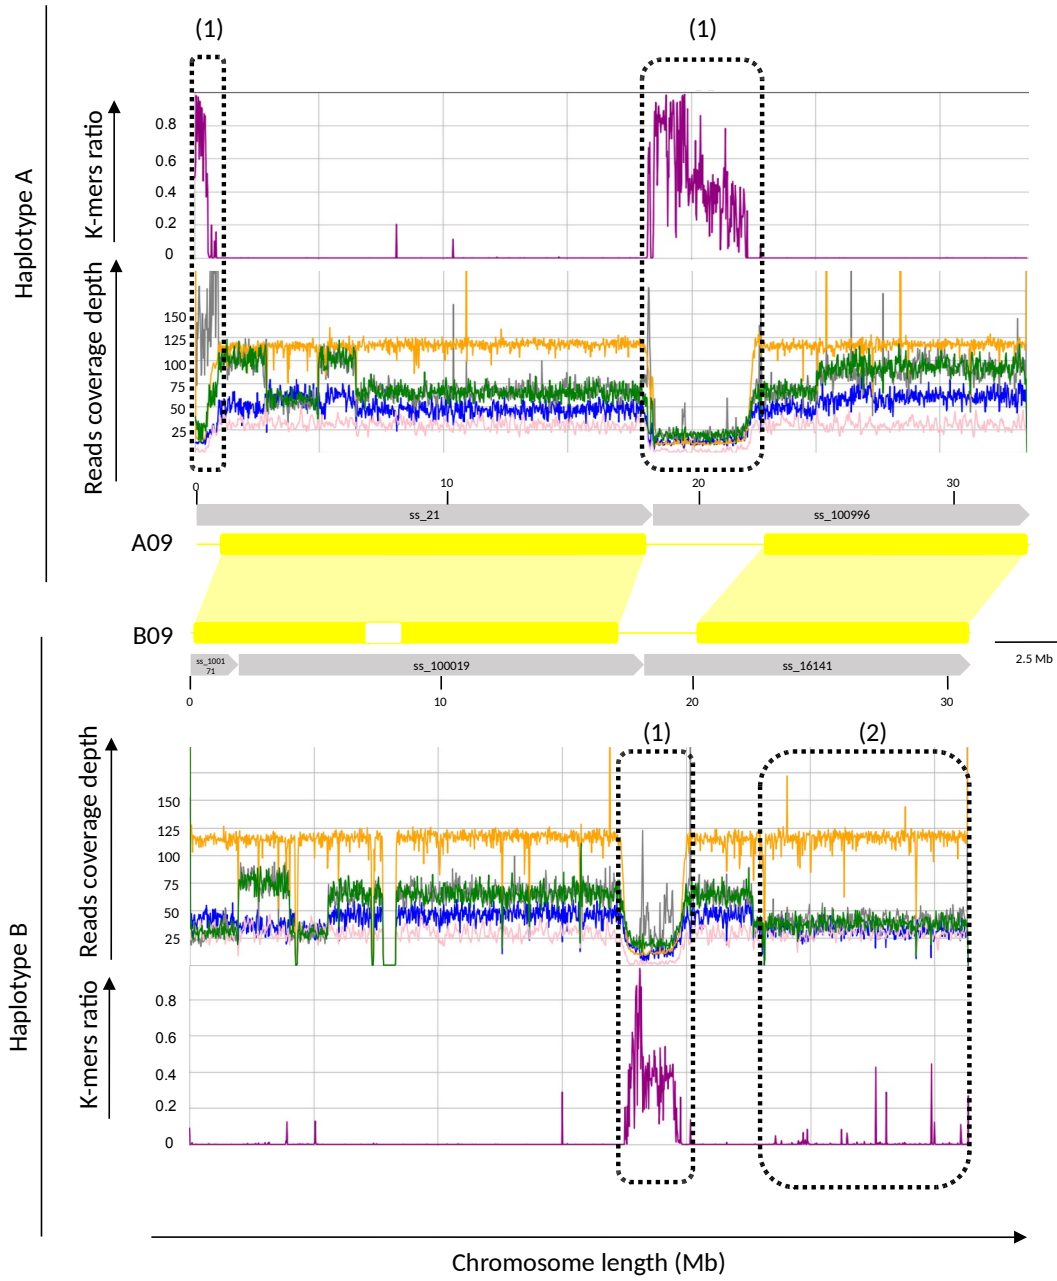

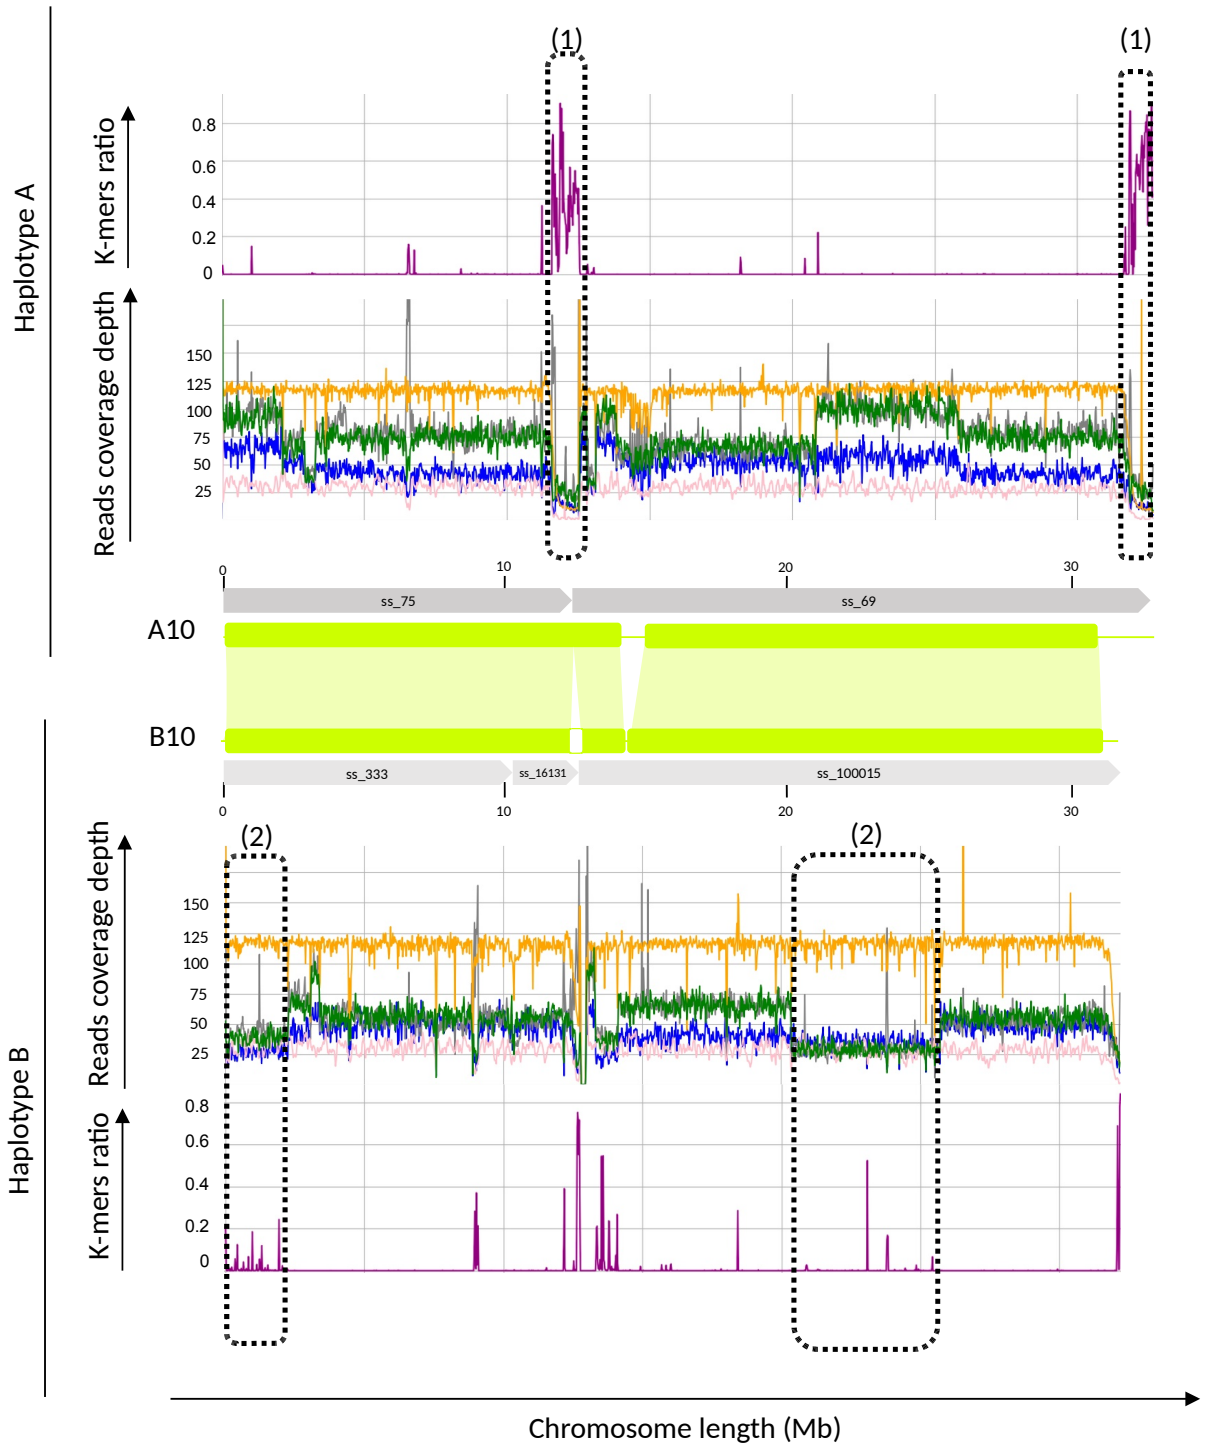

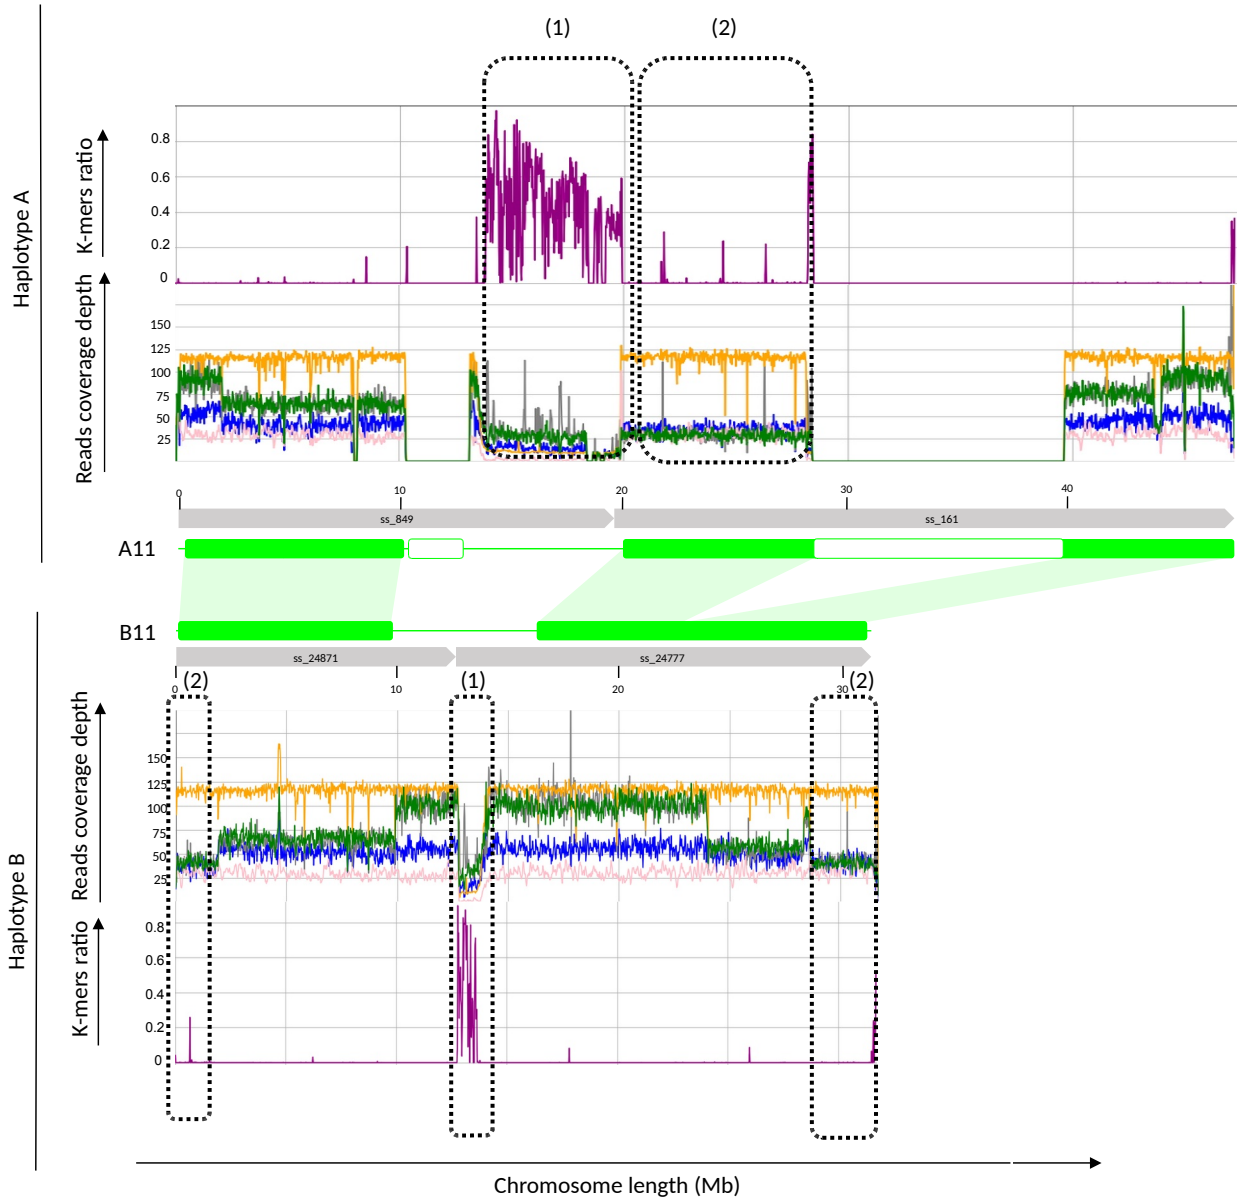

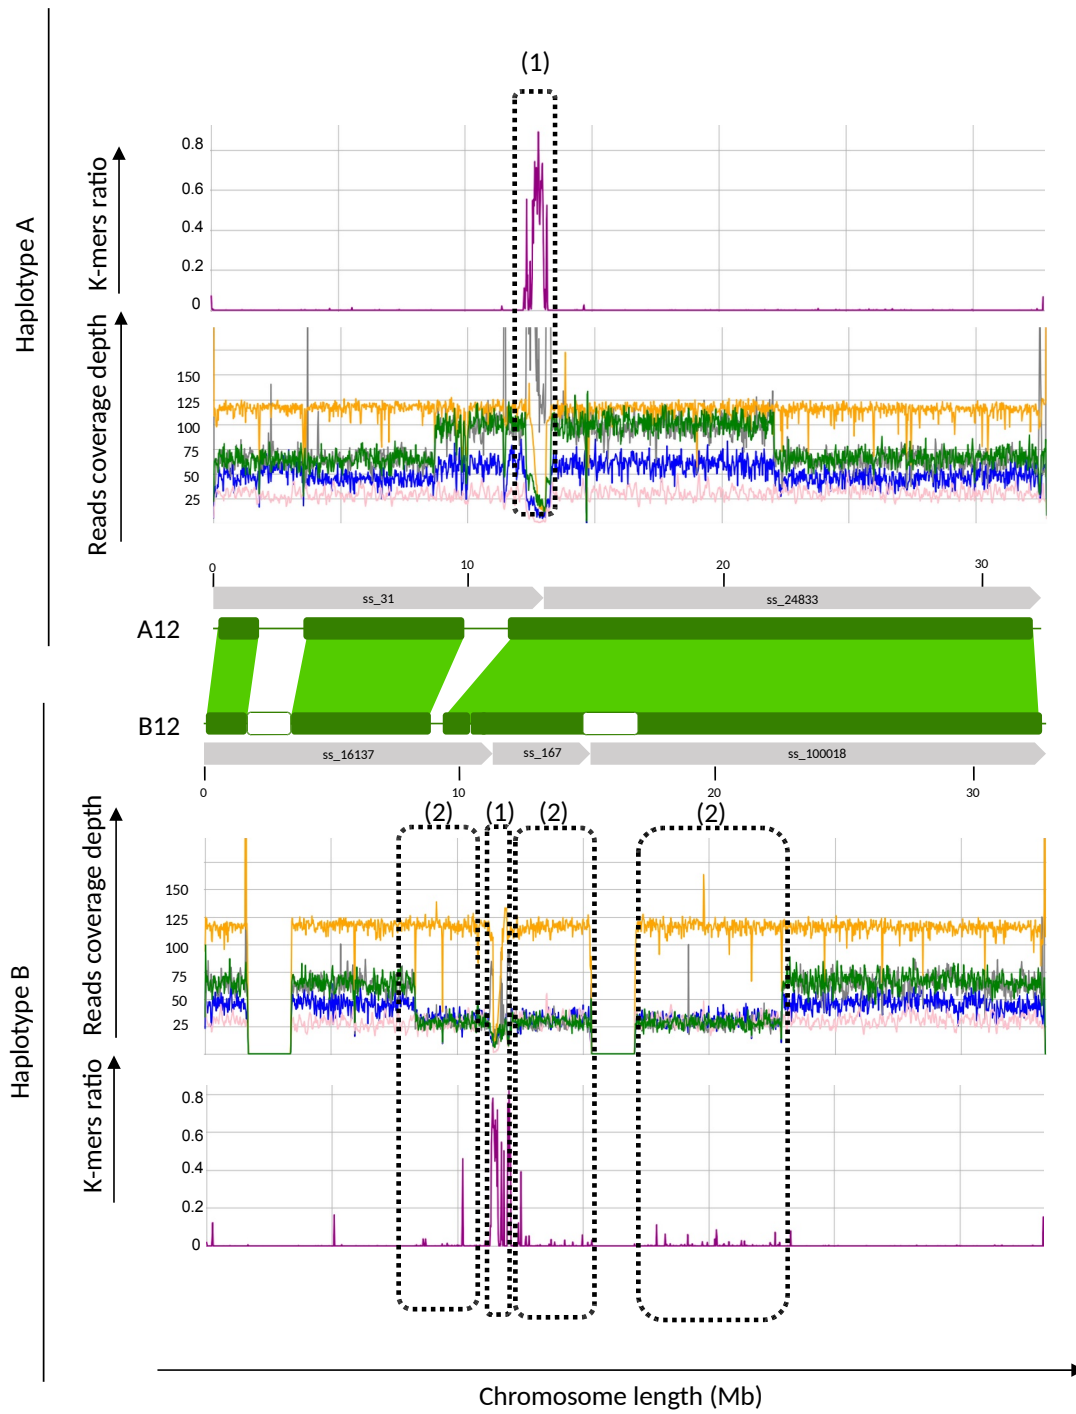

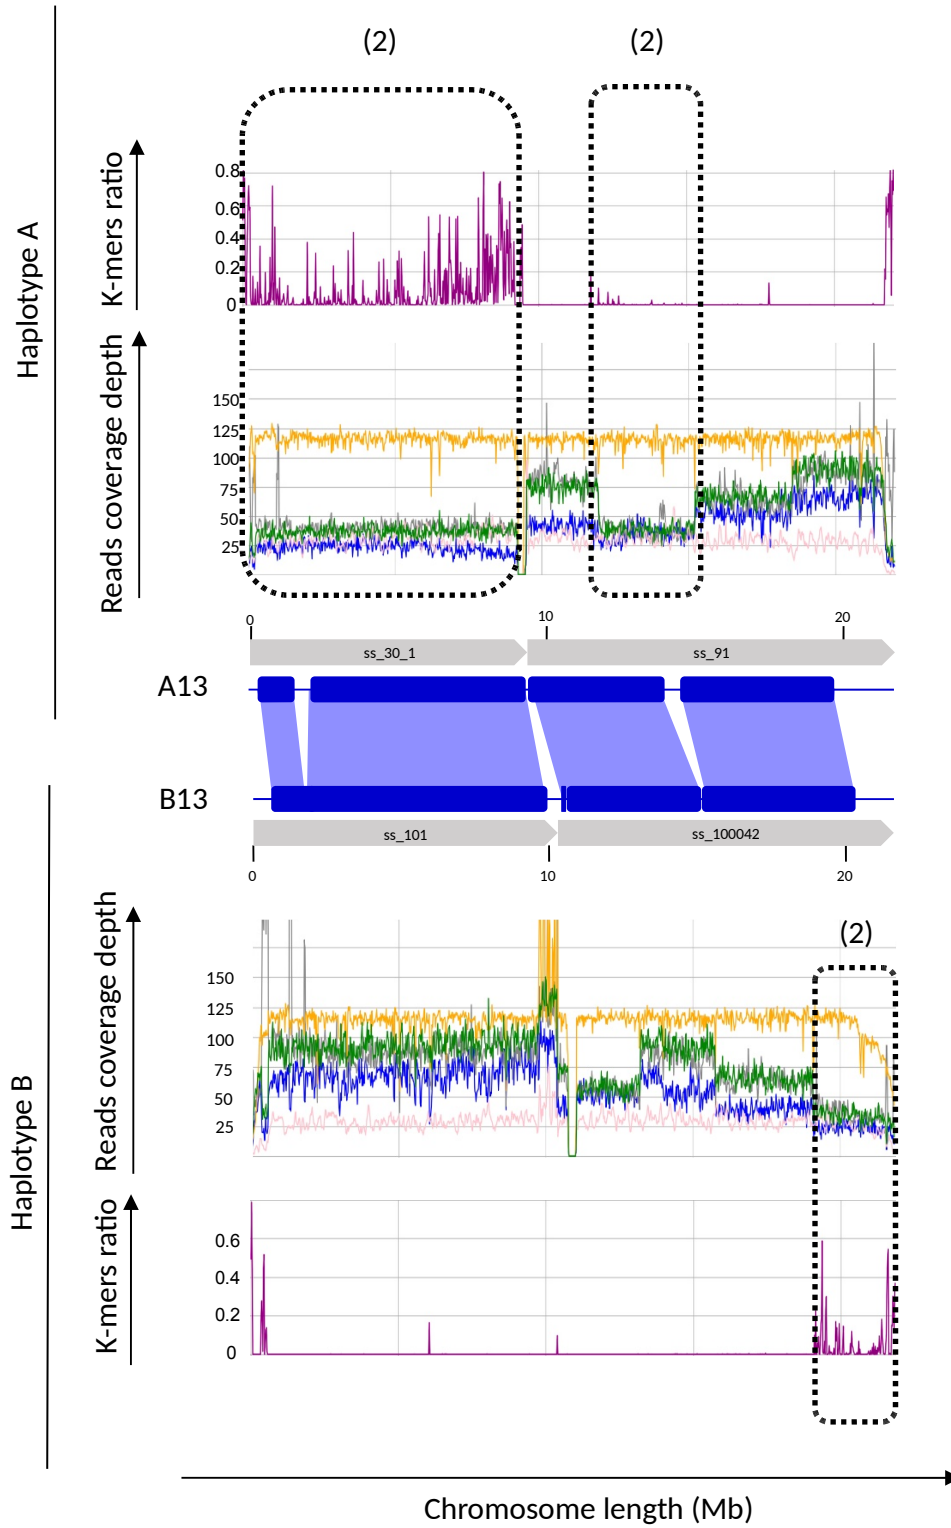

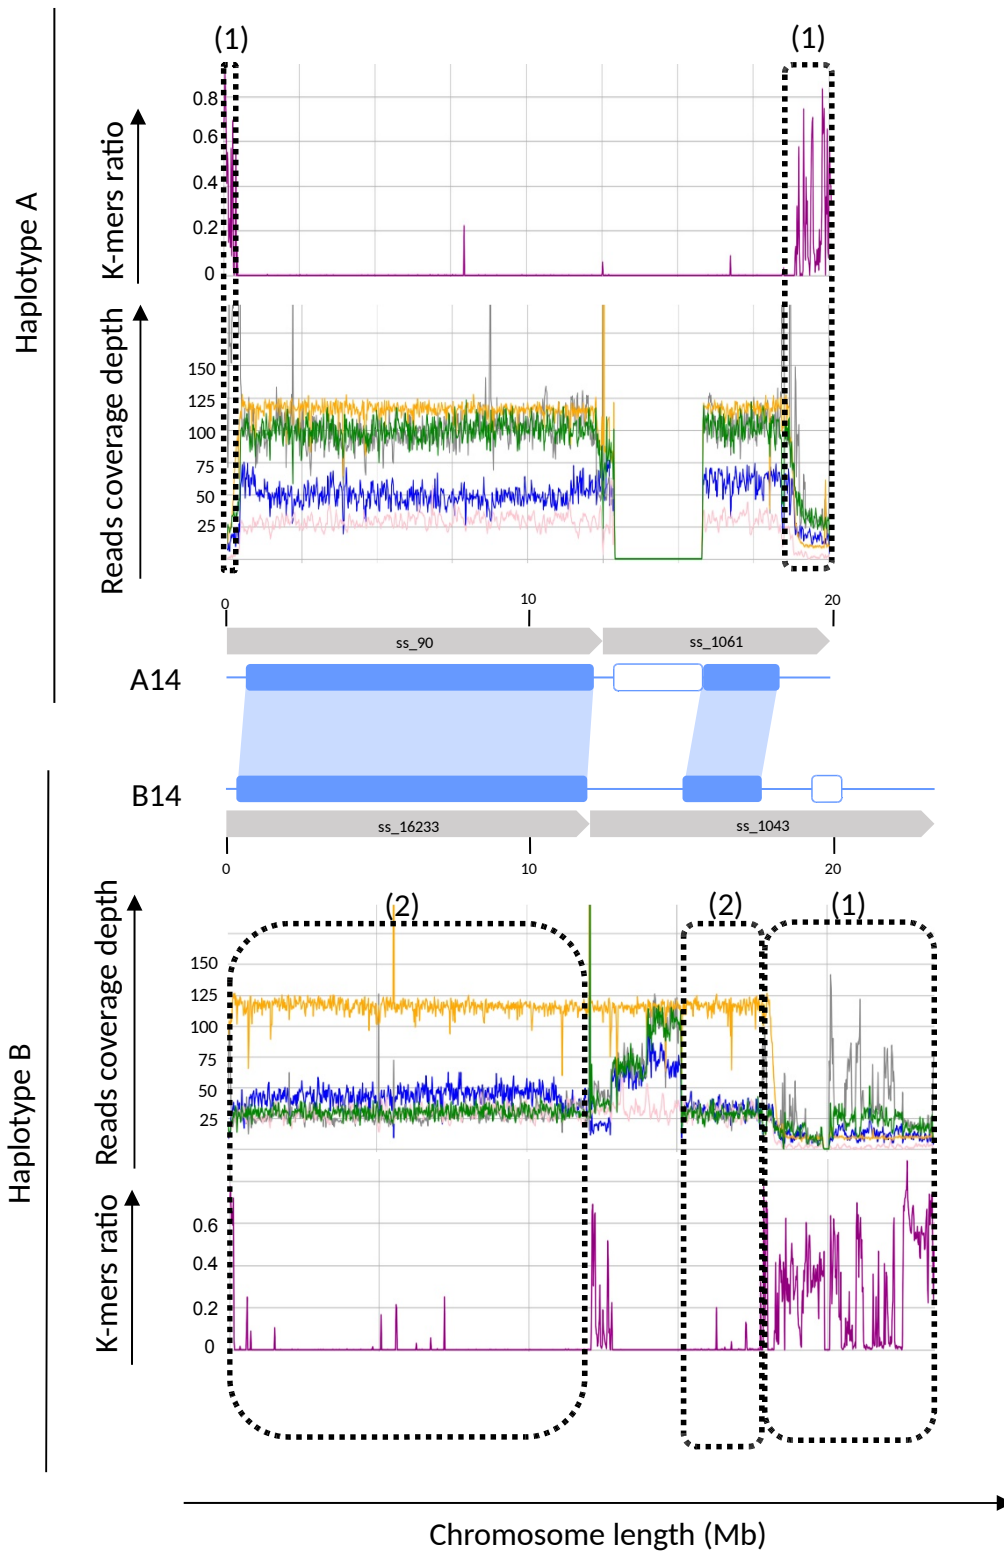

**A**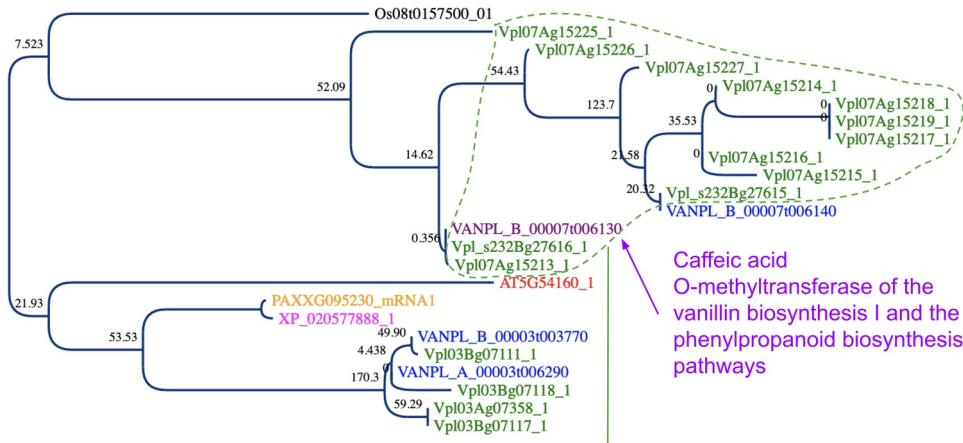**B**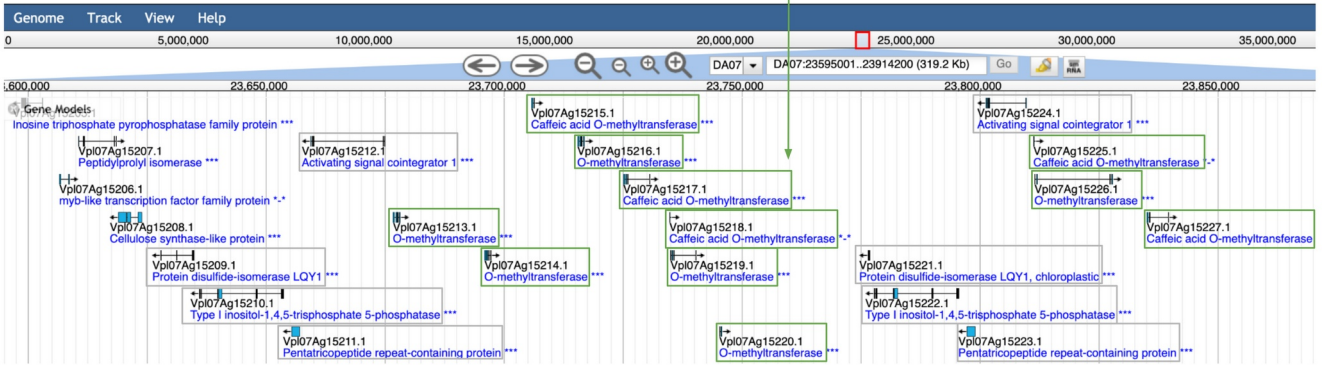**C**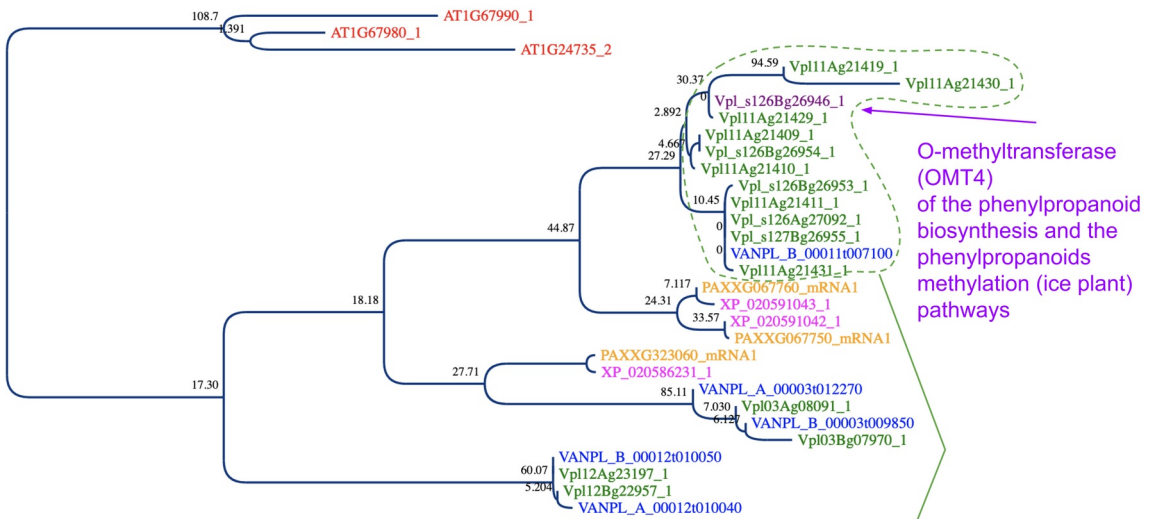**D**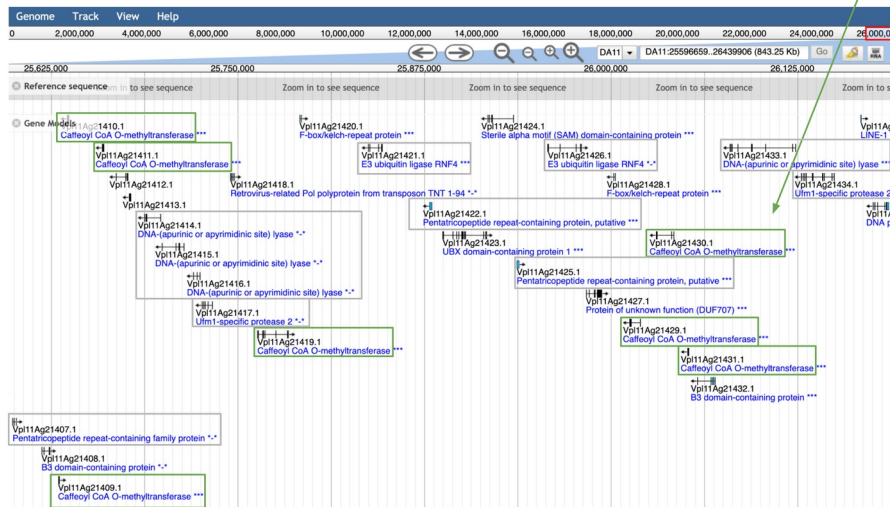

88 Supplemental Figure 11 Caffeic acid O-methyltransferase cluster comparison between  
89 CR0040 and *Daphna*. Phylogenetic trees and genomic positions of clusters of genes encoding  
90 for Caffeic acid O-methyltransferase (A, B; OG0000841; e.g. VANPL\_B\_00007t006130) and  
91 for O-methyltransferase (C, D; OG0000449; e.g. VANPL\_B\_00011t00710  
92 Vpl\_s126Bg26946.1). JBrowse screenshots were done from <https://vanilla-genome->  
93 [hub.cirad.fr/content/v-planifolia-daphna](https://vanilla-genome-hub.cirad.fr/content/v-planifolia-daphna), DA07:23595079..23914278 (319.2 Kb) and  
94 DA11:25632407..26200506 (568.1 Kb).



## 1 Supplemental tables

### 2 Supplemental Table 1 Nuclear classes in flow cytometry samples from *Vanilla planifolia* CR0040 3 nodal tissues

| Nuclear populations                                               | 2C               | 4E           | 8E            | 16E         | 32E          |
|-------------------------------------------------------------------|------------------|--------------|---------------|-------------|--------------|
| Proportion Frequency (%), mean<br>(sd) of 13 independent measures | 17.31<br>(10.08) | 18.52 (7.21) | 33.95 (11.41) | 21.5 (7.84) | 8.72 (12.73) |
| Mean (sd) of previous interpeak<br>ratio* (Brown et al., 2017)    |                  | 1.28 (0.01)  | 1.44 (0.02)   | 1.62 (0.03) | 1.75 (0.02)  |
| Mean (sd) of interpeak ratio*                                     |                  | 1.30 (0.03)  | 1.42 (0.03)   | 1.61 (0.02) | 1.73 (0.08)  |

4 \* Interpeak Ratio is the fluorescence intensity (I, arbitrary units) of peak n to peak (n — 1).

5 sd, standard deviation.

6 Supplemental Table 2 Main statistics of sequencing data production

| Technology  | Instrument  | Sample type | Number of sequences | Raw data (Gb) | N50 (Kb) |
|-------------|-------------|-------------|---------------------|---------------|----------|
| Illumina    | HiSeq3000   | DNA 10X     | 1,363,939,362       | 205           | 0.15     |
|             |             | genomics    |                     |               |          |
| ONT         | GridION     | DNA         | 2,855,136           | 16            | 13       |
| ONT         | PromethION  | DNA         | 18,044,495          | 131           | 18       |
| Pacific     | Sequel II   | DNA         | 15,306,231          | 1,178         | 15.2*    |
| BioSciences |             |             |                     |               |          |
| Illumina    | NovaSeq6000 | mRNA        | 857,606,502         | 129           | 0.15     |

7 Gb, giga bases ; Kb, kilo bases.

8 \*N50 for 69.75 Gb of HiFi reads

9 Supplemental Table 3 Main metrics of CR0040 genome assemblies

|                      | 10X     | ONT    | PacBio HiFi | Meta-assembly |
|----------------------|---------|--------|-------------|---------------|
| Input data           | 200 Gb  | 150 Gb | 69 Gb       |               |
| Estimated coverage   | 100X    | 75X    | 35X         |               |
| Cumulative size (Gb) | 1.68    | 1.9    | 3.4         | 3.3           |
| Contig number        | 254,400 | 21,443 | 24,534      | 180,957       |
| N50 (kb)             | 25      | 115    | 924         | 133           |
| Max size (Mb)        | 9.6     | 23.4   | 31          | 28.7          |

10 Gb, giga bases ; Kb, kilo bases ; Mb, mega bases.

11 Supplemental Table 4 Main metrics for the best genome assembly

|                      | All contigs | Hybrid<br>scaffolds | Contigs not<br>scaffolded | Haplotype A | Haplotype B |
|----------------------|-------------|---------------------|---------------------------|-------------|-------------|
| Cumulative size (Gb) | 3.4         | 1.9                 | 1.5                       | 1.5         | 1.9         |
| Numbers              | 24,534      | 874                 | 23,037                    | 3,874       | 17,655      |
| N50 (Mb)             | 0.92        | 6.2                 | 0.09                      | 3           | 0.4         |
| Max Size (Mb)        | 31          | 32                  | 10                        | 73          | 69          |
| N's (Mb)             | 0           | 79                  | 0                         | 37          | 40          |

12 Gb, giga bases ; Mb, mega bases.

13 Supplemental Table 5 Genic completeness for CR0040 genome

|                                        | Haplotype A   | Haplotype B   | Haplotypes A+B |
|----------------------------------------|---------------|---------------|----------------|
| <b>Genes in Viridiplantae database</b> | 425           | 425           | 425            |
| Complete single-copy                   | 379 (89.2%)   | 367 (86.4%)   | 17 (4%)        |
| Complete duplicated                    | 17 (4.0%)     | 17 (4%)       | 395 (92.9%)    |
| Fragment                               | 1 (0.2%)      | 27 (6.4%)     | 1 (0.2%)       |
| Missing                                | 28 (6.6%)     | 14 (3.3%)     | 12 (2.9%)      |
| <b>Genes in Embryophyta database</b>   | 1,614         | 1,614         | 1,614          |
| Complete single-copy                   | 1,436 (89%)   | 1,410 (87.4%) | 182 (11.3%)    |
| Complete duplicated                    | 53 (3.3%)     | 86 (5.3%)     | 1,367 (84.7%)  |
| Fragment                               | 13 (0.8%)     | 20 (1.2%)     | 13 (0.8%)      |
| Missing                                | 112 (6.9%)    | 98 (6.1%)     | 52 (3.2%)      |
| <b>Genes in Liliopsida database</b>    | 3,236         | 3,236         | 3,236          |
| Complete single-copy                   | 2,639 (81.6%) | 2,589 (80%)   | 402 (12.4%)    |
| Complete duplicated                    | 111 (3.4%)    | 174 (5.4%)    | 2,475 (76.5%)  |
| Fragment                               | 223 (6.9%)    | 249 (7.7%)    | 230 (7.1%)     |
| Missing                                | 263 (8.1%)    | 224 (6.9%)    | 129 (4%)       |

14 Supplemental Table 6 Main characteristics of RNA samples

| BioSample accession | Tissue      | Nanodrop concentration (ng/ $\mu$ L) | RNA Integrity Number |
|---------------------|-------------|--------------------------------------|----------------------|
| SAMN20691786        | Fruit       | 32.02                                | 8.7                  |
| SAMN20691787        | Leaf        | 119.00                               | 8.1                  |
| SAMN20691788        | Flower      | 121.50                               | 8.7                  |
| SAMN20691789        | Stem        | 47.55                                | 8.8                  |
| SAMN20691790        | Soil root   | 179.40                               | 9.1                  |
| SAMN20691791        | Aerial root | 98.32                                | 8.0                  |
| SAMN20691792        | Bud         | 326.80                               | 9.1                  |
| SAMN20691793        | Flower bud  | 112.70                               | 9.4                  |
| SAMN20691794        | Ovary       | 91.66                                | 9.0                  |
| SAMN20691795        | Mix         | 57.28                                | 8.5                  |

15 Supplemental Table 7 Main statistics of RNA-seq experiment

|               | Number of<br>reads | Alignment<br>rate (%) | Number of<br>transcripts | Mean transcript size<br>(bases) |
|---------------|--------------------|-----------------------|--------------------------|---------------------------------|
| Bud           | 47,018,576         | 93.84                 | 90,813                   | 2,049                           |
| Flower bud    | 49,472,733         | 92.87                 | 86,515                   | 1,971                           |
| Aerial roots  | 40,920,676         | 82.19                 | 81,970                   | 1,905                           |
| Leaves        | 40,129,580         | 93.55                 | 79,462                   | 1,959                           |
| Flowers       | 33,920,088         | 92.68                 | 75,827                   | 1,966                           |
| Fruits        | 32,941,273         | 89.28                 | 72,767                   | 1,903                           |
| Ovary         | 43,083,064         | 93.53                 | 83,388                   | 2,101                           |
| Soil root     | 43,969,059         | 90.39                 | 85,318                   | 2,063                           |
| Stem          | 43,692,744         | 92.60                 | 85,396                   | 1,932                           |
| Mixed tissues | 53,655,458         | 90.12                 | 92,217                   | 1,989                           |

## 16 Supplemental Table 8 Genic completeness for transcriptomes (BUSCO)

|                       | Complete<br>single-copy | Complete<br>duplicated | Fragment  | Missing   |
|-----------------------|-------------------------|------------------------|-----------|-----------|
| Bud                   | 5 (1.2%)                | 409 (96.2%)            | 1 (0.2%)  | 10 (2.4%) |
| Flower bud            | 4 (0.9%)                | 410 (96.5%)            | 1 (0.2%)  | 10 (2.4%) |
| Aerial roots          | 14 (3.3%)               | 392 (92.2%)            | 5 (1.2%)  | 14 (3.3%) |
| Leaves                | 7 (1.6%)                | 404 (95.1%)            | 1 (0.2%)  | 13 (3.1%) |
| Flowers               | 29 (6.8%)               | 362 (85.2%)            | 15 (3.5%) | 19 (4.5%) |
| Fruits                | 37 (8.7%)               | 348 (81.9%)            | 15 (3.5%) | 25 (5.9%) |
| Ovary                 | 11 (2.6%)               | 400 (94.1%)            | 3 (0.7%)  | 11 (2.6%) |
| Soil root             | 9 (2.1%)                | 402 (94.6%)            | 2 (0.5%)  | 12 (2.8%) |
| Stem                  | 7 (1.6%)                | 405 (95.3%)            | 2 (0.5%)  | 11 (2.6%) |
| Mixed tissues         | 7 (1.6%)                | 407 (95.8%)            | 1 (0.2%)  | 10 (2.4%) |
| Merged transcriptomes | 2 (0.5%)                | 412 (96.9%)            | 1 (0.2%)  | 10 (2.4%) |



17 Supplemental Table 9 Summary statistics of protein coding genes per haplotype

|                                  | Haplotype A | Haplotype B |
|----------------------------------|-------------|-------------|
| Number of protein coding genes   | 26,392      | 32,736      |
| Number of exons                  | 140,181     | 158,279     |
| Mean gene length (bp)            | 7,865       | 6,692       |
| Mean exon length (bp)            | 269         | 269         |
| Mean number of exons per mRNA    | 5.3         | 4.8         |
| Number of single exon gene       | 5,097       | 7,460       |
| Mean coding sequence length (bp) | 1,072       | 995         |
| Mean protein length (aa)         | 356         | 331         |
| Orthologs 1 to 1                 | 15,844      | 15,844      |
| Orthologs 1 to many              | 1,335       | 1,999       |
| Orthologs many to 1              | 6,052       | 4,721       |
| Orthologs many to many           | 847         | 704         |
| Haplotype A specific orthologs   | 742         | -           |
| Haplotype B specific orthologs   | -           | 4,724       |
| Orthogroups unassigned genes     | 985         | 4,515       |

18 bp, base pairs ; aa, amino acid.

19 Supplemental Table 10 Genic completeness for CR0040 annotation with BUSCO

| BUSCO 5.0.0                            | Haplotype A   | Haplotype B   | Haplotype A+B |
|----------------------------------------|---------------|---------------|---------------|
|                                        | 26392         | 32736         | 59128         |
| <b>Genes in Viridiplantae database</b> | 425           | 425           | 425           |
| Complete single-copy                   | 343 (80.7%)   | 337 (79.3%)   | 65 (15.3%)    |
| Complete duplicated                    | 18 (4.2%)     | 27 (6.4%)     | 331 (77.9%)   |
| Fragment                               | 26 (6.1%)     | 29 (6.8%)     | 13 (3.1%)     |
| Missing                                | 38 (9.0%)     | 32 (7.5%)     | 16 (3.7%)     |
| <b>Genes in Embryophyta database</b>   | 1,614         | 1,614         | 1,614         |
| Complete single-copy                   | 1,292 (80.0%) | 1,271 (78.7%) | 231 (14.3%)   |
| Complete duplicated                    | 56 (3.5%)     | 95 (5.9%)     | 1,245 (77.1%) |
| Fragment                               | 88 (5.5%)     | 79 (4.9%)     | 54 (3.3%)     |
| Missing                                | 178 (11%)     | 169 (10.5%)   | 84 (5.3%)     |
| <b>Genes in Liliopsida database</b>    | 3,236         | 3,236         | 3,236         |
| Complete single-copy                   | 2,383 (73.6%) | 2,354 (72.7%) | 539 (16.7%)   |
| Complete duplicated                    | 106 (3.3%)    | 187 (5.8%)    | 2,270 (70.1%) |
| Fragment                               | 313 (9.7%)    | 310 (9.6%)    | 222 (6.9%)    |
| Missing                                | 434 (13.4%)   | 385 (11.9%)   | 205 (6.3%)    |

20 Supplemental Table 11 RepeatMasker summary report

|                    | Haplotype<br>A (nb) | Haplotype<br>B (nb) | Haplotype<br>A (Mb) | Haplotype<br>B (Mb) | Haplotyp<br>e A<br>(%bp) | Haplotyp<br>e B<br>(%bp) | Haplotype<br>A+B<br>(%bp) |
|--------------------|---------------------|---------------------|---------------------|---------------------|--------------------------|--------------------------|---------------------------|
| Total interspersed |                     |                     |                     |                     |                          |                          |                           |
| repeats            | 914,993             | 1,270,877           | 659.98              | 930.76              | 46.6                     | 47.3                     | 47.0                      |
| Total              |                     |                     |                     |                     |                          |                          |                           |
| retroelements      | 690,136             | 992,412             | 577.09              | 827.14              | 40.7                     | 42.0                     | 41.5                      |
| Total LTR          | 378,082             | 563,026             | 229.77              | 344.86              | 16.2                     | 17.5                     | 17.0                      |
| LTR/Copia          | 134,148             | 173,060             | 89.02               | 118.81              | 6.3                      | 6.0                      | 6.1                       |
| LTR/Gypsi          | 209,894             | 346,287             | 123.85              | 203.4               | 8.7                      | 10.3                     | 9.7                       |
| LINES              | 136,139             | 170,984             | 168.91              | 236.34              | 11.9                     | 12.0                     | 12.0                      |
| Unclassified       |                     |                     |                     |                     |                          |                          |                           |
| retroelements      | 170,906             | 252,117             | 177.45              | 244.74              | 12.5                     | 12.4                     | 12.5                      |
| SINE               | 5,009               | 6,285               | 0.96                | 1.2                 | 0.1                      | 0.1                      | 0.1                       |
| DNA transposons    | 64,797              | 79,501              | 21.8                | 26.44               | 1.5                      | 1.4                      | 1.4                       |
| Unclassified       |                     |                     |                     |                     |                          |                          |                           |
| repeats            | 159,752             | 198,616             | 61.03               | 77.12               | 4.3                      | 3.9                      | 4.1                       |
| Simple repeats     | 306,532             | 477,099             | 191.41              | 330.64              | 13.5                     | 16.8                     | 15.4                      |
| Low complexity     |                     |                     |                     |                     |                          |                          |                           |
| regions            | 58,671              | 77,463              | 129.99              | 197.09              | 9.18                     | 10.0                     | 9.7                       |

21 nb, number ; Mb, mega bases ; bp, base pairs.

22 Supplemental Table 12 Number and repartition of protein coding genes and repeats per  
 23 chromosome and per haplotype of CR0040

| Chr    | CR0040 Haplotype A |                 |        |                   |                   | CR0040 Haplotype B |          |        |                   |                   |
|--------|--------------------|-----------------|--------|-------------------|-------------------|--------------------|----------|--------|-------------------|-------------------|
|        | w N                | wo N            | genes  | cds wo N<br>(%bp) | TEs wo N<br>(%bp) | w N                | wo N     | genes  | cds wo N<br>(%bp) | TEs wo N<br>(%bp) |
| 1      | 73.50              | 70.63           | 3,532  | 6.12              | 30.16             | 68.78              | 62.17    | 3,293  | 6.55              | 27.95             |
| 2      | 42.59              | 42.57           | 1,426  | 4.14              | 39.09             | 37.53              | 37.47    | 1,375  | 4.73              | 35.03             |
| 3      | 41.87              | 41.79           | 1,341  | 3.95              | 43.63             | 40.03              | 35.97    | 1,095  | 3.72              | 43.54             |
| 4      | 36.44              | 36.24           | 1,179  | 4.05              | 40.06             | 44.10              | 43.14    | 1,429  | 4.12              | 40.53             |
| 5      | 44.52              | 44.52           | 1,907  | 5.36              | 31.34             | 42.22              | 38.80    | 1,777  | 5.66              | 30.64             |
| 6      | 42.39              | 42.39           | 1,346  | 3.98              | 36.93             | 24.06              | 23.18    | 933    | 5.08              | 35.12             |
| 7      | 39.34              | 38.93           | 1,455  | 4.50              | 40.82             | 33.37              | 33.15    | 1,307  | 4.85              | 38.37             |
| 8      | 31.38              | 31.38           | 1,229  | 4.89              | 35.05             | 28.94              | 28.93    | 1,225  | 5.26              | 33.21             |
| 9      | 33.51              | 33.50           | 1,336  | 4.79              | 37.56             | 31.37              | 30.67    | 1,354  | 5.21              | 36.04             |
| 10     | 32.65              | 32.65           | 1,240  | 4.58              | 35.05             | 32.20              | 32.01    | 1,184  | 4.62              | 34.77             |
| 11     | 47.22              | 32.47           | 1,228  | 4.48              | 40.81             | 31.72              | 31.72    | 1,179  | 4.63              | 37.93             |
| 12     | 32.78              | 32.76           | 1,276  | 4.89              | 34.45             | 33.34              | 29.92    | 1,279  | 5.27              | 33.50             |
| 13     | 22.01              | 21.81           | 1,007  | 5.48              | 36.55             | 21.85              | 21.59    | 981    | 5.57              | 36.18             |
| 14     | 20.09              | 17.17           | 695    | 4.85              | 36.22             | 23.58              | 23.33    | 977    | 4.75              | 39.58             |
| 1-14   | 540.27             | 518.80          | 20,197 | 4.77              | 36.61             | 493.10             | 472.06   | 19,388 | 5.03              | 35.56             |
| 0      | 876.47             | 860.02          | 6195   | 0.41              | 47.33             | 1,476.30           | 1,455.48 | 13,348 | 0.60              | 46.97             |
| 1-14-0 | <b>1,416.74</b>    | <b>1,378.82</b> | 26,392 | 2.05              | 43.30             | 1,969.40           | 1,927.54 | 32,736 | 1.68              | 44.19             |

24 Pseudomolecules lengths with (w N) and without (wo N) the Ns (any base) nucleotide in Mbp.

25 The percentage of CDS/repeats is calculated as the percentage of bases covered by the CDS/repeats sequences per  
 26 chromosome.

27 Supplemental Table 13 Number and repartition of protein coding genes per chromosome and per  
 28 haplotype of Daphna

| Chr    | Daphna Haplotype A |        |        | Daphna Haplotype B |        |        |
|--------|--------------------|--------|--------|--------------------|--------|--------|
|        | w N                | wo N   | genes  | w N                | wo N   | genes  |
| 1      | 88.30              | 88.28  | 4,619  | 83.42              | 83.40  | 4,177  |
| 2      | 72.75              | 72.74  | 1,962  | 76.19              | 76.18  | 2,126  |
| 3      | 50.16              | 50.15  | 1,670  | 54.87              | 54.86  | 1,781  |
| 4      | 50.01              | 50.00  | 1,817  | 52.15              | 52.14  | 1,781  |
| 5      | 52.22              | 52.21  | 2,571  | 52.41              | 52.40  | 2,391  |
| 6      | 48.33              | 48.32  | 1,739  | 43.88              | 43.87  | 1,673  |
| 7      | 42.01              | 42.00  | 1,722  | 40.07              | 40.06  | 1,555  |
| 8      | 35.52              | 35.52  | 1,538  | 34.78              | 34.77  | 1,583  |
| 9      | 35.31              | 35.31  | 1,681  | 37.56              | 37.56  | 1,661  |
| 10     | 35.05              | 35.04  | 1,314  | 37.45              | 37.44  | 1,494  |
| 11     | 37.57              | 37.56  | 1,410  | 40.79              | 40.78  | 1,504  |
| 12     | 41.05              | 41.04  | 1,712  | 40.14              | 40.13  | 1,738  |
| 13     | 27.55              | 27.55  | 1,213  | 25.81              | 25.80  | 1,210  |
| 14     | 23.25              | 23.25  | 1,066  | 22.80              | 22.80  | 1,093  |
| 1-14   | 639.09             | 638.96 | 26,034 | 642.33             | 642.19 | 25,767 |
| 0      | 97.73              | 97.66  | 3133   | 101.93             | 101.87 | 3413   |
| 1-14-0 | 736.82             | 736.62 | 29,167 | 744.26             | 744.06 | 29,180 |

29 Pseudomolecules lengths with (w N) and without (wo N) the Ns (any base) nucleotide in Mbp.

30 Supplemental Table 14 Conserved and specific gene groups

|                               | Gene<br>number | Genes in<br>orthogroups | Number of<br>conserved<br>orthogroups | Number of<br>specific<br>orthogroups | Number of<br>specific<br>singleton genes |
|-------------------------------|----------------|-------------------------|---------------------------------------|--------------------------------------|------------------------------------------|
| CR0040 Haplotype A            | 26,392         | 25,779                  | 15,916                                | 88                                   | 613                                      |
| CR0040 Haplotype B            | 32,736         | 29,689                  | 16,211                                | 899                                  | 3,047                                    |
| Daphna Haplotype A            | 29,167         | 26,506                  | 17,131                                | 135                                  | 2,661                                    |
| Daphna Haplotype B            | 29,180         | 26,478                  | 17,060                                | 109                                  | 2,702                                    |
| <i>Phalaenopsis equestris</i> | 20,081         | 19,662                  | 13,045                                | 79                                   | 419                                      |
| <i>Phalaenopsis aphrodite</i> | 28,903         | 27,946                  | 13,322                                | 288                                  | 957                                      |
| <i>Oryza sativa</i>           | 43,770         | 32,466                  | 12,081                                | 2,731                                | 11,304                                   |

## 31 Supplemental Table 15 Sequencing depth of CR0040 genome per technology

|       | Haplotype A |        |          | Haplotype B |       |          |
|-------|-------------|--------|----------|-------------|-------|----------|
|       | PacBio HiFi | ONT    | Illumina | PacBio HiFi | ONT   | Illumina |
| Chr0  | 10.97       | 19.08  | 50.55    | 9.62        | 15.74 | 45.26    |
| Chr1  | 45.53       | 64.55  | 73.13    | 38.93       | 55.94 | 62.44    |
| Chr2  | 51.98       | 73.30  | 75.01    | 34.81       | 49.41 | 51.10    |
| Chr3  | 51.47       | 81.00  | 83.68    | 33.91       | 43.69 | 45.16    |
| Chr4  | 56.02       | 74.51  | 76.93    | 32.98       | 55.89 | 58.90    |
| Chr5  | 53.17       | 82.57  | 87.21    | 34.24       | 43.53 | 50.84    |
| Chr6  | 71.49       | 103.11 | 102.67   | 17.30       | 24.86 | 26.50    |
| Chr7  | 50.15       | 34.58  | 55.71    | 54.54       | 74.65 | 76.21    |
| Chr8  | 47.15       | 68.15  | 68.65    | 56.91       | 41.25 | 62.25    |
| Chr9  | 46.44       | 69.27  | 74.45    | 37.00       | 49.75 | 53.92    |
| Chr10 | 46.74       | 74.06  | 80.02    | 41.63       | 51.10 | 53.22    |
| Chr11 | 24.79       | 36.80  | 42.83    | 49.90       | 73.66 | 74.02    |
| Chr12 | 50.19       | 77.09  | 87.36    | 35.28       | 44.44 | 44.44    |
| Chr13 | 36.78       | 52.40  | 55.33    | 53.44       | 75.91 | 76.66    |
| Chr14 | 40.99       | 78.69  | 86.60    | 35.22       | 32.76 | 37.31    |

## 32 Supplemental Table 16 Sequencing depth of CR0040 genome using Daphna data sequences

|       | Haplotype A |          | Haplotype B |          |
|-------|-------------|----------|-------------|----------|
|       | ONT         | Illumina | ONT         | Illumina |
| Chr0  | 2.50        | 17.93    | 3.18        | 24.05    |
| Chr1  | 28.40       | 106.18   | 27.12       | 101.70   |
| Chr2  | 26.85       | 104.49   | 28.96       | 112.48   |
| Chr3  | 28.71       | 114.75   | 25.02       | 105.23   |
| Chr4  | 27.21       | 108.87   | 27.74       | 112.54   |
| Chr5  | 29.20       | 110.89   | 28.37       | 107.20   |
| Chr6  | 31.17       | 116.08   | 27.51       | 106.37   |
| Chr7  | 26.00       | 100.27   | 28.48       | 110.39   |
| Chr8  | 27.39       | 108.01   | 29.08       | 115.18   |
| Chr9  | 26.45       | 102.54   | 26.89       | 104.81   |
| Chr10 | 28.53       | 110.27   | 28.93       | 113.21   |
| Chr11 | 17.10       | 66.85    | 29.10       | 111.80   |
| Chr12 | 29.42       | 114.87   | 26.51       | 103.46   |
| Chr13 | 29.32       | 112.36   | 28.49       | 111.60   |
| Chr14 | 22.67       | 90.23    | 23.43       | 91.57    |



33 Supplemental Table 17 Cell cycle regulation genes found in CR0040 genome

|           |                        | <i>A. thaliana</i>       | CR0040 haplotype A       | CR0040 haplotype B       | <i>P. aphrodite</i>      |                 |
|-----------|------------------------|--------------------------|--------------------------|--------------------------|--------------------------|-----------------|
| CDKs      | CDKA                   | At3g48750                | VANPL_A_00001t01<br>2310 | VANPL_B_00001t01<br>1840 | PAXXG23147<br>0          |                 |
|           |                        |                          | VANPL_A_00014t00<br>5470 | VANPL_B_00014t00<br>7380 |                          |                 |
|           |                        | CDKB                     | At3g54180                | VANPL_A_00007t00<br>8490 | VANPL_B_00007t00<br>7640 | PAXXG08972<br>0 |
|           |                        |                          | At2g38620                | VANPL_A_00009t00<br>1400 | VANPL_B_00009t00<br>1350 | PAXXG11392<br>0 |
|           | At1g76540<br>At1g20930 |                          |                          |                          |                          |                 |
|           | <hr/>                  |                          |                          |                          |                          |                 |
|           | CYCs                   |                          |                          |                          |                          |                 |
|           |                        | CYCA                     | At1g80370                | VANPL_A_00008t01<br>1460 | VANPL_B_00004t01<br>2020 | PAXXG00804<br>0 |
|           |                        |                          | At1g15570                | VANPL_A_00005t00<br>0960 | VANPL_00313t0006<br>20   | PAXXG18301<br>0 |
|           |                        |                          | At5g25380                |                          | VANPL_B_00008t01<br>1460 | PAXXG05402<br>0 |
| At5g11300 |                        |                          |                          | VANPL_B_00005t00<br>1350 |                          |                 |
| At5g43080 |                        |                          |                          |                          |                          |                 |
| At1g47210 |                        |                          |                          |                          |                          |                 |
| At1g47220 |                        |                          |                          |                          |                          |                 |
| At1g47230 |                        |                          |                          |                          |                          |                 |
| CYCB      |                        | AT4G34160                |                          |                          |                          |                 |
|           |                        | At4g37490                | VANPL_A_00001t01<br>1770 | VANPL_B_00001t01<br>1320 | PAXXG00075<br>0          |                 |
|           | At5g06150              | VANPL_A_00001t02<br>4950 | VANPL_B_00001t01<br>9080 | PAXXG15655<br>0          |                          |                 |
|           | At3g11520              | VANPL_00050t0007<br>50   | VANPL_B_00001t01<br>1320 | PAXXG22889<br>0          |                          |                 |

|              |           |                          |                          |                 |
|--------------|-----------|--------------------------|--------------------------|-----------------|
|              | At2g26760 | VANPL_A_00001t01<br>9600 | VANPL_B_00005t00<br>0920 | PAXXG02847<br>0 |
|              | At1g34460 | VANPL_A_00001t01<br>1770 |                          | PAXXG00075<br>0 |
|              | At4g35620 | VANPL_A_00001t02<br>4950 |                          | PAXXG15655<br>0 |
|              | At2g17620 | VANPL_00050t0007<br>50   |                          | PAXXG21987<br>0 |
|              | At1g16330 | VANPL_A_00005t00<br>0640 |                          |                 |
|              |           | VANPL_A_00005t00<br>0650 |                          |                 |
|              |           | VANPL_A_00005t00<br>0650 |                          |                 |
|              | CYCD3-1   | At4g34160                |                          |                 |
| FZR (CCS52A) | At4g22910 | VANPL_A_00010t00<br>4300 | VANPL_B_00010t00<br>4420 | PAXXG07698<br>0 |
|              | At4g11920 | VANPL_A_00001t01<br>2550 | VANPL_B_00001t01<br>2090 | PAXXG08408<br>0 |
|              | At5g13840 |                          | VANPL_13258t0000<br>30   | PAXXG08252<br>0 |
| WEE1         | At1g02970 | VANPL_A_00011t01<br>0580 | VANPL_B_00011t01<br>0080 | PATC144561      |
| KRP          | At2g23430 | VANPL_A_00008t00<br>3440 | VANPL_B_00006t00<br>3720 | PAXXG04855<br>0 |
|              | At3g50630 | VANPL_A_00004t00<br>6200 | VANPL_B_00008t00<br>3330 | PAXXG11133<br>0 |
|              | At5g48820 | VANPL_A_00002t00<br>6250 | VANPL_B_00004t00<br>6400 | PAXXG29015<br>0 |
|              | At2g32710 | VANPL_A_00001t03<br>1310 | VANPL_B_00002t00<br>6550 | PAXXG11558<br>0 |
|              | At3g24810 |                          | VANPL_B_00001t02<br>8840 |                 |
|              | At3g19150 |                          | VANPL_B_00001t02<br>0090 |                 |
|              | At1g49620 |                          | VANPL_00053t0015<br>50   |                 |
| ILP1         | At5g08550 | VANPL_A_00012t0057<br>30 | VANPL_B_00012t0056<br>80 | PAXXG094170     |
| ADF          | At3g46010 | VANPL_A_00010t0019<br>00 | VANPL_B_00009t0089<br>80 | PAXXG101780     |
|              | At3g46000 | VANPL_A_00011t0036<br>50 | VANPL_B_00010t0018<br>60 | PAXXG066610     |
|              | At5g59880 | VANPL_A_00009t0086<br>90 | VANPL_B_00002t0035<br>60 | PAXXG194280     |

|           |                          |                          |             |
|-----------|--------------------------|--------------------------|-------------|
| At5g59890 | VANPL_A_00001t0193<br>80 | VANPL_B_00009t0023<br>90 | PAXXG119700 |
| At2g16700 | VANPL_A_00002t0036<br>20 | VANPL_B_00001t0121<br>50 | PAXXG241790 |
| At2g31200 | VANPL_A_00014t0042<br>00 | VANPL_B_00011t0036<br>80 | PAXXG043520 |
| At4g25590 | VANPL_A_00005t0087<br>70 | VANPL_B_00001t0188<br>50 | PAXXG173900 |
| At4g00680 | VANPL_A_00003t0004<br>30 | VANPL_B_00014t0043<br>30 | PAXXG146670 |
| At4g34970 | VANPL_A_00009t0024<br>90 | VANPL_00170t000390       | PAXXG125360 |
| At1g01750 | VANPL_A_00006t0025<br>70 | VANPL_01089t000240       | PAXXG160710 |
| At3g45990 |                          |                          | PAXXG009590 |
| At5g52360 |                          |                          | PAXXG386760 |
|           |                          |                          | PAXXG302270 |

34 CDKs : Cyclin-Dependent Kinases ; CYCs : Cyclins ; FZR : Fizzy-Related protein ; WEE1 : WEE1 like protein kinase ; KRP : cyclin-dependent  
35 kinase inhibitor ; ILP : Transcriptional repressor ILP1 ; ADF : Actin-Depolymerizing Factor ;
